# Supplementary material for: Synthesis and Physicochemical Properties of 2-SF5-(Aza)Indoles, a New Family of SF5 Heterocycles
Source: PubMed Central journal article supplement — ACS Org Inorg Au. 2021 Jul 6;1(2):43–50. doi: 10.1021/acsorginorgau.1c00010 (PMC9954346; doi:10.1021/acsorginorgau.1c00010), 2021-07-06

# Synthesis and Physico-Chemical Properties of 2-SF<sub>5</sub>-(Aza)indoles, A New Family of SF<sub>5</sub>-Heterocycles

Vincent Debrauwer,[a] Ivo Leito,[b] Märt Lõkov,[b] Sofja Tshepelevitsh,[b] Michael Parmentier,[c] Nicolas

Blanchard\*[a] and Vincent Bizet\*[a]

<sup>a</sup>Université de Haute-Alsace, Université de Strasbourg, CNRS, LIMA, UMR 7042, 68000 Mulhouse, France

<sup>b</sup>Institute of Chemistry, University of Tartu, Tartu 50411, Estonia

<sup>c</sup>Chemical and Analytical Development, Novartis Pharma AG, CH-4056 Basel, Switzerland

[n.blanchard@unistra.fr](mailto:n.blanchard@unistra.fr)

[vbizet@unistra.fr](mailto:vbizet@unistra.fr)

## Supporting Information

### Table of Contents

|            |                                                                                                                         |            |
|------------|-------------------------------------------------------------------------------------------------------------------------|------------|
| <b>1</b>   | <b>General</b>                                                                                                          | <b>S2</b>  |
| <b>2</b>   | <b>Experimental procedures</b>                                                                                          | <b>S3</b>  |
| <b>2.1</b> | <b>General procedure (GP1) for the synthesis of <i>N</i>-(2-ethynylphenyl)-4-methylbenzenesulfonamide derivatives 1</b> | <b>S3</b>  |
| <b>2.2</b> | <b>General procedure (GP2) for the radical addition of SF<sub>5</sub>Cl on terminal alkynes</b>                         | <b>S3</b>  |
| <b>2.3</b> | <b>General procedure (GP3) for the synthesis of the 2-SF<sub>5</sub> indoles 5:</b>                                     | <b>S4</b>  |
| <b>2.4</b> | <b>General procedure (GP4) for the synthesis of SF<sub>5</sub>-alkynes 3:</b>                                           | <b>S4</b>  |
| <b>2.5</b> | <b>General procedure (GP5) for the synthesis of the 2-SF<sub>5</sub>-<i>N</i>-Ts-indoles 4:</b>                         | <b>S4</b>  |
| <b>3</b>   | <b>Evaluation of protecting groups</b>                                                                                  | <b>S5</b>  |
| <b>4</b>   | <b>Monitoring of the cyclization reaction by <sup>19</sup>F NMR</b>                                                     | <b>S5</b>  |
| <b>5</b>   | <b>Characterization data</b>                                                                                            | <b>S6</b>  |
| <b>6</b>   | <b>DSC analyzes</b>                                                                                                     | <b>S35</b> |
| <b>7</b>   | <b>Physico-chemical properties</b>                                                                                      | <b>S43</b> |
| <b>7.1</b> | <b>p<i>K</i><sub>a</sub> determination in acetonitrile</b>                                                              | <b>S43</b> |
| <b>7.2</b> | <b>Log<i>P</i> measurements</b>                                                                                         | <b>S46</b> |
| <b>8</b>   | <b>Ames test</b>                                                                                                        | <b>S49</b> |
| <b>9</b>   | <b>References</b>                                                                                                       | <b>S61</b> |
| <b>10</b>  | <b>NMR spectra</b>                                                                                                      | <b>S62</b> |

## 1 General

NMR spectra were recorded on Bruker AV 400 or AV 500 spectrometer at 400 MHz or 500 MHz for  $^1\text{H}$  NMR, at 100 or 125 MHz for  $^{13}\text{C}$  NMR and at 471 MHz for  $^{19}\text{F}$  NMR. The spectra were calibrated using undeuterated solvent as internal reference, unless otherwise indicated.  $^1\text{H}$  and  $^{13}\text{C}\{^1\text{H}\}$  NMR chemical shifts are given in ppm relative to  $\text{SiMe}_4$ , with the solvent resonance used as internal reference.  $^{19}\text{F}\{^1\text{H}\}$  NMR chemical shifts are reported in ppm relative to  $\text{CFCl}_3$ . NMR yields were determined by  $^{19}\text{F}$  NMR, using trifluorotoluene as internal standard. The following abbreviations were used to explain multiplicities: s = singlet, d = doublet, t = triplet, q = quartet, quint. = quintet, sex. = sextet, m = multiplet, and b = broad. Coupling constant ( $J$ ) were reported in Hertz. High resolution mass spectra (HRMS) in positive mode were recorded using a 6520 series quadrupole time-of-flight (Q-TOF) mass spectrometer (Agilent) fitted with a multimode ion source (in mixed mode that enables both electrospray ionization, ESI, and atmospheric pressure chemical ionization, APCI). Samples were directly infused into the source using 50/50-methanol/formic acid 0.2 % in water. Infrared spectra were obtained on a *Perkin-Elmer* 1650 FT-IR spectrometer using neat samples on a diamond ATR Golden Gate sampler. Tetrahydrofuran (THF) was distilled under nitrogen from sodium-benzophenone. Reagents were purchased from Merck, Fluorochem or ABCR and used without further purification, unless otherwise noted. All non-commercially available reagents were prepared using literature procedure.<sup>1</sup> Yields refer to chromatographically and spectroscopically ( $^1\text{H}$ ,  $^{13}\text{C}$  and  $^{19}\text{F}$  NMR) homogeneous materials, unless otherwise noted. Reactions were monitored by thin-layer chromatography (TLC) carried out on Merck TLC silica gel 60 F254 aluminum plates, using UV light or potassium permanganate as visualizing agents. All separations were performed by chromatography on Merck silica gel 60 (40-63  $\mu\text{m}$ ) or by preparative TLC chromatography (layer thickness of 500  $\mu\text{m}$ ).

## 2 Experimental procedures

### 2.1 General procedure (GP1) for the synthesis of *N*-(2-ethynylphenyl)-4-methylbenzenesulfonamide derivatives **1**

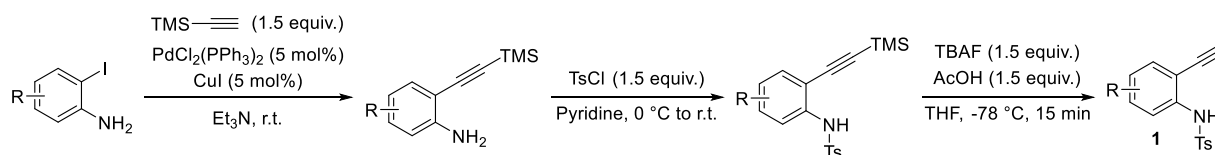

In a 100 mL round bottom flask equipped with a magnetic stir bar, the iodoaniline derivative (1 equiv.),  $\text{PdCl}_2(\text{PPh}_3)_2$  (5 mol%) and  $\text{CuI}$  (5 mol%) were charged and dissolved in  $\text{Et}_3\text{N}$  (0.4 M) under  $\text{N}_2$ . Trimethylsilylacetylene (1.5 equiv.) was added dropwise to the mixture and it was stirred at room temperature until completion of the reaction. The crude mixture was filtered on a short pad of silica gel and concentrated under reduced pressure. Without further purification it was dissolved in pyridine (0.5 M) and cooled down to 0 °C, *p*-toluenesulfonyl chloride (1.5 equiv.) was added portionwise under  $\text{N}_2$ . The reaction mixture was stirred at room temperature until full conversion was observed by TLC. The reaction was quenched with water and extracted with 3 volumes of EtOAc, the combined layers were dried over  $\text{MgSO}_4$ , filtered and concentrated under reduced pressure. Without further purification, the crude mixture was dissolved in THF and cooled down to -78 °C, then AcOH (1.5 equiv.) and TBAF (1.5 equiv.) were added. The reaction was stirred at this temperature for 15 min and quenched with saturated aqueous solution of  $\text{NH}_4\text{Cl}$  and extracted with 3 volumes of EtOAc. The combined organic layers were dried over  $\text{MgSO}_4$ , filtered, and concentrated under reduced pressure. The crude mixture was purified by silica gel column chromatography to afford the *N*-(2-ethynylphenyl)-4-methylbenzenesulfonamide derivatives **1**.

### 2.2 General procedure (GP2) for the radical addition of $\text{SF}_5\text{Cl}$ on terminal alkynes

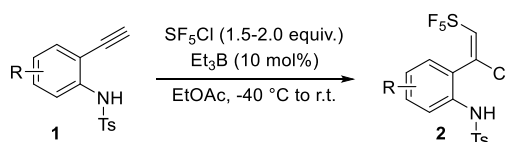

In a 10 mL pressure tube under  $\text{N}_2$  equipped with a magnetic stir bar, the *N*-(2-ethynylphenyl)-4-methylbenzenesulfonamide **1** (1.0 equiv.) derivative was introduced and dissolved in EtOAc (0.4 M). At -40 °C, gaseous  $\text{SF}_5\text{Cl}$  (1.5 - 2.0 equiv.) was condensed in the solution and it was stirred for 5 min at this temperature before  $\text{Et}_3\text{B}$  (10 mol%) was added dropwise followed by a catalytic amount of air. The tube was sealed, and it was stirred at room temperature for 16 h. The reaction mixture was quenched with saturated solution of  $\text{NaHCO}_3$  and it was extracted with 3 volumes of EtOAc. The combined organic layers were dried over  $\text{MgSO}_4$ , filtered, and concentrated at reduced pressure. No further purification is needed when conversion is total, otherwise NMR yield is reported, and the corresponding product **2** was purified by chromatography on silica gel.

**2.3 General procedure (GP3) for the synthesis of the 2-SF<sub>5</sub> indoles 5:**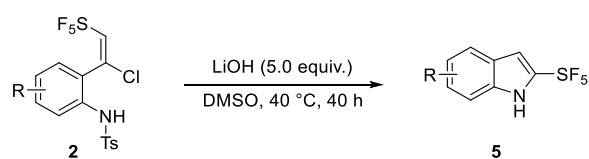

In 5 mL round bottom flask equipped with a magnetic stir bar containing the chloro pentafluorosulfanylated olefin **2** was introduced LiOH.H<sub>2</sub>O (5 equiv.) and DMSO (0.4 M). The reaction mixture was stirred at 40 °C for 40 h. The reaction was quenched with saturated solution of NH<sub>4</sub>Cl and extracted with 3 volumes of EtOAc. The combined organic layers were dried over MgSO<sub>4</sub>, filtered and concentrated under reduced pressure. The crude mixture was purified by silica gel column chromatography affording the corresponding 2-SF<sub>5</sub> indole **5**.

**2.4 General procedure (GP4) for the synthesis of SF<sub>5</sub>-alkynes 3:**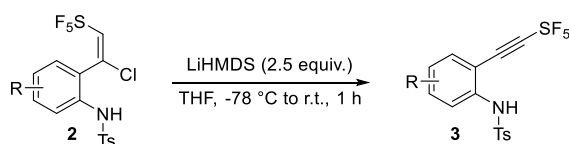

In a 5 mL Schlenk tube equipped with a magnetic stir bar, the chloro pentafluorosulfanylated olefin **2** was dissolved in THF (0.2 M) under N<sub>2</sub> and the mixture was cooled down to -78 °C. LiHMDS (2.5 equiv.) was added dropwise and the reaction was stirred at rt for 1 hour. The reaction mixture was quenched with a saturated solution of NH<sub>4</sub>Cl and extracted with 3 volumes of EtOAc. The combined organic layers were dried over MgSO<sub>4</sub>, filtered, and concentrated under reduced pressure to give pure product **3**. No purification was necessary at this step.

**2.5 General procedure (GP5) for the synthesis of the 2-SF<sub>5</sub>-N-Ts-indoles 4:**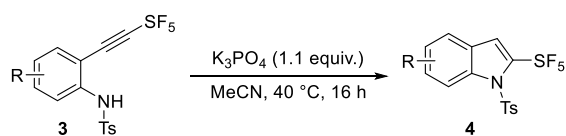

In a 10 mL Shlenck tube under N<sub>2</sub> equipped with a magnetic stir bar, SF<sub>5</sub>-alkyne **3** and K<sub>3</sub>PO<sub>4</sub> (1.1 equiv.) were dissolved in MeCN (0.07 M) and stirred at 40 °C for 16 hours. The mixture was concentrated and purified by silica gel column chromatography (P.E/EtOAc 90/10) affording the corresponding N-Ts 2-SF<sub>5</sub>-indole **4**.

## 3 Evaluation of protecting groups

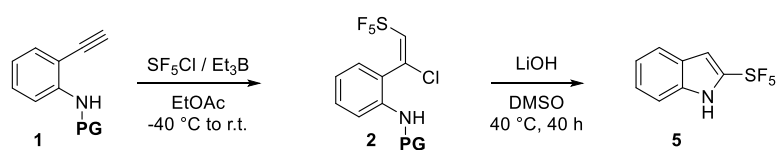

| PG = |      |      |
|------|------|------|
| H    | 0%   | -    |
| Ts   | 100% | 100% |
| Ms   | 9%   | -    |
| Cbz  | 49%  | 0%   |
| Bn   | 0%   | -    |
| Boc  | 0%   | -    |
| Bz   | 100% | 0%   |

<sup>19</sup>F NMR yields

4 Monitoring of the cyclization reaction by <sup>19</sup>F NMR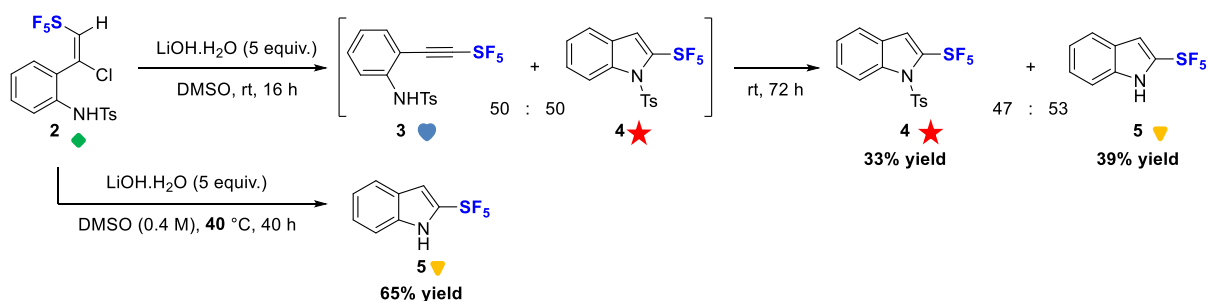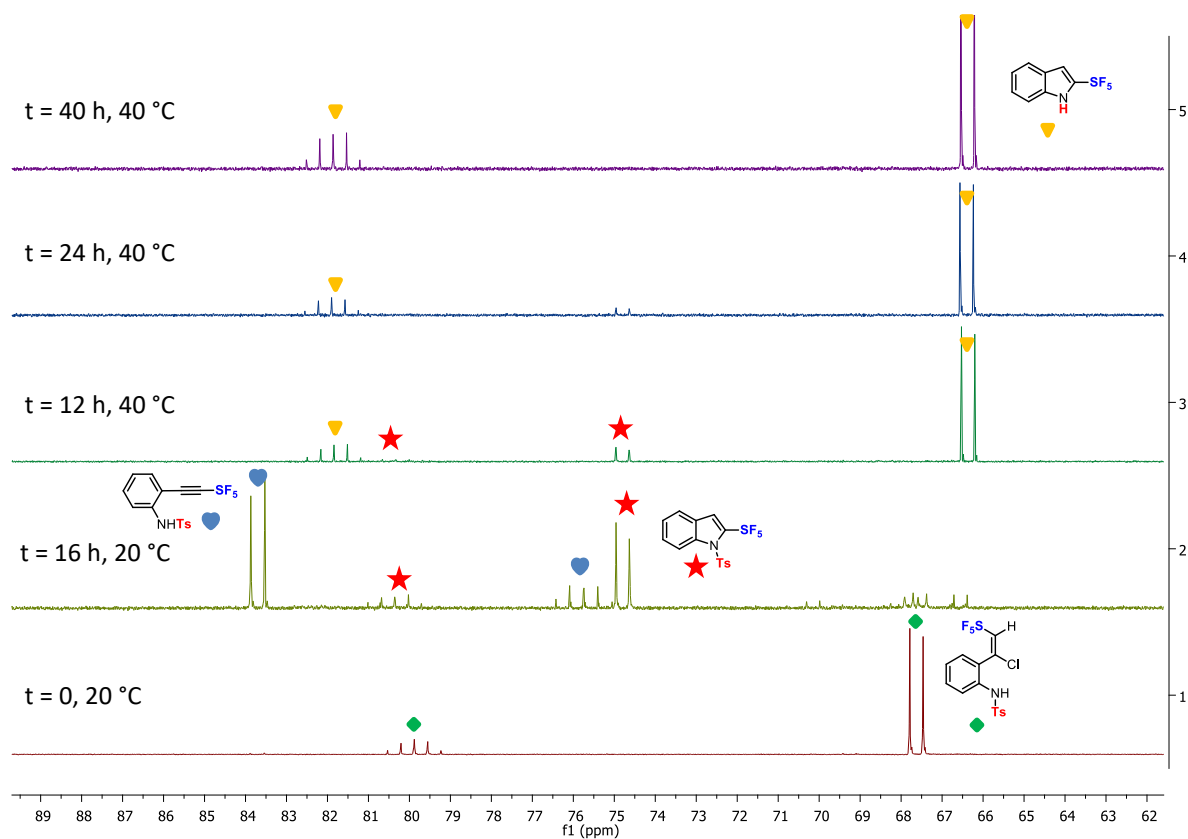

## 5 Characterization data

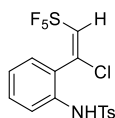

### (E)-N-(2-(1-Chloro-2-(pentafluoro- $\lambda^6$ -sulfanyl)vinyl)phenyl)-4-toluenesulfonamide **2a**

Prepared according to **GP2** from *N*-(2-ethynylphenyl)-4-toluenesulfonamide **1a** (600 mg, 2.21 mmol, 1 equiv.). No purification needed and **2a** (958 mg, 100 %) was obtained as grey powder.

$^1\text{H-NMR}$  ( $\text{CDCl}_3$ , 500 MHz):  $\delta$  (ppm) = 2.37 (s, 3H), 6.64 (bs, 1H), 7.02 (quint.,  $J = 7.5$  Hz, 1H), 7.07-7.15 (m, 2H), 7.25 (d,  $J = 8.2$  Hz, 2H), 7.34-7.39 (m, 1H), 7.68 (d,  $J = 8.3$  Hz, 1H), 7.75 (d,  $J = 8.3$  Hz, 2H);  $^{13}\text{C}\{^1\text{H}\}$ -NMR ( $\text{CDCl}_3$ , 125 MHz):  $\delta$  (ppm) = 21.7, 119.7, 124.2, 125.5, 127.6, 129.1, 129.8, 131.6, 133.7, 136.2, 138.9 (quint.,  $J = 6.7$  Hz), 142.0 (quint.,  $J = 21.5$  Hz), 144.6;  $^{19}\text{F}\{^1\text{H}\}$ -NMR ( $\text{CDCl}_3$ , 471 MHz):  $\delta$  (ppm) = 67.6 (d,  $J = 152.8$  Hz, 4F), 79.2-80.5 (m, 1F); IR spectrum (neat) ( $\text{cm}^{-1}$ ) = 3279, 3102, 1600, 1491, 1407, 1340, 1162, 1091, 931, 860, 844, 714, 663, 559; HRMS (ESI):  $m/z$  calculated for  $\text{C}_{15}\text{H}_{13}\text{ClF}_5\text{NO}_2\text{S}_2^{+\bullet}$   $[\text{M}+\text{H}]^{+\bullet}$  434.0069, found 434.0062.

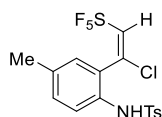

### (E)-N-(2-(1-Chloro-2-(pentafluoro- $\lambda^6$ -sulfanyl)vinyl)-4-methylphenyl)-4-toluenesulfonamide **2b**

Prepared according to **GP2** from *N*-(2-ethynyl-4-methylphenyl)-4-toluenesulfonamide **1b** (200 mg, 0.7 mmol, 1 equiv.). No purification needed and **2b** (294 mg, 94 %) was obtained as orange powder.

$^1\text{H-NMR}$  ( $\text{CDCl}_3$ , 500 MHz):  $\delta$  (ppm) = 2.27 (s, 3H), 2.37 (s, 3H), 6.51 (s, 1H), 6.92 (s, 1H), 6.98 (quint.,  $J = 7.4$  Hz, 1H), 7.17 (dd,  $J = 8.5$  Hz,  $J = 2.1$  Hz, 1H), 7.23 (d,  $J = 8.1$  Hz, 2H), 7.56 (d,  $J = 8.5$  Hz, 1H), 7.73 (d,  $J = 8.3$  Hz, 2H);  $^{13}\text{C}\{^1\text{H}\}$ -NMR ( $\text{CDCl}_3$ , 125 MHz):  $\delta$  (ppm) = 20.7, 21.7, 120.4, 125.9, 127.6, 129.3, 129.8, 131.0, 132.2, 134.4, 136.3, 139.1 (quint.,  $J = 6.3$  Hz), 141.6 (quint.,  $J = 21.5$  Hz), 144.4;  $^{19}\text{F}\{^1\text{H}\}$ -NMR ( $\text{CDCl}_3$ , 471 MHz):  $\delta$  (ppm) 67.7 (d,  $J = 152.9$  Hz, 4F), 79.4-80.7 (m, 1F); IR spectrum (neat) ( $\text{cm}^{-1}$ ) = 3272, 1597, 1497, 1398, 1337, 1161, 1092, 961, 886, 863, 719, 662.

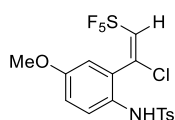**(E)-N-(2-(1-Chloro-2-(pentafluoro- $\lambda^6$ -sulfanyl)vinyl)-4-methoxyphenyl)-4-toluenesulfonamide 2c**

Prepared according to **GP2** from *N*-(2-ethynylphenyl)-4-toluenesulfonamide **1c** (200 mg, 0.66 mmol, 1 equiv.). The NMR shows 77% conv. and the reaction was purified by silica gel column chromatography (Petroleum ether/EtOAc 95/5 to 90/10) affording **2c** (83 mg, 27 %) as an orange oil.

**$^1\text{H-NMR}$  ( $\text{CDCl}_3$ , 500 MHz):**  $\delta$  (ppm) = 2.37 (s, 3H), 3.75 (s, 3H), 6.38 (bs, 1H), 6.65 (d,  $J$  = 2.6 Hz, 1H), 6.91 (dd,  $J$  = 9.1 Hz,  $J$  = 3.0 Hz, 1H), 6.96 (quint.,  $J$  = 7.4 Hz, 1H), 7.23 (d,  $J$  = 8.0 Hz, 2H), 7.57 (d,  $J$  = 9.1 Hz, 2H), 7.69 (d,  $J$  = 8.3 Hz, 2H);  **$^{13}\text{C}\{^1\text{H}\}$ -NMR ( $\text{CDCl}_3$ , 125 MHz):**  $\delta$  (ppm) = 21.7, 55.7, 114.2, 116.9, 123.7, 126.2, 127.6, 128.5, 129.7, 136.5, 138.8 (quint.,  $J$  = 6.5 Hz), 141.5 (quint.,  $J$  = 21.8 Hz), 144.3, 156.6;  **$^{19}\text{F}\{^1\text{H}\}$ -NMR ( $\text{CDCl}_3$ , 471 MHz):**  $\delta$  (ppm) = 67.71 (d,  $J$  = 152.8 Hz, 4F), 79.3-80.6 (m, 1F); **IR spectrum (neat)** ( $\text{cm}^{-1}$ ) = 3264, 2842, 1599, 1494, 1338, 1158, 1091, 959, 840, 644.

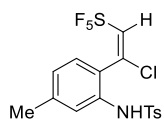**(E)-N-(2-(1-Chloro-2-(pentafluoro- $\lambda^6$ -sulfanyl)vinyl)-5-methylphenyl)-4-toluenesulfonamide 2d**

Prepared according to **GP2** from *N*-(2-ethynyl-5-methylphenyl)-4-toluenesulfonamide **1d** (120 mg, 0.42 mmol, 1 equiv.). No purification needed and **2d** (195 mg, Quant.) was obtained as an orange/yellow solid.

**$^1\text{H-NMR}$  ( $\text{CDCl}_3$ , 500 MHz):**  $\delta$  (ppm) = 2.34 (s, 3H), 2.37 (s, 3H), 6.57 (bs, 1H), 6.91 (dd,  $J$  = 7.9 Hz,  $J$  = 1.6 Hz, 1H), 6.95 - 7.02 (m, 2H), 7.25 (d,  $J$  = 8.1 Hz, 2H), 7.50 (d,  $J$  = 1.5 Hz, 1H), 7.75 (d,  $J$  = 8.4 Hz, 2H);  **$^{13}\text{C}\{^1\text{H}\}$ -NMR ( $\text{CDCl}_3$ , 125 MHz):**  $\delta$  (ppm) = 21.7, 21.8, 120.3, 122.7, 125.1, 127.6, 128.9, 129.8, 133.5, 136.2, 139.2 (quint.,  $J$  = 6.4 Hz), 141.9 (quint.,  $J$  = 21.7 Hz), 142.2, 144.5;  **$^{19}\text{F}\{^1\text{H}\}$ -NMR ( $\text{CDCl}_3$ , 471 MHz):**  $\delta$  (ppm) = 67.6 (d,  $J$  = 153.0 Hz, 4F), 79.4-80.7 (m, 1F); **IR spectrum (neat)** ( $\text{cm}^{-1}$ ) = 3287, 3080, 1639, 1504, 1402, 1332, 1167, 1157, 1094, 916, 852, 714, 643.

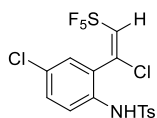**(E)-N-(4-Chloro-2-(1-chloro-2-(pentafluoro- $\lambda^6$ -sulfanyl)vinyl)phenyl)-4-toluenesulfonamide 2e**

Prepared according to **GP2** from *N*-(4-chloro-2-ethynylphenyl)-4-toluenesulfonamide **1e** (300 mg, 1.0 mmol, 1 equiv.). No purification needed and **2e** (358 mg, 78 % conv.) was obtained as orange solid.

**$^1\text{H-NMR}$  ( $\text{CDCl}_3$ , 500 MHz):**  $\delta$  (ppm) = 2.38 (s, 3H), 6.76 (s, 1H), 7.02 (quint.,  $J$  = 7.4 Hz, 1H), 7.11 (d,  $J$  = 2.1 Hz, 1H), 7.26 (d,  $J$  = 8.0 Hz, 2H), 7.33 (dd,  $J$  = 8.9 Hz,  $J$  = 2.4 Hz, 1H), 7.66 (d,  $J$  = 8.9 Hz, 1H), 7.74 (d,  $J$  = 8.4 Hz, 2H);  **$^{13}\text{C}\{^1\text{H}\}$ -NMR ( $\text{CDCl}_3$ , 125 MHz):**  $\delta$  (ppm) = 21.7, 121.2, 126.9, 127.6, 128.8, 129.6, 129.9, 131.5, 132.4, 135.8, 137.1 (quint.,  $J$  = 6.4 Hz), 142.6 (quint.,  $J$  = 22.0 Hz), 144.9;  **$^{19}\text{F}\{^1\text{H}\}$ -NMR ( $\text{CDCl}_3$ , 471 MHz):**  $\delta$  (ppm) = 67.7 (d,  $J$  = 152.8 Hz, 4F), 78.8-80.1 (m, 1F); **IR spectrum (neat) ( $\text{cm}^{-1}$ )** = 3265, 3084, 1734, 1598, 1483, 1393, 1338, 1163, 1090, 948, 893, 849, 719, 646, 545.

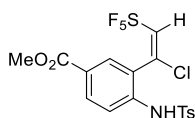**Methyl (E)-3-(1-chloro-2-(pentafluoro- $\lambda^6$ -sulfanyl)vinyl)-4-(4-toluenesulfonamido)benzoate 2f**

Prepared according to **GP2** from methyl 3-ethynyl-4-(4-toluenesulfonamido)benzoate **1f** (277 mg, 1.7 mmol). The NMR shows 88% conv., the reaction was purified by silica gel column chromatography (petroleum ether/EtOAc 90:10) and **2f** (210 mg, 37 %) was obtained as white powder.

**$^1\text{H-NMR}$  ( $\text{CDCl}_3$ , 500 MHz):**  $\delta$  (ppm) = 2.38 (s, 3H), 3.87 (s, 3H), 6.96 (bs, 1H), 7.08 (quint.,  $J$  = 7.3 Hz, 1H), 7.26 (d,  $J$  = 8.0 Hz, 2H), 7.74 (d,  $J$  = 8.8 Hz, 1H), 7.78 (d,  $J$  = 8.3 Hz, 2H), 7.82 (bs, 1H), 8.02 (dd,  $J$  = 8.8 Hz,  $J$  = 1.9 Hz, 1H);  **$^{13}\text{C}\{^1\text{H}\}$ -NMR ( $\text{CDCl}_3$ , 125 MHz):**  $\delta$  (ppm) = 21.7, 52.5, 118.0, 124.4, 125.6, 127.7, 130.0, 130.8, 132.9, 135.6, 137.6 (quint.,  $J$  = 6.5 Hz), 137.7, 142.8 (quint.,  $J$  = 22.0 Hz), 145.1, 165.6.  **$^{19}\text{F}\{^1\text{H}\}$ -NMR ( $\text{CDCl}_3$ , 471 MHz):**  $\delta$  (ppm) = 67.7 (d,  $J$  = 152.8 Hz, 4F), 78.7-80.0 (m, 1F); **IR spectrum (neat) ( $\text{cm}^{-1}$ )** = 3279, 3102, 1600, 1491, 1407, 1340, 1162, 1091, 931, 860, 844, 714, 663, 559.



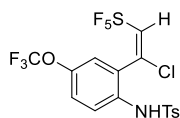

**(E)-N-(2-(1-chloro-2-(pentafluoro- $\lambda^6$ -sulfanyl)vinyl)-4-(trifluoromethoxy)phenyl)-4-methylbenzenesulfonamide **2g****

Prepared according to **GP2** from *N*-[2-ethynyl-4-(trifluoromethoxy)phenyl]-4-methylbenzene-1-sulfonamide **1g** (200 mg, 0.56 mmol, 1 equiv.). No purification needed and **2g** (290 mg, 100 % conv.) was obtained as orange sticky solid.

$^1\text{H-NMR}$  ( $\text{CDCl}_3$ , 500 MHz):  $\delta$  (ppm) = 2.39 (s, 3H), 6.78 (s, 1H), 7.02 (s, 1H), 7.03 (quint.,  $J = 7.2$  Hz, 1H), 7.23 (dd,  $J = 9.1$  Hz,  $J = 2.3$  Hz, 1H), 7.27 (d,  $J = 8.1$  Hz, 2H), 7.72 (d,  $J = 9.1$  Hz, 1H), 7.75 (d,  $J = 8.3$  Hz, 2H);  $^{13}\text{C}\{^1\text{H}\}$ -NMR ( $\text{CDCl}_3$ , 125 MHz):  $\delta$  (ppm) = 21.7, 120.4 (q,  $J = 258.6$  Hz), 121.2, 122.0, 124.1, 126.6, 127.6, 130.0, 132.5, 135.9, 136.9 (quint.,  $J = 6.3$  Hz), 142.8 (quint.,  $J = 22.1$  Hz), 144.9 (q,  $J = 2.1$  Hz), 144.9;  $^{19}\text{F}\{^1\text{H}\}$ -NMR ( $\text{CDCl}_3$ , 471 MHz):  $\delta$  (ppm) = -58.4 (s, 3F), 67.6 (d,  $J = 152.6$  Hz, 4F), 78.6-79.9 (m, 1F); IR spectrum (neat) ( $\text{cm}^{-1}$ ) = 3272, 3086, 1738, 1598, 1494, 1403, 1253, 1155, 1091, 848, 647, 600, 564, 545.

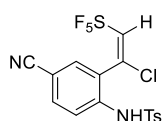

**(E)-N-(2-(1-chloro-2-(pentafluoro- $\lambda^6$ -sulfanyl)vinyl)-4-cyanophenyl)-4-methylbenzenesulfonamide **2h****

Prepared according to **GP2** from *N*-(4-cyano-2-ethynylphenyl)-4-methylbenzenesulfonamide **1h** (170 mg, 0.57 mmol, 1 equiv.). The NMR shows 78% conv., the reaction was purified by silica gel column chromatography (petroleum ether/EtOAc 95:5) and **2g** (121 mg, 46%) was obtained as white powder.

$^1\text{H-NMR}$  ( $\text{CDCl}_3$ , 500 MHz):  $\delta$  (ppm) = 2.40 (s, 3H), 7.09 (quint.,  $J = 7.3$  Hz, 1H), 7.30 (d,  $J = 8.0$  Hz, 2H), 7.42 (s, 1H), 7.62 (dd,  $J = 8.8$  Hz,  $J = 2.0$  Hz, 1H), 7.78 (d,  $J = 8.2$  Hz, 2H), 7.79 (d,  $J = 8.7$  Hz, 1H);  $^{13}\text{C}\{^1\text{H}\}$ -NMR ( $\text{CDCl}_3$ , 125 MHz):  $\delta$  (ppm) = 21.8, 107.4, 117.5, 118.6, 125.2, 127.6, 130.2, 133.0, 135.2, 135.3, 136.0 (quint.,  $J = 6.1$  Hz), 137.9, 143.6 (quint.,  $J = 22.3$  Hz), 145.5;  $^{19}\text{F}\{^1\text{H}\}$ -NMR ( $\text{CDCl}_3$ , 471 MHz):  $\delta$  (ppm) 67.6 (d,  $J = 152.8$  Hz, 4F), 78.5-79.8 (m, 1F); IR spectrum (neat) ( $\text{cm}^{-1}$ ) = 3216, 3039, 2242, 1649, 1603, 1490, 1402, 1170, 1155, 1090, 967, 879, 846, 814, 721, 666, 569, 547.

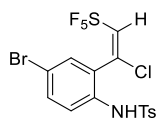**(E)-N-(4-Bromo-2-(1-chloro-2-(pentafluoro- $\lambda^6$ -sulfanyl)vinyl)phenyl)-4-toluenesulfonamide 2i**

Prepared according to **GP2** from *N*-(4-bromo-2-ethynylphenyl)-4-toluenesulfonamide **1i** (150 mg, 0.43 mmol, 1 equiv.). No purification needed and **2i** (220 mg, 100 %) was obtained as yellow pale solid.

**$^1\text{H-NMR}$  ( $\text{CDCl}_3$ , 500 MHz):**  $\delta$  (ppm) = 2.39 (s, 3H), 6.59 (s, 1H), 7.02 (quint.,  $J$  = 7.3 Hz, 1H), 7.25 (s, 1H), 7.26 (d,  $J$  = 8.0 Hz, 2H), 7.48 (dd,  $J$  = 8.9 Hz,  $J$  = 2.2 Hz, 1H), 7.60 (d,  $J$  = 8.9 Hz, 1H), 7.73 (d,  $J$  = 8.3 Hz, 2H);  **$^{13}\text{C}\{^1\text{H}\}$ -NMR ( $\text{CDCl}_3$ , 125 MHz):**  $\delta$  (ppm) = 21.7, 116.9, 121.3, 127.0, 127.6, 130.0, 131.6, 132.9, 134.5, 135.8, 137.1 (quint.,  $J$  = 6.2 Hz), 142.6 (quint.,  $J$  = 22.0 Hz), 144.9;  **$^{19}\text{F}\{^1\text{H}\}$ -NMR ( $\text{CDCl}_3$ , 471 MHz):**  $\delta$  (ppm) = 67.7 (d,  $J$  = 152.8 Hz, 4F), 78.7-80.0 (m, 1F); **IR spectrum (neat)** ( $\text{cm}^{-1}$ ) = 3264, 2924, 1639, 1484, 1389, 1164, 1090, 942, 848, 811, 719, 646.

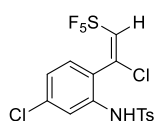**(E)-N-(5-Chloro-2-(1-chloro-2-(pentafluoro- $\lambda^6$ -sulfanyl)vinyl)phenyl)-4-toluenesulfonamide 2j**

Prepared according to **GP2** from *N*-(5-chloro-2-ethynylphenyl)-4-toluenesulfonamide **1j** (250 mg, 0.82 mmol, 1 equiv.) in DCM instead of EtOAc. The NMR shows 90% conv., no purification needed and **2j** (382 mg, 90 %) was obtained as an orange/yellow solid.

**$^1\text{H-NMR}$  ( $\text{CDCl}_3$ , 500 MHz):**  $\delta$  (ppm) = 2.39 (s, 3H), 6.78 (bs, 1H), 7.02 (quint.,  $J$  = 7.4 Hz, 1H), 7.05-7.06 (m, 2H), 7.28 (d,  $J$  = 8.2 Hz, 2H), 7.73 (d,  $J$  = 1.7 Hz, 1H), 7.77 (d,  $J$  = 8.4 Hz, 2H);  **$^{13}\text{C}\{^1\text{H}\}$ -NMR ( $\text{CDCl}_3$ , 125 MHz):**  $\delta$  (ppm) = 21.7, 119.6, 123.5, 124.3, 127.7, 130.0, 130.1, 135.0, 135.8, 137.7, 137.8 (quint.,  $J$  = 6.5 Hz), 142.6 (quint.,  $J$  = 21.9 Hz), 145.0;  **$^{19}\text{F}\{^1\text{H}\}$ -NMR ( $\text{CDCl}_3$ , 471 MHz):**  $\delta$  (ppm) = 67.0 (d,  $J$  = 152.4 Hz, 4F), 79.9 (quint.,  $J$  = 152.8 Hz, 1F); **IR spectrum (neat)** ( $\text{cm}^{-1}$ ) = 3282, 3084, 1736, 1594, 1487, 1387, 1335, 1163, 1086, 940, 847, 666, 641, 541.

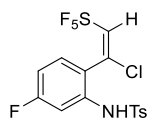

**(E)-N-(2-(1-Chloro-2-(pentafluoro- $\lambda^6$ -sulfanyl)vinyl)-5-fluorophenyl)-4-toluenesulfonamide 2k**

Prepared according to **GP2** from *N*-(2-ethynyl-5-fluorophenyl)-4-toluenesulfonamide **1k** (300 mg, 1.0 mmol, 1 equiv.). The NMR shows 100% conv., no purification needed and **2k** (369 mg, 79 %) was obtained as an orange solid.

**$^1\text{H-NMR}$  ( $\text{CDCl}_3$ , 500 MHz):**  $\delta$  (ppm) = 2.39 (s, 3H), 6.73 (bs, 1H), 6.79 (td,  $J$  = 8.2 Hz,  $J$  = 2.4 Hz, 1H), 7.03 (quint.,  $J$  = 7.3 Hz, 1H), 7.10 (dd,  $J$  = 8.4 Hz,  $J$  = 6.1 Hz, 1H), 7.28 (d,  $J$  = 8.5 Hz, 2H), 7.46 (dd,  $J$  = 10.6 Hz,  $J$  = 2.4 Hz, 1H), 7.77 (d,  $J$  = 8.4 Hz, 2H);  **$^{13}\text{C}\{^1\text{H}\}$ -NMR ( $\text{CDCl}_3$ , 125 MHz):**  $\delta$  (ppm) = 21.7, 106.9 (d,  $J$  = 27.6 Hz), 111.2 (d,  $J$  = 22.6 Hz), 120.8 (d,  $J$  = 3.6 Hz), 127.6, 130.0, 130.8 (d,  $J$  = 10.0 Hz), 135.7, 135.7 (d,  $J$  = 11.2 Hz), 138.0 (quint.,  $J$  = 6.4 Hz), 142.7 (quint.,  $J$  = 22.2 Hz), 145.0, 164.2 (d,  $J$  = 250.9 Hz);  **$^{19}\text{F}\{^1\text{H}\}$ -NMR ( $\text{CDCl}_3$ , 471 MHz):**  $\delta$  (ppm) = - 106.1 (s, 1F), 67.50 (d,  $J$  = 152.8 Hz, 4F), 79.0-80.3 (m, 1F); **IR spectrum (neat)** ( $\text{cm}^{-1}$ ) = 3261, 3097, 1594, 1494, 1422, 1336, 1165, 919, 841, 717, 640, 558.

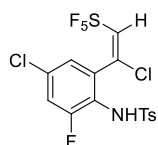

**(E)-N-(4-chloro-2-(1-chloro-2-(pentafluoro- $\lambda^6$ -sulfanyl)vinyl)-6-fluorophenyl)-4-methylbenzenesulfonamide 2l**

Prepared according to **GP2** from *N*-(4-chloro-2-ethynyl-6-fluorophenyl)-4-methylbenzene-1-sulfonamide **1l** (200 mg, 0.62 mmol, 1 equiv.). The NMR shows 16% conv., the reaction was purified by silica gel column chromatography (petroleum ether/EtOAc 90:10) and **2l** (20 mg, 7 %) was obtained as orange sticky solid.

**$^1\text{H-NMR}$  ( $\text{CDCl}_3$ , 500 MHz):**  $\delta$  (ppm) = 2.44 (s, 3H), 6.14 (s, 1H), 7.04 (quint.,  $J$  = 7.6 Hz, 1H), 7.12-7.16 (m, 2H), 7.30 (d,  $J$  = 8.0 Hz, 2H), 7.77 (d,  $J$  = 8.2 Hz, 2H);  **$^{13}\text{C}\{^1\text{H}\}$ -NMR ( $\text{CDCl}_3$ , 125 MHz):**  $\delta$  (ppm) = 21.8, 119.0 (d,  $J$  = 24.1 Hz), 120.8 (d,  $J$  = 15.4 Hz), 125.3, 127.5 (d,  $J$  = 1.3 Hz), 129.7, 133.8 (d,  $J$  = 10.3 Hz), 135.8 (d,  $J$  = 1.8 Hz), 137.0-137.2 (m), 137.2 (d,  $J$  = 1.2 Hz), 141.5 (quint.,  $J$  = 22.3 Hz), 144.4, 157.8 (d,  $J$  = 255.2 Hz);  **$^{19}\text{F}\{^1\text{H}\}$ -NMR ( $\text{CDCl}_3$ , 471 MHz):**  $\delta$  (ppm) = -113.4 (s, 1F), 68.0 (d,  $J$  = 152.7 Hz, 4F), 79.6-80.9 (m, 1F). **IR spectrum (neat)** ( $\text{cm}^{-1}$ ) = 3282, 3084, 1736, 1598, 1483, 1393, 1338, 1163, 1090, 948, 893, 847, 719, 646, 545.

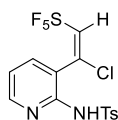**(E)-N-(3-(1-chloro-2-(pentafluoro- $\lambda^6$ -sulfanyl)vinyl)pyridin-2-yl)-4-methylbenzenesulfonamide 2o**

Prepared according to **GP2** from *N*-(3-ethynylpyridin-2-yl)-4-methylbenzenesulfonamide **1o** (170 mg, 0.62 mmol, 1 equiv.) in DCM instead of EtOAc. The NMR shows 44% conv., the reaction was purified by silica gel column chromatography (petroleum ether/EtOAc 90:10) and **2o** (40 mg, 15 %) was obtained as pale-yellow sticky solid.

**$^1\text{H-NMR}$  ( $\text{CDCl}_3$ , 500 MHz):**  $\delta$  (ppm) = 2.42 (s, 3H), 7.08 (quint.,  $J$  = 7.3 Hz, 1H), 7.30 (d,  $J$  = 8.2 Hz, 2H), 7.44 (d,  $J$  = 2.1 Hz, 1H), 7.97 (d,  $J$  = 8.3 Hz, 2H), 8.20 (s, 1H);  **$^{13}\text{C}\{^1\text{H}\}$ -NMR ( $\text{CDCl}_3$ , 125 MHz):**  $\delta$  (ppm) = 21.8, 117.1, 128.5, 129.5, 135.3 (quint.,  $J$  = 6.1 Hz), 136.6, 137.3, 142.8, 143.3 (quint.,  $J$  = 21.5 Hz), 144.6, 145.4, 148.4;  **$^{19}\text{F}\{^1\text{H}\}$ -NMR ( $\text{CDCl}_3$ , 471 MHz):**  $\delta$  (ppm) = 67.6 (d,  $J$  = 152.7 Hz), 79.5 (quint.,  $J$  = 152.9 Hz); **IR spectrum (neat)** ( $\text{cm}^{-1}$ ) = 3246, 3089, 2925, 1560, 1443, 1338, 1163, 1138, 1089, 958, 902, 841, 723, 646, 599, 560.

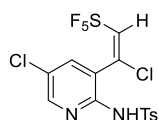**(E)-N-(5-chloro-3-(1-chloro-2-(pentafluoro- $\lambda^6$ -sulfanyl)vinyl)pyridin-2-yl)-4-methylbenzenesulfonamide 2p**

Prepared according to **GP2** from *N*-(5-chloro-3-ethynylpyridin-2-yl)-4-methylbenzenesulfonamide **1p** (205.6 mg, 0.67 mmol, 1 equiv.) in DCM instead of EtOAc. The NMR shows 33% conv., the reaction was purified by silica gel column chromatography (petroleum ether/EtOAc 90:10) and **2p** (41 mg, 13 %) was obtained as pale yellow solid.

**$^1\text{H-NMR}$  ( $\text{CDCl}_3$ , 500 MHz):**  $\delta$  (ppm) = 2.42 (s, 3H), 7.10 (quint.,  $J$  = 7.2 Hz, 1H), 7.30 (d,  $J$  = 8.1 Hz, 2H), 7.44 (d,  $J$  = 2.1 Hz, 1H), 7.96 (d,  $J$  = 8.3 Hz, 2H), 8.21 (d,  $J$  = 2.1 Hz, 1H);  **$^{13}\text{C}\{^1\text{H}\}$ -NMR ( $\text{CDCl}_3$ , 125 MHz):**  $\delta$  (ppm) = 21.8, 119.0, 128.7, 129.5, 135.3 (quint.,  $J$  = 6.4 Hz), 136.4, 137.1, 143.4 (quint.,  $J$  = 22.8 Hz), 144.7, 145.2, 148.6, 153.2;  **$^{19}\text{F}\{^1\text{H}\}$ -NMR ( $\text{CDCl}_3$ , 471 MHz):**  $\delta$  (ppm) = 67.6 (d,  $J$  = 152.7 Hz), , 79.4 (quint.,  $J$  = 154.0 Hz); **IR spectrum (neat)** ( $\text{cm}^{-1}$ ) = 3252, 1687, 1560, 1445, 1339, 1167, 1140, 1090, 962, 905, 846, 724, 645, 564.

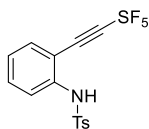***N*-(2-((Pentafluoro- $\lambda^6$ -sulfanyl)ethynyl)phenyl)-4-toluenesulfonamide **3a****

Prepared according to **GP4** from (*E*)-*N*-(2-(1-chloro-2-(pentafluoro- $\lambda^6$ -sulfanyl)vinyl)phenyl)-4-toluenesulfonamide **2a** (91.1 mg, 0.21 mmol). No purification needed and **3a** (84 mg, quant. yield) was obtained as a yellow powder.

**$^1\text{H-NMR}$  ( $\text{CDCl}_3$ , 500 MHz):**  $\delta$  (ppm) = 2.38 (s, 3H), 6.77 (bs, 1H), 7.16 (td,  $J = 7.7$  Hz,  $J = 1.1$  Hz, 1H), 7.21-7.23 (m, 2H), 7.41 (dd,  $J = 7.9$  Hz,  $J = 1.6$  Hz, 1H), 7.48 (ddd,  $J = 8.5$  Hz,  $J = 7.5$  Hz,  $J = 1.6$  Hz, 1H), 7.59-7.61 (m, 2H), 7.71 (dd,  $J = 8.3$  Hz,  $J = 1.1$  Hz, 1H);  **$^{13}\text{C}\{^1\text{H}\}$ -NMR ( $\text{CDCl}_3$ , 125 MHz):**  $\delta$  (ppm) = 21.7, 73.4 (quint.,  $J = 8.0$  Hz), 95.1 (quint.,  $J = 42.2$  Hz), 109.8, 122.8, 125.6, 127.3, 130.0, 132.9, 133.6, 135.7, 139.1, 144.7;  **$^{19}\text{F}\{^1\text{H}\}$ -NMR ( $\text{CDCl}_3$ , 471 MHz):**  $\delta$  (ppm) = 74.8-76.2 (m, 1F), 83.7 (d,  $J = 153.2$  Hz, 4F); **IR spectrum (neat)** ( $\text{cm}^{-1}$ ) = 3251, 2924, 2222, 1599, 1488, 1332, 1170, 1091, 868, 787, 758, 668; **HRMS (ESI):**  $m/z$  calculated for  $\text{C}_{15}\text{H}_{13}\text{F}_5\text{NO}_2\text{S}_2^{+}$  [ $\text{M}+\text{H}$ ] $^{+}$  398.0302, found 398.0281.

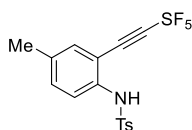***N*-(4-Methyl-2-((pentafluoro- $\lambda^6$ -sulfanyl)ethynyl)phenyl)-4-toluenesulfonamide **3b****

Prepared according to **GP4** from (*E*)-*N*-(2-(1-chloro-2-(pentafluoro- $\lambda^6$ -sulfanyl)vinyl)-4-methylphenyl)-4-toluenesulfonamide **2b** (100 mg, 0.22 mmol). No purification needed and **3b** (71 mg, 77 %) was obtained as a sticky brown powder.

**$^1\text{H-NMR}$  ( $\text{CDCl}_3$ , 400 MHz):**  $\delta$  (ppm) = 2.29 (s, 3H), 2.38 (s, 3H), 6.62 (bs, 1H), 7.20-7.22 (m, 3H), 7.29 (dd,  $J = 8.4$  Hz,  $J = 2.1$  Hz, 1H), 7.57 (d,  $J = 8.3$  Hz, 2H), 7.60 (d,  $J = 8.4$  Hz, 1H);  **$^{13}\text{C}\{^1\text{H}\}$ -NMR ( $\text{CDCl}_3$ , 125 MHz):**  $\delta$  (ppm) = 20.7, 21.7, 73.7 (quint.,  $J = 7.9$  Hz), 94.6 (quint.,  $J = 44.1$  Hz), 110.2, 123.6, 127.3, 129.9, 133.7, 133.8, 135.7, 135.9, 136.5, 144.5;  **$^{19}\text{F}\{^1\text{H}\}$ -NMR ( $\text{CDCl}_3$ , 471 MHz):**  $\delta$  (ppm) = 75.1-76.5 (m, 1F), 93.5-83.9 (m, 4F); **IR spectrum (neat)** ( $\text{cm}^{-1}$ ) = 3246, 2927, 2210, 1600, 1495, 1394, 1345, 1169, 1092, 957, 874, 677, 582, 550, 525; **HRMS (ESI):**  $m/z$  calculated for  $\text{C}_{16}\text{H}_{14}\text{F}_5\text{NO}_2\text{S}_2^{+}$  [ $\text{M}$ ] $^{+}$  411.0381, found 411.0384.

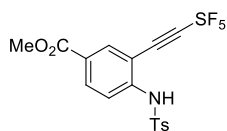

**methyl 4-((4-methylphenyl)sulfonamido)-3-((pentafluoro- $\lambda^6$ -sulfanyl)ethynyl)benzoate **3f****

Prepared according to **GP4** from methyl (*E*)-3-(1-chloro-2-(pentafluoro- $\lambda^6$ -sulfanyl)vinyl)-4-((4-methylphenyl)sulfonamido)benzoate **2g** (52 mg, 0.106 mmol). No purification needed and **3g** (47 mg, 98 %) was obtained as an orange powder.

**$^1\text{H-NMR}$  ( $\text{CDCl}_3$ , 500 MHz):**  $\delta$  (ppm) = 2.39 (s, 3H), 3.90 (s, 3H), 7.08 (bs, 1H), 7.24-7.27 (m, 2H), 7.67 (d,  $J$  = 8.4 Hz, 2H), 7.74 (dd,  $J$  = 8.6 Hz,  $J$  = 0.7 Hz, 1H), 8.07-8.10 (m, 2H);  **$^{13}\text{C}\{^1\text{H}\}$ -NMR ( $\text{CDCl}_3$ , 125 MHz):**  $\delta$  (ppm) = 21.7, 52.7, 72.3 (quint.,  $J$  = 8.0 Hz), 95.8 (quint.,  $J$  = 44.6 Hz), 108.5, 120.3, 126.8, 127.3, 130.2, 133.9, 135.3, 135.5, 142.8, 145.2, 165.1;  **$^{19}\text{F}\{^1\text{H}\}$ -NMR ( $\text{CDCl}_3$ , 471 MHz):**  $\delta$  (ppm) = 73.9-75.4 (m, 1F), 83.6 (d,  $J$  = 161.2 Hz, 4F); **IR spectrum (neat)** ( $\text{cm}^{-1}$ ) = 3260, 2959, 2215, 1596, 1582, 1500, 1435, 1303, 1279, 0188, 940, 870, 843, 665, 580, 549; **HRMS (ESI):**  $m/z$  calculated for  $\text{C}_{17}\text{H}_{14}\text{F}_5\text{NO}_4\text{S}_2^{+}$   $[\text{M}]^{+}$  456.0357, found 456.0393.

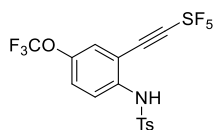

**4-methyl-N-(2-((pentafluoro- $\lambda^6$ -sulfanyl)ethynyl)-4-(trifluoromethoxy)phenyl)benzenesulfonamide **3g****

Prepared according to **GP4** from *N*-{2-[(*E*)-1-chloro-2-(pentafluoro- $\lambda^6$ -sulfanyl)ethenyl]-4-(trifluoromethoxy)phenyl}-4-methylbenzene-1-sulfonamide **2g** (80 mg, 0.15 mmol). No purification needed and **3g** (73 mg, 100%) was obtained as brown sticky powder.

**$^1\text{H-NMR}$  ( $\text{CDCl}_3$ , 500 MHz):**  $\delta$  (ppm) = 2.40 (s, 3H), 6.84 (bs, 1H), 7.25 (d,  $J$  = 8.0 Hz, 2H), 7.26-7.28 (m, 1H), 7.34 (dd,  $J$  = 9.0 Hz,  $J$  = 2.7 Hz, 1H), 7.60 (d,  $J$  = 8.4 Hz, 2H), 7.74 (d,  $J$  = 9.1 Hz, 1H);  **$^{13}\text{C}\{^1\text{H}\}$ -NMR ( $\text{CDCl}_3$ , 125 MHz):**  $\delta$  (ppm) = 21.7, 71.7 (quint.  $J$  = 8.6 Hz), 95.5 (quint.  $J$  = 43.5 Hz), 111.3, 120.3 (q,  $J$  = 258.9 Hz), 124.6, 125.6, 125.7, 127.2, 130.1, 135.5, 137.8, 145.0, 146.0 (q,  $J$  = 2.3 Hz);  **$^{19}\text{F}\{^1\text{H}\}$ -NMR ( $\text{CDCl}_3$ , 471 MHz):**  $\delta$  (ppm) = -58.2 (s, 3F), 73.7-75.0 (m, 1F), 83.4 (d,  $J$  = 161.5 Hz); **IR spectrum (neat)** ( $\text{cm}^{-1}$ ) = 3255, 2222, 1654, 1598, 1401, 1342, 1254, 1219, 1160, 988, 851, 813, 770, 663, 578, 544; **HRMS (ESI):**  $m/z$  calculated for  $\text{C}_{16}\text{H}_{11}\text{F}_8\text{NO}_3\text{S}_2^{+}$   $[\text{M}]^{+}$  481.0047, found 481.0067.

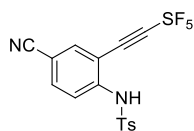**N-(4-cyano-2-((pentafluoro- $\lambda^6$ -sulfanyl)ethynyl)phenyl)-4-methylbenzenesulfonamide 3h**

Prepared according to **GP4** from N-{2-[(E)-1-chloro-2-(pentafluoro- $\lambda^6$ -sulfanyl)ethenyl]-4-cyanophenyl}-4-methylbenzene-1-sulfonamide **2h** (60 mg, 0.13 mmol). No purification needed and **3h** (57 mg, quant. yield) was obtained as brown oil.

**$^1\text{H-NMR}$  ( $\text{CDCl}_3$ , 500 MHz):**  $\delta$  (ppm) = 2.41 (s, 3H), 7.27 (bs, 1H), 7.29 (d,  $J$  = 8.2 Hz, 2H), 7.67-7.72 (m, 3H), 7.73 (d,  $J$  = 1.9 Hz, 1H), 7.78 (d,  $J$  = 8.8 Hz, 1H);  **$^{13}\text{C}\{^1\text{H}\}$ -NMR ( $\text{CDCl}_3$ , 125 MHz):**  $\delta$  (ppm) = 21.8, 70.8 (quint.,  $J$  = 7.5 Hz), 96.8 (quint.,  $J$  = 42.9 Hz), 108.7, 109.2, 116.9, 120.6, 127.3, 130.3, 135.4, 135.9, 137.4, 142.9, 145.5;  **$^{19}\text{F}\{^1\text{H}\}$ -NMR ( $\text{CDCl}_3$ , 471 MHz):**  $\delta$  (ppm) = 73.7 (quint.,  $J$  = 163.6 Hz, 1F), 83.5 (d,  $J$  = 161.5 Hz, 4F); **IR spectrum (neat)** ( $\text{cm}^{-1}$ ) = 3181, 2961, 2246, 2217, 1607, 1494, 1402, 1350, 1263, 1166, 1090, 963, 880, 848, 842, 661, 545; **HRMS (ESI):**  $m/z$  calculated for  $\text{C}_{16}\text{H}_{11}\text{F}_5\text{N}_2\text{O}_2\text{S}_2^{+}$  [ $\text{M}$ ] $^{+}$  422.0182, found 422.189.

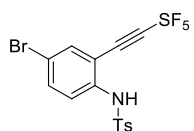**N-(4-bromo-2-((pentafluoro- $\lambda^6$ -sulfanyl)ethynyl)phenyl)-4-methylbenzenesulfonamide 3i**

Prepared according to **GP4** from N-{4-bromo-2-[(E)-1-chloro-2-(pentafluoro- $\lambda^6$ -sulfanyl)ethenyl]phenyl}-4-methylbenzene-1-sulfonamide **2i** (18 mg, 0.035 mmol). No purification needed and **3i** (17 mg, quant. yield) was obtained as brown solid.

**$^1\text{H-NMR}$  ( $\text{CDCl}_3$ , 500 MHz):**  $\delta$  (ppm) = 2.39 (s, 3H), 6.77 (bs, 1H), 7.24 (d,  $J$  = 8.1 Hz, 2H), 7.54 (d,  $J$  = 1.6 Hz, 1H), 7.58-7.61 (m, 4H);  **$^{13}\text{C}\{^1\text{H}\}$ -NMR ( $\text{CDCl}_3$ , 125 MHz):**  $\delta$  (ppm) = 21.7, 71.8 (quint.,  $J$  = 7.2 Hz), 95.6 (quint.,  $J$  = 45.2 Hz), 111.7, 118.4, 124.4, 127.2, 130.1, 135.5, 135.8, 135.9, 138.2, 145.0;  **$^{19}\text{F}\{^1\text{H}\}$ -NMR ( $\text{CDCl}_3$ , 471 MHz):**  $\delta$  (ppm) = 73.4-76.1 (m, 1F), 83.5 (d,  $J$  = 161.1 Hz, 4F); **IR spectrum (neat)** ( $\text{cm}^{-1}$ ) = 2962, 2222, 1598, 1482, 1387, 1338, 1165, 1089, 872, 811, 663, 601, 579, 542; **HRMS (ESI):**  $m/z$  calculated for  $\text{C}_{15}\text{H}_{12}\text{BrF}_5\text{NO}_2\text{S}_2^{+}$  [ $\text{M}+\text{H}$ ] $^{+}$  475.9408, found 475.9384.

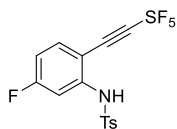**N-(5-Fluoro-2-((pentafluoro- $\lambda^6$ -sulfanyl)ethynyl)phenyl)-4-toluenesulfonamide 3k**

Prepared according to **GP4** from (*E*)-*N*-(2-(1-chloro-2-(pentafluoro- $\lambda^6$ -sulfanyl)vinyl)-5-fluorophenyl)-4-toluenesulfonamide **2k** (100 mg, 0.22 mmol). No purification needed and **3k** (86.4 mg, 94 %) was obtained as a brown powder.

**$^1\text{H-NMR}$  ( $\text{CDCl}_3$ , 400 MHz):**  $\delta$  (ppm) = 2.40 (s, 3H), 6.83 (bs, 1H), 6.85 (ddd,  $J = 8.6$  Hz,  $J = 7.8$  Hz,  $J = 2.5$  Hz, 1H), 7.26 (d,  $J = 8.1$  Hz, 2H), 7.41 (dd,  $J = 8.7$  Hz,  $J = 5.9$  Hz, 1H), 7.45 (dd,  $J = 10.1$  Hz,  $J = 2.5$  Hz, 1H), 7.66 (d,  $J = 8.4$  Hz, 2H);  **$^{13}\text{C}\{^1\text{H}\}$ -NMR ( $\text{CDCl}_3$ , 125 MHz):**  $\delta$  (ppm) = 21.7, 72.7 (quint.,  $J = 7.4$  Hz), 95.4 (quint.,  $J = 42.8$  Hz), 104.9, 109.4 (d,  $J = 27.1$  Hz), 113.0 (d,  $J = 22.8$  Hz), 127.3, 130.2, 135.4 (d,  $J = 10.2$  Hz), 135.5, 141.4 (d,  $J = 12.4$  Hz), 145.1, 164.9 (d,  $J = 255.3$  Hz);  **$^{19}\text{F}\{^1\text{H}\}$ -NMR ( $\text{CDCl}_3$ , 471 MHz):**  $\delta$  (ppm) = -101.3 (1F), 74.6-75.9 (m, 1F), 83.6-84.0 (m, 4F); **IR spectrum (neat)** ( $\text{cm}^{-1}$ ) = 3211, 2222, 1607, 1500, 1335, 1174, 1159, 1090, 986, 872, 795, 583; **HRMS (ESI):**  $m/z$  calculated for  $\text{C}_{15}\text{H}_{11}\text{F}_6\text{NO}_2\text{S}_2^{+}$  [M] $^{+}$  415.0130, found 415.0146.

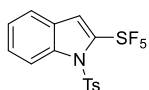**N-Tosyl-2-(pentafluoro- $\lambda^6$ -sulfanyl)-1H-indole 4a**

Prepared according to **GP5** from 4-methyl-*N*-(2-[2-(pentafluoro- $\lambda^6$ -sulfanyl)ethynyl]phenyl)benzene-1-sulfonamide **3a** (20 mg, 0.05 mmol). The reaction afforded a mixture of *N*-Ts and *N*-H-indole in a ratio 96:4 **4a:5a**. It was purified by silica gel column chromatography (Petroleum ether/EtOAc, 90/10 to 80/20) affording **4a** (16 mg, 80%) as a slightly yellow solid.

**$^1\text{H-NMR}$  ( $\text{CDCl}_3$ , 500 MHz):**  $\delta$  (ppm) = 2.31 (s, 3H), 7.12 (d,  $J = 8.2$  Hz, 2H), 7.31-7.35 (m, 2H), 7.49-7.54 (m, 4H), 8.35 (d,  $J = 8.6$  Hz, 1H);  **$^{13}\text{C}\{^1\text{H}\}$ -NMR ( $\text{CDCl}_3$ , 125 MHz):**  $\delta$  (ppm) = 21.7, 117.9, 120.6 (quint.,  $J = 6.1$  Hz), 122.9, 125.3, 126.7, 127.0, 128.5, 129.7, 134.6, 138.8, 145.4, 148.2 (quint.,  $J = 25.3$  Hz);  **$^{19}\text{F}\{^1\text{H}\}$ -NMR ( $\text{CDCl}_3$ , 471 MHz):**  $\delta$  (ppm) = 74.8 (d,  $J = 152.4$  Hz, 4F), 79.7-81.0 (m, 1F); **IR spectrum (neat)** ( $\text{cm}^{-1}$ ) = 2930, 1600, 1387, 1180, 853, 840, 761, 652, 564; **HRMS (ESI):**  $m/z$  calculated for  $\text{C}_{15}\text{H}_{13}\text{F}_5\text{NO}_2\text{S}_2^{+}$  [M+H] $^{+}$  398.0302, found 398.0315.



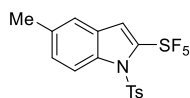**N-Tosyl-5-methyl-2-(pentafluoro- $\lambda^6$ -sulfanyl)-1H-indole 4b**

Prepared according to **GP5** from 4-methyl-*N*-(4-methyl-2-[2-(pentafluoro- $\lambda^6$ -sulfanyl)ethynyl]phenyl)benzene-1-sulfonamide **3b** (30 mg, 0.07 mmol). The reaction afforded a mixture of *N*-Ts and *N*-H-indole in a ratio 95:5 **4b**:**5b**. It was purified by preparative TLC (Petroleum ether/EtOAc 95/5) affording **4b** (21 mg, 70%) as a white powder.

**$^1\text{H-NMR}$  ( $\text{CDCl}_3$ , 500 MHz):**  $\delta$  (ppm) = 2.31 (s, 3H), 2.41 (s, 3H), 7.11 (d,  $J$  = 8.1 Hz, 2H), 7.26 (s, 1H), 7.29 (d,  $J$  = 0.6 Hz, 1H), 7.31 (dd,  $J$  = 8.8 Hz,  $J$  = 1.5 Hz, 1H), 7.50 (d,  $J$  = 8.4 Hz, 2H), 8.21 (d,  $J$  = 8.7 Hz, 1H);  **$^{13}\text{C}\{^1\text{H}\}$ -NMR ( $\text{CDCl}_3$ , 125 MHz):**  $\delta$  (ppm) = 21.3, 21.7, 117.6, 120.6 (quint.,  $J$  = 5.0 Hz), 122.5, 126.9, 127.0, 129.6, 130.0, 134.5, 135.2, 137.0, 145.3, 148.1 (quint.,  $J$  = 25.5 Hz);  **$^{19}\text{F}\{^1\text{H}\}$ -NMR ( $\text{CDCl}_3$ , 471 MHz):** 74.7 (d,  $J$  = 153.3 Hz, 4F), 79.9-81.2 (m, 1F); **IR spectrum (neat)** ( $\text{cm}^{-1}$ ) = 2925, 2850, 1593, 1385, 1178, 1152, 1105, 1084, 976, 843, 786, 671, 575, 542, 463; **HRMS (ESI):**  $m/z$  calculated for  $\text{C}_{16}\text{H}_{15}\text{F}_5\text{NO}_2\text{S}_2^{+}$  [ $\text{M}+\text{H}$ ] $^{+}$  412.0459, found 412.0449.

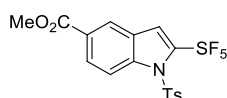**Methyl *N*-tosyl-2-(pentafluoro- $\lambda^6$ -sulfanyl)-1H-indole-5-carboxylate 4f**

Prepared according to **GP5** from methyl 4-(4-methylbenzenesulfonamido)-3-[2-(pentafluoro- $\lambda^6$ -sulfanyl)ethynyl]benzoate **3f** (43 mg, 0.094 mmol). The reaction afforded a mixture of *N*-Ts and *N*-indole in a ratio 71:29 **4f**:**5f**. It was purified by silica gel column chromatography affording **4f** (18 mg, 42%) as a colorless oil.

**$^1\text{H-NMR}$  ( $\text{CDCl}_3$ , 500 MHz):**  $\delta$  (ppm) = 2.32 (s, 3H), 3.94 (s, 3H), 7.15 (d,  $J$  = 8.1 Hz, 2H), 7.39 (s, 1H), 7.54 (d,  $J$  = 8.5 Hz, 2H), 8.17 (dd,  $J$  = 9.0 Hz, 1.8 Hz, 1H), 8.26 (d,  $J$  = 1.3 Hz, 1H), 8.41 (d,  $J$  = 9.0 Hz, 1H);  **$^{13}\text{C}\{^1\text{H}\}$ -NMR ( $\text{CDCl}_3$ , 125 MHz):**  $\delta$  (ppm) = 21.8, 52.6, 117.6, 119.8 (quint.,  $J$  = 6.5 Hz), 125.0, 126.3, 127.0, 127.3, 129.2, 129.9, 134.6, 141.0, 145.9, 148.7-149.5 (m), 166.5;  **$^{19}\text{F}\{^1\text{H}\}$ -NMR ( $\text{CDCl}_3$ , 471 MHz):**  $\delta$  (ppm) = 74.7-75.1 (m, 4F), 78.5-80.1 (m, 1F); **IR spectrum (neat)** ( $\text{cm}^{-1}$ ) = 2958, 1720, 1614, 1597, 1432, 1596, 1322, 1279, 1263, 1130, 1089, 993, 837, 785, 665, 570, 541; **HRMS (ESI):**  $m/z$  calculated for  $\text{C}_{17}\text{H}_{15}\text{F}_5\text{NO}_4\text{S}_2^{+}$  [ $\text{M}+\text{H}$ ] $^{+}$  456.0357, found 456.0383.

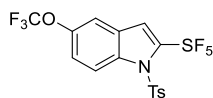**N-Tosyl-5-(trifluoromethoxy)-2-(pentafluoro- $\lambda^6$ -sulfanyl)-1H-indole 4g**

Prepared according to **GP5** from 4-methyl-*N*-(2-((pentafluoro- $\lambda^6$ -sulfaneyl)ethynyl)-4-(trifluoromethoxy)phenyl)benzenesulfonamide **3g** (38.5 mg, 0.08 mmol). The reaction afforded a mixture of *N*-H and *N*-Ts-indole in a ratio 79:21 **4g:5g** of. It was purified by preparative TLC (Petroleum ether/EtOAc 90/10) affording **4g** (25 mg, 65%) as a white powder.

**$^1\text{H-NMR}$  ( $\text{CDCl}_3$ , 500 MHz):**  $\delta$  (ppm) = 2.34 (s, 3H), 7.17 (d,  $J$  = 8.1 Hz, 2H), 7.33 (s, 1H), 7.36 (dd,  $J$  = 9.3 Hz,  $J$  = 1.8 Hz, 1H), 7.40 (s, 1H), 7.53 (d,  $J$  = 8.5 Hz, 2H), 8.40 (d,  $J$  = 9.3 Hz, 1H);  **$^{13}\text{C}\{^1\text{H}\}$ -NMR ( $\text{CDCl}_3$ , 125 MHz):**  $\delta$  (ppm) = 21.8, 114.6, 119.2 (quint.,  $J$  = 6.3 Hz), 119.3, 120.6 (q,  $J$  = 258.0 Hz), 121.8, 127.0, 127.2, 129.9, 134.6, 136.6, 145.9, 146.4, 149.5 (quint.,  $J$  = 24.9 Hz);  **$^{19}\text{F}\{^1\text{H}\}$ -NMR ( $\text{CDCl}_3$ , 471 MHz):**  $\delta$  (ppm) = -58.1 (s, 3F), 74.5-74.9 (m, 4F), 78.6-79.9 (m, 1F); **IR spectrum (neat)** ( $\text{cm}^{-1}$ ) = 3145, 2925, 1596, 1531, 1449, 1392, 1256, 1221, 1150, 1122, 1087, 1001, 851, 799, 781, 741, 668, 572, 542; **HRMS (ESI):**  $m/z$  calculated for  $\text{C}_{16}\text{H}_{12}\text{F}_8\text{NO}_3\text{S}_2^{+}$   $[\text{M}+\text{H}]^{+}$  482.0125, found 482.0137.

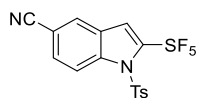**N-tosyl-2-(pentafluoro- $\lambda^6$ -sulfanyl)-1H-indole-5-carbonitrile 4h**

Prepared according to **GP5** from *N*-(4-cyano-2-((pentafluoro- $\lambda^6$ -sulfaneyl)ethynyl)phenyl)-4-methylbenzenesulfonamide **3h** (38 mg, 0.09 mmol). The reaction afforded a mixture of *N*-Ts and *N*-indole in a ratio 50:50 **4h:5h**. It was purified by silica gel column chromatography affording **4h** (8 mg, 21%) as a colorless oil.

**$^1\text{H-NMR}$  ( $\text{CDCl}_3$ , 500 MHz):**  $\delta$  (ppm) = 2.35 (s, 3H), 7.20 (d,  $J$  = 8.1 Hz, 2H), 7.38 (s, 1H), 7.55 (d,  $J$  = 8.6 Hz, 2H), 7.74 (d,  $J$  = 9.0 Hz,  $J$  = 1.7 Hz, 1H), 7.91 (d,  $J$  = 1.7 Hz, 1H), 8.50 (d,  $J$  = 8.9 Hz, 1H);  **$^{13}\text{C}\{^1\text{H}\}$ -NMR ( $\text{CDCl}_3$ , 125 MHz):**  $\delta$  (ppm) = 21.8, 109.1, 118.1 (quint.,  $J$  = 6.1 Hz), 118.4, 118.7, 126.4, 127.0, 127.7, 130.1, 130.7, 134.6, 140.0, 146.3, 149.3-150.3 (m);  **$^{19}\text{F}\{^1\text{H}\}$ -NMR ( $\text{CDCl}_3$ , 471 MHz):**  $\delta$  (ppm) = 74.8-75.3 (m, 4F), 77.8-79.2 (m, 1F); **IR spectrum (neat)** ( $\text{cm}^{-1}$ ) = 3133, 2919, 2850, 2230, 1597, 1391, 1194, 1117, 1084, 989, 880, 853, 828, 788, 745, 671, 573, 544; **HRMS (ESI):**  $m/z$  calculated for  $\text{C}_{16}\text{H}_{12}\text{F}_5\text{N}_2\text{O}_2\text{S}_2^{+}$   $[\text{M}+\text{H}]^{+}$  423.0255, found 423.0273.

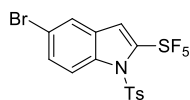**N-Tosyl-5-bromo-2-(pentafluoro- $\lambda^6$ -sulfanyl)-1H-indole 4i**

Prepared according to **GP5** from *N*-(4-bromo-2-((pentafluoro- $\lambda^6$ -sulfaneyl)ethynyl)phenyl)-4-methylbenzenesulfonamide **3i** (12 mg, 0.025 mmol). The reaction afforded a mixture of *N*-Ts- and *N*-H indole in a ratio 74:26 **4i**:**5i**. It was purified by preparative TLC (Petroleum ether/EtOAc 90/10) affording **4i** (7 mg, 58%) as a white powder.

**$^1\text{H-NMR}$  ( $\text{CDCl}_3$ , 500 MHz):**  $\delta$  (ppm) = 2.34 (s, 3H), 7.16 (d,  $J = 7.8$  Hz, 2H), 7.26 (s, 1H), 7.51 (d,  $J = 8.5$  Hz, 2H), 7.59 (dd,  $J = 9.1$  Hz,  $J = 2.0$  Hz, 1H), 7.67 (d,  $J = 2.0$  Hz, 1H), 8.24 (d,  $J = 9.1$  Hz, 1H);  **$^{13}\text{C}\{^1\text{H}\}$ -NMR ( $\text{CDCl}_3$ , 125 MHz):**  $\delta$  (ppm) = 21.8, 118.7, 118.9 (quint.,  $J = 5.8$  Hz), 119.4, 125.4, 127.0, 128.2, 129.9, 131.4, 134.5, 137.3, 145.8, 149.0 (quint.,  $J = 26.1$  Hz);  **$^{19}\text{F}\{^1\text{H}\}$ -NMR ( $\text{CDCl}_3$ , 471 MHz):**  $\delta$  (ppm) = 74.6-75.0 (m, 4F), 78.8-80.1 (m, 1F); **IR spectrum (neat)** ( $\text{cm}^{-1}$ ) = 2963, 2922, 2851, 1738, 1463, 1385, 1260, 1180, 1066, 852, 810, 787, 703, 669, 574; **HRMS (ESI):**  $m/z$  calculated for  $\text{C}_{15}\text{H}_{12}\text{BrF}_5\text{N}_2\text{O}_2\text{S}_2^{**}$  [ $\text{M}+\text{H}$ ] $^{**}$  475.9408, found 475.9394.

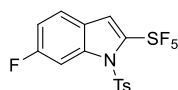**N-Tosyl-6-fluoro-2-(pentafluoro- $\lambda^6$ -sulfanyl)-1H-indole 4k**

Prepared according to **GP5** from *N*-(5-fluoro-2-[2-(pentafluoro- $\lambda^6$ -sulfanyl)ethynyl]phenyl)-4-methylbenzene-1-sulfonamide **3k** (35 mg, 0.08 mmol). The reaction afforded a mixture of *N*-Ts- and *N*-H indole in a ratio 69:31 **4k**:**5k**. It was purified by preparative TLC (Petroleum ether/EtOAc 90/10) affording **4k** (23 mg, 66%) as a white powder.

**$^1\text{H-NMR}$  ( $\text{CDCl}_3$ , 500 MHz):**  $\delta$  (ppm) = 2.33 (s, 3H), 7.10 (dt,  $J = 8.7$  Hz,  $J = 2.3$  Hz, 1H), 7.16 (d,  $J = 8.1$  Hz, 2H), 7.31 (s, 1H), 7.49 (dd,  $J = 8.7$  Hz,  $J = 5.5$  Hz, 1H), 7.53 (d,  $J = 8.4$  Hz, 2H), 8.09 (dd,  $J = 10.5$  Hz,  $J = 2.3$  Hz, 1H);  **$^{13}\text{C}\{^1\text{H}\}$ -NMR ( $\text{CDCl}_3$ , 125 MHz):**  $\delta$  (ppm) = 21.7, 105.2 (d,  $J = 29.8$  Hz), 114.3 (d,  $J = 24.7$  Hz), 119.8 (quint.,  $J = 5.7$  Hz), 122.9 (d,  $J = 1.8$  Hz), 124.1 (d,  $J = 10.1$  Hz), 127.0, 129.9, 134.5, 139.2 (d,  $J = 12.7$  Hz), 145.8, 148.2 (quint.,  $J = 25.8$  Hz), 162.9 (d,  $J = 246.7$  Hz);  **$^{19}\text{F}\{^1\text{H}\}$ -NMR ( $\text{CDCl}_3$ , 471 MHz):**  $\delta$  (ppm) = -109.4 (s, 1F), 74.7-75.0 (m, 4F), 79.4-80.7 (m, 1F); **IR spectrum (neat)** ( $\text{cm}^{-1}$ ) = 3140, 2917, 2849, 1617, 1595, 1521, 1483, 1265, 1193, 1183, 1088, 964, 847, 806, 766, 670, 574; **HRMS (ESI):**  $m/z$  calculated for  $\text{C}_{15}\text{H}_{12}\text{F}_6\text{NO}_2\text{S}_2^{**}$  [ $\text{M}+\text{H}$ ] $^{**}$  416.0208, found 416.0205.

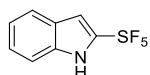

### 2-(Pentafluoro- $\lambda^6$ -sulfanyl)-1H-indole **5a**

Prepared according to **GP3** from crude (*E*)-*N*-(2-(1-chloro-2-(pentafluoro- $\lambda^6$ -sulfanyl)vinyl)phenyl)-4-toluenesulfonamide **2a** (86.8 mg, 0.2 mmol). The NMR shows 100% conv., the reaction was purified by silica gel column chromatography (petroleum ether/EtOAc 90:10) affording **5a** (31 mg, 65 % over 2 steps) as yellow powder.

**$^1\text{H-NMR}$  ( $\text{CDCl}_3$ , 500 MHz):**  $\delta$  (ppm) = 6.95 (s, 1H), 7.22 (dt,  $J = 7.1$  Hz,  $J = 0.9$  Hz, 1H), 7.37 (t,  $J = 8.1$  Hz, 1H), 7.43 (dd,  $J = 8.3$ , 0.7 Hz, 1H), 7.69 (d,  $J = 8.0$  Hz, 1H), 8.61 (bs, 1H);  **$^{13}\text{C}\{^1\text{H}\}$ -NMR ( $\text{CDCl}_3$ , 125 MHz):**  $\delta$  (ppm) = 103.50 (quint.,  $J = 4.8$  Hz), 111.8, 121.7, 122.6, 125.4, 125.6, 134.0, 143.6 (quint.,  $J = 24.2$  Hz);  **$^{19}\text{F}\{^1\text{H}\}$ -NMR ( $\text{CDCl}_3$ , 471 MHz):**  $\delta$  (ppm) = 66.3 (d,  $J = 152.9$  Hz, 4F), 81.0-82.3 (m, 1F); **IR spectrum (neat)** ( $\text{cm}^{-1}$ ) = 3403, 2925, 2850, 1448, 1107, 955, 854, 822, 752, 571; **HRMS (ESI):**  $m/z$  calculated for  $\text{C}_8\text{H}_6\text{F}_5\text{NS}^{+\bullet}$  [ $\text{M}]^{+\bullet}$  243.0136, found 243.0141.

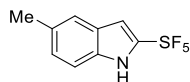

### 5-Methyl-2-(pentafluoro- $\lambda^6$ -sulfanyl)-1H-indole **5b**

Prepared according to **GP3** from crude (*E*)-*N*-(2-(1-Chloro-2-(pentafluoro- $\lambda^6$ -sulfanyl)vinyl)-4-methylphenyl)-4-toluenesulfonamide **2b** (89.6 mg, 0.2 mmol). The NMR shows 76% conv., the reaction was purified by preparative TLC (petroleum ether/EtOAc 90:10) affording **5b** (19.5 mg, 38 % over 2 steps) as white powder.

**$^1\text{H-NMR}$  ( $\text{CDCl}_3$ , 500 MHz):**  $\delta$  (ppm) 2.45 (s, 3H), 6.85 (s, 1H), 7.19 (d,  $J = 8.3$  Hz, 1H), 7.31 (d,  $J = 8.4$  Hz, 1H), 7.45 (s, 1H), 8.50 (bs, 1H);  **$^{13}\text{C}\{^1\text{H}\}$ -NMR ( $\text{CDCl}_3$ , 125 MHz):**  $\delta$  (ppm) = 21.6, 103.0 (quint.,  $J = 4.9$  Hz), 111.5, 121.9, 125.6, 127.4, 131.1, 132.3, 143.6 (quint.,  $J = 24.3$  Hz);  **$^{19}\text{F}\{^1\text{H}\}$ -NMR ( $\text{CDCl}_3$ , 471 MHz):**  $\delta$  (ppm) 66.23 (d,  $J = 152.9$  Hz, 4F), 81.3-82.6 (m, 1F); **IR spectrum (neat)** ( $\text{cm}^{-1}$ ) = 3394, 2923, 1733, 1523, 1450, 1152, 1108, 962, 882, 827, 792, 656; **HRMS (ESI):**  $m/z$  calculated for  $\text{C}_9\text{H}_8\text{F}_5\text{NS}^{+\bullet}$  [ $\text{M}]^{+\bullet}$  257.0292, found 257.0304.

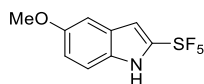

### 5-Methoxy-2-(pentafluoro- $\lambda^6$ -sulfanyl)-1H-indole **5c**

Prepared according to **GP3** from (*E*)-*N*-(2-(1-chloro-2-(pentafluoro- $\lambda^6$ -sulfanyl)vinyl)-4-methoxyphenyl)-4-toluenesulfonamide **2c** (92.8 mg, 0.2 mmol). The NMR shows 100% conv., the reaction was purified by preparative TLC (petroleum ether/EtOAc 90:10) affording **5c** (37 mg, 68 %) as a colorless oil.

**$^1\text{H-NMR}$  ( $\text{CDCl}_3$ , 500 MHz):**  $\delta$  (ppm) 3.85 (s, 3H), 6.86 (d,  $J = 2.2$  Hz, 1H), 7.03 (dd,  $J = 8.9$  Hz,  $J = 2.5$  Hz, 1H), 7.08 (d,  $J = 2.4$  Hz, 1H), 7.31 (dt,  $J = 9.0$  Hz,  $J = 0.8$  Hz, 1H), 8.53 (bs, 1H);  **$^{13}\text{C}\{^1\text{H}\}$ -NMR ( $\text{CDCl}_3$ , 125 MHz):**  $\delta$  (ppm) = 55.9, 103.0, 103.2 (quint.,  $J = 4.9$  Hz), 112.8, 116.9, 125.8, 129.0, 143.9 (quint.,  $J = 25.3$  Hz), 155.3;  **$^{19}\text{F}\{^1\text{H}\}$ -NMR ( $\text{CDCl}_3$ , 471 MHz):**  $\delta$  (ppm) 66.1 (d,  $J = 152.8$  Hz, 4F), 81.2-82.6 (m, 1F); **IR spectrum (neat)** ( $\text{cm}^{-1}$ ) 3296, 2938, 1629, 1520, 1458, 1293, 1199, 1163, 956, 827, 789, 751, 672; **HRMS (ESI):**  $m/z$  calculated for  $\text{C}_9\text{H}_8\text{F}_5\text{NOS}^{**}$   $[\text{M}]^{**}$  273.0241, found 273.0260.

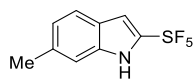

### 6-Methyl-2-(pentafluoro- $\lambda^6$ -sulfanyl)-1H-indole **5d**

Prepared according to **GP3** from crude (*E*)-*N*-(2-(1-Chloro-2-(pentafluoro- $\lambda^6$ -sulfanyl)vinyl)-5-methylphenyl)-4-toluenesulfonamide **2d** (67 mg, 0.15 mmol). The NMR shows 78% conv., the reaction was purified by preparative TLC (petroleum ether/EtOAc 90:10) affording **5d** (22 mg, 57 % over 2 steps) as a pale-yellow powder.

**$^1\text{H-NMR}$  ( $\text{CDCl}_3$ , 400 MHz):**  $\delta$  (ppm) = 2.49 (s, 3H), 6.89 (s, 1H), 7.06 (dd,  $J = 8.2$ , 0.7 Hz, 1H), 7.20 (s, 1H), 7.56 (d,  $J = 8.2$  Hz, 1H), 8.46 (bs, 1H);  **$^{13}\text{C}\{^1\text{H}\}$ -NMR ( $\text{CDCl}_3$ , 125 MHz):**  $\delta$  (ppm) = 22.1, 103.40 (quint.,  $J = 4.9$  Hz), 111.4, 122.2, 123.1, 123.7, 134.4, 135.8, 143.1 (quint.,  $J = 24.0$  Hz);  **$^{19}\text{F}\{^1\text{H}\}$ -NMR ( $\text{CDCl}_3$ , 471 MHz):**  $\delta$  (ppm) = 66.4 (d,  $J = 152.9$  Hz, 4F), 81.5-82.8 (m, 1F); **IR spectrum (neat)** ( $\text{cm}^{-1}$ ) = 3475, 3398, 2926, 1629, 1512, 1438, 1385, 1316, 1107, 959, 832, 820, 652; **HRMS (ESI):**  $m/z$  calculated for  $\text{C}_9\text{H}_8\text{F}_5\text{NS}^{**}$   $[\text{M}]^{**}$  257.0292, found 257.0305.

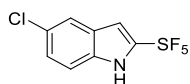

### 5-Chloro-2-(pentafluoro- $\lambda^6$ -sulfanyl)-1H-indole **5e**

Prepared according to **GP3** from crude (*E*)-*N*-(4-chloro-2-(1-chloro-2-(pentafluoro- $\lambda^6$ -sulfanyl)vinyl)phenyl)-4-toluenesulfonamide **2e** (70 mg, 0.15 mmol). The NMR shows 90% conv., the reaction was purified by preparative TLC (petroleum ether/EtOAc 90:10) affording **5e** (22.1 mg, 53 % over 2 steps) as a white powder.

$^1\text{H-NMR}$  ( $\text{CDCl}_3$ , 500 MHz):  $\delta$  (ppm) = 6.88 (s, 1H), 7.31-7.37 (m, 2H), 7.66 (s, 1H), 8.67 (bs, 1H);  $^{13}\text{C}\{^1\text{H}\}$ -NMR ( $\text{CDCl}_3$ , 125 MHz):  $\delta$  (ppm) = 103.0 (quint.,  $J$  = 5.1 Hz), 113.1, 121.9, 126.2, 126.3, 127.4, 132.3, 144.6 (quint.,  $J$  = 25.4 Hz);  $^{19}\text{F}\{^1\text{H}\}$ -NMR ( $\text{CDCl}_3$ , 471 MHz):  $\delta$  (ppm) = 66.0 (d,  $J$  = 153.0 Hz, 4F), 80.2-81.5 (m, 1F); IR spectrum (neat) ( $\text{cm}^{-1}$ ) = 3406, 2923, 1440, 1110, 1063, 956, 826, 806, 786, 658, 591, 470; HRMS (ESI):  $m/z$  calculated for  $\text{C}_8\text{H}_5\text{ClF}_5\text{NS}^{+}$  [ $\text{M}$ ] $^{+}$  276.9746, found 276.9734.

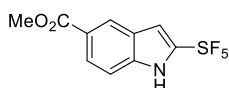

### Methyl 2-(pentafluoro- $\lambda^6$ -sulfanyl)-1H-indole-5-carboxylate **5f**

Prepared according to **GP3** from methyl (*E*)-3-(1-chloro-2-(pentafluoro- $\lambda^6$ -sulfanyl)vinyl)-4-(4-toluenesulfonamido)benzoate **2f** (80 mg, 0.16 mmol). The NMR shows 71% conv., the reaction was purified by silica gel column chromatography (petroleum ether/EtOAc 90:10) affording **5f** (20.0 mg, 41%) as a white powder.

$^1\text{H-NMR}$  ( $\text{CDCl}_3$ , 500 MHz):  $\delta$  (ppm) = 3.95 (s, 3H), 7.03 (s, 1H), 7.46 (d,  $J$  = 8.7 Hz, 1H), 8.06 (dd,  $J$  = 8.7 Hz,  $J$  = 1.2 Hz, 1H), 8.46 (s, 1H), 8.98 (bs, 1H);  $^{13}\text{C}\{^1\text{H}\}$ -NMR ( $\text{CDCl}_3$ , 125 MHz):  $\delta$  (ppm) = 52.3, 104.6 (quint.,  $J$  = 4.9 Hz), 111.8, 124.0, 124.9, 125.7, 126.6, 136.4, 144.8 (quint.,  $J$  = 24.3 Hz), 167.6;  $^{19}\text{F}\{^1\text{H}\}$ -NMR ( $\text{CDCl}_3$ , 471 MHz):  $\delta$  (ppm) = 66.1 (d,  $J$  = 153.1 Hz, 4F), 80.1-81.4 (m, 1F); IR spectrum (neat) ( $\text{cm}^{-1}$ ) = 3479, 3130, 1613, 1509, 1436, 1337, 1213, 955, 817, 788, 654; HRMS (ESI):  $m/z$  calculated for  $\text{C}_{10}\text{H}_9\text{F}_5\text{NO}_2\text{S}^{+}$  [ $\text{M}+\text{H}$ ] $^{+}$  302.0269, found 302.0268.

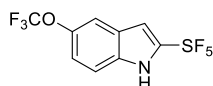

### 2-(pentafluoro- $\lambda^6$ -sulfanyl)-5-(trifluoromethoxy)-1H-indole **5g**

Prepared according to **GP3** from *N*-{2-[(*E*)-1-chloro-2-(pentafluoro- $\lambda^6$ -sulfanyl)ethenyl]-4-(trifluoromethoxy)phenyl}-4-methylbenzene-1-sulfonamide **2g** (70 mg, 0.14 mmol). A mixture of product indole(NH) (68%) and indole(NTs) (32%) was obtained. The NMR shows only 68% conv., the reaction was purified by silica gel column chromatography (petroleum ether/EtOAc 98:2) affording **5g** (17 mg, 38% yield over 2 steps) as a colorless oil and **4g** (9 mg, 14% yield) as colorless oil.

**$^1\text{H-NMR}$  ( $\text{CDCl}_3$ , 500 MHz):**  $\delta$  (ppm) = 6.96 (d,  $J$  = 1.7 Hz, 1H), 7.25 (dd,  $J$  = 9.2 Hz,  $J$  = 1.7 Hz, 1H), 7.43 (d,  $J$  = 8.9 Hz, 1H), 7.55 (s, 1H), 8.75 (bs, 1H);  **$^{13}\text{C}\{^1\text{H}\}$ -NMR ( $\text{CDCl}_3$ , 125 MHz):**  $\delta$  (ppm) = 103.8 (quint.,  $J$  = 5.0 Hz), 113.0, 114.9, 120.0, 120.8 (q,  $J$  = 256.3 Hz), 125.6, 132.2, 144.18 (q,  $J$  = 1.6 Hz), 145.0 (quint.,  $J$  = 24.8 Hz);  **$^{19}\text{F}\{^1\text{H}\}$ -NMR ( $\text{CDCl}_3$ , 471 MHz):**  $\delta$  (ppm) = -58.3 (s, 3F), 65.92 (d,  $J$  = 153.0 Hz, 4F), 79.9-81.3 (m, 1F); **IR spectrum (neat)** ( $\text{cm}^{-1}$ ) = 3490, 1525, 1452, 1254, 1209, 1151, 1106, 955, 794, 771, 675, 654, 605, 460; **HRMS (ESI):**  $m/z$  calculated for  $\text{C}_9\text{H}_5\text{F}_8\text{NOS}^{+}$  [M] $^{+}$  326.9959, found 329.9970.

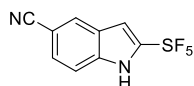

### 2-(pentafluoro- $\lambda^6$ -sulfanyl)-1H-indole-5-carbonitrile **5h**

Prepared according to **GP3** from *N*-{2-[(*E*)-1-chloro-2-(pentafluoro- $\lambda^6$ -sulfanyl)ethenyl]-4-cyanophenyl}-4-methylbenzene-1-sulfonamide **2h** (64 mg, 0.14 mmol). The NMR shows 90% conv., the reaction was purified by preparative TLC (petroleum ether/EtOAc 90:10) affording **5h** (15 mg, 40 % yield over 2 steps) as a white powder.

**$^1\text{H-NMR}$  ( $\text{CDCl}_3$ , 500 MHz):**  $\delta$  (ppm) = 7.03 (s, 1H), 7.53 (d,  $J$  = 8.6 Hz, 1H), 7.60 (dd,  $J$  = 8.6 Hz,  $J$  = 1.4 Hz, 1H), 8.08 (s, 1H), 9.05 (bs, 1H);  **$^{13}\text{C}\{^1\text{H}\}$ -NMR ( $\text{CDCl}_3$ , 125 MHz):**  $\delta$  (ppm) = 101.6, 103.9 (quint.,  $J$  = 5.0 Hz), 105.5, 113.1, 119.7, 125.4 (quint.,  $J$  = 23.0 Hz), 128.1, 128.4, 135.5;  **$^{19}\text{F}\{^1\text{H}\}$ -NMR ( $\text{CDCl}_3$ , 471 MHz):**  $\delta$  (ppm) 66.0 (d,  $J$  = 153.2 Hz, 4F), 79.1-80.4 (m, 1F); **IR spectrum (neat)** ( $\text{cm}^{-1}$ ) = 3213, 3040, 3003, 2234, 1741, 1621, 1472, 1318, 1236, 1110, 956, 833, 791, 743, 675, 598, 496, 410; **HRMS (ESI):**  $m/z$  calculated for  $\text{C}_9\text{H}_6\text{F}_5\text{N}_2\text{S}^{+}$  [M+H] $^{+}$  269.0166, found 269.0165.

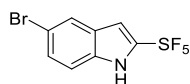

### 5-Bromo-2-(pentafluoro- $\lambda^6$ -sulfanyl)-1H-indole **5i**

Prepared according to **GP3** from crude (*E*)-*N*-(4-bromo-2-(1-chloro-2-(pentafluoro- $\lambda^6$ -sulfanyl)vinyl)phenyl)-4-toluenesulfonamide **2i** (77 mg, 0.15 mmol). The NMR shows 90% conv., the reaction was purified by silica gel column chromatography (petroleum ether/EtOAc 95:5) affording **5i** (28.0 mg, 53 % over 2 steps) as a white powder.

**$^1\text{H-NMR}$  ( $\text{CDCl}_3$ , 500 MHz):**  $\delta$  (ppm) = 6.88 (s, 1H), 7.31 (d,  $J$  = 8.8 Hz, 1H), 7.45 (dd,  $J$  = 8.8 Hz,  $J$  = 1.7 Hz, 1H), 7.82 (s, 1H), 8.64 (bs, 1H);  **$^{13}\text{C}\{^1\text{H}\}$ -NMR ( $\text{CDCl}_3$ , 125 MHz):**  $\delta$  (ppm) = 102.90 (quint.,  $J$  = 4.9 Hz), 113.4, 114.8, 125.0, 127.0, 128.7, 132.5, 144.5 (quint.,  $J$  = 24.2 Hz);  **$^{19}\text{F}\{^1\text{H}\}$ -NMR ( $\text{CDCl}_3$ , 471 MHz):**  $\delta$  (ppm) = 66.1 (d,  $J$  = 153.0 Hz, 4F), 80.1-81.4 (m, 1F); **IR spectrum (neat)** ( $\text{cm}^{-1}$ ) = 3406, 1438, 1304, 1229, 1109, 956, 879, 828, 804, 789, 680, 658, 585; **HRMS (ESI):**  $m/z$  calculated for  $\text{C}_8\text{H}_5\text{BrF}_5\text{NS}^{+}$  [ $\text{M}$ ] $^{+}$  320.9241, found 320.9242.

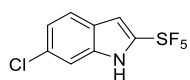

### 6-Chloro-2-(pentafluoro- $\lambda^6$ -sulfanyl)-1H-indole **5j**

Prepared according to **GP3** from crude (*E*)-*N*-(5-chloro-2-(1-chloro-2-(pentafluoro- $\lambda^6$ -sulfanyl)vinyl)phenyl)-4-toluenesulfonamide **2j** (93.6 mg, 0.2 mmol). The NMR shows 100% conv., the reaction was purified by silica gel column chromatography (petroleum ether/EtOAc 90:10) affording **5j** (36.1 mg, 65 % over 2 steps) as a white powder.

**$^1\text{H-NMR}$  ( $\text{CDCl}_3$ , 500 MHz):**  $\delta$  (ppm) = 6.92 (s, 1H), 7.19 (d,  $J$  = 8.5 Hz, 1H), 7.42 (s, 1H), 7.60 (d,  $J$  = 8.5 Hz, 1H), 8.61 (bs, 1H);  **$^{13}\text{C}\{^1\text{H}\}$ -NMR ( $\text{CDCl}_3$ , 125 MHz):**  $\delta$  (ppm) = 103.6 (quint.,  $J$  = 4.9 Hz), 111.7, 122.8, 123.6, 123.9, 131.5, 134.2, 144.1 (quint.,  $J$  = 24.2 Hz);  **$^{19}\text{F}\{^1\text{H}\}$ -NMR ( $\text{CDCl}_3$ , 471 MHz):**  $\delta$  (ppm) = 66.1 (d,  $J$  = 153.3 Hz, 4F), 80.4-81.7 (m, 1F); **IR spectrum (neat)** ( $\text{cm}^{-1}$ ) = 3308, 2922, 2850, 1686, 1617, 1527, 1293, 1217, 1114, 954, 833, 763; **HRMS (ESI):**  $m/z$  calculated for  $\text{C}_8\text{H}_5\text{ClF}_5\text{NS}^{+}$  [ $\text{M}$ ] $^{+}$  276.9746, found 276.9748.



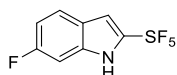**6-Fluoro-2-(pentafluoro- $\lambda^6$ -sulfanyl)-1H-indole 5k**

Prepared according to **GP3** from crude (*E*)-*N*-(2-(1-chloro-2-(pentafluoro- $\lambda^6$ -sulfanyl)vinyl)-5-fluorophenyl)-4-toluenesulfonamide **2k** (68 mg, 0.15 mmol). The NMR shows 100% conv., the reaction was purified by silica gel column chromatography (petroleum ether/EtOAc 90:10 affording **5k** (27 mg, 69 % over 2 steps) as a white powder.

**$^1\text{H-NMR}$  ( $\text{CDCl}_3$ , 500 MHz):**  $\delta$  (ppm) = 6.92 (d,  $J$  = 1.4 Hz, 1H), 6.99 (ddd,  $J$  = 9.4 Hz,  $J$  = 8.9 Hz,  $J$  = 2.3 Hz, 1H), 7.10 (dd,  $J$  = 9.1 Hz,  $J$  = 2.2 Hz, 1H), 7.62 (dd,  $J$  = 8.8 Hz,  $J$  = 5.2 Hz, 1H), 8.65 (bs, 1H);  **$^{13}\text{C}\{^1\text{H}\}$ -NMR ( $\text{CDCl}_3$ , 125 MHz):**  $\delta$  (ppm) = 98.0 (d,  $J$  = 26.7 Hz), 103.6 (quint.,  $J$  = 4.8 Hz), 111.3 (d,  $J$  = 25.1 Hz), 121.9, 123.9 (d,  $J$  = 10.2 Hz), 134.0 (d,  $J$  = 12.7 Hz), 143.9 (quint.,  $J$  = 24.5 Hz), 161.7 (d,  $J$  = 242.6 Hz);  **$^{19}\text{F}\{^1\text{H}\}$ -NMR ( $\text{CDCl}_3$ , 471 MHz):**  $\delta$  (ppm) = -115.2 (s, 1F), 66.2 (d,  $J$  = 153.0 Hz, 4F), 80.8-82.1 (m, 1F); **IR spectrum (neat)** ( $\text{cm}^{-1}$ ) = 3451, 3141, 2929, 1630, 1501, 1441, 1296, 1225, 1139, 963, 793, 756, 654, 602, 515; **HRMS (ESI):**  $m/z$  calculated for  $\text{C}_8\text{H}_5\text{F}_6\text{NS}^{+}$   $[\text{M}]^{+}$  261.0041, found 261.0054.

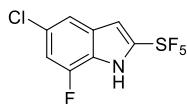**5-chloro-7-fluoro-2-(pentafluoro- $\lambda^6$ -sulfanyl)-1H-indole 5l**

Prepared according to **GP3** from *N*-{4-chloro-2-[(*E*)-1-chloro-2-(pentafluoro- $\lambda^6$ -sulfanyl)ethenyl]-6-fluorophenyl}-4-methylbenzene-1-sulfonamide **2l** (20 mg, 0.04 mmol). The NMR shows 100% conv., The reaction was purified by TLC preparative (petroleum ether/EtOAc 90:10) affording **5l** (8 mg, 66% yield over the cyclization step) as a white powder. The compound has been repurified several times due to instability in solution.

**$^1\text{H-NMR}$  ( $\text{CDCl}_3$ , 500 MHz):**  $\delta$  (ppm) = 6.92 (d,  $J$  = 2.8 Hz, 1H), 7.11 (dd,  $J$  = 10.4 Hz,  $J$  = 1.6 Hz, 1H), 7.46 (d,  $J$  = 1.6 Hz, 1H), 8.94 (bs, 1H);  **$^{13}\text{C}\{^1\text{H}\}$ -NMR ( $\text{CDCl}_3$ , 125 MHz):**  $\delta$  (ppm) = 103.5-103.8 (m), 111.6 (d,  $J$  = 19.3 Hz), 117.8 (d,  $J$  = 4.2 Hz), 126.9 (d,  $J$  = 7.5 Hz), 128.6-128.7 (m), 129.0, 131.1, 149.0 (d,  $J$  = 250.1 Hz);  **$^{19}\text{F}\{^1\text{H}\}$ -NMR ( $\text{CDCl}_3$ , 471 MHz):**  $\delta$  (ppm) = -131.0 (s, 1F), 66.05 (d,  $J$  = 153.3 Hz, 4F), 79.2-80.5 (m, 1F); **IR spectrum (neat)** ( $\text{cm}^{-1}$ ) = 3485, 2925, 2854, 1709, 1586, 1297, 1125, 1064, 956, 902, 828, 782, 677, 604, 501; **HRMS (ESI):**  $m/z$  calculated for  $\text{C}_8\text{H}_4\text{ClF}_6\text{NS}^{+}$   $[\text{M}]^{+}$  294.9652, found 294.9651.

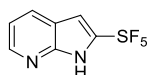**2-(pentafluoro- $\lambda^6$ -sulfanyl)-1H-pyrrolo[2,3-b]pyridine 5o**

Prepared according to **GP3** from *N*-{3-[(*E*)-1-chloro-2-(pentafluoro- $\lambda^6$ -sulfanyl)ethenyl]pyridin-2-yl}-4-methylbenzene-1-sulfonamide **2o** (27 mg, 0.06 mmol). The NMR shows 55% conv., the reaction was purified by TLC preparative (petroleum ether/EtOAc 80:20) affording **5o** (5 mg, 33% yield over the cyclization step) as a white powder as a mixture with **4o** (**4o:5o** 12:88). Product **5o** appears to be partially unstable in solution.

**$^1\text{H-NMR}$  ( $\text{CDCl}_3$ , 500 MHz):**  $\delta$  (ppm) = 6.92 (t,  $J$  = 2.5 Hz, 1H), 7.11 (dd,  $J$  = 10.4, 1.6 Hz, 1H), 7.46 (d,  $J$  = 1.5 Hz, 1H), 8.89 (bs, 1H);  **$^{13}\text{C}\{^1\text{H}\}$ -NMR ( $\text{CDCl}_3$ , 125 MHz):**  $\delta$  (ppm) = 103.5-103.8 (m), 111.6 (d,  $J$  = 19.3 Hz), 117.8 (d,  $J$  = 4.2 Hz), 126.9 (d,  $J$  = 7.5 Hz), 128.6-128.7 (m), 129.0, 131.1, 149.0 (d,  $J$  = 250.1 Hz);  **$^{19}\text{F}\{^1\text{H}\}$ -NMR ( $\text{CDCl}_3$ , 471 MHz):**  $\delta$  (ppm) = -131.0 (s, 1F), 66.05 (d,  $J$  = 153.5 Hz), 79.8 (quint.,  $J$  = 154.2 Hz, 1F); **IR spectrum (neat) ( $\text{cm}^{-1}$ )** = 2958, 2924, 2852, 1727, 1597, 1464, 1381, 1279, 1197, 1121, 1074, 866, 793, 665, 571; **HRMS (ESI):**  $m/z$  calculated for  $\text{C}_7\text{H}_6\text{F}_5\text{N}_2\text{S}^{+}$  [ $\text{M}+\text{H}$ ] $^{+}$  245.0166 found 245.0171.

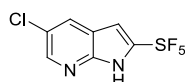**5-chloro-2-(pentafluoro- $\lambda^6$ -sulfanyl)-1H-pyrrolo[2,3-b]pyridine 5p**

Prepared according to **GP3** from *N*-{5-chloro-3-[(*E*)-1-chloro-2-(pentafluoro- $\lambda^6$ -sulfanyl)ethenyl]pyridin-2-yl}-4-methylbenzene-1-sulfonamide **2p** (18 mg, 0.04 mmol). The NMR shows 71% conv., the reaction was purified by preparative TLC (petroleum ether/EtOAc 80:20) affording **5p** (7 mg, 53% yield over the cyclization step) as a white powder.

**$^1\text{H-NMR}$  ( $\text{CDCl}_3$ , 500 MHz):**  $\delta$  (ppm) = 6.89 (s, 1H), 8.09 (d,  $J$  = 2.2 Hz, 1H), 8.47 (d,  $J$  = 2.2 Hz, 1H), 13.04 (bs, 1H);  **$^{13}\text{C}\{^1\text{H}\}$ -NMR ( $\text{CDCl}_3$ , 125 MHz):**  $\delta$  (ppm) = 100.7 (quint.,  $J$  = 5.3 Hz), 119.4, 125.6, 131.1, 144.4 (m), 145.1, 146.1 (quint.,  $J$  = 26.1 Hz);  **$^{19}\text{F}\{^1\text{H}\}$ -NMR ( $\text{CDCl}_3$ , 471 MHz):**  $\delta$  (ppm) = 65.9 (d,  $J$  = 153.7 Hz, 4F), 79.4-80.7 (m, 1F); **IR spectrum (neat) ( $\text{cm}^{-1}$ )** = 3663, 2988, 2904, 1575, 1394, 1224, 1066, 947, 792, 680; **HRMS (ESI):**  $m/z$  calculated for  $\text{C}_7\text{H}_5\text{ClF}_5\text{N}_2\text{S}^{+}$  [ $\text{M}+\text{H}$ ] $^{+}$  278.9777 found 278.9773.

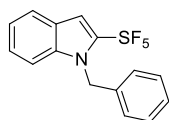

### ***N*-benzyl-2-(pentafluoro- $\lambda^6$ -sulfanyl)-1*H*-indole 7**

In a 10 mL pressure tube under N<sub>2</sub> equipped with a magnetic stir bar, the *N*-(2-ethynylphenyl)-4-toluenesulfonamide **1a** (250 mg, 0.92 mmol, 1 equiv.) was introduced and dissolved in EtOAc (0.4 M). At -40 °C, gaseous SF<sub>5</sub>Cl (300 mg, 1.84 mmol, 2.0 equiv.) was condensed in the solution and it was stirred for 5 min at this temperature before Et<sub>3</sub>B (10 mol%) was added dropwise. The tube was sealed, and it was stirred at room temperature for 16 h. The solvent was removed under vacuum, then LiOH.H<sub>2</sub>O (193 mg, 4.6 mmol, 5 equiv.) and DMSO (2.4 mL, 0.4 M) were added and the reaction mixture was stirred at 40 °C for 40 h. Then, Bn-Br (220  $\mu$ L, 1.84 mmol, 2 equiv.) was added via a syringe and the mixture was stirred for 2 hours at 40 °C. The reaction was quenched with saturated solution of NH<sub>4</sub>Cl and extracted with 3 volumes of EtOAc. The combined organic layers were dried over MgSO<sub>4</sub>, filtered and concentrated under reduced pressure. The crude mixture was purified by silica gel column chromatography (100% Cyclohexane) affording **7** (255 mg, 83%) as a colorless solid.

**<sup>1</sup>H-NMR (CDCl<sub>3</sub>, 400 MHz):**  $\delta$  (ppm) = 5.65 (s, 2H), 6.93 (d,  $J$  = 6.8 Hz, 2H), 7.13 (s, 1H), 7.16-7.32 (m, 6H), 7.71 (d,  $J$  = 7.9 Hz, 1H); **<sup>13</sup>C{<sup>1</sup>H}-NMR (CDCl<sub>3</sub>, 125 MHz):**  $\delta$  (ppm) = 49.5 (quint.  $J$  = 3.5 Hz), 105.8 (quint.,  $J$  = 5.1 Hz), 111.4, 121.7, 122.6, 124.5, 125.5, 125.6, 127.4, 128.8, 136.2, 137.1, 146.7 (quint.,  $J$  = 22.7 Hz); **<sup>19</sup>F{<sup>1</sup>H}-NMR (CDCl<sub>3</sub>, 471 MHz):**  $\delta$  (ppm) = 72.8 (d,  $J$  = 153.5 Hz, 4F), 82.8-84.2 (m, 1F); **IR spectrum (neat) (cm<sup>-1</sup>)** = 3145, 2925, 1596, 1531, 1449, 1392, 1256, 1221, 1150, 1122, 1087, 1001, 851, 799, 781, 741, 668, 572, 542; **HRMS (ESI):**  $m/z$  calculated for C<sub>15</sub>H<sub>12</sub>F<sub>5</sub>NS<sup>+</sup> [M]<sup>+</sup> 333.0605, found 333.0595.

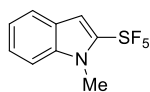

### **1-Methyl-2-(pentafluoro- $\lambda^6$ -sulfanyl)-1*H*-indole 8**

Product **8** was prepared from **1a** (580 mg, 2.14 mmol) following the same procedure described for product **7**, expect that the alkylation was performed by addition of Me-I (267  $\mu$ L, 2 equiv.) and the mixture was stirred for 0.5 hour at 25 °C. Solvent was evaporated under vacuum and the crude mixture was purified by silica gel column chromatography and purified with 100% of P.E. affording **8** (375 mg, 68%) as a white powder.

**<sup>1</sup>H-NMR (CDCl<sub>3</sub>, 500 MHz):**  $\delta$  (ppm) = 3.94 (s, 1H), 7.03 (s, 1H), 7.20-7.23 (m, 1H), 7.38-7.42 (m, 2H), 7.67 (d,  $J$  = 7.9 Hz, 1H); **<sup>13</sup>C{<sup>1</sup>H}-NMR (CDCl<sub>3</sub>, 125 MHz):**  $\delta$  (ppm) = 32.9 (quint.  $J$  = 3.9 Hz), 105.1 (quint.,  $J$  = 5.2 Hz), 110.4, 121.3, 122.5, 124.3, 125.2, 136.3, 146.1-146.9 (m); **<sup>19</sup>F{<sup>1</sup>H}-NMR (CDCl<sub>3</sub>, 471 MHz):**  $\delta$

(ppm) = 72.2 (d,  $J = 152.6$  Hz, 4F), 83.1-84.4 (m, 1F); **IR spectrum (neat)** ( $\text{cm}^{-1}$ ) = 3118, 1615, 1467, 1428, 1318, 1176, 1105, 1072, 936, 898, 829, 777, 750, 675, 637, 604, 528, 460; **HRMS (ESI)**:  $m/z$  calculated for  $\text{C}_9\text{H}_8\text{F}_5\text{NS}^{+}$  [ $\text{M}]^{+}$  257.0292, found 257.0298.

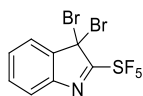

### 3,3-dibromo-2-(pentafluoro- $\lambda^6$ -sulfanyl)-3H-indole 9

To a Schlenk tube under nitrogen containing 2-(pentafluoro- $\lambda^6$ -sulfanyl)-1H-indole **5a** (20 mg, 0.082 mmol) dissolved in dichloromethane (0.5 mL) was added *N*-bromosuccinimide (36.6 mg, 0.206 mmol) and the reaction was stirred at room temperature for 30 min. The crude mixture was concentrated under reduced pressure and purified by silica gel column chromatography (cyclohexane) affording **9** (31 mg, 94%) as a white solid.

**$^1\text{H-NMR}$  ( $\text{CDCl}_3$ , 500 MHz)**:  $\delta$  (ppm) = 7.48 (dt,  $J = 7.7$  Hz,  $J = 1.2$  Hz, 1H), 7.55 (dt,  $J = 7.6$  Hz,  $J = 1.1$  Hz, 1H), 7.66 (d,  $J = 7.6$  Hz, 1H), 7.72-7.74 (m, 1H);  **$^{13}\text{C}\{^1\text{H}\}$ -NMR ( $\text{CDCl}_3$ , 125 MHz)**:  $\delta$  (ppm) = 43.3, 124.0, 124.1, 131.4, 131.6, 141.2, 142.5, 178.3 (quint.,  $J = 23.2$  Hz);  **$^{19}\text{F}\{^1\text{H}\}$ -NMR ( $\text{CDCl}_3$ , 471 MHz)**:  $\delta$  (ppm) = 63.6 (d,  $J = 153.5$  Hz, 4F), 73.3-74.7 (m, 1F); **IR spectrum (neat)** ( $\text{cm}^{-1}$ ) = 3082, 2927, 1554, 1468, 1454, 1206, 1172, 1126, 920, 838, 761, 734, 677, 577; **HRMS (ESI)**:  $m/z$  calculated for  $\text{C}_8\text{H}_4\text{Br}_2\text{F}_5\text{NS}^{+}$  [ $\text{M}]^{+}$  398.8346, found 398.8347.

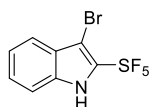

### 3-Bromo-2-(pentafluoro- $\lambda^6$ -sulfanyl)-1H-indole 10

To a Schlenk tube under nitrogen containing 2-(pentafluoro- $\lambda^6$ -sulfanyl)-1H-indole **5a** (20 mg, 0.082 mmol) dissolved in dry dichloromethane (0.5 mL) was added *N*-bromosuccinimide (17.6 mg, 0.099 mmol), triethylamine (13.7  $\mu\text{L}$ , 0.099 mmol) and the reaction was stirred at room temperature for 1h. The crude mixture was concentrated under reduced pressure and purified by silica gel column chromatography (cyclohexane/EtOAc 95:5) affording **10** (15 mg, 57%) as a white solid.

**$^1\text{H-NMR}$  ( $\text{CDCl}_3$ , 500 MHz)**:  $\delta$  (ppm) = 7.23-7.32 (m, 1H), 7.38-7.41 (m, 2H), 7.69 (d,  $J = 7.8$  Hz, 1H), 8.77 (bs, 1H);  **$^{13}\text{C}\{^1\text{H}\}$ -NMR ( $\text{CDCl}_3$ , 125 MHz)**:  $\delta$  (ppm) = 91.8 (quint.,  $J = 3.4$  Hz), 111.8, 121.6, 122.3, 125.8, 126.8, 132.9, 142.2 (quint.,  $J = 23.7$  Hz);  **$^{19}\text{F}\{^1\text{H}\}$ -NMR ( $\text{CDCl}_3$ , 471 MHz)**:  $\delta$  (ppm) = 68.9 (d,  $J = 154.8$  Hz, 4F), 75.6-83.1 (m, 1F); **IR spectrum (neat)** ( $\text{cm}^{-1}$ ) = 3393, 2923, 1620, 1578, 1446, 1304, 1203, 1118, 1023, 907, 836, 781, 747, 679, 649, 577, 539; **HRMS (ESI)**:  $m/z$  calculated for  $\text{C}_8\text{H}_5\text{BrF}_5\text{NS}^{+}$  [ $\text{M}]^{+}$  320.9241, found 320.9237.

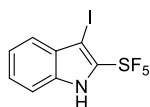

### 3-Iodo-2-(pentafluoro- $\lambda^6$ -sulfanyl)-1H-indole **11**

2-(Pentafluoro- $\lambda^6$ -sulfanyl)-1H-indole **5a** (40 mg, 0.16 mmol, 1 equiv.) and KOH (2.5 eq., 23.069 mg, 0.41 mmol) were dissolved in DMF (0.5 mL) and the mixture was stirred at rt for 20 min. Then at rt, a solution of iodine (1 eq., 41.74 mg, 0.0085 mL, 0.16 mmol) in DMF (0.3 mL) was added and the mixture was stirred at rt for 2 hours. The reaction was quenched with  $\text{NH}_4\text{Cl}$  sat. solution and extracted with EtOAc. The combined organic layers were dried over  $\text{MgSO}_4$ , filtered and concentrated under reduced pressure. The crude mixture was purified by silica gel column chromatography (100% Cyclohexane) affording **11** (49 mg, 81%) as an orange solid.

$^1\text{H-NMR}$  ( $\text{CDCl}_3$ , 500 MHz):  $\delta$  (ppm) = 7.28-7.31 (m, 1H), 7.37-7.43 (m, 2H), 7.59 (d,  $J$  = 8.1 Hz, 1H), 8.85 (bs, 1H);  $^{13}\text{C}\{^1\text{H}\}$ -NMR ( $\text{CDCl}_3$ , 125 MHz):  $\delta$  (ppm) = 59.8 (quint.,  $J$  = 3.9 Hz), 111.8, 122.5, 124.0, 126.8, 129.3, 133.4, 146.9 (quint.,  $J$  = 24.1 Hz);  $^{19}\text{F}\{^1\text{H}\}$ -NMR ( $\text{CDCl}_3$ , 471 MHz):  $\delta$  (ppm) = 69.1 (d,  $J$  = 155.2 Hz, 4F), 80.5-81.9 (m, 1F); IR spectrum (neat) ( $\text{cm}^{-1}$ ) = 3361, 2922, 1737, 1617, 1500, 1443, 1198, 1117, 1013, 995, 904, 832, 744675, 648, 604, 535, 474; HRMS (ESI):  $m/z$  calculated for  $\text{C}_8\text{H}_5\text{F}_5\text{INS}^{+}$   $[\text{M}]^{+}$  368.9102, found 368.9097.

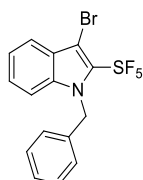

### 1-Benzyl-3-dibromo-2-(pentafluoro- $\lambda^6$ -sulfanyl)-1H-indole **12**

To a Schlenk tube under nitrogen containing 2-(pentafluoro- $\lambda^6$ -sulfanyl)-1H-indole **5a** (20 mg, 0.082 mmol) dissolved in DMF (1 mL) was added sodium hydride 60% in mineral oil (7.5 mg, 0.19 mmol) followed by benzyl bromide (22.3  $\mu\text{L}$ , 0.19 mmol) and the reaction was stirred at 50  $^\circ\text{C}$  overnight. The crude  $^{19}\text{F}$  NMR shows 88% conversion and 12% starting material left. The mixture was concentrated under reduced pressure and purified by silica gel column chromatography (cyclohexane) affording **12** (32 mg, 83%) as a colorless oil.

$^1\text{H-NMR}$  ( $\text{CDCl}_3$ , 500 MHz):  $\delta$  (ppm) = 5.74 (s, 2H), 6.90 (d,  $J$  = 8.2 Hz, 2H), 7.19 (d,  $J$  = 8.4 Hz, 1H), 7.25-7.32 (m, 4H), 7.34-7.39 (m, 1H), 7.76 (d,  $J$  = 7.4 Hz, 1H);  $^{13}\text{C}\{^1\text{H}\}$ -NMR ( $\text{CDCl}_3$ , 125 MHz):  $\delta$  (ppm) = 50.5 (quint.,  $J$  = 3.5 Hz), 93.7 (quint.,  $J$  = 4.1 Hz), 111.6, 121.8, 122.4, 125.4, 125.5, 126.9, 127.5, 128.9, 135.2, 136.8, 145.1 (quint.,  $J$  = 21.1 Hz);  $^{19}\text{F}\{^1\text{H}\}$ -NMR ( $\text{CDCl}_3$ , 471 MHz):  $\delta$  (ppm) = 72.7 (d,  $J$  = 154.3 Hz, 4F), 81.6-82.9 (m, 1F); IR spectrum (neat) ( $\text{cm}^{-1}$ ) = 3028, 1612, 1498, 1464, 1445, 1318, 1193, 1114, 1016,

942, 843, 775, 740, 728, 692, 577. **HRMS (ESI):**  $m/z$  calculated for  $C_{15}H_{11}BrF_5NS^{+}$   $[M]^{+}$  410.9710, found 410.9738.

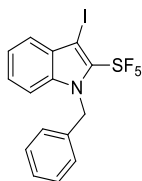

### 1-Benzyl-3-iodo-2-(pentafluoro- $\lambda^6$ -sulfanyl)-1H-indole **13**

In a Schlenk tube under nitrogen were dissolved 2-(pentafluoro- $\lambda^6$ -sulfanyl)-1H-indole **5a** (30 mg, 0.12 mmol) and KOH (17.3 mg, 0.26 mmol) in DMF (0.6 mL) and the mixture was stirred at room temperature for 25 min. Then a solution of iodine (31.3 mg, 0.12 mmol) in DMF (0.6 mL) was added dropwise and stirred at room temperature for 2h until full conversion. Sodium hydride (60% in mineral oil, 9.9 mg, 0.25 mmol) was added followed by benzyl bromide (30  $\mu$ L, 0.25 mmol) and the reaction was stirred overnight. Quenched with saturated solution of  $NH_4Cl$  and extracted with EtOAc, dried over  $MgSO_4$ , filtered and concentrated under vacuum. The crude mixture was purified by silica gel column chromatography (cyclohexane) affording **13** (33 mg, 58%) as a colorless oil.

**$^1H$ -NMR ( $CDCl_3$ , 500 MHz):**  $\delta$  (ppm) = 5.78 (s, 2H), 6.90-6.91 (m, 2H), 7.16 (d,  $J$  = 8.4 Hz, 1H), 7.25-7.37 (m, 5H), 7.68 (dd,  $J$  = 8.4 Hz,  $J$  = 1.2 Hz, 1H);  **$^{13}C\{^1H\}$ -NMR ( $CDCl_3$ , 125 MHz):**  $\delta$  (ppm) = 50.9 (quint.,  $J$  = 4.1 Hz), 62.1 (quint.,  $J$  = 4.5 Hz), 111.7, 122.6, 124.6, 125.4, 126.8, 127.5, 128.9, 129.1, 135.7, 136.9, 149.5 (quint.,  $J$  = 21.6 Hz);  **$^{19}F\{^1H\}$ -NMR ( $CDCl_3$ , 471 MHz):**  $\delta$  (ppm) = 73.2 (d,  $J$  = 155.1 Hz, 4F), 82.3-83.7 (m, 1F); **IR spectrum (neat) ( $cm^{-1}$ )** = 3032, 2904, 1606, 1489, 1441, 1327, 1265, 1192, 1104, 1018, 931, 837, 771, 675, 579, 458; **HRMS (ESI):**  $m/z$  calculated for  $C_{15}H_{11}F_5INS^{+}$   $[M]^{+}$  458.9572, found 458.9572.

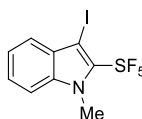

### 3-Iodo-1-methyl-2-(pentafluoro- $\lambda^6$ -sulfanyl)-1H-indole **14**

In a Schlenk tube under nitrogen were dissolved 2-(pentafluoro- $\lambda^6$ -sulfanyl)-1H-indole **5a** (25 mg, 0.103 mmol) and KOH (17 mg, 0.26 mmol) in DMF (0.6 mL) and the mixture was stirred at room temperature for 25 min. Then a solution of iodine (26.1 mg, 0.103 mmol) in DMF (0.6 mL) was added dropwise and stirred at room temperature for 2h until full conversion. Sodium hydride (60% in mineral oil, 8.2 mg, 0.206 mmol) was added followed by iodomethane (9.6  $\mu$ L, 0.15 mmol) and the reaction was stirred overnight. Quenched with saturated solution of  $NH_4Cl$  and extracted with EtOAc, dried over  $MgSO_4$ ,

filtered and concentrated under vacuum. The crude mixture was purified by silica gel column chromatography (petroleum ether/EtOAc 90:10) affording **14** (35 mg, 89%) as a white solid.

**<sup>1</sup>H-NMR (CDCl<sub>3</sub>, 500 MHz):** δ (ppm) = 4.03 (quint., *J* = 1.2 Hz, 3H), 7.29 (ddd, *J* = 8.1 Hz, *J* = 7.0 Hz, *J* = 1.0 Hz, 1H), 7.35 (d, *J* = 8.5 Hz, 1H), 7.45 (ddd, *J* = 8.3 Hz, *J* = 6.9 Hz, *J* = 1.2 Hz, 1H), 7.60 (d, *J* = 8.1 Hz, 1H); **<sup>13</sup>C{<sup>1</sup>H}-NMR (CDCl<sub>3</sub>, 125 MHz):** δ (ppm) = 34.5 (quint., *J* = 4.5 Hz), 61.1 (quint., *J* = 5.0 Hz), 110.6, 122.3, 124.5, 126.4, 128.9, 135.9, 149.4 (quint., *J* = 19.6 Hz); **<sup>19</sup>F{<sup>1</sup>H}-NMR (CDCl<sub>3</sub>, 471 MHz):** δ (ppm) = 72.5 (d, *J* = 154.4 Hz, 4F), 82.5-83.8 (m, 1F); **IR spectrum (neat) (cm<sup>-1</sup>)** = 2958, 1462, 1343, 1234, 1163, 1110, 933, 830, 781, 761, 742, 675, 584, 549; **HRMS (ESI):** *m/z* calculated for C<sub>9</sub>H<sub>7</sub>F<sub>5</sub>INS<sup>+</sup> [M]<sup>+</sup> 382.9259, found 382.9280.

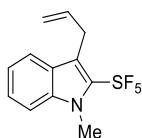

#### 1-Methyl-2-(pentafluoro-λ<sup>6</sup>-sulfanyl)-3-(prop-2-en-1-yl)-1H-indole **15**

In 5 mL round bottom flask equipped with a magnetic stir bar, 3-iodo-1-methyl-2-(pentafluoro-λ<sup>6</sup>-sulfanyl)-1H-indole **14** (10 mg, 0.026 mmol) was dissolved in THF (0.2 mL) under N<sub>2</sub>. The mixture was cooled down to -20 °C and *i*PrMgCl (2M in THF) (14.4 μL, 1.1 equiv.) was added dropwise. The reaction was stirred at -20 °C for 1 hour, and allyl bromide (4.5 μL, 2 equiv.) was added via a syringe. The reaction was stirred at rt for 2 hours. The crude mixture was purified by silica gel column chromatography (100% Cyclohexane) affording **15** (6 mg, 77%) as a colorless oil.

**<sup>1</sup>H-NMR (CDCl<sub>3</sub>, 500 MHz):** δ (ppm) = 3.77 (d, *J* = 5.8 Hz, 2H), 3.93 (s, 3H), 5.03 (dd, *J* = 10.1 Hz, *J* = 1.1 Hz, 1H), 5.09 (dd, *J* = 17.1 Hz, *J* = 1.4 Hz, 1H), 5.94 (ddt, *J* = 16.5 Hz, *J* = 10.1 Hz, *J* = 6.2 Hz, 1H), 7.19 (t, *J* = 7.5 Hz, 1H), 7.33-7.43 (m, 2H), 7.67 (d, *J* = 8.0 Hz, 1H); **<sup>13</sup>C{<sup>1</sup>H}-NMR (CDCl<sub>3</sub>, 125 MHz):** δ (ppm) = 29.9, 33.3 (quint., *J* = 4.6 Hz), 110.3, 114.5 (quint., *J* = 3.7 Hz), 115.8, 120.7, 121.2, 125.2, 125.5, 136.1 (2C), 143.7-144.0 (m); **<sup>19</sup>F{<sup>1</sup>H}-NMR (CDCl<sub>3</sub>, 471 MHz):** δ (ppm) = 73.2 (d, *J* = 151.7 Hz, 4F), 85.0-86.3 (m, 1F); **IR spectrum (neat) (cm<sup>-1</sup>)** = 3083, 2980, 1640, 1613, 1531, 1466, 1351, 1327, 1249, 1169, 1147, 1017, 912, 829, 774, 738, 672, 587; **HRMS (ESI):** *m/z* calculated for C<sub>12</sub>H<sub>12</sub>F<sub>5</sub>NS<sup>+</sup> [M]<sup>+</sup> 297.0605, found 297.0590.

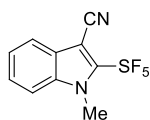

### 1-Methyl-2-(pentafluoro- $\lambda^6$ -sulfanyl)-1H-indole-3-carbonitrile **16**

In 5 mL round bottom flask equipped with a magnetic stir bar, 3-iodo-1-methyl-2-(pentafluoro- $\lambda^6$ -sulfanyl)-1H-indole **14** (54 mg, 0.14 mmol) was dissolved in THF (0.5 mL) under  $N_2$ . The mixture was cooled down to  $-20\text{ }^\circ\text{C}$  and *i*PrMgCl (2M in THF) (77.5  $\mu\text{L}$ , 1.1 equiv.) was added dropwise. The reaction was stirred at  $-20\text{ }^\circ\text{C}$  for 1 hour, and TsCN (51 mg, 2 equiv.) was added as solution in THF (0.5 mL) via a syringe. The reaction was stirred at rt for 16 hours. The crude mixture was purified by silica gel column chromatography (P.E:EtOAc 95:5) affording **16** (19 mg, 48%) as a white solid.

$^1\text{H-NMR}$  ( $\text{CDCl}_3$ , 500 MHz):  $\delta$  (ppm) = 4.05 (s, 3H), 7.42 (t,  $J = 7.5$  Hz, 1H), 7.48-7.55 (m, 2H), 7.83 (d,  $J = 8.1$  Hz, 1H);  $^{13}\text{C}\{^1\text{H}\}$ -NMR ( $\text{CDCl}_3$ , 125 MHz):  $\delta$  (ppm) = 34.1 (quint.  $J = 4.0$  Hz), 88.3-88.4 (m), 111.3, 113.1, 121.1, 124.1, 125.4, 127.1, 135.0, 149.6-150.4 (m);  $^{19}\text{F}\{^1\text{H}\}$ -NMR ( $\text{CDCl}_3$ , 471 MHz):  $\delta$  (ppm) = 72.1 (d,  $J = 152.6$  Hz, 4F), 78.2-79.5 (m, 1F); IR spectrum (neat) ( $\text{cm}^{-1}$ ) = 2968, 2234, 1515, 1468, 1359, 1246, 1169, 1150, 1012, 850, 836, 785, 743, 681, 661, 620, 593, 575, 507; HRMS (ESI):  $m/z$  calculated for  $\text{C}_{10}\text{H}_7\text{F}_5\text{N}_2\text{NaS}^{+}$  [ $\text{M}+\text{Na}$ ] $^{+}$  305.0142, found 305.0146.

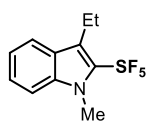

### 3-Ethyl-1-methyl-2-(pentafluoro- $\lambda^6$ -sulfanyl)-1H-indole **17**

In a 5 mL shlenck vial, 3-iodo-1-methyl-2-(pentafluoro- $\lambda^6$ -sulfanyl)-1H-indole **14** (30 mg, 0.078 mmol) and bis(tri-*tert*-butylphosphine)palladium(0) (2 mg, 5 mol%) were dissolved in THF (0.3 mL) under  $N_2$ . At room temperature, diethylzinc (0.2 mL, 2.5 equiv.) solution in THF (1M) was added via a syringe. The black mixture was stirred at  $60\text{ }^\circ\text{C}$  for 16 hours. The solvent was evaporated and  $^{19}\text{F}$  NMR showed product with 78% conversion. It was purified by chromatography on silica gel (100% P.E) affording a mixture of expected product **17** and reduced product **8** as side product of the reaction. Unfortunately, these 2 products were not separable by chromatography.

$^1\text{H-NMR}$  ( $\text{CDCl}_3$ , 500 MHz):  $\delta$  (ppm) = 1.26 (t,  $J = 7.5$  Hz, 3H), 3.03 (q,  $J = 7.4$  Hz, 2H), 3.91 (s, 3H), 7.17-7.23 (m, 1H), 7.33-7.42 (m, 2H), 7.68 (d,  $J = 8.0$  Hz, 1H);  $^{13}\text{C}\{^1\text{H}\}$ -NMR ( $\text{CDCl}_3$ , 125 MHz):  $\delta$  (ppm) = 15.4, 18.8, 33.2 (quint.,  $J = 4.6$  Hz), 110.3, 119.1 (quint.,  $J = 3.9$  Hz), 120.5, 120.9, 124.8, 125.4, 136.2, 143.0-143.6 (m);  $^{19}\text{F}\{^1\text{H}\}$ -NMR ( $\text{CDCl}_3$ , 471 MHz):  $\delta$  (ppm) = 73.0 (d,  $J = 151.6$  Hz, 4F), 85.3-86.6 (m, 1F).



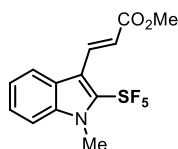

### Methyl (2E)-3-[1-methyl-2-(pentafluoro- $\lambda^6$ -sulfanyl)-1H-indol-3-yl]prop-2-enoate **18**

In a 5 mL shlenck vial, 3-iodo-1-methyl-2-(pentafluoro- $\lambda^6$ -sulfanyl)-1H-indole **14** (30 mg, 0.078 mmol) and palladium acetate (2.25 mg, 20 mol%) and triphenylphosphine (7.12 mg, 40 mol%) were dissolved in DMF (0.4 mL) under N<sub>2</sub>. At room temperature, triethylamine (24  $\mu$ L, 2.5 equiv.) and methyl acrylate (15  $\mu$ L, 2.5 equiv.) were added via a syringe. The brown mixture was stirred at 100 °C for 12 hours. The solvent was evaporated and <sup>19</sup>F NMR showed product with 68% conversion (24% of starting material was not consumed). It was purified by TLC prep (P.E:EtOAc, 90:10) affording **18** (15.4 mg, 58%) as colorless oil.

<sup>1</sup>H-NMR (CDCl<sub>3</sub>, 500 MHz):  $\delta$  (ppm) = 3.85 (s, 3H), 4.00 (s, 3H), 6.56 (d,  $J$  = 16.1 Hz, 1H), 7.31 (ddd,  $J$  = 8.1 Hz,  $J$  = 6.4 Hz,  $J$  = 1.7 Hz, 1H), 7.41-7.48 (m, 2H), 7.95 (d,  $J$  = 8.2 Hz, 1H), 8.15 (d,  $J$  = 16.1 Hz, 1H); <sup>13</sup>C{<sup>1</sup>H}-NMR (CDCl<sub>3</sub>, 125 MHz):  $\delta$  (ppm) = 33.8 (quint.,  $J$  = 4.2 Hz), 51.9, 110.9, 111.7-111.8 (m), 121.2, 122.0, 122.8, 123.2, 126.1, 136.4 (2C), 146.1-146.7 (m), 167.5; <sup>19</sup>F{<sup>1</sup>H}-NMR (CDCl<sub>3</sub>, 471 MHz):  $\delta$  (ppm) = 74.0 (d,  $J$  = 151.9 Hz, 4F), 83.0-84.3 (m, 1F); IR spectrum (neat) (cm<sup>-1</sup>) = 2984, 1722, 1630, 1469, 1434, 1354, 1058, 978, 851, 782, 676, 597.

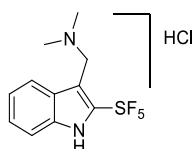

### Dimethyl(2-((pentafluoro- $\lambda^6$ -sulfanyl)-1H-indol-3-yl)methyl)amine hydrochloride **19**

A solution of formaldehyde (10 eq., 185  $\mu$ L, 2.47 mmol), in AcOH (500  $\mu$ L), water (240  $\mu$ L) and 1,4-dioxane (500  $\mu$ L) was cooled down to 0 °C and Me<sub>2</sub>NH (2M in THF) (10 eq., 1.2 mL, 2.47 mmol) was added dropwise to the solution. The mixture was stirred at 0 °C for 5 min and 2-(pentafluoro- $\lambda^6$ -sulfanyl)-1H-indole **5a** (1 eq., 60 mg, 0.25 mmol) in 1,4-dioxane (0.5 mL) was added slowly to the solution. It was stirred at 0 °C for 2 hours then rt for 16 h. The reaction mixture was quenched with NaHCO<sub>3</sub> sat. solution and extracted with EtOAc. The combined organic layers were dried over MgSO<sub>4</sub>, filtered and concentrated at reduced pressure. HCl (4M in 1,4-dioxane) (123  $\mu$ L, 2 equiv.) was added dropwise, the solvent was removed, and the product was recrystallized from acetone and pentane affording **19** (47 mg, 57%) as a white powder.

**<sup>1</sup>H-NMR (DMSO d<sub>6</sub>, 500 MHz):** δ (ppm) = 2.82 (s, 6H), 4.69 (s, 2H), 7.28 (t, *J* = 7.5 Hz, 1H), 7.43 (t, *J* = 7.6 Hz, 1H), 7.56 (d, *J* = 8.3 Hz, 1H), 8.10 (d, *J* = 8.1 Hz, 1H), 9.79 (bs, 1H), 13.19 (s, 1H); **(DMSO d<sub>6</sub>, 125 MHz):** δ (ppm) = 42.8, 49.9, 102.4, 112.7, 121.4, 121.5, 124.7, 125.8, 133.5, 143.1 (quint., *J* = 22.5 Hz); **<sup>19</sup>F{<sup>1</sup>H}-NMR (DMSO d<sub>6</sub>, 471 MHz):** δ (ppm) = 72.4 (d, *J* = 153.5 Hz, 4F), 83.8-85.1 (m, 1F); **IR spectrum (neat) (cm<sup>-1</sup>)** = 2972, 2902, 1714, 1535, 1478, 1435, 1388, 1346, 1307, 1232, 1101, 1018, 974, 930, 838, 771, 744, 670, 581; **HRMS (ESI):** *m/z* calculated for C<sub>11</sub>H<sub>14</sub>F<sub>5</sub>N<sub>2</sub>S<sup>+</sup> [M+H]<sup>+</sup> 301.0792, found 301.0815.

## 6 DSC Analysis

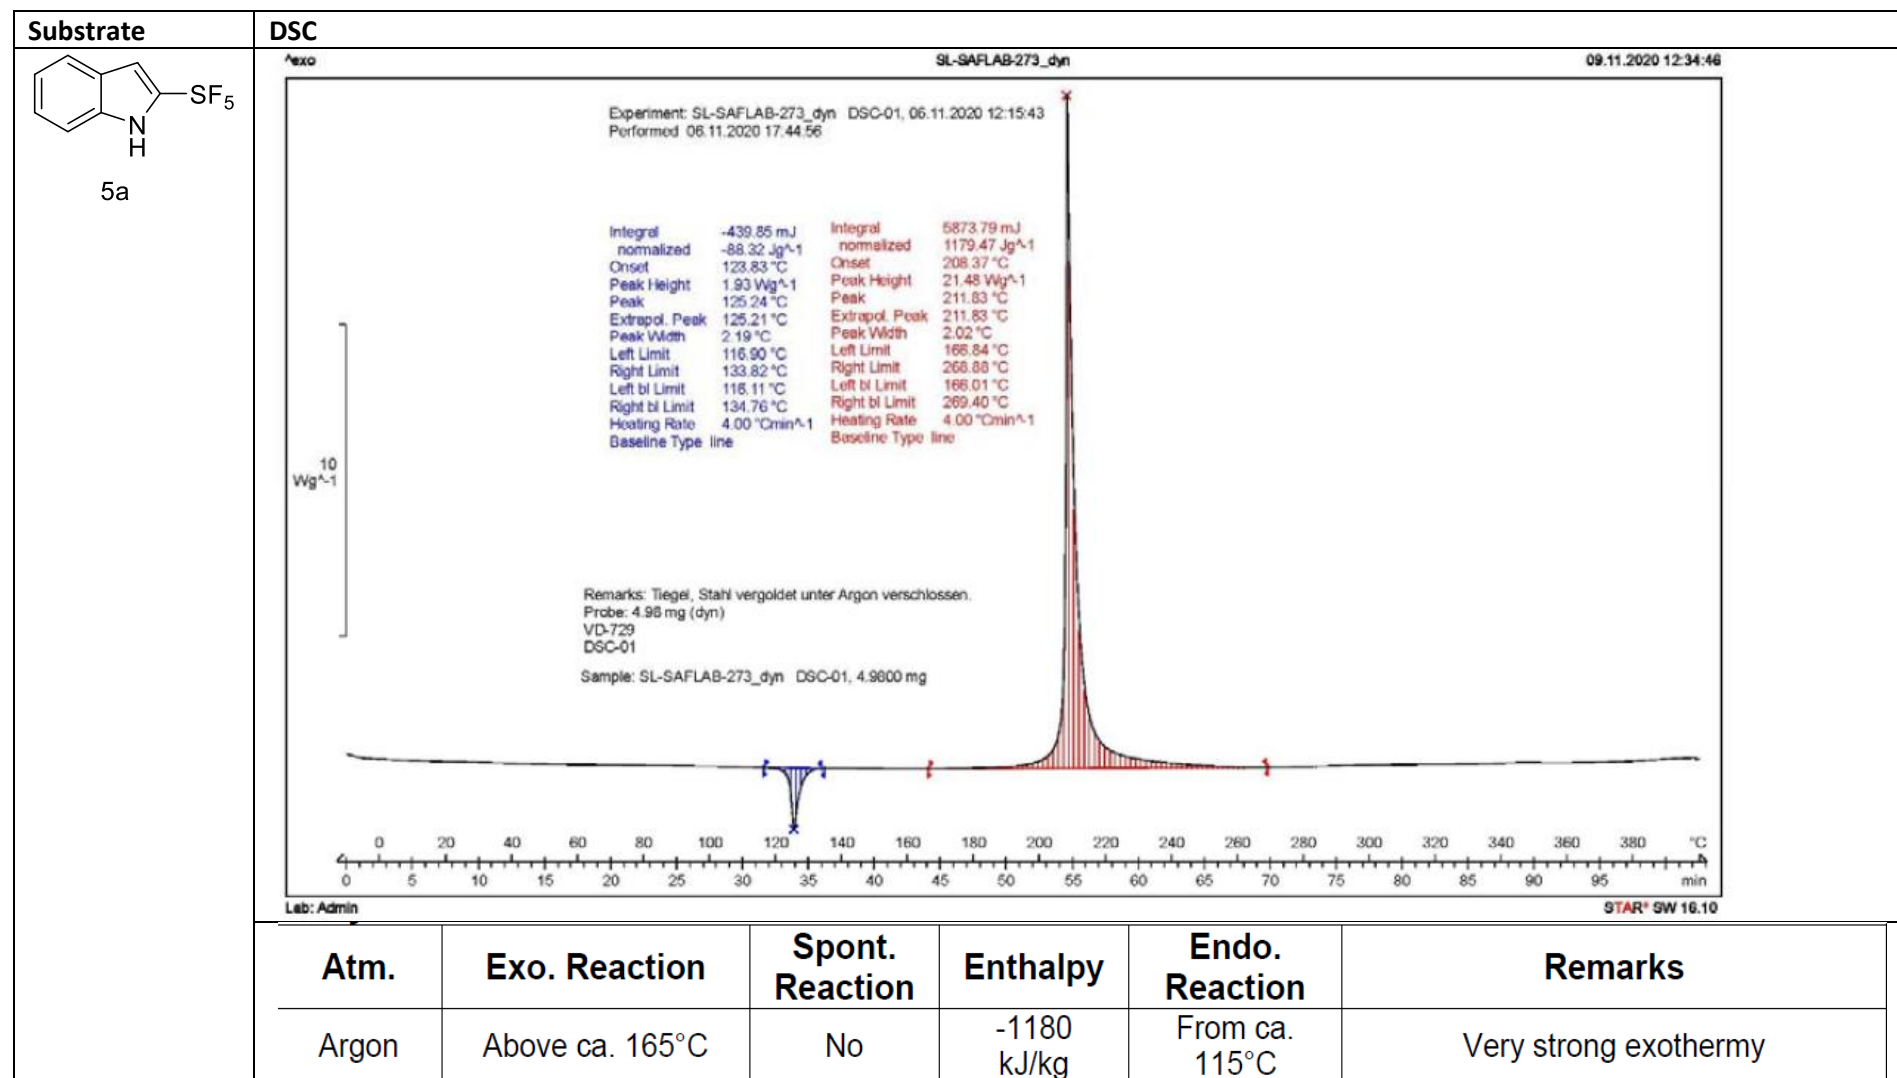

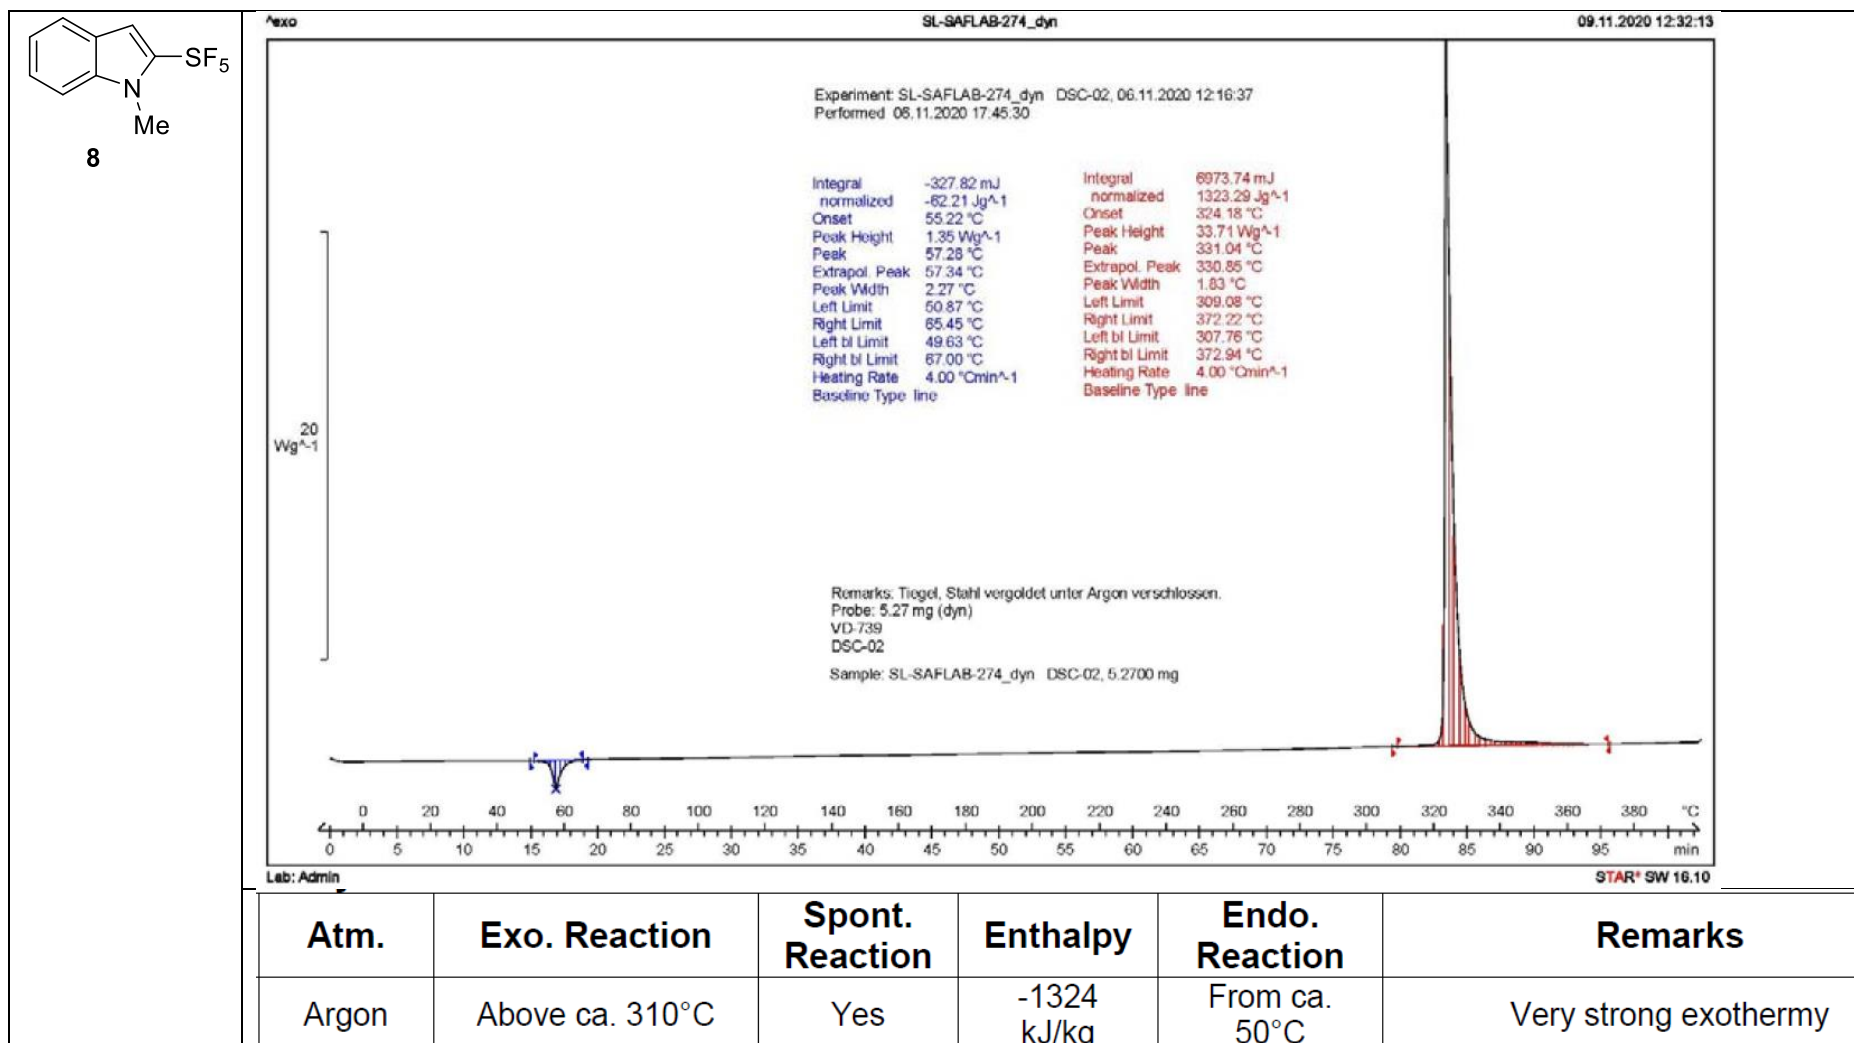

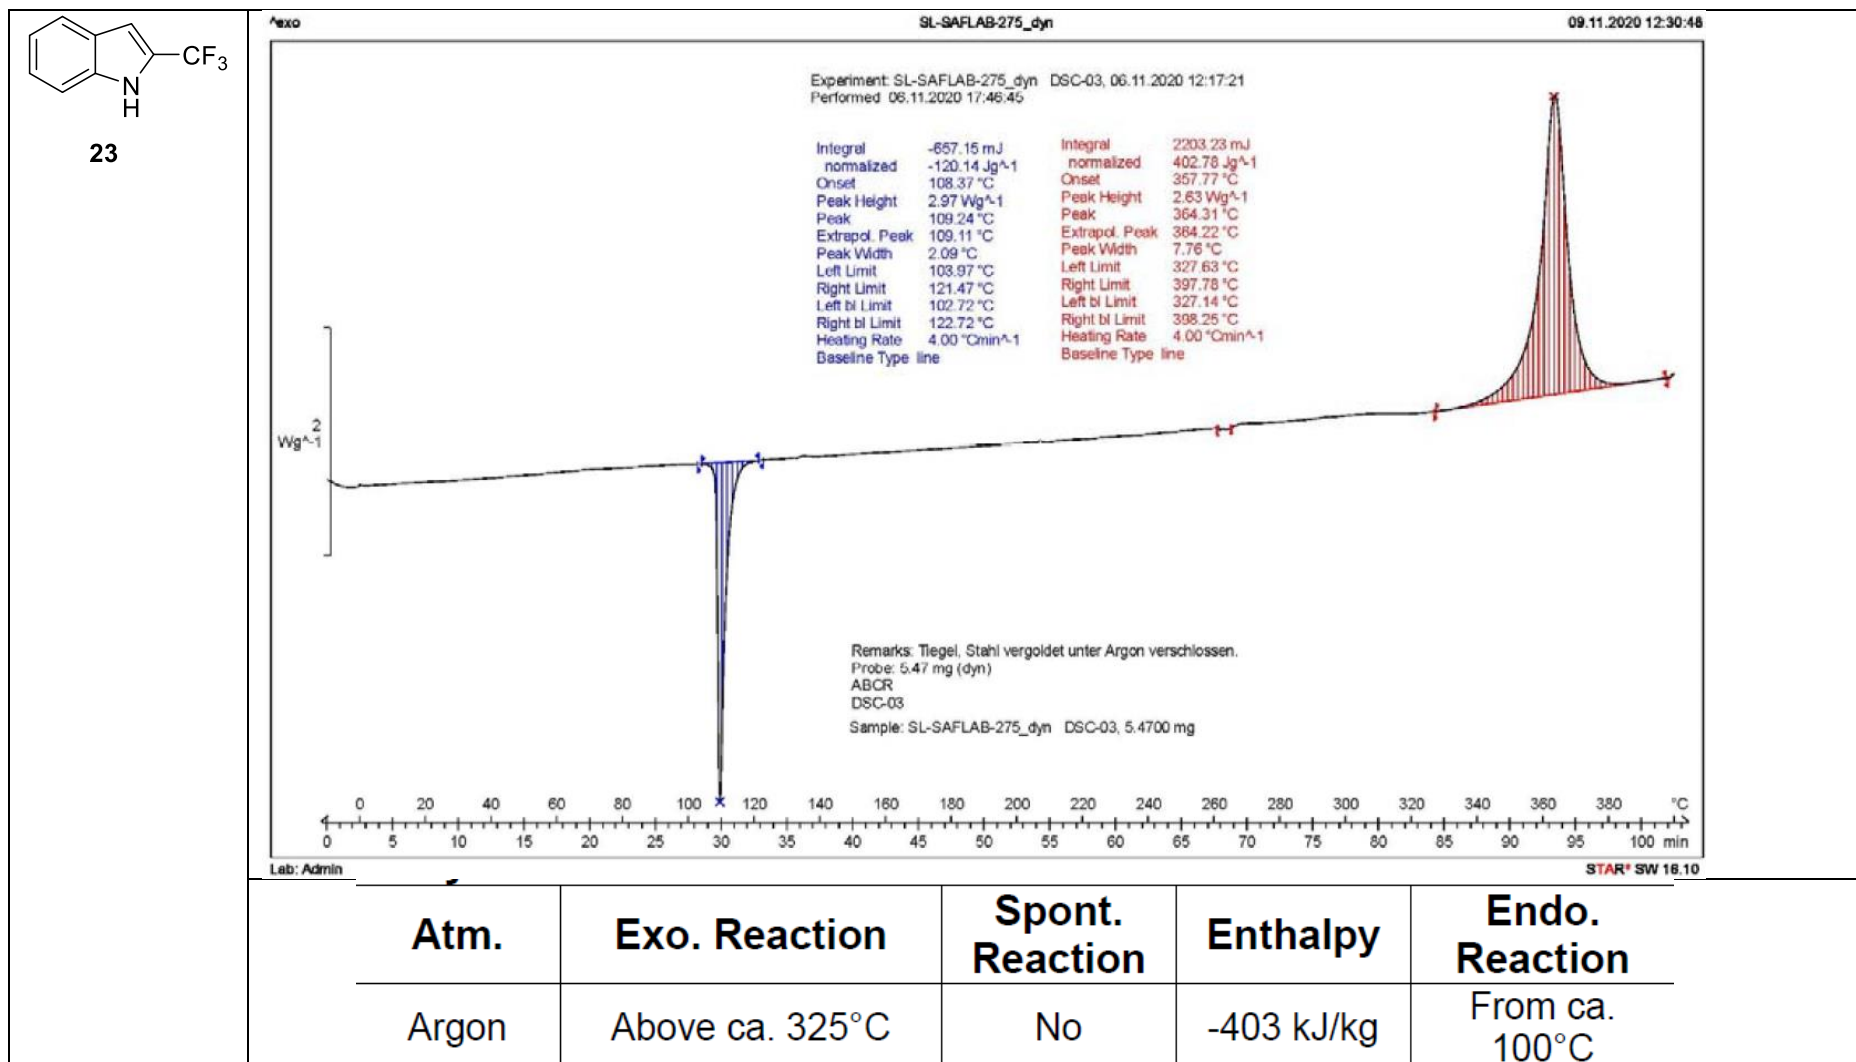

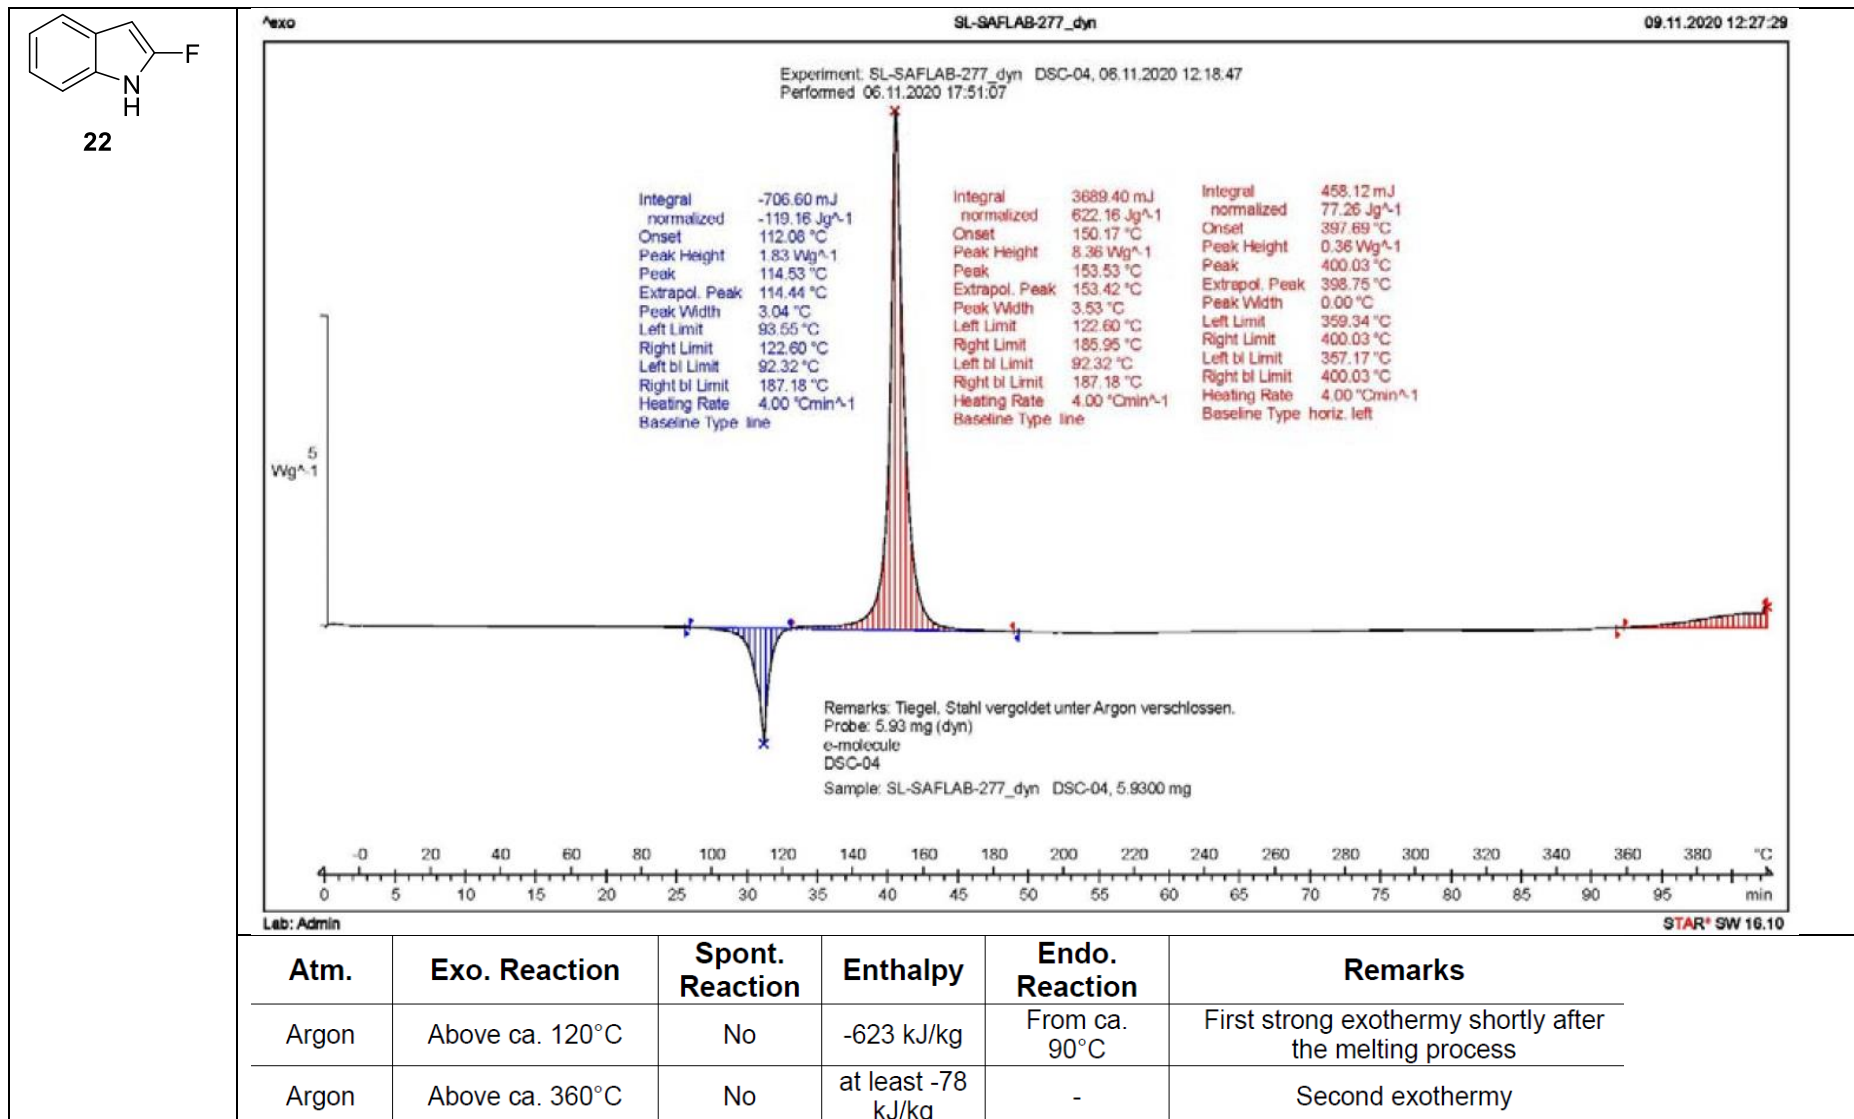

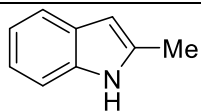

21

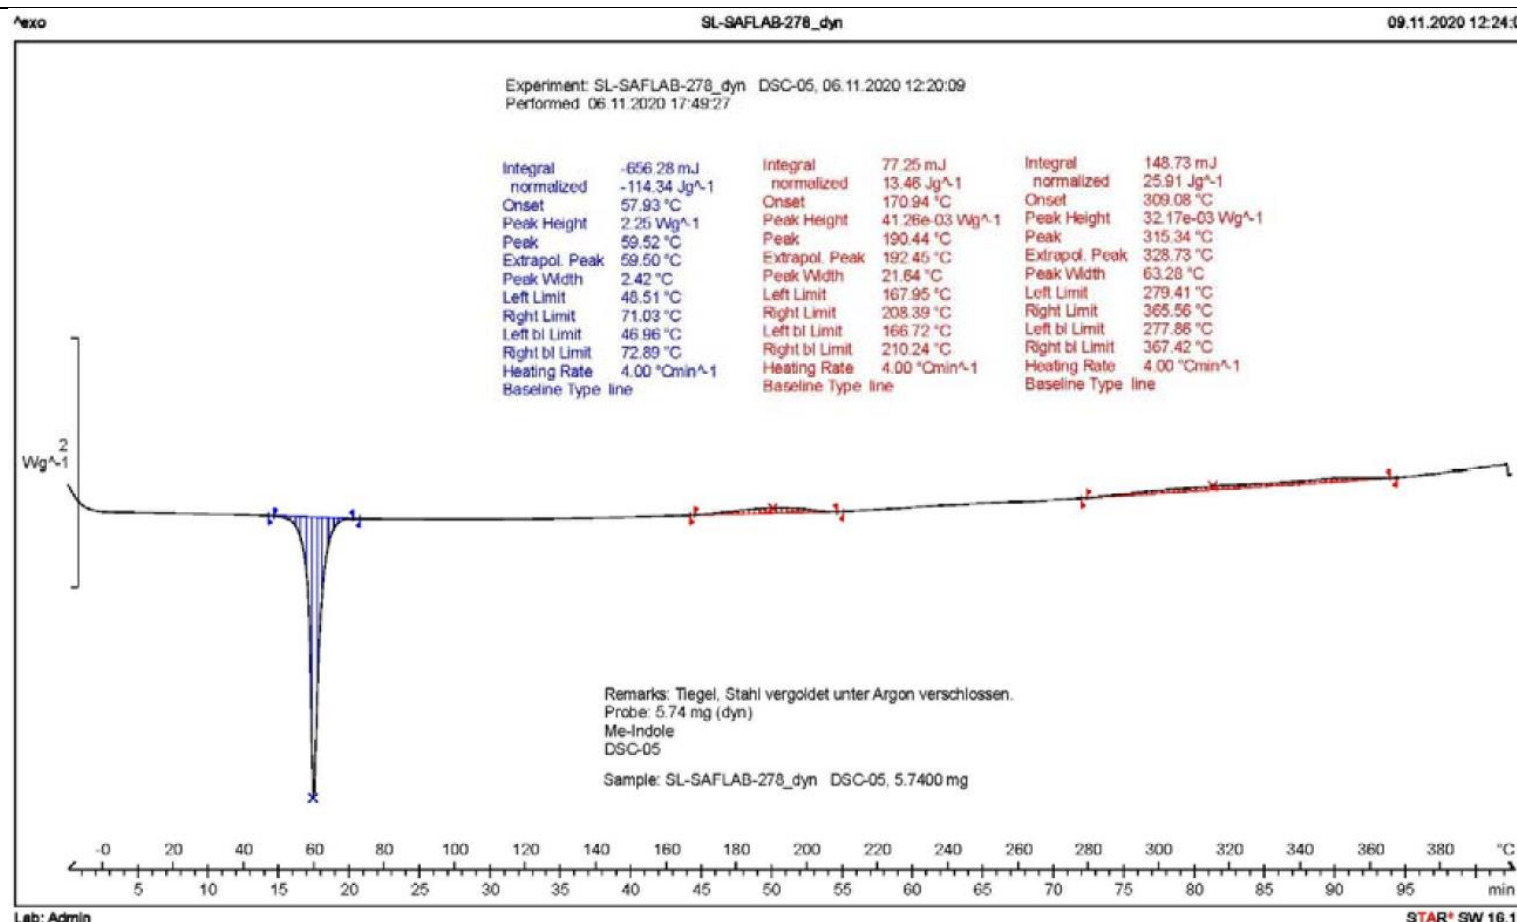

| Atm.  | Exo. Reaction   | Spont. Reaction | Enthalpy  | Endo. Reaction | Remarks                   |
|-------|-----------------|-----------------|-----------|----------------|---------------------------|
| Argon | Above ca. 165°C | No              | -14 kJ/kg | From ca. 45°C  | First very weak exothermy |
| Argon | Above ca. 200°C | No              | -26 kJ/kg | -              | Second weak exothermy     |

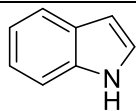

20

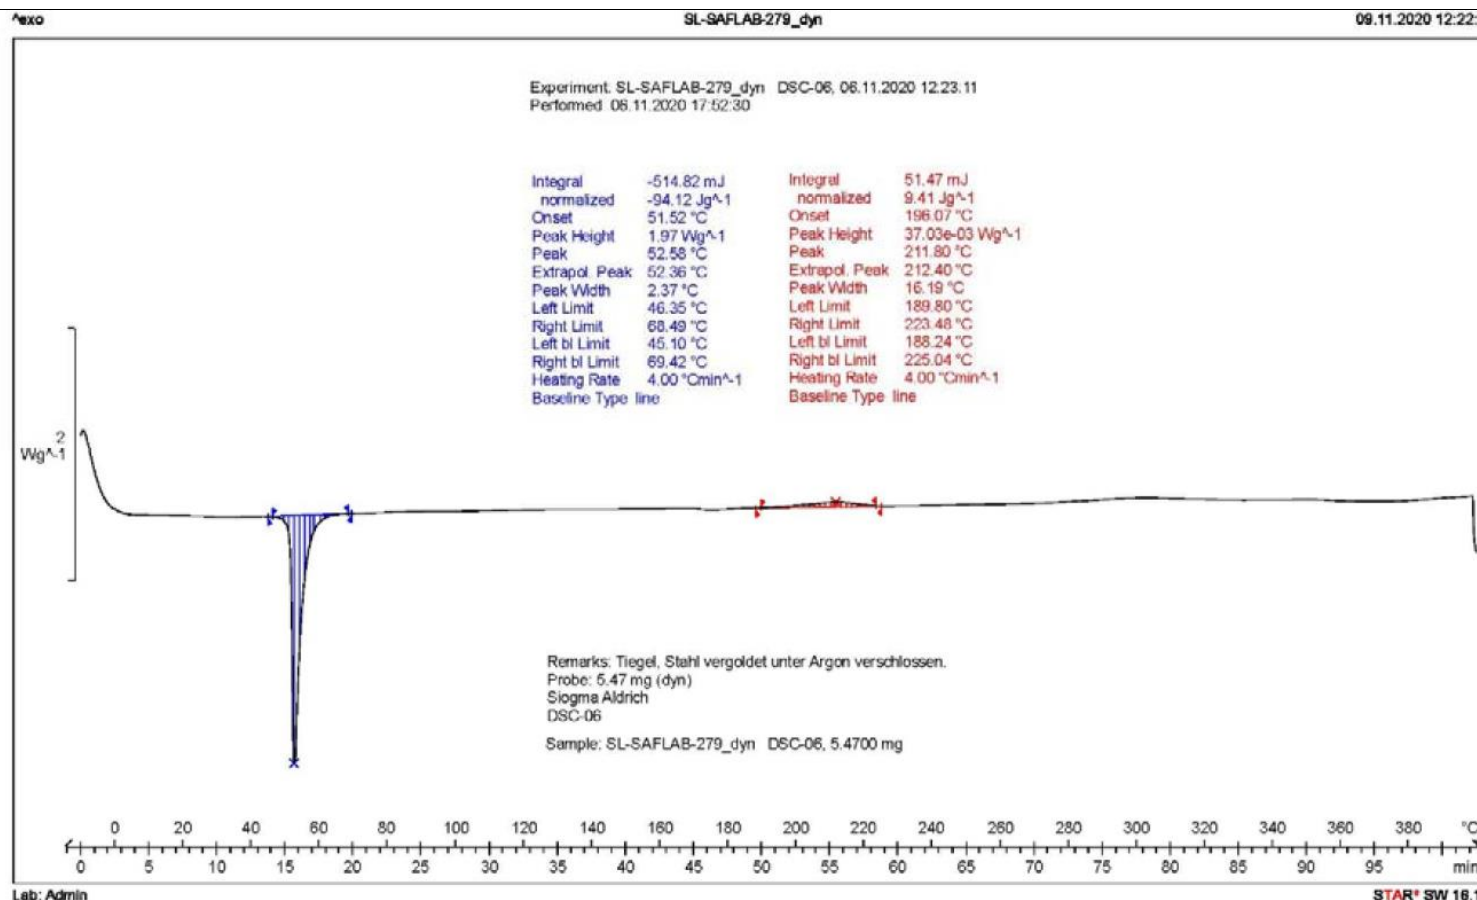

| Atm.  | Exo. Reaction    | Spont. Reaction | Enthalpy  | Endo. Reaction | Remarks             |
|-------|------------------|-----------------|-----------|----------------|---------------------|
| Argon | Above ca. 190 °C | No              | -10 kJ/kg | From ca. 45 °C | Very weak exothermy |



## In-Silico Assessment :

| Compound                                                             | ICH M7 Class <sup>2</sup> | Summary of the results and conclusions                                                                                                                                                                                                                                                                                                                                                                                                                                                                                                                                                                                                     |
|----------------------------------------------------------------------|---------------------------|--------------------------------------------------------------------------------------------------------------------------------------------------------------------------------------------------------------------------------------------------------------------------------------------------------------------------------------------------------------------------------------------------------------------------------------------------------------------------------------------------------------------------------------------------------------------------------------------------------------------------------------------|
| 2-(pentafluoro- $\lambda^6$ -sulfaneyl)-1H-indole<br>No CAS          | Uncertain                 | No structural concern for mutagenicity detected in Derek. Outside domain in Sarah Nexus with one positive prediction hypothesis identified, which is based on indole moiety. Positive Case Ultra prediction was obtained with alerts that were located in indole moiety. Indole is considered to be non-mutagenic and therefore there is no mutagenicity concern emerging from the indole moiety itself. Uncovered fragments detected in all three systems (SF <sub>5</sub> moiety). Hence, due to incomplete coverage, it is recommended to perform an Ames test to evaluate potential mutagenic activity of the SF <sub>5</sub> fragment |
| 1-methyl-2-(pentafluoro- $\lambda^6$ -sulfaneyl)-1H-indole<br>No CAS | Uncertain                 | No structural concern for mutagenicity detected in Derek. Outside domain in Sarah Nexus with one positive prediction hypothesis identified that is based on indole moiety. Positive Case Ultra prediction was obtained with alerts that were located in indole moiety. Indole is considered to be non-mutagenic and therefore there is no mutagenicity concern emerging from the indole moiety. Uncovered fragments detected in all three systems (SF <sub>5</sub> moiety). Hence, due to incomplete coverage, it is recommended to perform an Ames test to evaluate potential mutagenic activity of the SF <sub>5</sub> moiety            |
| 2-trifluoromethylindole<br>CAS 51310-54-4                            | 4                         | No structural concern for mutagenicity detected using Derek and Sarah Nexus. Case Ultra gave a positive prediction; however, the same positive alerts were obtained for indole, which was shown to be non-mutagenic in Ames test. 2-trifluoromethylindole can therefore be considered as non-mutagenic impurity.                                                                                                                                                                                                                                                                                                                           |
| 2-difluoromethylindole<br>No CAS                                     | 4                         | No structural concern for mutagenicity detected in Derek and Sarah. Inconclusive result obtained in Case Ultra, however, detected positive alerts were also obtained for indole, which is considered non-mutagenic. Can be considered as non-mutagenic impurity.                                                                                                                                                                                                                                                                                                                                                                           |
| 2-fluoroindole<br>No CAS                                             | 4                         | No structural alert for mutagenicity detected in Derek. Positive Sarah prediction based on indole moiety. In addition, positive Case Ultra prediction was obtained with alerts that were also detected for indole. Considering that indole was shown to be non-mutagenic, 2-fluoroindole can be considered non-mutagenic.                                                                                                                                                                                                                                                                                                                  |
| 2-methyl-1H-indole<br>CAS 95-20-5                                    | 5                         | Not mutagenic in Ames test (EFSA, 2018) <sup>3</sup>                                                                                                                                                                                                                                                                                                                                                                                                                                                                                                                                                                                       |
| 1H-indole<br>CAS 120-72-9                                            | 5                         | Can be considered as a non-mutagenic compound (EFSA, 2018) <sup>3</sup>                                                                                                                                                                                                                                                                                                                                                                                                                                                                                                                                                                    |

**Class assignments of compounds (according to [Müller et al 2006](#))<sup>4</sup>**

- Class 1: Known mutagenic carcinogens
- Class 2: Known mutagens with unknown carcinogenic potential
- Class 3: Alerting structure, unrelated to the structure of the drug substance
- Class 4: Alerting structure, same alert in drug substance or compounds related to the drug substance (e.g., process intermediates) which have been tested and are non-mutagenic
- Class 5: No structural alerts, or alerting structure with sufficient data to demonstrate lack of mutagenicity

**Methodology & Computer systems**

- Derek Nexus, v. 6.1.0, KB 2020 1.0 (Lhasa Ltd. Leeds, UK)
- Sarah Nexus v. 3.1.0 Model 2020.1 (Lhasa Ltd. Leeds, UK)
- Case Ultra v. 1.8.0.2 (MultiCASE Inc, Beachwood, Ohio, USA)

## 7 Physico-chemical properties

### 7.1 pK<sub>a</sub> determination in acetonitrile

The experimental methodology and setup for the pK<sub>a</sub> determination in acetonitrile (MeCN) were essentially the same as described in more detail in a previous publication.<sup>5</sup> A brief description of the spectrophotometric titration method will be given here.

The pK<sub>a</sub> determination in acetonitrile is based on the determination of differences of pK<sub>a</sub> values of two acids of which one is a reference acid with a previously published pK<sub>a</sub> value, and the other is a compound with an unknown pK<sub>a</sub> value. In the present paper the acid with an unknown pK<sub>a</sub> value is a substituted indole. These indoles, as well as the reference acids are separately titrated to obtain the UV-Vis spectra of the protonated as well as their deprotonated forms. Then the same titration is done with a mixture consisting of an indole and a reference acid in the same solution. After mathematically treating the spectral data obtained from the titration of the mixture at multiple wavelengths using multilinear regression analysis the dissociation levels  $\alpha = [A^-]/([A^-] + [HA])$  of both acids in all the mixtures formed during titration are calculated and are then in turn used to calculate the differences of pK<sub>a</sub> values ( $\Delta pK_a$ ) of the indoles and the used reference acids according to the following equation:

$$\Delta pK_a = \log \frac{\alpha_1(1 - \alpha_2)}{\alpha_2(1 - \alpha_1)}$$

The pK<sub>a</sub> values of **2-F-indole**, **2-CF<sub>3</sub>-indole** and **2-SF<sub>5</sub>-indole** are calculated as a result of  $\Delta pK_a$  measurements against at least three different reference acids. Compounds with previously published pK<sub>a</sub> values in acetonitrile were used as reference acids.<sup>6</sup>

An Agilent Cary 60 spectrophotometer (scanning speed 600 nm/min) connected with optical fibre cables to an external cell compartment inside a MBraun Unilab glovebox filled with 99.999 % pure argon was used for the spectrophotometric titrations. This setup ensured that during all titrations the moisture and oxygen contents inside the glovebox were always under 10 ppm.

Methanesulfonic acid (Aldrich, 99+ %) was used to prepare the acidic titrant solution and *tert*-butylimino-tris(pyrrolidino)phosphorane (Aldrich, ≥97 %) or Phosphazene base P2-Et (Aldrich, ≥98.0%) were used to prepare the basic titrant. The concentration of the acidic titrant was in the range of 5.7 - 8.2·10<sup>-3</sup> mol L<sup>-1</sup> and the concentration of the basic titrant was 1.7 - 3.1·10<sup>-3</sup> mol L<sup>-1</sup>. The concentrations of the studied indoles were between 5.4 - 8.6·10<sup>-5</sup> mol L<sup>-1</sup> during the titrations.

Acetonitrile (Romil 190 SpS far UV/gradient quality) was used as solvent after drying with molecular sieves (3 Å) for at least 12 hours, which ensured a water content of under 6 ppm. Water content of the solvent was monitored using coulometric Karl Fischer titration.

**Table 1.**  $pK_a$  measurement results in acetonitrile

| Acid                           | Reference acid (Ref)                                                      | $pK_a$ (Ref) | $\Delta pK_a$ | $pK_a$ (Acid) | Assigned $pK_a$ |
|--------------------------------|---------------------------------------------------------------------------|--------------|---------------|---------------|-----------------|
| <b>2-SF<sub>5</sub>-indole</b> | (C <sub>6</sub> H <sub>5</sub> )(C <sub>6</sub> F <sub>5</sub> )CHCN      | 26.16        | 1.72          | 24.44         | <b>24.44</b>    |
|                                | 9-COOCH <sub>3</sub> -fluorene                                            | 23.54        | -0.95         | 24.49         |                 |
|                                | 2,3,4,5,6-(CF <sub>3</sub> ) <sub>5</sub> -aniline                        | 24.57        | 0.18          | 24.39         |                 |
| <b>2-CF<sub>3</sub>-indole</b> | (C <sub>6</sub> H <sub>5</sub> )(C <sub>6</sub> F <sub>5</sub> )CHCN      | 26.16        | -0.62         | 26.78         | <b>26.76</b>    |
|                                | (4-Me-C <sub>6</sub> F <sub>4</sub> )(C <sub>6</sub> H <sub>5</sub> )CHCN | 26.98        | 0.26          | 26.72         |                 |
|                                | C <sub>6</sub> F <sub>5</sub> NHCOCH <sub>3</sub>                         | 26.45        | -0.33         | 26.78         |                 |
| <b>2-F-indole</b>              | (4-Me-C <sub>6</sub> F <sub>4</sub> )(C <sub>6</sub> H <sub>5</sub> )CHCN | 26.98        | -0.17         | 27.15         | <b>27.20</b>    |
|                                | 9-C <sub>6</sub> F <sub>5</sub> -fluorene                                 | 28.14        | 0.90          | 27.24         |                 |
|                                | (C <sub>6</sub> H <sub>5</sub> )(C <sub>6</sub> F <sub>5</sub> )CHCN      | 26.16        | -1.05         | 27.21         |                 |
|                                | C <sub>6</sub> F <sub>5</sub> NHCOCH <sub>3</sub>                         | 26.45        | -0.68         | 27.13         |                 |

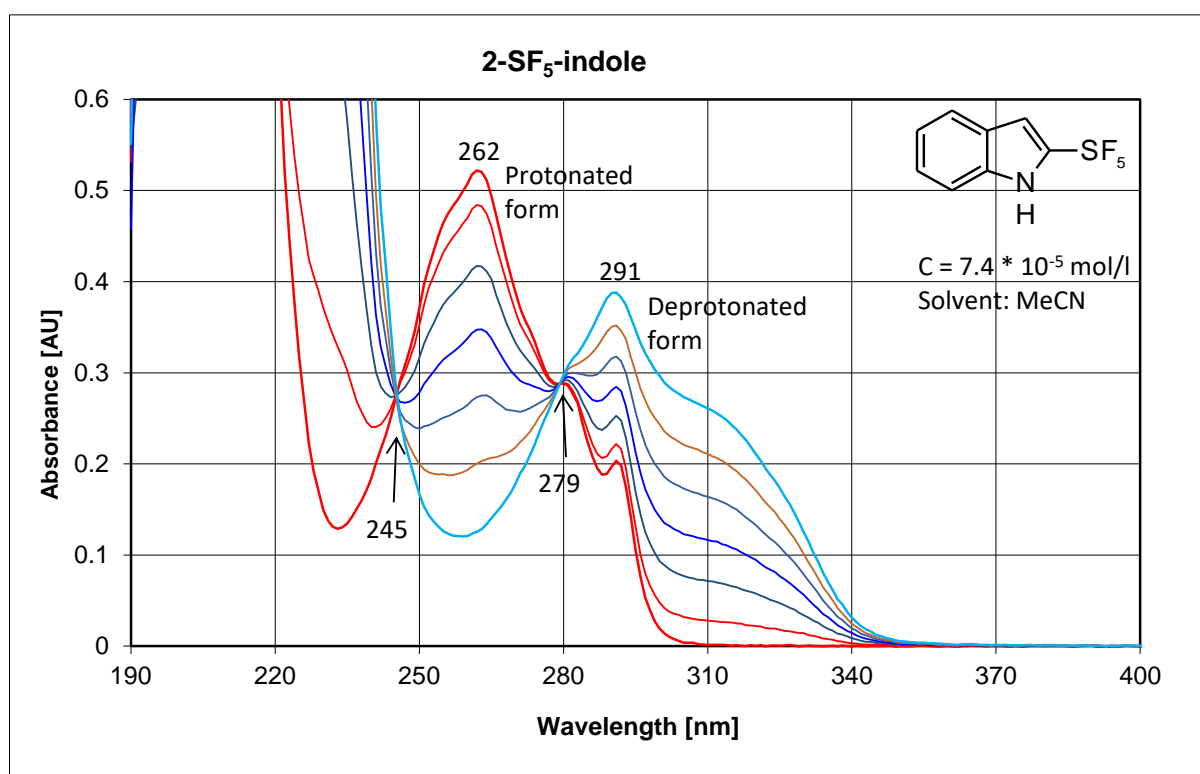

Figure 1. UV-Vis titration spectra of 2-SF<sub>5</sub>-indole

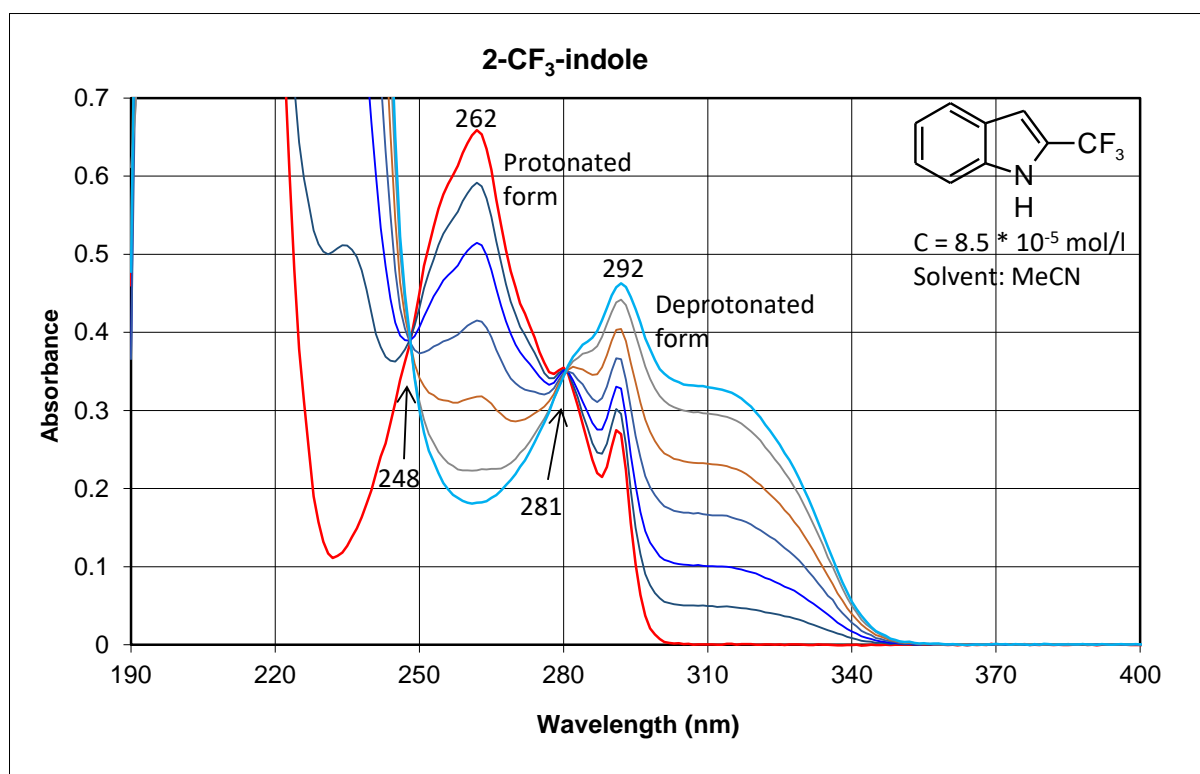Figure 2. UV-Vis titration spectra of 2-CF<sub>3</sub>-indole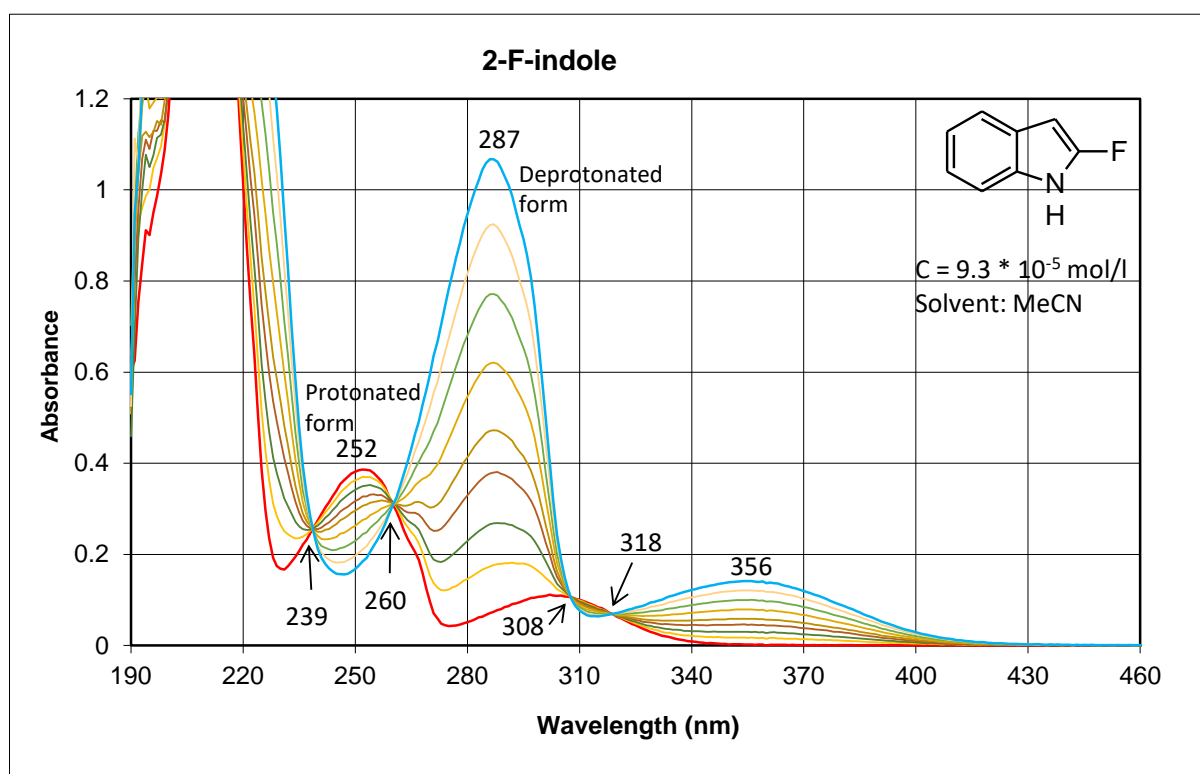

Figure 3. UV-Vis titration spectra of 2-F-indole

## 7.2 Log*P* measurements

The log*P* values in the 1-octanol/water system were determined using four approaches:

- I. **Direct determination by shake-flask method.**<sup>7</sup> The preferred approach, as it does not rely on assumptions or extrapolations. However, the used methodology is not very accurate for high (>3.5) and not applicable for very high log*P* values.

0.03-1.4 mg of the studied compound was combined in a chromatographic vial with 0.5 ml of 1-octanol (Sigma-Aldrich, ≥99%) and 0.5 ml of water and shaken for 45-50 min at ambient temperature (22°C). Both liquid phases were then analysed by RP-HPLC with UV-Vis detection and log*P* values were calculated from the ratio of peak areas in two phases. Please see ref. 7 for a more detailed description. Replicate measurements were carried out on three different days. Compounds were analysed individually (i.e. only one analyte in each vial) to avoid the effect of possible analyte-analyte interactions on the results.

- II. **Computationally supplemented chromatographic method.**

The retention factors of the studied compounds in C18 column at several different fractions of methanol in the eluent were measured and combined with some calculated descriptors to produce log*P* values. Please see ref 8 for details. The results are the averages of the three predictive equations derived in ref 8.

- III. **Correlation between chromatographic retention factors and lipophilicities** for a group of 7 structurally related compounds. This approach is better tuned to the compounds of interest compared to a more universal approach II.

Experimental procedure were as in ref 8.

- IV. Empirically corrected **COSMO-RS**<sup>9-11</sup> computations. COSMO-RS gives quite accurate log*P* predictions for small molecules.<sup>12</sup> Correlation between experimental (from lit.) and computational values for a group of similar compounds was used to confirm the accuracy and correct a minor systematic bias of calculated values.

Calculations were performed as described in ref 8.

The results are summarized in Table 1. Consensus values were assigned to compounds based on relative reliabilities of the used approaches in each case.

Table 1. Results of log*P* determination by different methods. *u* is an estimate of standard uncertainty.

| Compound                          | I ( $\pm u$ )       | II  | III | IV  | Assigned log <i>P</i> ( $\pm u$ ) |
|-----------------------------------|---------------------|-----|-----|-----|-----------------------------------|
| 2-Fluoroindole                    | 1.29 ( $\pm 0.01$ ) | 1.2 | 1.1 | 2.7 | 1.29 ( $\pm 0.05$ )               |
| 2-CF <sub>3</sub> -indole         | 3.64 ( $\pm 0.10$ ) | 3.3 | 3.4 | 3.5 | 3.5 ( $\pm 0.2$ )                 |
| 2-SF <sub>5</sub> -indole         | 3.75 ( $\pm 0.15$ ) | 3.7 | 3.7 | 3.9 | 3.8 ( $\pm 0.2$ )                 |
| 2-SF <sub>5</sub> -N-methylindole | -                   | 4.3 | 4.6 | 4.2 | 4.3 ( $\pm 0.3$ )                 |
| <b>Method's <i>u</i>:</b>         |                     | 0.3 | 0.3 | 0.2 |                                   |

## logP values of substituted indoles

## Summary

|                                   | Method: 1 (shake-flask) | 2 (HPLC) | 3 (HPLC) | 4 (COSMO-RS) | Consensus: u (estimate of standard uncertainty) |      |
|-----------------------------------|-------------------------|----------|----------|--------------|-------------------------------------------------|------|
| 2-Fluorindole                     | 1,29                    | 1,2      | 1,1      | 2,7          | 1,29                                            | 0,05 |
| 2-CF <sub>3</sub> -indole         | 3,6                     | 3,3      | 3,4      | 3,5          | 3,5                                             | 0,2  |
| 2-SF <sub>5</sub> -indole         | 3,8                     | 3,7      | 3,7      | 3,9          | 3,8                                             | 0,2  |
| 2-SF <sub>5</sub> -N-methylindole |                         | 4,3      | 4,6      | 4,2          | 4,3                                             | 0,3  |
| Method's u:                       | (varies)                | 0,3      | 0,3      | 0,2          |                                                 |      |

Method 1: Direct determination with shake-flask method. Methodology described in details in *ACS Omega* 2017, 2, 7772 (doi.org/10.1021/acsomega.7b01445)

|                           | Replicate determinations of logP * (less reliable in red) |       |       |       |       |       | Mean ** | St.dev(all) | St.dev(reliable) | Weighed st.dev. *** |
|---------------------------|-----------------------------------------------------------|-------|-------|-------|-------|-------|---------|-------------|------------------|---------------------|
|                           | day 1                                                     | day 2 | day 3 | day 1 | day 2 | day 3 |         |             |                  |                     |
| 2-Fluorindole             | 1,29                                                      | 1,29  | 1,28  | 1,29  | 1,28  | 1,30  | 1,29    | 0,01        | 0,01             | 0,01                |
| 2-CF <sub>3</sub> -indole | 3,71                                                      | 3,57  | 3,48  | 3,71  | 3,60  | 3,74  | 3,64    | 0,10        | 0,10             | 0,10                |
| 2-SF <sub>5</sub> -indole | 4,01                                                      | 3,73  | 3,77  | 4,13  | 3,75  | 4,19  | 3,75    | 0,20        | 0,02             | 0,15                |

\* Different values on the same day were obtained from the same solutions under different chromatographic conditions

\*\* Mean value was calculated from more reliable (black) values

\*\*\* Weighed estimate of standard error, see *ACS Omega* 2017, 2, 7772 for details

Method 2: using retention data and equations from *Anal. Chim. Acta* 2020, 1132, 123 (doi.org/10.1016/j.aca.2020.07.024)

|                                   | logk = f(v% MeOH) |       |       |       | PaDel descriptors |         |        |          |                | Predicted logP |      |      | Mean |
|-----------------------------------|-------------------|-------|-------|-------|-------------------|---------|--------|----------|----------------|----------------|------|------|------|
|                                   | 60                | 70    | 80    | 90    | Slope             | MLFER_E | nAtomP | nAtomLAC | McGowan_Volume | Eq.3           | Eq.4 | Eq.5 |      |
| 2-Fluorindole                     | -0,39             | -0,65 | -0,89 |       | -0,02             | 1,108   | 9      | 0        | 0,9641         | 1,2            | 1,4  | 1,1  | 1,2  |
| 2-CF <sub>3</sub> -indole         | 0,8               | 0,34  | -0,08 |       | -0,04             | 0,934   | 9      | 0        | 1,1404         | 3,3            | 3,5  | 3,1  | 3,3  |
| 2-SF <sub>5</sub> -indole         | 0,97              | 0,49  | 0,04  | -0,41 | -0,05             | 0,903   | 9      | 0        | 1,2844         | 3,7            | 3,8  | 3,5  | 3,7  |
| 2-SF <sub>5</sub> -N-methylindole |                   | 0,82  | 0,33  | -0,13 | -0,05             | 0,912   | 9      | 0        | 1,4253         | 4,3            | 4,3  | 4,3  | 4,3  |

RMSE(LOO) = 0,3

Method 3: using  $\log P = f(\log k)$  correlation for similar compounds

|                                   | $\log k_{80}$ | $\log P$ (Lit.) |
|-----------------------------------|---------------|-----------------|
| Indoxyl acetate                   | -0,59         | 2,01            |
| Indole                            | -0,48         | 2,21            |
| Triphenylamine                    | 0,75          | 5,74            |
| 1,4-Bis(trifluoromethyl)benzene   | 0,08          | 3,83            |
| Carbazole                         | -0,07         | 3,52            |
| Diphenylamine                     | -0,03         | 3,50            |
| (Fluorene - excluded) *           | 0,44          | 4,18            |
| <b>Predicted:</b>                 |               |                 |
| 2-Fluoroindole                    | -0,89         | 1,12            |
| 2-CF <sub>3</sub> -indole         | -0,08         | 3,41            |
| 2-SF <sub>5</sub> -indole         | 0,04          | 3,74            |
| 2-SF <sub>5</sub> -N-methylindole | 0,33          | 4,57            |

Expected standard uncertainty:

0,3

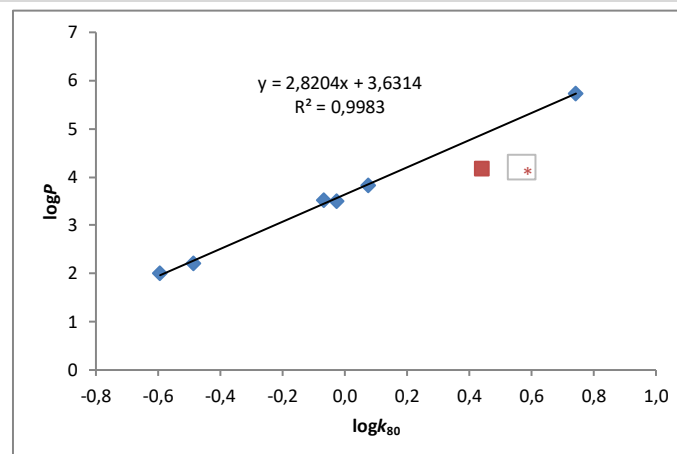

\* Reason for deviation is uncertain: possibly too different structure, possibly error of the method.  
Fluorene was not used for building correlation equation but taken into account when estimating uncertainty.

## Method 4: empirically corrected COSMO-RS calculations

|                                   | Calc. $\log P$ | Exp. $\log P$ (Lit.) |
|-----------------------------------|----------------|----------------------|
| Indoxyl acetate                   | 2,4            | 2,01                 |
| Indole                            | 2,4            | 2,21                 |
| Triphenylamine                    | 6,2            | 5,74                 |
| 1,4-Bis(trifluoromethyl)benzene   | 4,2            | 3,83                 |
| Carbazole                         | 3,8            | 3,52                 |
| Diphenylamine                     | 4,1            | 3,50                 |
| Fluorene                          | 4,3            | 4,18                 |
| <b>Predicted:</b>                 |                |                      |
| 2-Fluoroindole                    | 3,0            | 2,7                  |
| 2-CF <sub>3</sub> -indole         | 3,9            | 3,5                  |
| 2-SF <sub>5</sub> -indole         | 4,2            | 3,9                  |
| 2-SF <sub>5</sub> -N-methylindole | 4,5            | 4,2                  |

Expected standard uncertainty:

0,2

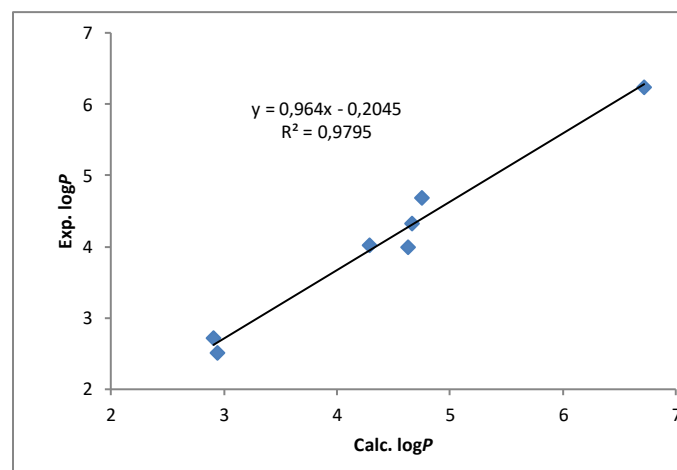



## 8 Ames test

---

### Test Item Information:

**Test item:** 2-(pentafluoro- $\lambda$ 6-sulfaneyl)-1H-indole

**Vehicle:** Dimethyl sulphoxide (DMSO)

**Purity/Content of drug:** >98%

### Molecular Structure:

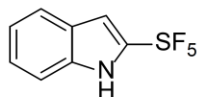

2-(pentafluoro- $\lambda$ 6-sulfaneyl)-1H-indole

Chemical Formula: C<sub>8</sub>H<sub>6</sub>F<sub>5</sub>NS

Molecular Weight: 243.20

### Conclusion:

Under the testing conditions used and applying standard mutagenicity criteria, 2-(pentafluoro- $\lambda$ 6-sulfaneyl)-1H-indole did not show evidence of a mutagenic potential in strains TA98, TA100, TA1535, TA97a or TA102 in the absence or presence of S-9.

### Results:

#### *Concentrations tested:*

- 16, 50, 160, 500, 1600 and 5000  $\mu$ g/plate (using all strains +/-S-9).

#### *Precipitation and toxicity:*

No precipitation of test article was observed on any of the test plates following incubation.

Evidence of toxicity, ranging from a thinning of the background bacterial lawn with a concurrent marked reduction in revertant numbers to a complete killing of the test bacteria, was observed in all strains in both the absence and presence of S-9 at concentrations of 500  $\mu$ g/plate and above.

#### *Mutagenicity:*

Data from control treatments confirmed the correct strain and assay functioning, and the data were accepted as valid.

Following treatment with 2-(pentafluoro- $\lambda$ 6-sulfaneyl)-1H-indole, there were no increases in the number of revertants of at least 2-fold (1.5-fold for strain TA102 or 3-fold for strain TA1535) the concurrent vehicle controls for any strains tested in the absence or presence of S-9.

**Analysis of Results:****Acceptance Criteria**

The assay was considered valid as all the following criteria were met:

1. Vehicle control counts fell within the normal ranges
2. The positive control chemicals induced increases in revertant numbers of  $\geq 1.5$ -fold (in strain TA102),  $\geq 2$ -fold (in strains TA98, TA100 and TA97a) or  $\geq 3$ -fold (for strain TA1535) the concurrent vehicle controls confirming discrimination between different strains, and an active S-9 preparation.

**Evaluation Criteria**

For valid data, the test item was considered mutagenic in this assay if:

A concentration related increase in revertant numbers of  $\geq 1.5$ -fold (in strain TA102),  $\geq 2$ -fold (in strains TA98, TA100 or TA97a) or  $\geq 3$ -fold (for strain TA1535) the concurrent vehicle control values was observed.

The test item was regarded positive in this assay if the above criterion was met.

The test item was regarded negative in this assay if the above criterion was not met.

**Methods:**

**Strains of *Salmonella typhimurium* Used:** TA98, TA100, TA1535, TA97a and TA102.

**Metabolic Activation System:** Liver S-9 mix from male rats,  $\beta$ -Naphthoflavone/Phenobarbital pretreated. Per plate, 0.5 mL of 10% S-9 mix was added.

**Controls:**

Vehicle control treatments comprised additions at the same volume per plate (0.1 mL) as the test item solutions. Positive control treatments comprised 0.05 mL volume additions. Negative controls comprised treatments with the chosen vehicle.

The positive control chemicals were supplied and used as shown in the following table:

| Chemical*                       | Stock**<br>concentration<br>( $\mu\text{g}/\text{mL}$ ) | Final<br>concentration<br>( $\mu\text{g}/\text{plate}$ ) | Use                  |     |
|---------------------------------|---------------------------------------------------------|----------------------------------------------------------|----------------------|-----|
|                                 |                                                         |                                                          | Strain(s)            | S-9 |
| 2-nitrofluorene (2NF)           | 100                                                     | 5                                                        | TA98                 | –   |
| Sodium azide ( $\text{NaN}_3$ ) | 40                                                      | 2                                                        | TA100, TA1535        | –   |
| 9-Aminoacridine (AAC)           | 2000                                                    | 100                                                      | TA97a                | –   |
| Mitomycin C (MMC)               | 4                                                       | 0.2                                                      | TA102                | –   |
| Benzo[a]pyrene (B[a]P)          | 200                                                     | 10                                                       | TA98                 | +   |
| 2-aminoanthracene (AAN)         | 100                                                     | 5                                                        | TA100, TA1535, TA97a | +   |
|                                 | 400                                                     | 20                                                       | TA102                | +   |

\* Obtained from Sigma-Aldrich.

\*\* Stock solutions were formulated in water ( $\text{NaN}_3$  and MMC), or in DMSO (2NF, AAC, AAN and B[a]P). Unless used on the day of preparation, all stock solutions were stored in aliquots protected from light at 2-8°C, with the exception of B[a]P and MMC which were stored in aliquots at <-50°C.

## Raw Plate Counts, Toxicity Data and Calculated Mutagenicity Data

**Table 1** 2-(pentafluoro- $\lambda$ 6-sulfaneyl)-1H-indole Raw Plate Counts, Toxicity Data and Calculated Mutagenicity Data, –S-9

| Strain           | Test Item                                        | Conc. Level ( $\mu$ g/plate)                     | Mean   | Fold Increase | Revertant Numbers Per Plate |               |
|------------------|--------------------------------------------------|--------------------------------------------------|--------|---------------|-----------------------------|---------------|
| TA98             | DMSO                                             | -                                                | 26.0   | -             | 28, 21, 29                  |               |
|                  | 2-(pentafluoro- $\lambda$ 6-sulfaneyl)-1H-indole | 16                                               | 29.0   | 1.1           | 27, 32, 28                  |               |
|                  |                                                  | 50                                               | 27.3   | 1.1           | 24, 22, 36                  |               |
|                  |                                                  | 160                                              | 26.3   | 1.0           | 24, 30, 25                  |               |
|                  |                                                  | 500                                              | -      | -             | - T, - T, - T               |               |
|                  |                                                  | 1600                                             | -      | -             | - T, - T, - T               |               |
|                  |                                                  | 5000                                             | -      | -             | - T, - T, - T               |               |
|                  | 2NF                                              | 5                                                | 897.0  | 34.5          | 947, 865, 879               |               |
|                  | TA100                                            | DMSO                                             | -      | 115.7         | -                           | 114, 115, 118 |
|                  |                                                  | 2-(pentafluoro- $\lambda$ 6-sulfaneyl)-1H-indole | 16     | 116.3         | 1.0                         | 117, 111, 121 |
| 50               |                                                  |                                                  | 128.3  | 1.1           | 122, 129, 134               |               |
| 160              |                                                  |                                                  | 129.7  | 1.1           | 139, 122, 128               |               |
| 500              |                                                  |                                                  | -      | -             | - T, - T, - T               |               |
| 1600             |                                                  |                                                  | -      | -             | - T, - T, - T               |               |
| 5000             |                                                  |                                                  | -      | -             | - T, - T, - T               |               |
| NaN <sub>3</sub> |                                                  | 2                                                | 1458.3 | 12.6          | 1477, 1466, 1432            |               |
| TA1535           | DMSO                                             | -                                                | 25.7   | -             | 23, 24, 30                  |               |
|                  | 2-(pentafluoro- $\lambda$ 6-sulfaneyl)-1H-indole | 16                                               | 23.7   | 0.9           | 29, 17, 25                  |               |
|                  |                                                  | 50                                               | 25.0   | 1.0           | 29, 26, 20                  |               |
|                  |                                                  | 160                                              | 27.3   | 1.1           | 25, 26, 31                  |               |
|                  |                                                  | 500                                              | -      | -             | - T, - T, - T               |               |
|                  |                                                  | 1600                                             | -      | -             | - T, - T, - T               |               |
|                  |                                                  | 5000                                             | -      | -             | - T, - T, - T               |               |
|                  | NaN <sub>3</sub>                                 | 2                                                | 1283.0 | 50.0          | 1287, 1346, 1216            |               |
| TA97a            | DMSO                                             | -                                                | 98.7   | -             | 89, 103, 104                |               |
|                  | 2-(pentafluoro- $\lambda$ 6-sulfaneyl)-1H-indole | 16                                               | 106.3  | 1.1           | 108, 97, 114                |               |
|                  |                                                  | 50                                               | 91.0   | 0.9           | 87, 76, 110                 |               |
|                  |                                                  | 160                                              | 88.3   | 0.9           | 83, 90, 92                  |               |
|                  |                                                  | 500                                              | -      | -             | - T, - T, - T               |               |
|                  |                                                  | 1600                                             | -      | -             | - T, - T, - T               |               |
|                  |                                                  | 5000                                             | -      | -             | - T, - T, - T               |               |
|                  | AAC                                              | 100                                              | 1812.7 | 18.4          | 1801, 1877, 1760            |               |

Table continued overleaf

**Table 1 Continued 2-(pentafluoro- $\lambda$ 6-sulfanyl)-1H-indole Raw Plate Counts, Toxicity Data and Calculated Mutagenicity Data, –S-9**

| Strain | Test Item                                       | Conc. Level<br>( $\mu$ g/plate) | Mean   | Fold Increase | Revertant Numbers Per Plate |
|--------|-------------------------------------------------|---------------------------------|--------|---------------|-----------------------------|
| TA102  | DMSO                                            | -                               | 236.0  | -             | 217, 261, 230               |
|        | 2-(pentafluoro- $\lambda$ 6-sulfanyl)-1H-indole | 16                              | 258.3  | 1.1           | 260, 264, 251               |
|        |                                                 | 50                              | 272.7  | 1.2           | 267, 262, 289               |
|        |                                                 | 160                             | 247.7  | 1.0           | 256, 255, 232               |
|        |                                                 | 500                             | -      | -             | - T, - T, - T               |
|        |                                                 | 1600                            | -      | -             | - T, - T, - T               |
|        |                                                 | 5000                            | -      | -             | - T, - T, - T               |
|        | MMC                                             | 0.2                             | 1511.7 | 6.4           | 1485, 1402, 1648            |

| Positive Controls |                 | Postfixes |                              |
|-------------------|-----------------|-----------|------------------------------|
| 2NF               | 2-nitrofluorene | T         | Toxic, no revertant colonies |
| NaN <sub>3</sub>  | Sodium azide    |           |                              |
| AAC               | 9-Aminoacridine |           |                              |
| MMC               | Mitomycin C     |           |                              |

**Table 2** 2-(pentafluoro- $\lambda$ 6-sulfaneyl)-1H-indole Raw Plate Counts, Toxicity Data and Calculated Mutagenicity Data, +S-9

| Strain | Test Item                                        | Conc. Level ( $\mu$ g/plate) | Mean   | Fold Increase | Revertant Numbers Per Plate |
|--------|--------------------------------------------------|------------------------------|--------|---------------|-----------------------------|
| TA98   | DMSO                                             | -                            | 31.7   | -             | 39, 29, 27                  |
|        | 2-(pentafluoro- $\lambda$ 6-sulfaneyl)-1H-indole | 16                           | 27.0   | 0.9           | 23, 33, 25                  |
|        |                                                  | 50                           | 25.3   | 0.8           | 29, 20, 27                  |
|        |                                                  | 160                          | 31.0   | 1.0           | 26, 28, 39                  |
|        |                                                  | 500                          | 16.7   | 0.5           | 16 M S, 25 M S, 9 M S       |
|        |                                                  | 1600                         | -      | -             | - T, - T, - T               |
|        |                                                  | 5000                         | -      | -             | - T, - T, - T               |
|        | B[a]P                                            | 10                           | 210.0  | 6.6           | 208, 215, 207               |
| TA100  | DMSO                                             | -                            | 99.0   | -             | 97, 95, 105                 |
|        | 2-(pentafluoro- $\lambda$ 6-sulfaneyl)-1H-indole | 16                           | 110.0  | 1.1           | 101, 97, 132                |
|        |                                                  | 50                           | 109.7  | 1.1           | 90, 120, 119                |
|        |                                                  | 160                          | 117.3  | 1.2           | 124, 106, 122               |
|        |                                                  | 500                          | 38.7   | 0.4           | 37 M S, 32 M S, 47 M S      |
|        |                                                  | 1600                         | -      | -             | - T, - T, - T               |
|        |                                                  | 5000                         | -      | -             | - T, - T, - T               |
|        | AAN                                              | 5                            | 2713.3 | 27.4          | 2666, 3067, 2407            |
| TA1535 | DMSO                                             | -                            | 13.7   | -             | 12, 13, 16                  |
|        | 2-(pentafluoro- $\lambda$ 6-sulfaneyl)-1H-indole | 16                           | 18.7   | 1.4           | 18, 12, 26                  |
|        |                                                  | 50                           | 16.7   | 1.2           | 18, 19, 13                  |
|        |                                                  | 160                          | 17.3   | 1.3           | 21, 7, 24                   |
|        |                                                  | 500                          | 5.0    | 0.4           | 6 M S, 6 M S, 3 M S         |
|        |                                                  | 1600                         | -      | -             | - T, - T, - T               |
|        |                                                  | 5000                         | -      | -             | - T, - T, - T               |
|        | AAN                                              | 5                            | 43.7   | 3.2           | 51, 39, 41                  |
| TA97a  | DMSO                                             | -                            | 114.7  | -             | 118, 124, 102               |
|        | 2-(pentafluoro- $\lambda$ 6-sulfaneyl)-1H-indole | 16                           | 108.3  | 0.9           | 103, 88, 134                |
|        |                                                  | 50                           | 109.7  | 1.0           | 117, 115, 97                |
|        |                                                  | 160                          | 103.0  | 0.9           | 98, 96, 115                 |
|        |                                                  | 500                          | -      | -             | - T, - T, - T               |
|        |                                                  | 1600                         | -      | -             | - T, - T, - T               |
|        |                                                  | 5000                         | -      | -             | - T, - T, - T               |
|        | AAN                                              | 5                            | 650.0  | 5.7           | 632, 745, 573               |

Table continued overleaf

**Table 2 Continued 2-(pentafluoro-λ6-sulfaneyl)-1H-indole Raw Plate Counts, Toxicity Data and Calculated Mutagenicity Data, +S-9**

| Strain | Test Item                              | Conc. Level (μg/plate) | Mean   | Fold Increase | Revertant Numbers Per Plate |
|--------|----------------------------------------|------------------------|--------|---------------|-----------------------------|
| TA102  | DMSO                                   | -                      | 349.3  | -             | 352, 340, 356               |
|        | 2-(pentafluoro-λ6-sulfaneyl)-1H-indole | 16                     | 338.7  | 1.0           | 363, 350, 303               |
|        |                                        | 50                     | 331.7  | 0.9           | 313, 344, 338               |
|        |                                        | 160                    | 278.0  | 0.8           | 250, 320, 264               |
|        |                                        | 500                    | -      | -             | - T, - T, - T               |
|        |                                        | 1600                   | -      | -             | - T, - T, - T               |
|        |                                        | 5000                   | -      | -             | - T, - T, - T               |
|        | AAN                                    | 20                     | 3795.7 | 10.9          | 4163, 3245, 3979            |

## Positive Controls

## Postfixes

|       |                   |   |                                              |
|-------|-------------------|---|----------------------------------------------|
| B[a]P | Benzo[a]pyrene    | M | Plate counted manually                       |
| AAN   | 2-aminoanthracene | S | Slight thinning of background bacterial lawn |
|       |                   | T | Toxic, no revertant colonies                 |

**Test Item Information:****Test item:** 1-methyl-2-(pentafluoro- $\lambda$ 6-sulfaneyl)-1H-indole**Vehicle:** Dimethyl sulphoxide (DMSO)**Purity/Content of drug:** >98%**Molecular Structure:**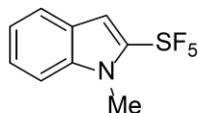1-methyl-2-(pentafluoro- $\lambda$ 6-sulfaneyl)-1H-indoleChemical Formula: C<sub>9</sub>H<sub>8</sub>F<sub>5</sub>NS

Molecular Weight: 257.22

**Conclusion:**

Under the testing conditions used and applying standard mutagenicity criteria, 1-methyl-2-(pentafluoro- $\lambda$ 6-sulfaneyl)-1H-indole did not show evidence of a mutagenic potential in strains TA98, TA100, TA1535, TA97a or TA102 in either the absence or presence of S-9.

**Results:****Concentrations tested:**

- 16, 50, 160, 500, 1600 and 5000  $\mu$ g/plate (using all strains +/-S-9).

**Precipitation and toxicity:**

The test article was completely soluble in the aqueous assay system at all concentrations tested.

Evidence of toxicity in the form of a thinning of the background bacterial lawn, with or without a concurrent marked reduction in revertant numbers, was observed in all strains in the absence and presence of S-9, and occurred on all plates treated at 1600  $\mu$ g/plate and above, and in some cases also on plates treated at 500  $\mu$ g/plate.

**Mutagenicity:**

Data from control treatments confirmed the correct strain and assay functioning, and the data were accepted as valid.

Following treatment with 1-methyl-2-(pentafluoro- $\lambda$ 6-sulfaneyl)-1H-indole, there were no increases in the number of revertants of at least 2-fold (1.5-fold for strain TA102 or 3-fold for strain TA1535) the concurrent vehicle controls for any strains tested in the absence or presence of S-9.

**Analysis of Results:****Acceptance Criteria**

The assay was considered valid as all the following criteria were met:

1. Vehicle control counts fell within the normal ranges
2. The positive control chemicals induced increases in revertant numbers of  $\geq 1.5$ -fold (in strain TA102),  $\geq 2$ -fold (in strains TA98, TA100 and TA97a) or  $\geq 3$ -fold (for strain TA1535) the concurrent vehicle controls confirming discrimination between different strains, and an active S-9 preparation.

**Evaluation Criteria**

For valid data, the test item was considered mutagenic in this assay if:

A concentration related increase in revertant numbers of  $\geq 1.5$ -fold (in strain TA102),  $\geq 2$ -fold (in strains TA98, TA100 or TA97a) or  $\geq 3$ -fold (for strain TA1535) the concurrent vehicle control values was observed.

The test item was regarded positive in this assay if the above criterion was met.

The test item was regarded negative in this assay if the above criterion was not met.

**Methods:**

**Strains of *Salmonella typhimurium* Used:** TA98, TA100, TA1535, TA97a and TA102.

**Metabolic Activation System:** Liver S-9 mix from male rats,  $\beta$ -Naphthoflavone/Phenobarbital pretreated. Per plate, 0.5 mL of 10% S-9 mix was added.

**Controls:**

Vehicle control treatments comprised additions at the same volume per plate (0.1 mL) as the test item solutions. Positive control treatments comprised 0.05 mL volume additions. Negative controls comprised treatments with the chosen vehicle.

The positive control chemicals were supplied and used as shown in the following table:

| Chemical*                       | Stock**<br>concentration<br>( $\mu\text{g}/\text{mL}$ ) | Final<br>concentration<br>( $\mu\text{g}/\text{plate}$ ) | Use                  |     |
|---------------------------------|---------------------------------------------------------|----------------------------------------------------------|----------------------|-----|
|                                 |                                                         |                                                          | Strain(s)            | S-9 |
| 2-nitrofluorene (2NF)           | 100                                                     | 5                                                        | TA98                 | –   |
| Sodium azide ( $\text{NaN}_3$ ) | 40                                                      | 2                                                        | TA100, TA1535        | –   |
| 9-Aminoacridine (AAC)           | 2000                                                    | 100                                                      | TA97a                | –   |
| Mitomycin C (MMC)               | 4                                                       | 0.2                                                      | TA102                | –   |
| Benzo[a]pyrene (B[a]P)          | 200                                                     | 10                                                       | TA98                 | +   |
| 2-aminoanthracene (AAN)         | 100                                                     | 5                                                        | TA100, TA1535, TA97a | +   |
|                                 | 400                                                     | 20                                                       | TA102                | +   |

\* Obtained from Sigma-Aldrich.

\*\* Stock solutions were formulated in water ( $\text{NaN}_3$  and MMC), or in DMSO (2NF, AAC, AAN and B[a]P). Unless used on the day of preparation, all stock solutions were stored in aliquots protected from light at 2-8°C, with the exception of B[a]P and MMC which were stored in aliquots at  $< -50^\circ\text{C}$ .



## Raw Plate Counts, Toxicity Data and Calculated Mutagenicity Data

**Table 1** 1-methyl-2-(pentafluoro- $\lambda$ 6-sulfaneyl)-1H-indole Raw Plate Counts, Toxicity Data and Calculated Mutagenicity Data, –S-9

| Strain | Test Item                                                 | Conc. Level ( $\mu$ g/plate) | Mean   | Fold Increase | Revertant Numbers Per Plate |
|--------|-----------------------------------------------------------|------------------------------|--------|---------------|-----------------------------|
| TA98   | DMSO                                                      | -                            | 15.0   | -             | 19 M B, 11, 15              |
|        | 1-methyl-2-(pentafluoro- $\lambda$ 6-sulfaneyl)-1H-indole | 16                           | 18.3   | 1.2           | 20, 20 M B, 15              |
|        |                                                           | 50                           | 20.0   | 1.3           | 24, 24, 12                  |
|        |                                                           | 160                          | 19.0   | 1.3           | 22, 19, 16                  |
|        |                                                           | 500                          | 20.0   | 1.3           | 23, 17, 20                  |
|        |                                                           | 1600                         | 20.0   | 1.3           | 25 S, 15 S, 20 S            |
|        |                                                           | 5000                         | 18.0   | 1.2           | 18 M B S, 18 S, 18 S        |
|        | 2NF                                                       | 5                            | 944.7  | 63.0          | 927, 943, 964               |
| TA100  | DMSO                                                      | -                            | 119.0  | -             | 129, 102, 126               |
|        | 1-methyl-2-(pentafluoro- $\lambda$ 6-sulfaneyl)-1H-indole | 16                           | 103.0  | 0.9           | 91, 112, 106                |
|        |                                                           | 50                           | 93.0   | 0.8           | 101, 92, 86                 |
|        |                                                           | 160                          | 106.3  | 0.9           | 105, 117, 97                |
|        |                                                           | 500                          | 92.0   | 0.8           | 90, 98, 88                  |
|        |                                                           | 1600                         | 87.7   | 0.7           | 97 S, 85 S, 81 S            |
|        |                                                           | 5000                         | 69.7   | 0.6           | 61 S, 63 S, 85 S            |
|        | NaN <sub>3</sub>                                          | 2                            | 1088.7 | 9.1           | 1110, 1036, 1120            |
| TA1535 | DMSO                                                      | -                            | 11.7   | -             | 10, 17, 8                   |
|        | 1-methyl-2-(pentafluoro- $\lambda$ 6-sulfaneyl)-1H-indole | 16                           | 12.7   | 1.1           | 15, 15, 8                   |
|        |                                                           | 50                           | 11.7   | 1.0           | 10, 17, 8                   |
|        |                                                           | 160                          | 10.7   | 0.9           | 7, 17, 8                    |
|        |                                                           | 500                          | 15.0   | 1.3           | 8 S, 17 S, 20 S             |
|        |                                                           | 1600                         | 10.0   | 0.9           | 13 S, 8 S, 9 S              |
|        |                                                           | 5000                         | 8.3    | 0.7           | 8 S, 9 S, 8 S               |
|        | NaN <sub>3</sub>                                          | 2                            | 831.7  | 71.3          | 818, 833, 844               |
| TA97a  | DMSO                                                      | -                            | 93.3   | -             | 81, 92, 107                 |
|        | 1-methyl-2-(pentafluoro- $\lambda$ 6-sulfaneyl)-1H-indole | 16                           | 101.0  | 1.1           | 105, 91, 107                |
|        |                                                           | 50                           | 105.0  | 1.1           | 86, 108, 121                |
|        |                                                           | 160                          | 101.3  | 1.1           | 113, 100, 91                |
|        |                                                           | 500                          | 81.0   | 0.9           | 93, 82, 68                  |
|        |                                                           | 1600                         | 86.7   | 0.9           | 89 S, 78 S, 93 S            |
|        |                                                           | 5000                         | 84.3   | 0.9           | 86 S, 77 S, 90 S            |
|        | AAC                                                       | 100                          | 761.7  | 8.2           | 866, 605, 814               |

Table continued overleaf

**Table 1 Continued 1-methyl-2-(pentafluoro- $\lambda$ 6-sulfaneyl)-1H-indole Raw Plate Counts, Toxicity Data and Calculated Mutagenicity Data, –S-9**

| Strain | Test Item                                                 | Conc. Level ( $\mu$ g/plate) | Mean   | Fold Increase | Revertant Numbers Per Plate |
|--------|-----------------------------------------------------------|------------------------------|--------|---------------|-----------------------------|
| TA102  | DMSO                                                      | -                            | 250.0  | -             | 252, 236, 262               |
|        | 1-methyl-2-(pentafluoro- $\lambda$ 6-sulfaneyl)-1H-indole | 16                           | 266.0  | 1.1           | 279, 264, 255               |
|        |                                                           | 50                           | 232.0  | 0.9           | 235, 224, 237               |
|        |                                                           | 160                          | 202.0  | 0.8           | 187, 195, 224               |
|        |                                                           | 500                          | 206.7  | 0.8           | 209, 210, 201               |
|        |                                                           | 1600                         | 161.3  | 0.6           | 163 S, 150 S, 171 S         |
|        |                                                           | 5000                         | 162.3  | 0.6           | 177 S, 146 S, 164 S         |
|        | MMC                                                       | 0.2                          | 1093.7 | 4.4           | 1134, 1180, 967             |

## Positive Controls

## Postfixes

|                  |                 |   |                                              |
|------------------|-----------------|---|----------------------------------------------|
| 2NF              | 2-nitrofluorene | M | Plate counted manually                       |
| NaN <sub>3</sub> | Sodium azide    | B | Bubbles or split in agar                     |
| AAC              | 9-Aminoacridine | S | Slight thinning of background bacterial lawn |
| MMC              | Mitomycin C     |   |                                              |

**Table 2** 1-methyl-2-(pentafluoro- $\lambda$ 6-sulfaneyl)-1H-indole Raw Plate Counts, Toxicity Data and Calculated Mutagenicity Data, +S-9

| Strain | Test Item                                                 | Conc. Level<br>( $\mu$ g/plate) | Mean   | Fold Increase | Revertant Numbers Per Plate |
|--------|-----------------------------------------------------------|---------------------------------|--------|---------------|-----------------------------|
| TA98   | DMSO                                                      | -                               | 31.0   | -             | 27, 41, 25                  |
|        | 1-methyl-2-(pentafluoro- $\lambda$ 6-sulfaneyl)-1H-indole | 16                              | 24.0   | 0.8           | 23, 19, 30                  |
|        |                                                           | 50                              | 33.3   | 1.1           | 40, 30, 30                  |
|        |                                                           | 160                             | 20.3   | 0.7           | 20, 22, 19                  |
|        |                                                           | 500                             | 31.0   | 1.0           | 41, 22, 30                  |
|        |                                                           | 1600                            | 27.3   | 0.9           | 25 S, 25 S, 32 S            |
|        |                                                           | 5000                            | 24.7   | 0.8           | 24 S, 32 S, 18 S            |
|        | B[a]P                                                     | 10                              | 237.0  | 7.6           | 223, 253, 235               |
| TA100  | DMSO                                                      | -                               | 112.3  | -             | 120, 131, 86                |
|        | 1-methyl-2-(pentafluoro- $\lambda$ 6-sulfaneyl)-1H-indole | 16                              | 151.7  | 1.4           | 131, 148, 176               |
|        |                                                           | 50                              | 116.3  | 1.0           | 116, 119, 114               |
|        |                                                           | 160                             | 127.7  | 1.1           | 125, 133, 125               |
|        |                                                           | 500                             | 103.0  | 0.9           | 97, 107, 105                |
|        |                                                           | 1600                            | -      | -             | - U, - U, - U               |
|        |                                                           | 5000                            | 70.0   | 0.6           | 76 S, 73 S, 61 S            |
|        | AAN                                                       | 5                               | 2338.0 | 20.8          | 2108, 2564, 2342            |
| TA1535 | DMSO                                                      | -                               | 10.0   | -             | 8, 12, 10                   |
|        | 1-methyl-2-(pentafluoro- $\lambda$ 6-sulfaneyl)-1H-indole | 16                              | 16.3   | 1.6           | 19, 19, 11                  |
|        |                                                           | 50                              | 13.0   | 1.3           | 15, 12, 12                  |
|        |                                                           | 160                             | 13.3   | 1.3           | 11, 13, 16                  |
|        |                                                           | 500                             | 7.0    | 0.7           | 5 S, 7 S, 9 S               |
|        |                                                           | 1600                            | 12.7   | 1.3           | 10 S, 15 S, 13 S            |
|        |                                                           | 5000                            | 16.7   | 1.7           | 10 S, 16 S, 24 S            |
|        | AAN                                                       | 5                               | 65.7   | 6.6           | 63, 54, 80                  |
| TA97a  | DMSO                                                      | -                               | 162.7  | -             | 117, 237, 134               |
|        | 1-methyl-2-(pentafluoro- $\lambda$ 6-sulfaneyl)-1H-indole | 16                              | 116.0  | 0.7           | 109, 118, 121               |
|        |                                                           | 50                              | 102.3  | 0.6           | 110, 100, 97                |
|        |                                                           | 160                             | 95.3   | 0.6           | 110, 95, 81                 |
|        |                                                           | 500                             | 115.3  | 0.7           | 128, 117, 101               |
|        |                                                           | 1600                            | 100.3  | 0.6           | 95 S, 106 S, 100 S          |
|        |                                                           | 5000                            | 107.0  | 0.7           | 116 S, 111 S, 94 S          |
|        | AAN                                                       | 5                               | 578.7  | 3.6           | 591, 554, 591               |

Table continued overleaf

**Table 2 Continued 1-methyl-2-(pentafluoro- $\lambda$ 6-sulfaneyl)-1H-indole Raw Plate Counts, Toxicity Data and Calculated Mutagenicity Data, +S-9**

| Strain | Test Item                                                 | Conc. Level ( $\mu$ g/plate) | Mean   | Fold Increase | Revertant Numbers Per Plate |
|--------|-----------------------------------------------------------|------------------------------|--------|---------------|-----------------------------|
| TA102  | DMSO                                                      | -                            | 306.0  | -             | 299, 288, 331               |
|        | 1-methyl-2-(pentafluoro- $\lambda$ 6-sulfaneyl)-1H-indole | 16                           | 324.3  | 1.1           | 322, 307, 344               |
|        |                                                           | 50                           | 317.3  | 1.0           | 303, 314, 335               |
|        |                                                           | 160                          | 290.7  | 0.9           | 334, 285, 253               |
|        |                                                           | 500                          | 248.0  | 0.8           | 235 S, 255 S, 254 S         |
|        |                                                           | 1600                         | 234.0  | 0.8           | 246 S, 237 S, 219 S         |
|        |                                                           | 5000                         | 220.7  | 0.7           | 229 S, 217 S, 216 S         |
|        | AAN                                                       | 20                           | 2768.0 | 9.0           | 2819, 2625, 2860            |

## Positive Controls

## Postfixes

|       |                   |   |                                              |
|-------|-------------------|---|----------------------------------------------|
| B[a]P | Benzo[a]pyrene    | S | Slight thinning of background bacterial lawn |
| AAN   | 2-aminoanthracene | U | No data obtained                             |

## 9 References

1. For **GP1**: a) C. Shu, L. Li, X.-Y. Xiao, Y.-F. Yu, Y.-F. Ping, J.-M. Zhou, L.-W. Ye, *Chem. Commun.* **2014**, *50*, 8689-8692; b) Y. Ohta, H. Chiba, S. Oishi, N. Fujii H. Ohno, *J. Org. Chem.* **2009**, *18*, 7052-7058; c) TBAF/AcOH for deprotection of TMS: R. M. Coates, Z. Ho, M. Klobus, S. R. Wilson, *J. Am. Chem. Soc.* **1996**, *118*, 13065-13098; d) K<sub>2</sub>CO<sub>3</sub>/MeOH for deprotection of TMS: J. Lv, B. Zhao, L. Liu, Y. Han, Y. Yuan, Z. Shi, *Adv. Synth. Catal.* **2018**, *360*, 4054-4059.
2. ICH M7 (R1) guideline (2018), Assessment and Control of DNA Reactive (Mutagenic) Impurities in Pharmaceuticals to Limit Potential Carcinogenic Risk, Step 5 version, February 2018
3. EFSA (**2018**). EFSA CEF Panel (EFSA Panel on Food Contact Materials, Enzymes, Flavourings and Processing Aids). Silano V et al, Scientific opinion on flavouring group evaluation 77, revision 3 (FGE.77Rev3): consideration of pyridine, pyrrole and quinoline derivatives evaluated by JECFA (63rd meeting) structurally related to pyridine, pyrrole, indole and quinoline derivatives evaluated by EFSA in FGE.24Rev2. *EFSA Journal* **2018**; *16*(4):5226, 51.
4. Müller L, Mauthe RJ, Riley CM et al. : A rationale for determining, testing, and controlling specific impurities in pharmaceuticals that possess potential for genotoxicity. *Regul Toxicol Pharmacol* **2006**, *44*, 198-211.
5. A. Kütt, I. Leito, I. Kaljurand, L. Sooväli, V. M. Vlasov, L. M. Yagupolskii, I. A. Koppel. A Comprehensive Self-Consistent Spectrophotometric Acidity Scale of Neutral Brønsted Acids in Acetonitrile. *J. Org. Chem.* **2006**, *71*, 2829-2838.
6. A. Kütt, S. Tshepelevitsh, J. Saame, M. Lõkov, I. Kaljurand, S. Selberg, I. Leito. Strengths of Acids in Acetonitrile. *Eur. J. Org. Chem.* **2021**, 1407-1419.
7. S. Tshepelevitsh, K. Hernits, J. Jenčo, J. M. Hawkins, K. Muteki, P. Solich, I. Leito, *ACS Omega* **2017**, *2*, 7772-7776.
8. S. Tshepelevitsh, S. A. Kadam, A. Darnell, J. Bobacka, A. Rüütel, T. Haljasorg, I. Leito, *Anal. Chim. Acta* **2020**, *1132*, 123-133.
9. A. Klamt, V. Jonas, T. Bürger, J. C. W. Lohrenz, *J. Phys. Chem. A* **1998**, *102*, 5074-5085.
10. F. Eckert, A. Klamt, *AIChE J.* **2002**, *48*, 369-385.
11. A. Klamt, *J. Phys. Chem.* **1995**, *99*, 2224-2235.
12. S. Tshepelevitsh, K. Hernits, I. Leito, *J. Comput. Aided Mol. Des.* **2018**, *32*, 711-722.

## 10 NMR spectra

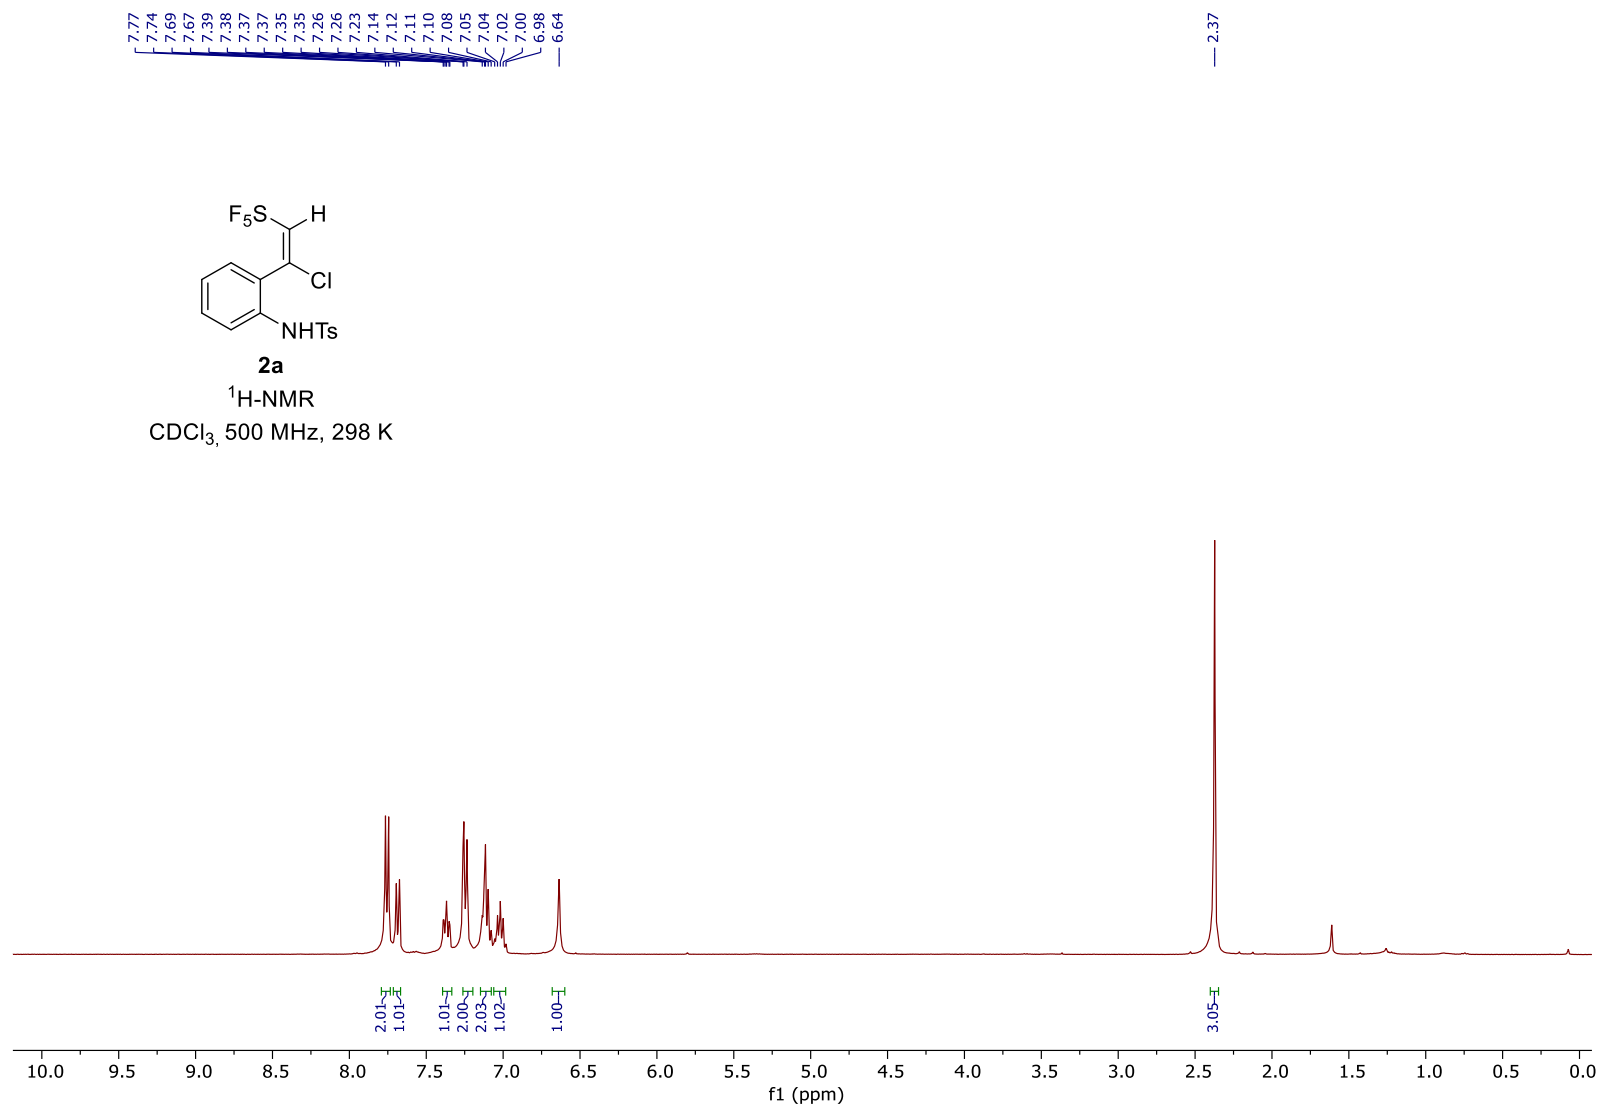

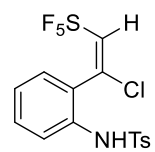**2a**<sup>13</sup>C-NMRCDCl<sub>3</sub>, 125 MHz, 298 K

144.55  
142.30  
142.13  
141.96  
141.79  
141.62  
138.95  
138.90  
138.85  
138.80  
138.74  
136.16  
133.65  
131.55  
129.81  
129.14  
127.61  
125.48  
124.18  
119.72

77.42  
77.16  
76.91

21.67

142.30  
142.13  
141.96  
141.79  
141.62

138.95  
138.90  
138.85  
138.80  
138.74

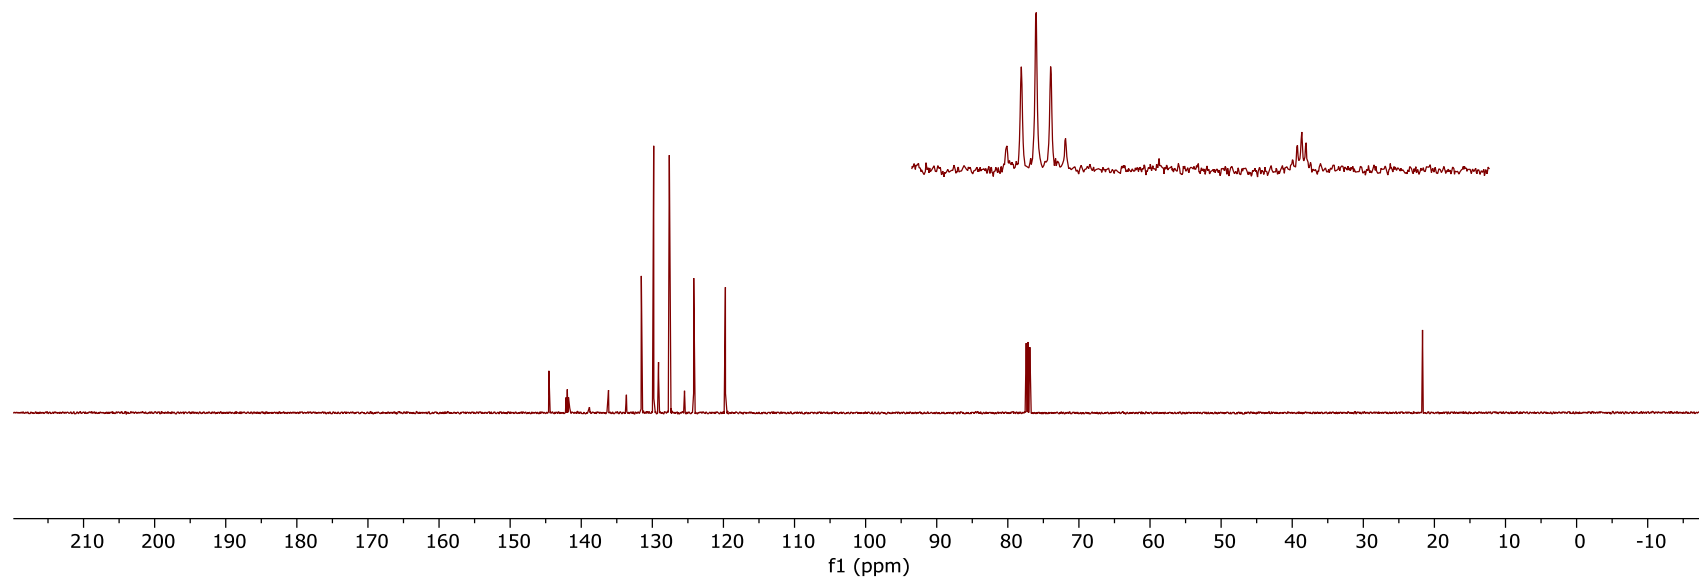

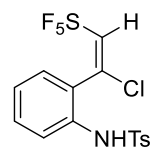**2a**

<sup>19</sup>F-NMR  
CDCl<sub>3</sub>, 471 MHz, 298 K

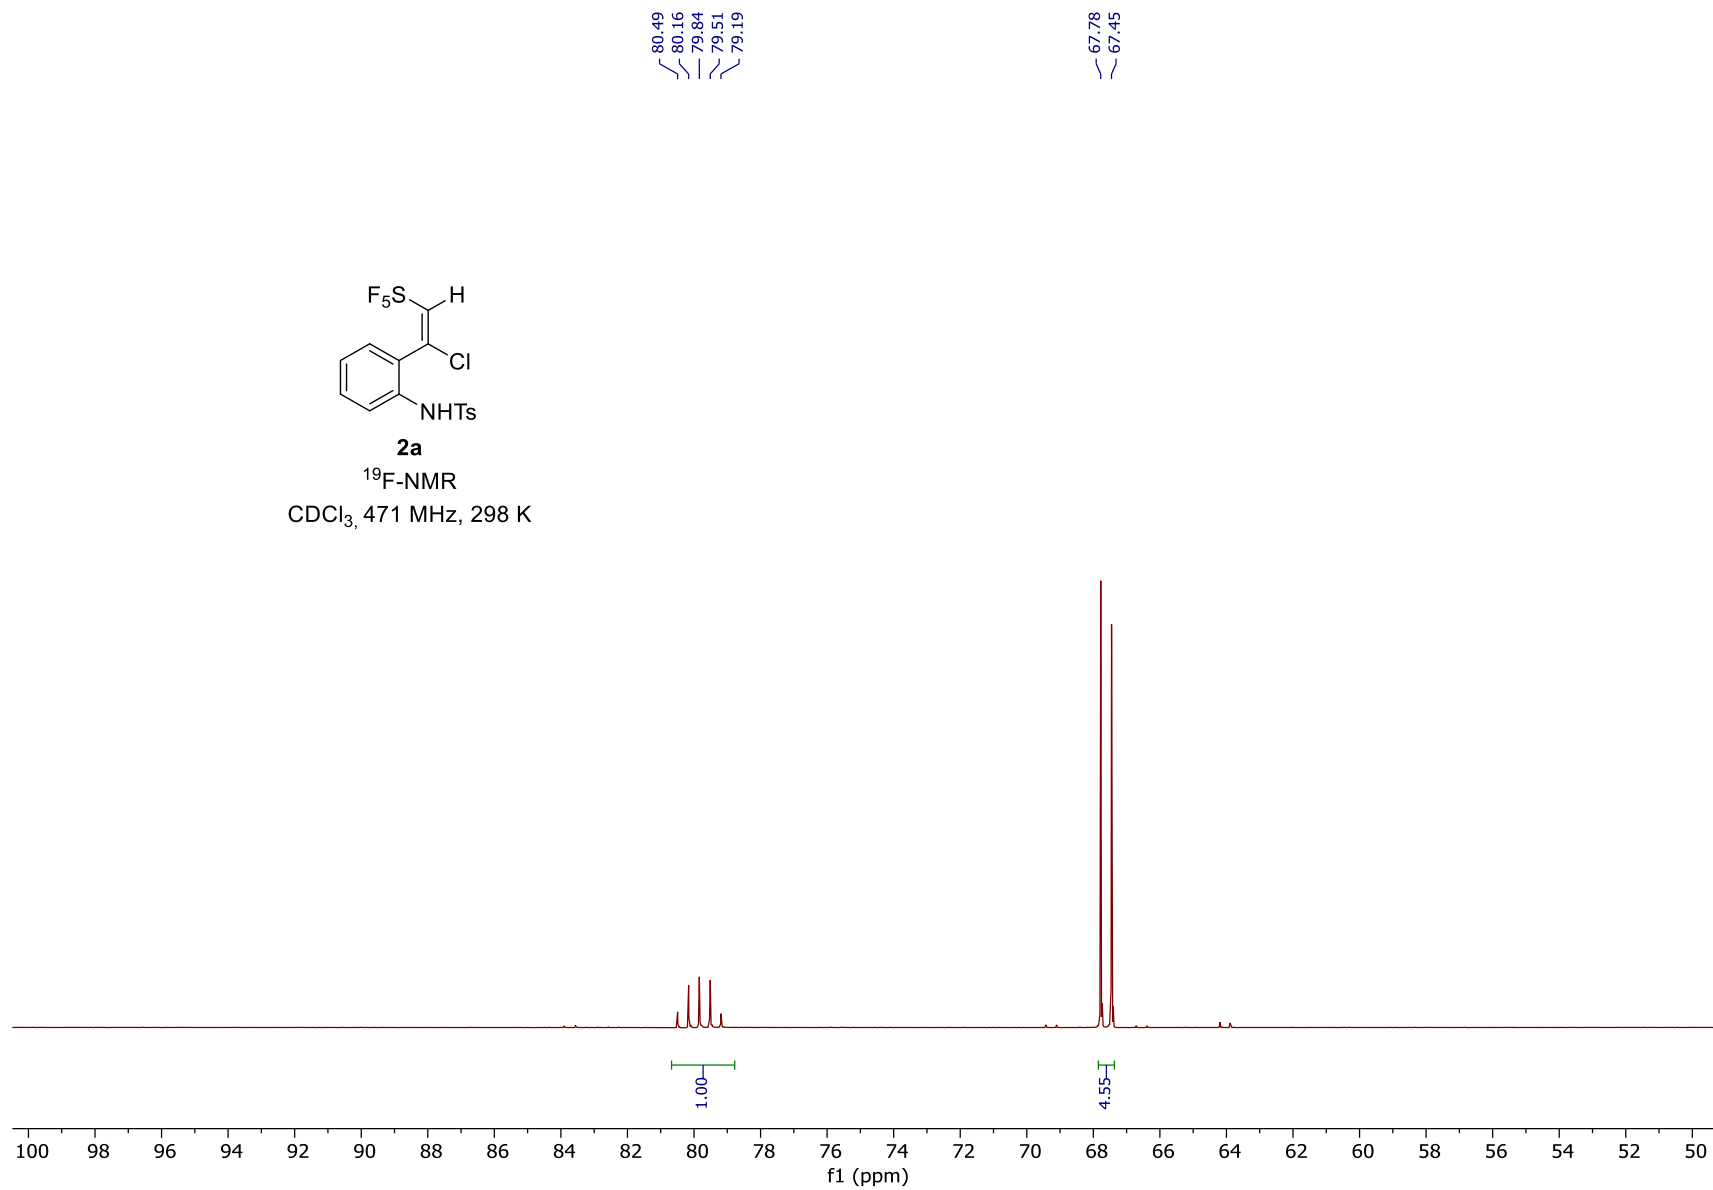



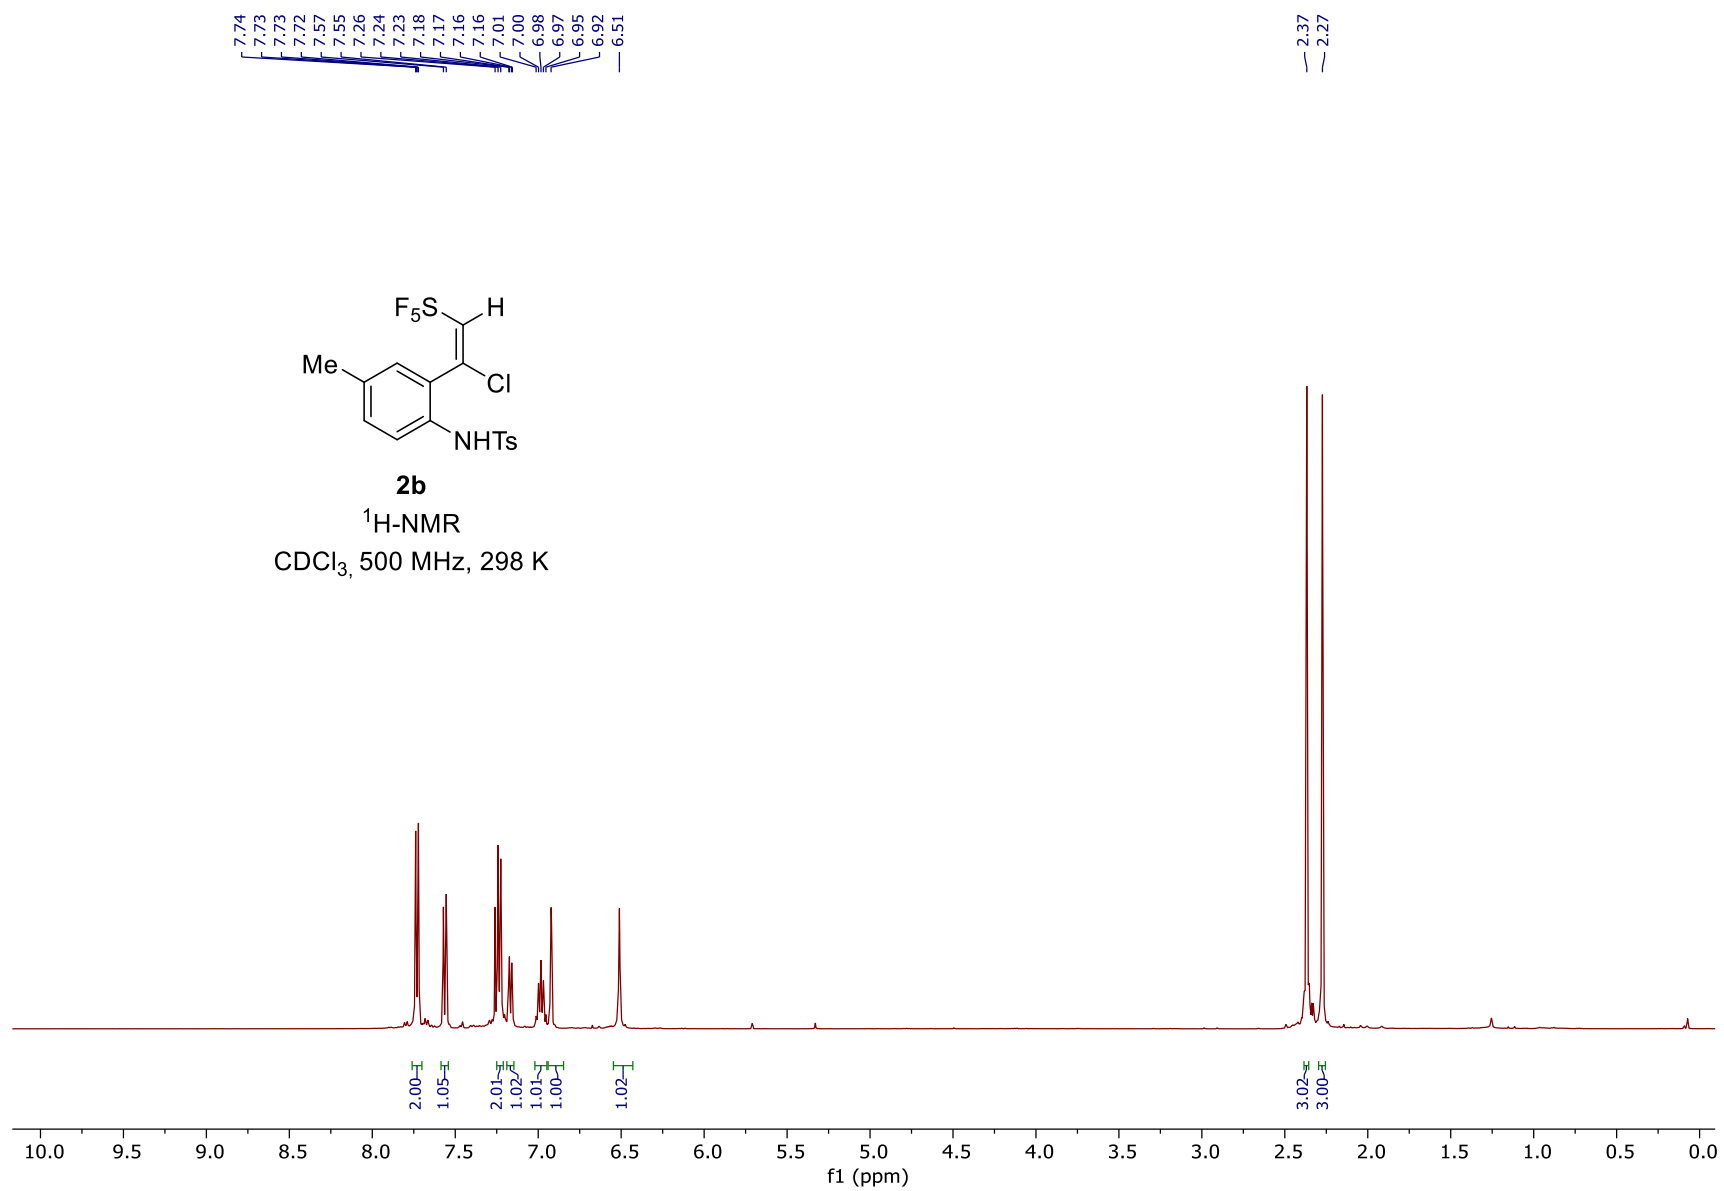

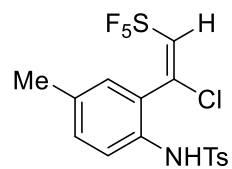**2b**

$^{13}\text{C}$ -NMR  
 $\text{CDCl}_3$ , 125 MHz, 298 K

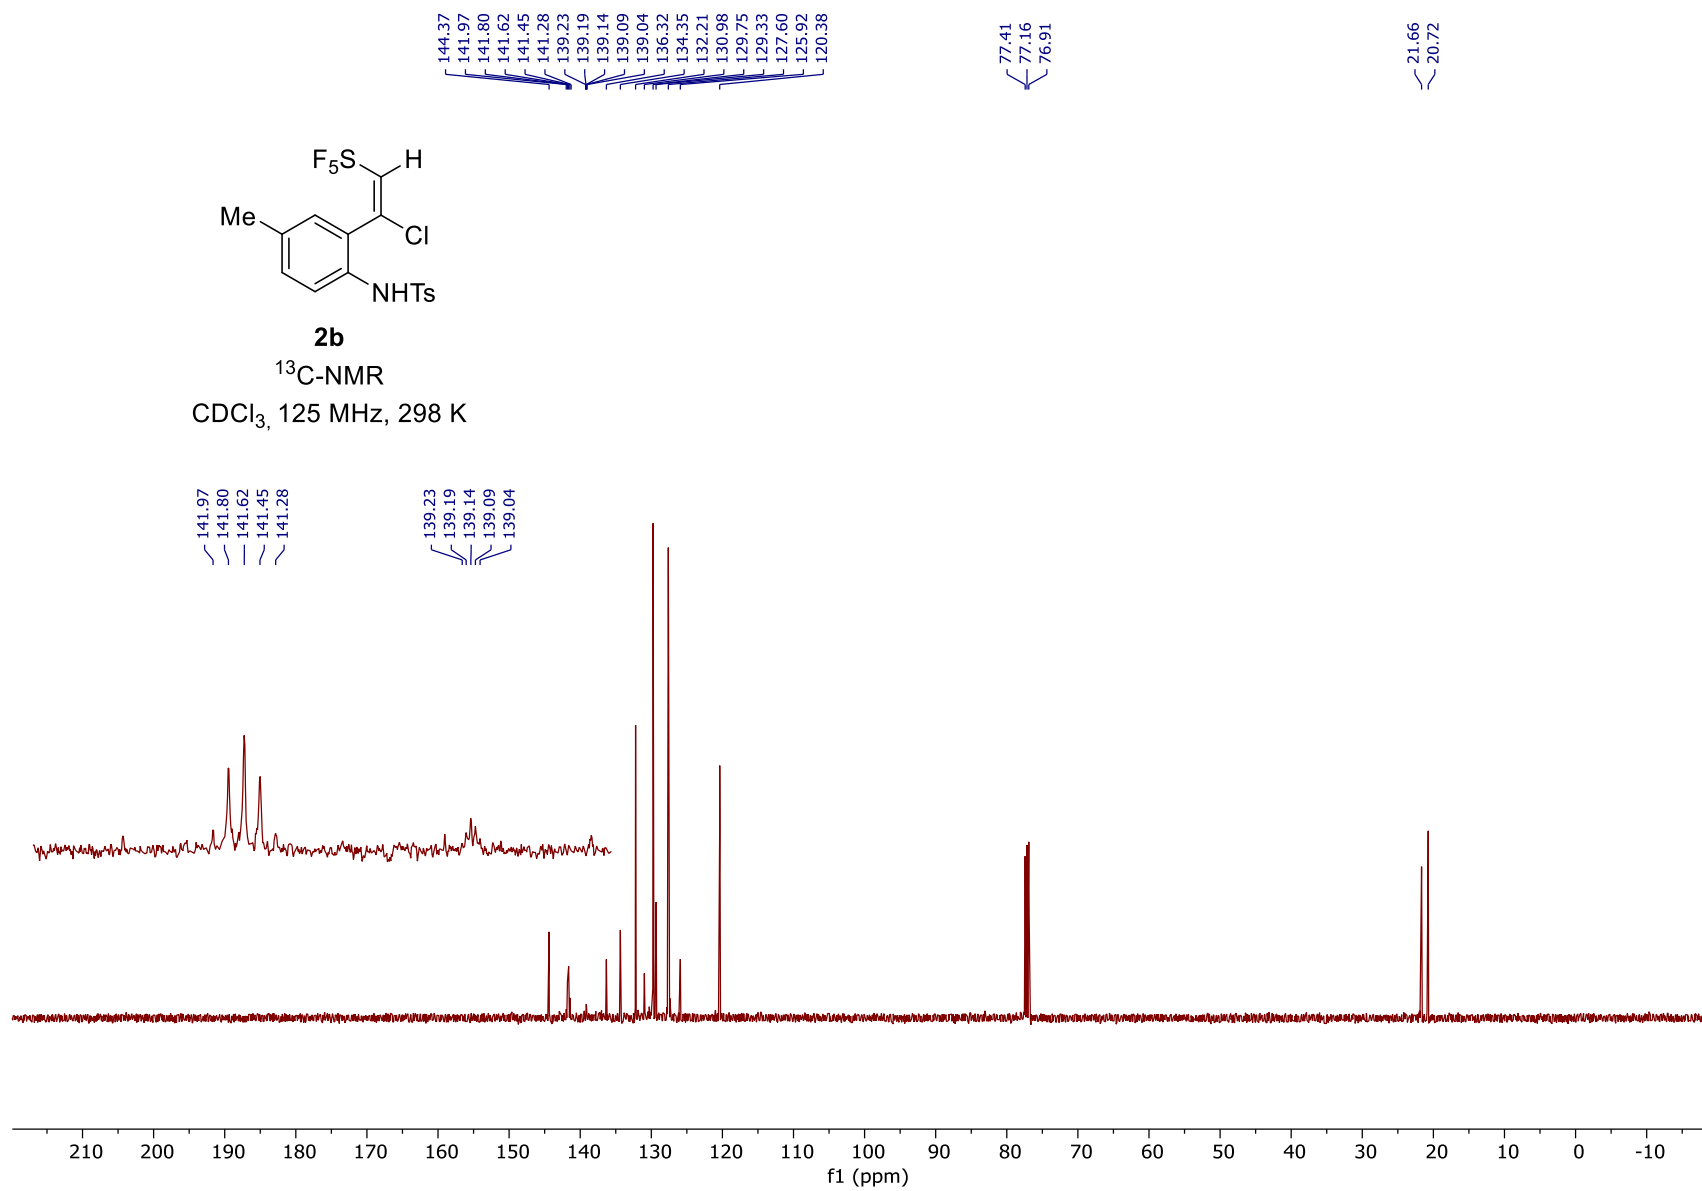

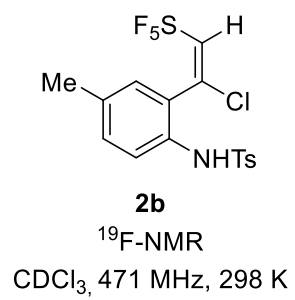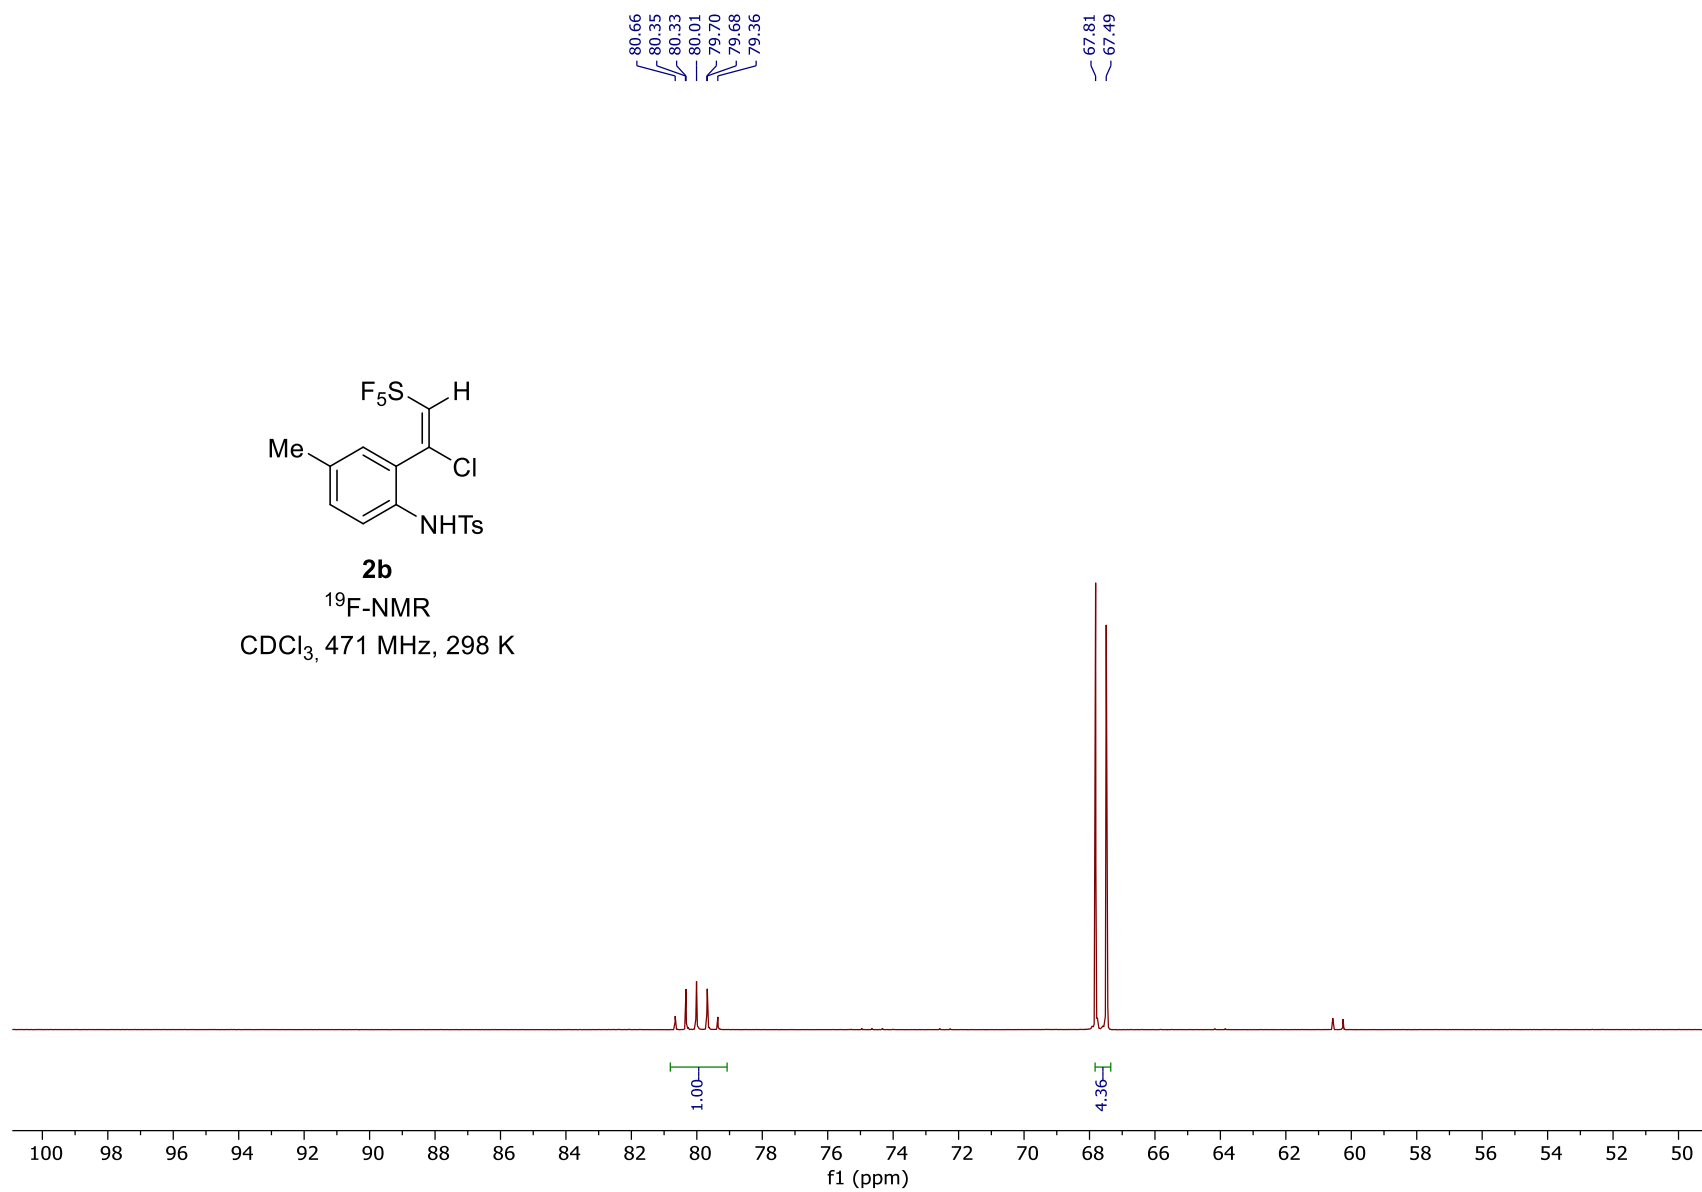

7.70  
7.68  
7.58  
7.56  
7.24  
7.22  
6.99  
6.97  
6.96  
6.94  
6.93  
6.92  
6.91  
6.90  
6.65  
6.65  
6.38

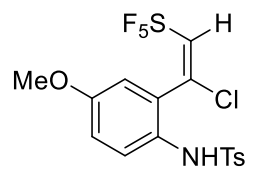

**2c**

<sup>1</sup>H-NMR

CDCl<sub>3</sub>, 500 MHz, 298 K

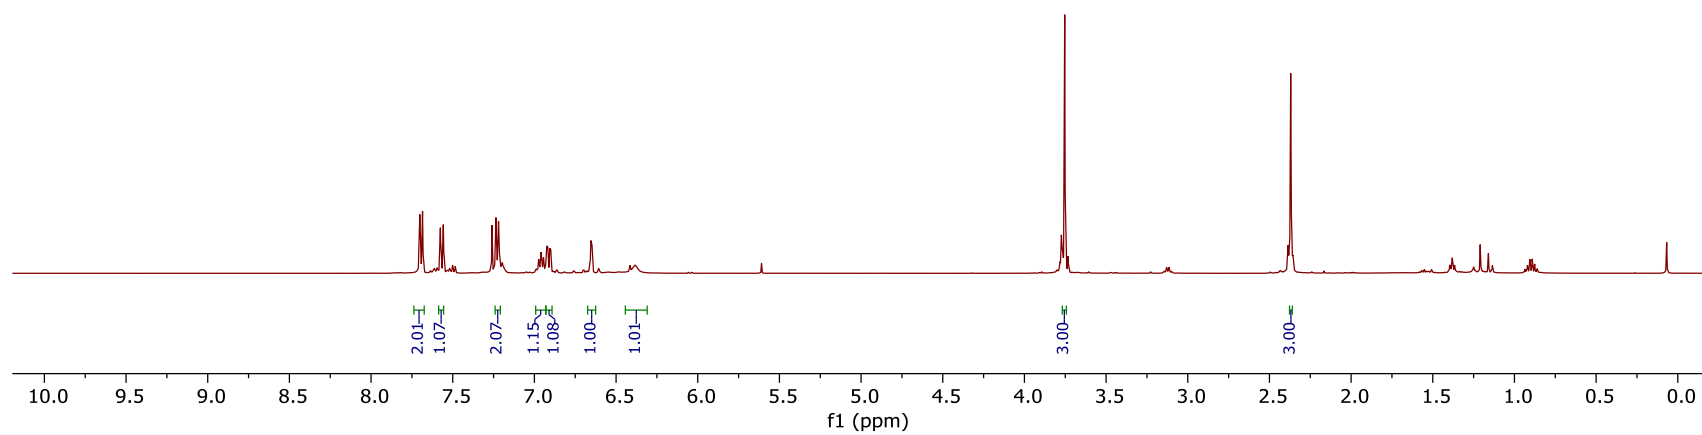

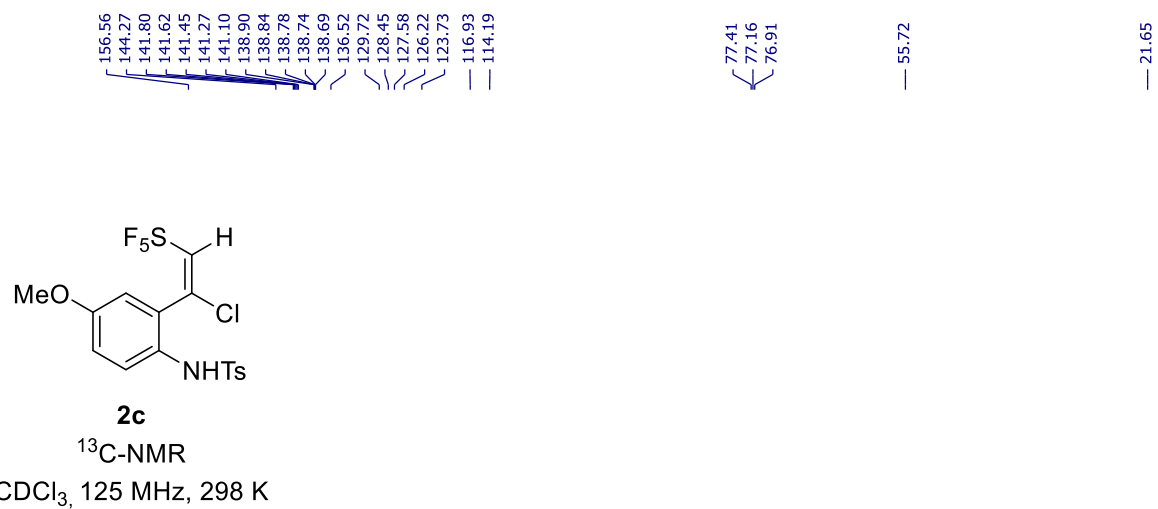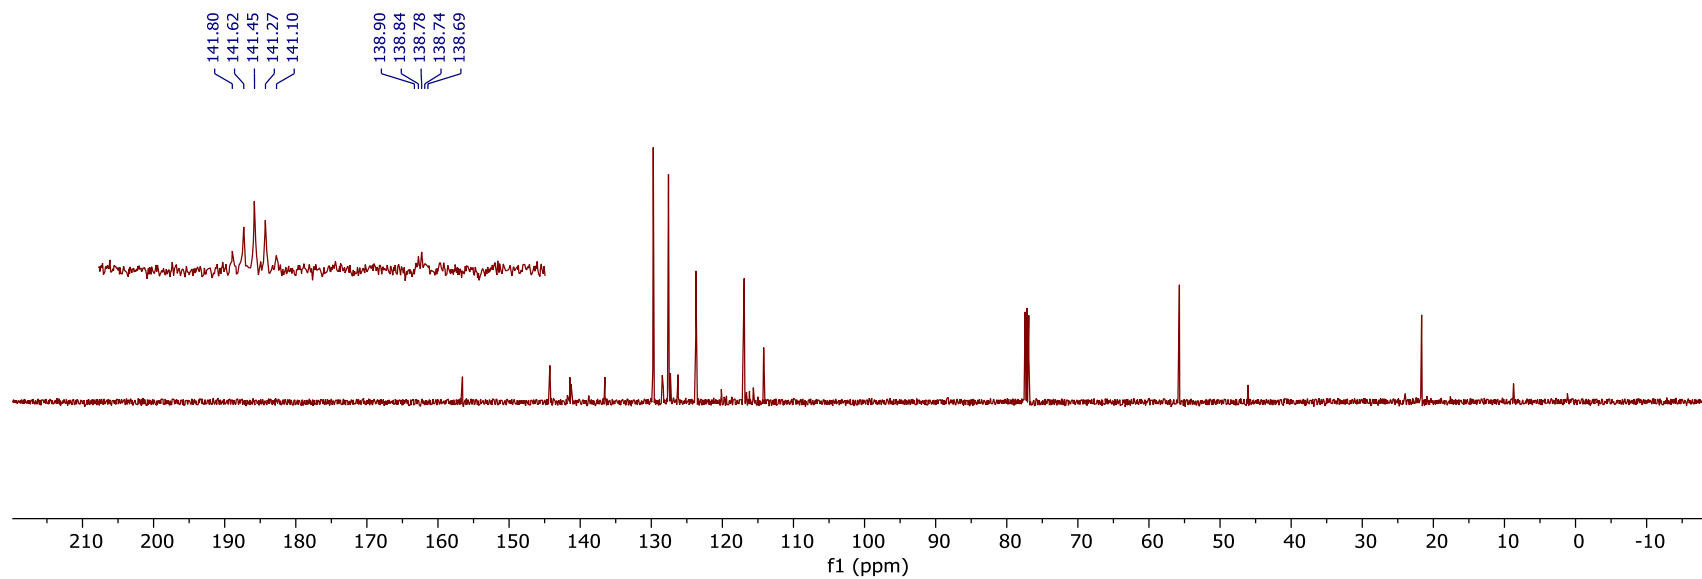

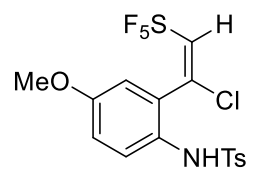**2c**<sup>19</sup>F-NMRCDCl<sub>3</sub>, 471 MHz, 298 K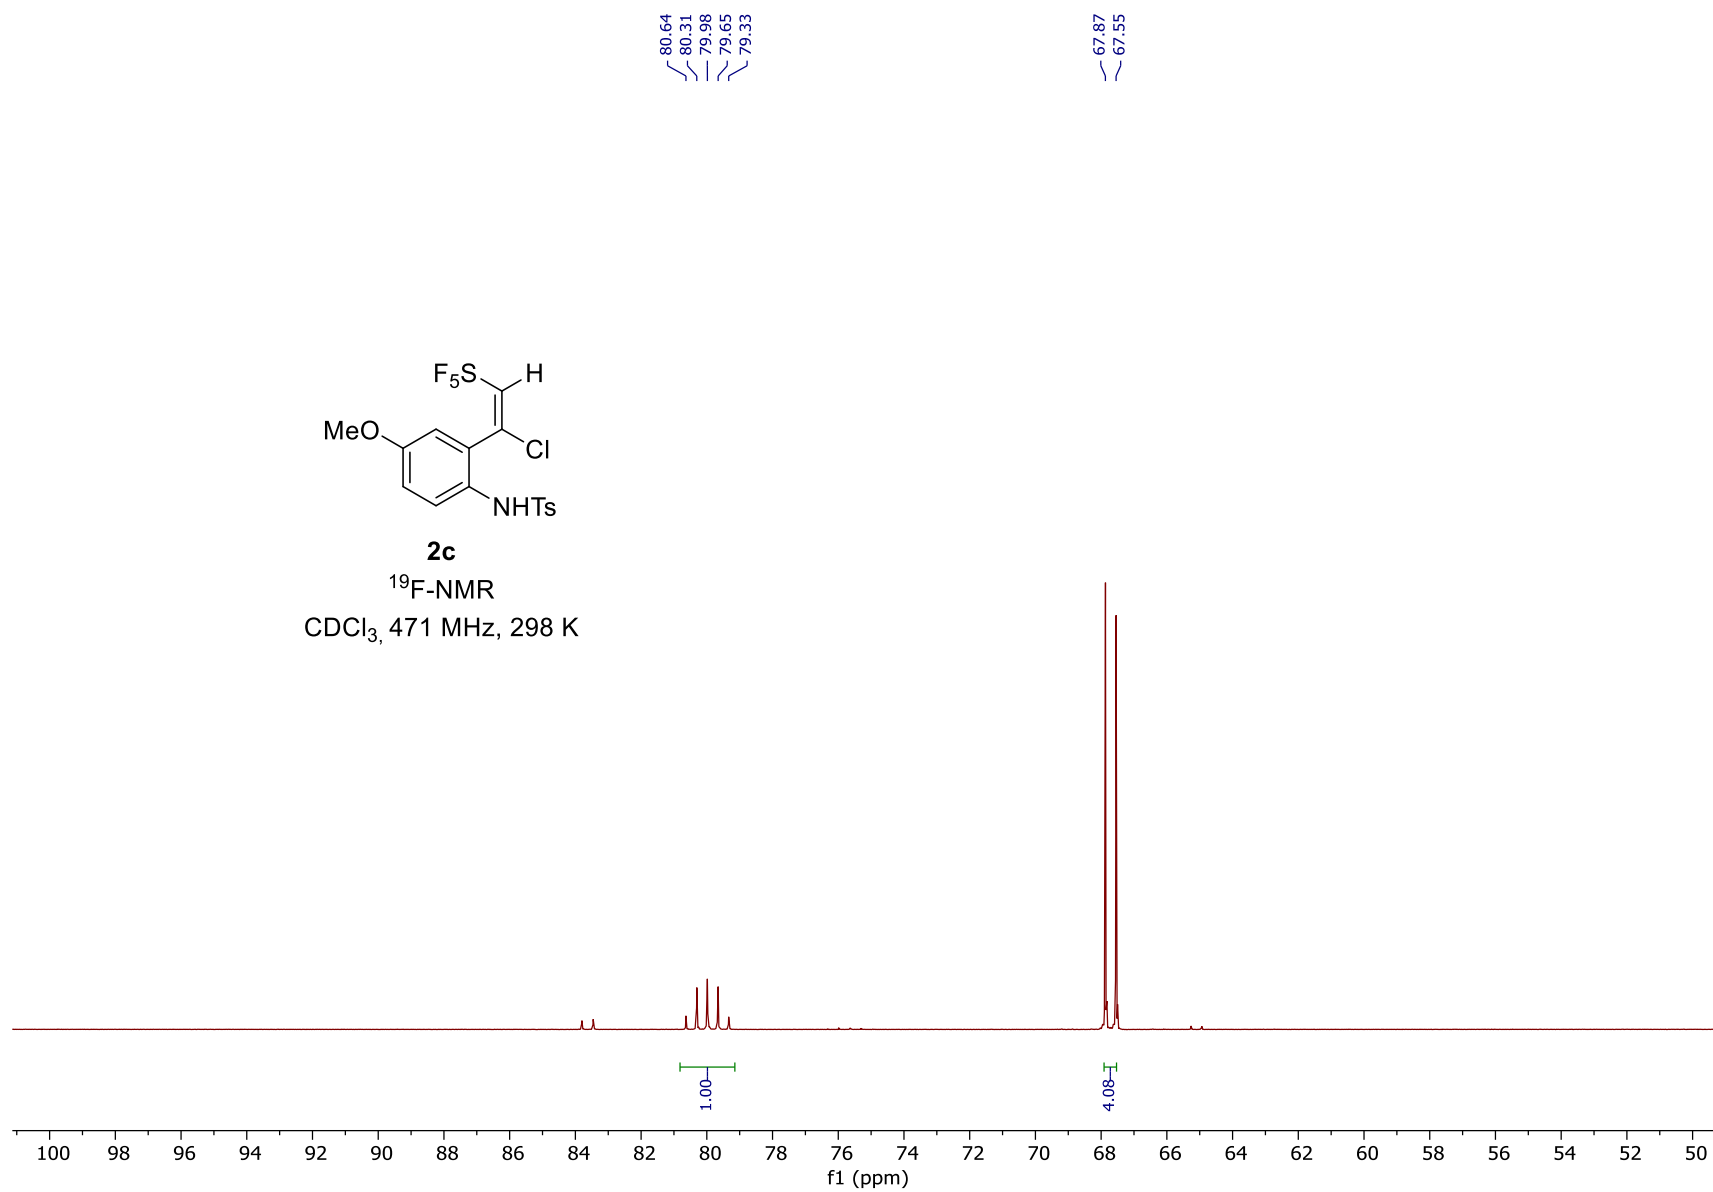

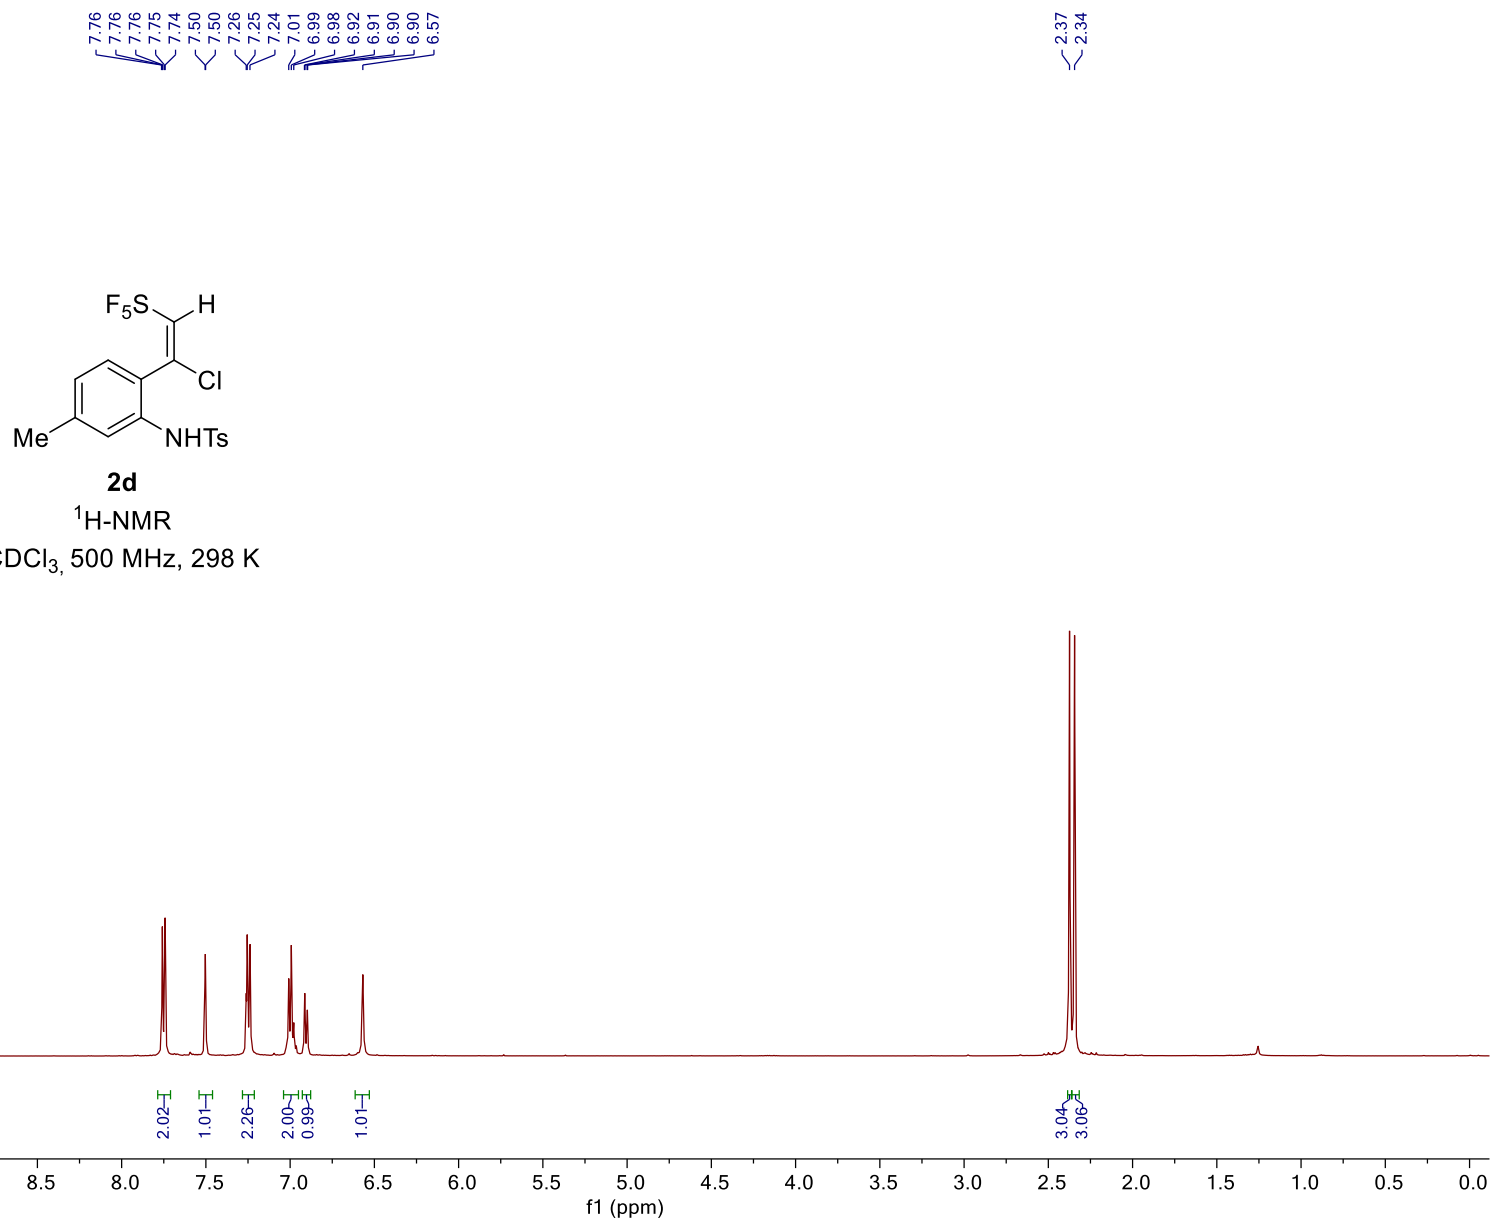

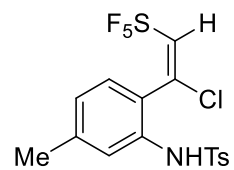**2d**<sup>13</sup>C-NMRCDCl<sub>3</sub>, 125 MHz, 298 K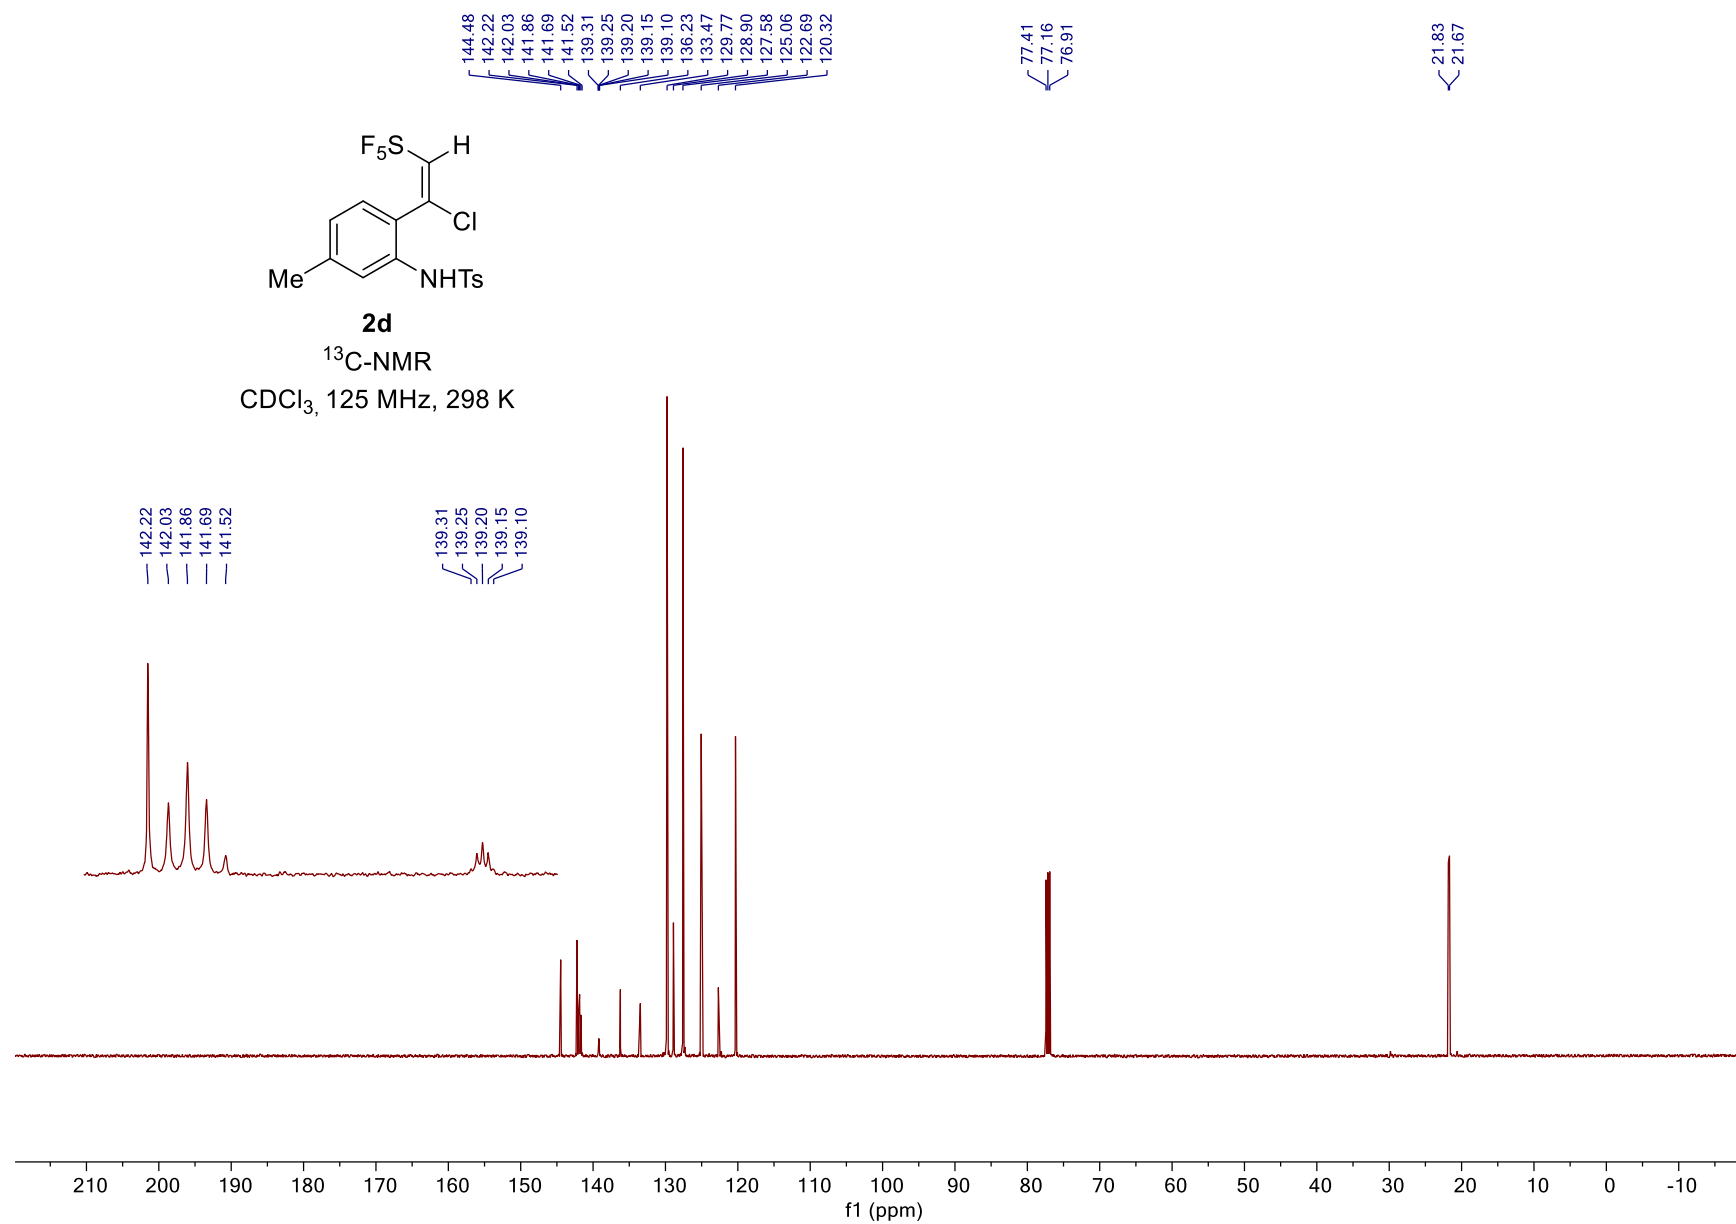



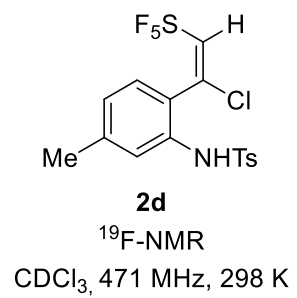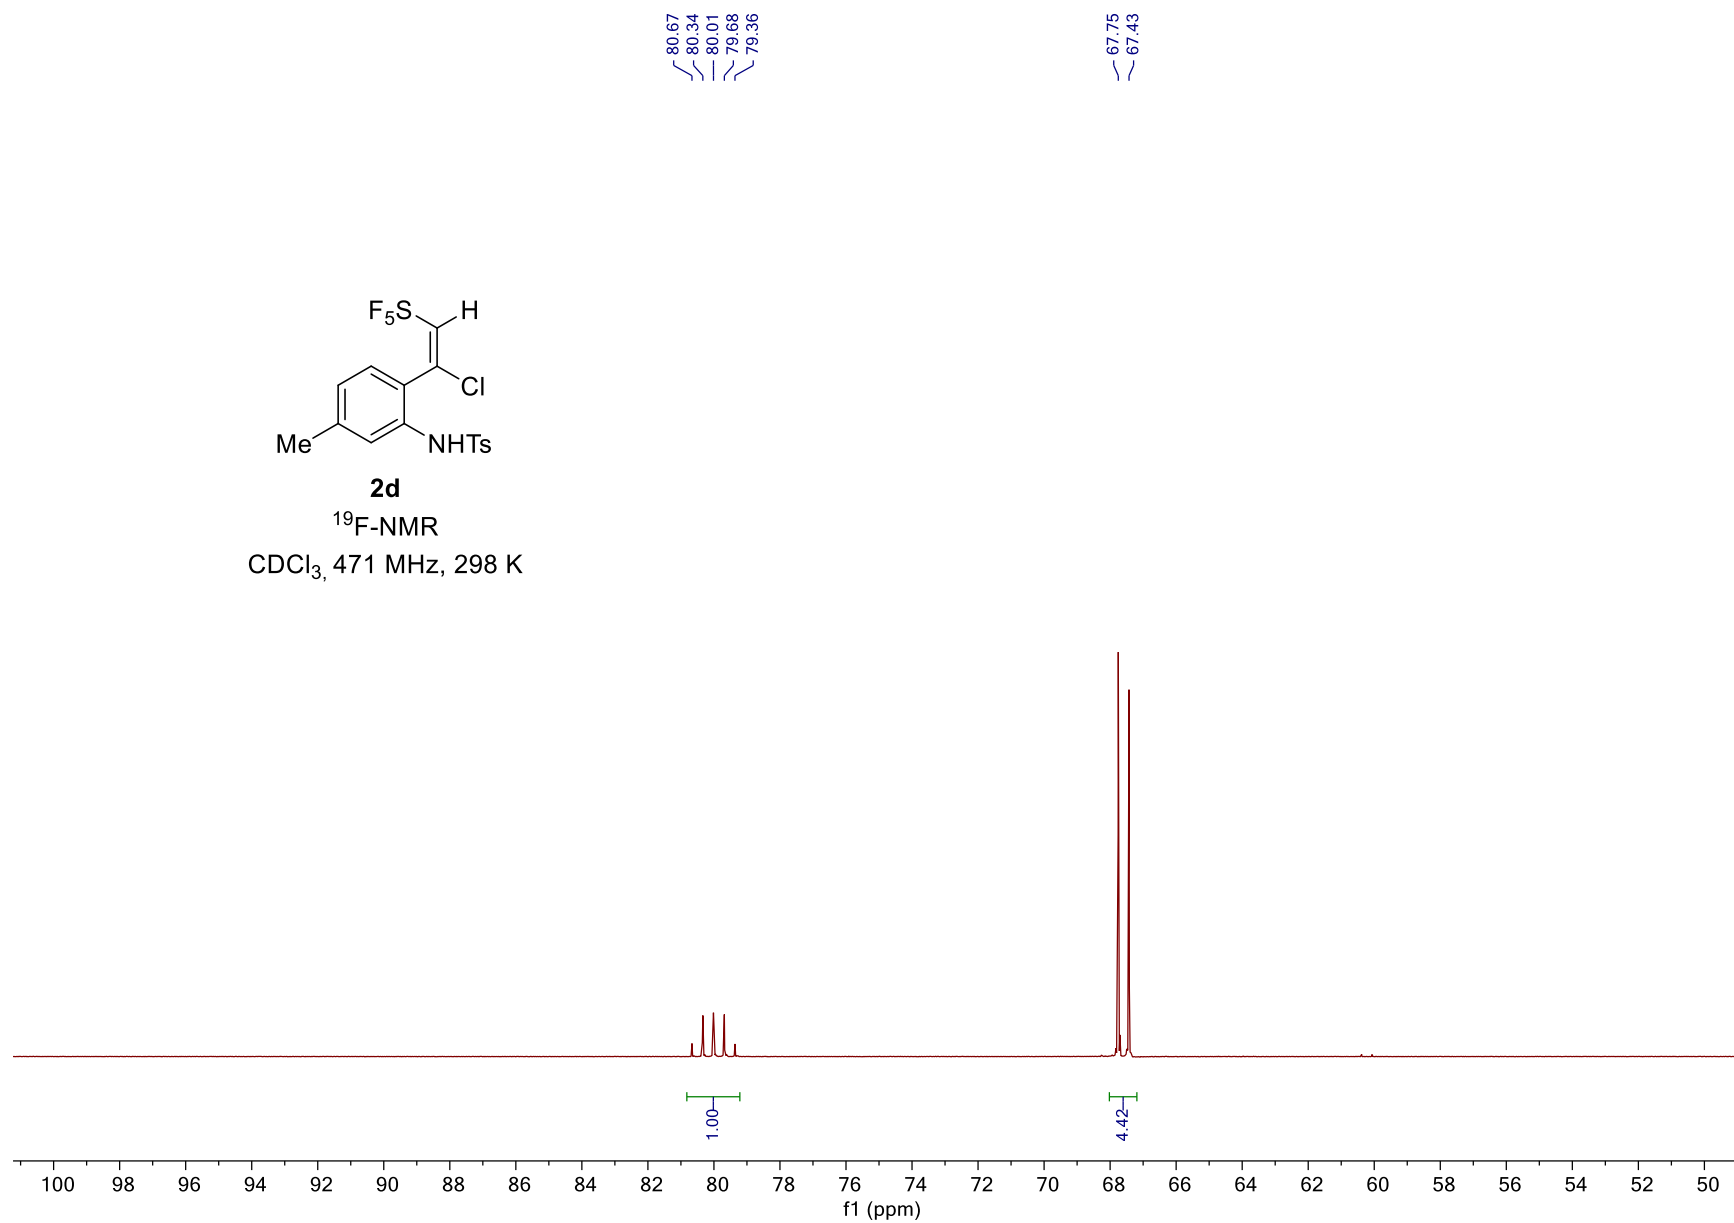

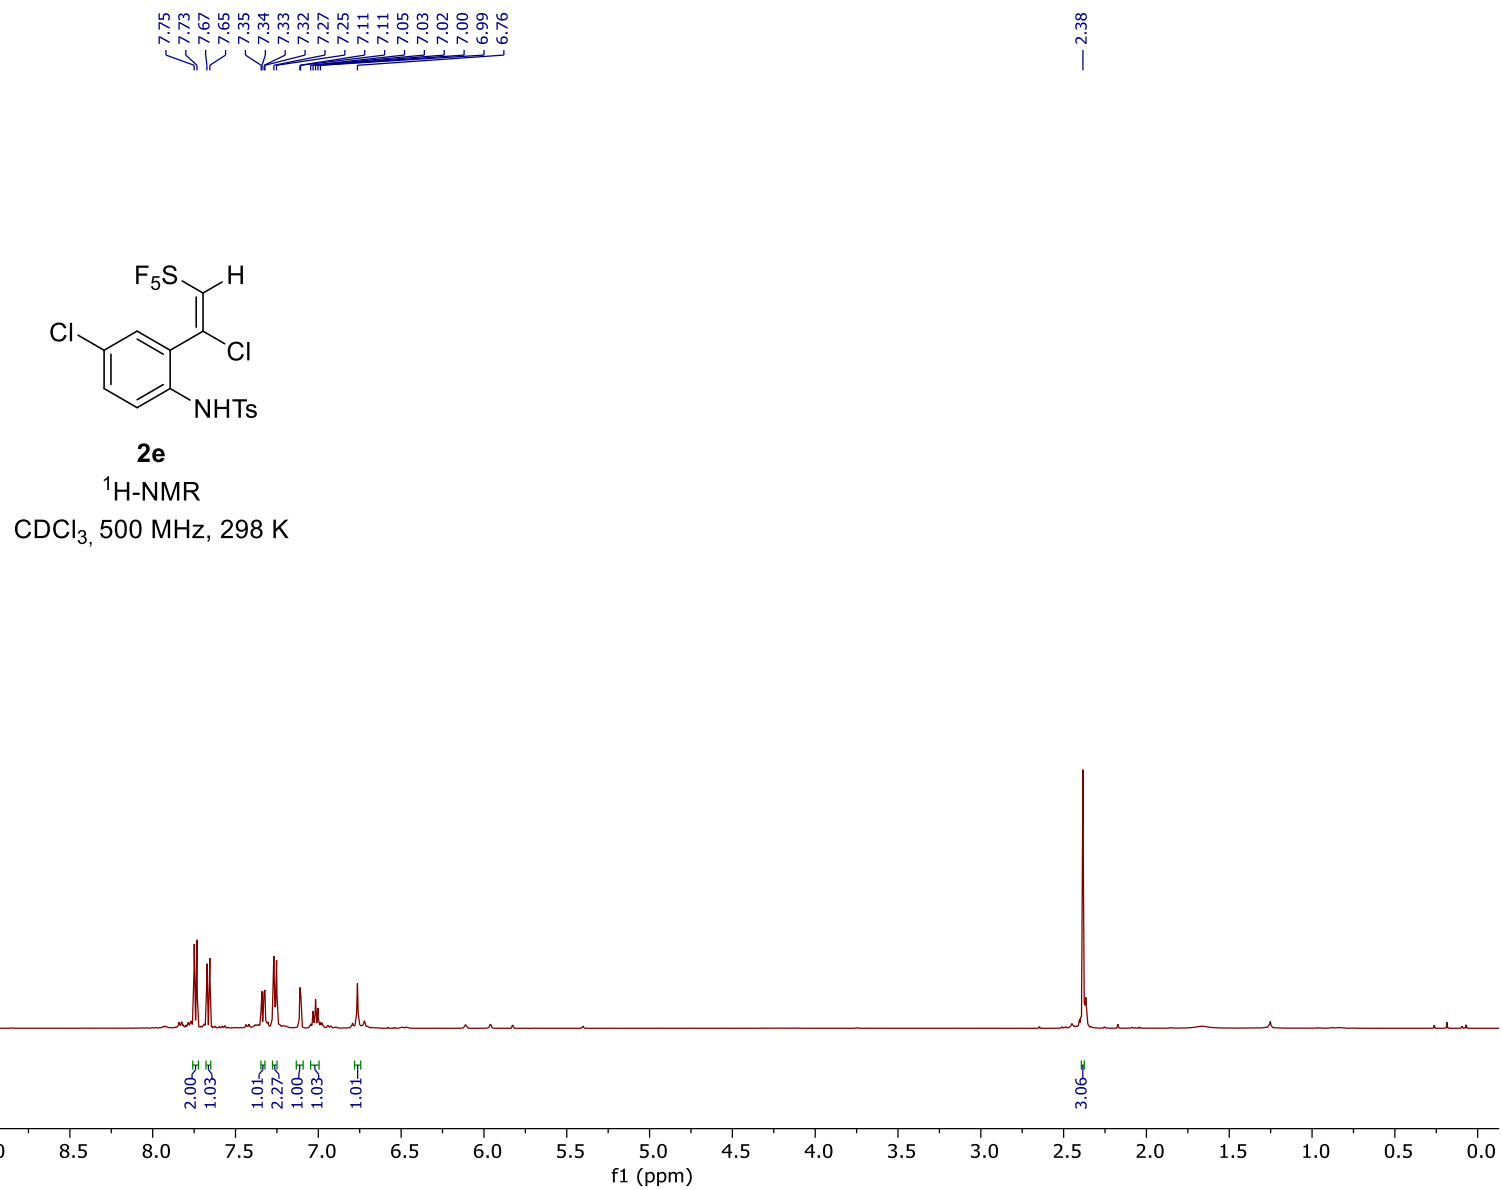

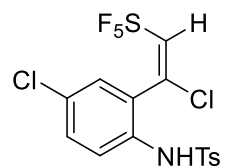**2e**<sup>13</sup>C-NMRCDCl<sub>3</sub>, 125 MHz, 298 K

144.85  
142.94  
142.76  
142.59  
142.41  
142.24  
137.23  
137.19  
137.14  
137.08  
137.03  
135.83  
132.38  
131.53  
129.92  
129.63  
128.83  
127.60  
126.85  
121.19

77.42  
77.16  
76.91

21.70

142.94  
142.76  
142.59  
142.41  
142.24

137.23  
137.19  
137.14  
137.08  
137.03

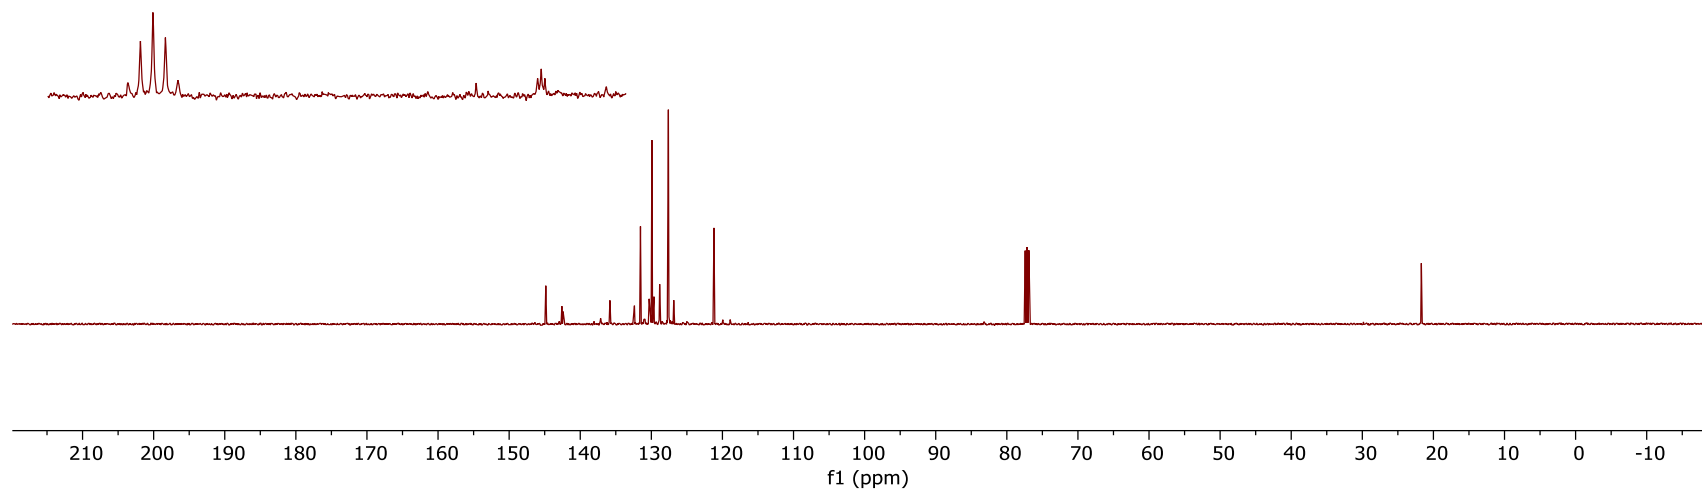

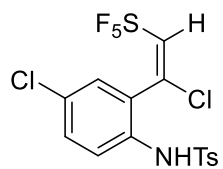**2e**<sup>19</sup>F-NMRCDCl<sub>3</sub>, 471 MHz, 298 K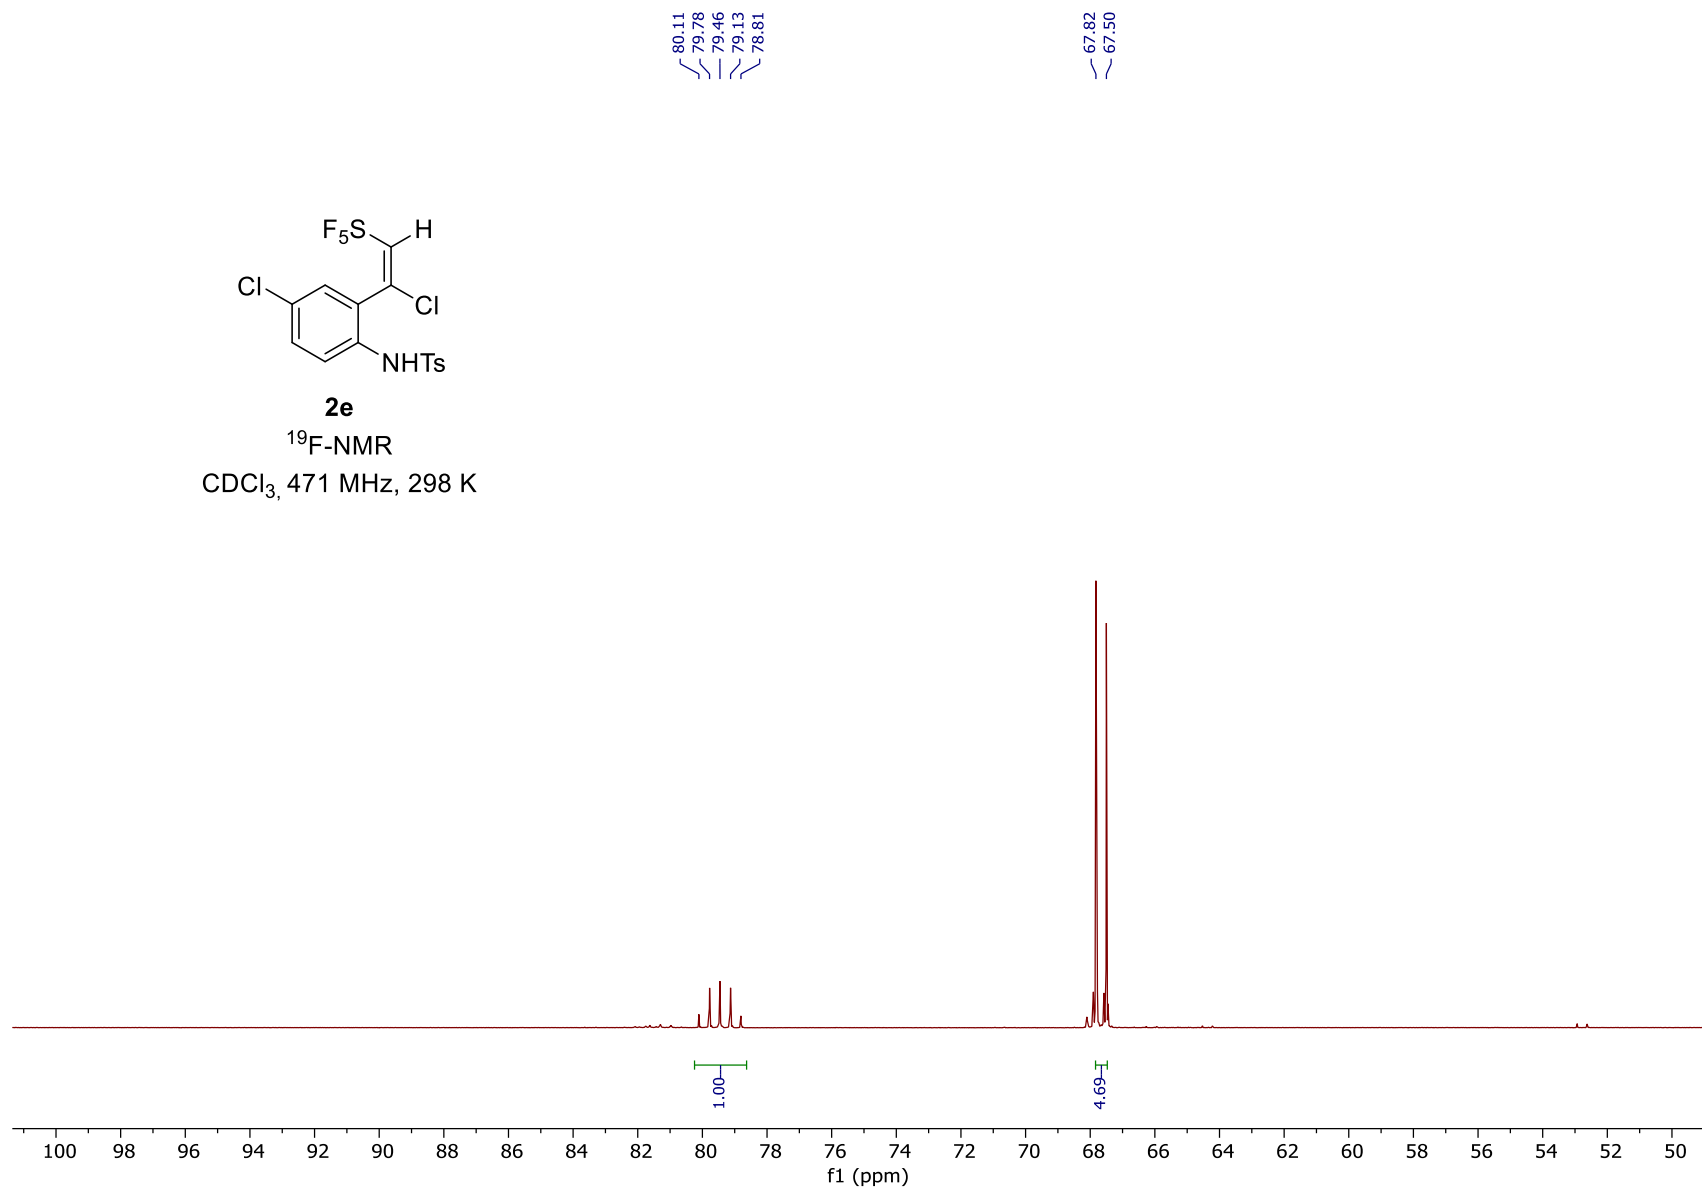

8.03  
8.03  
8.01  
8.00  
7.82  
7.79  
7.77  
7.75  
7.73  
7.27  
7.26  
7.25  
7.11  
7.09  
7.08  
7.06  
7.04  
6.96

3.87

2.38

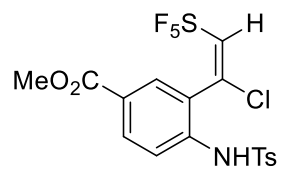

**2f**

<sup>1</sup>H-NMR

CDCl<sub>3</sub>, 500 MHz, 298 K

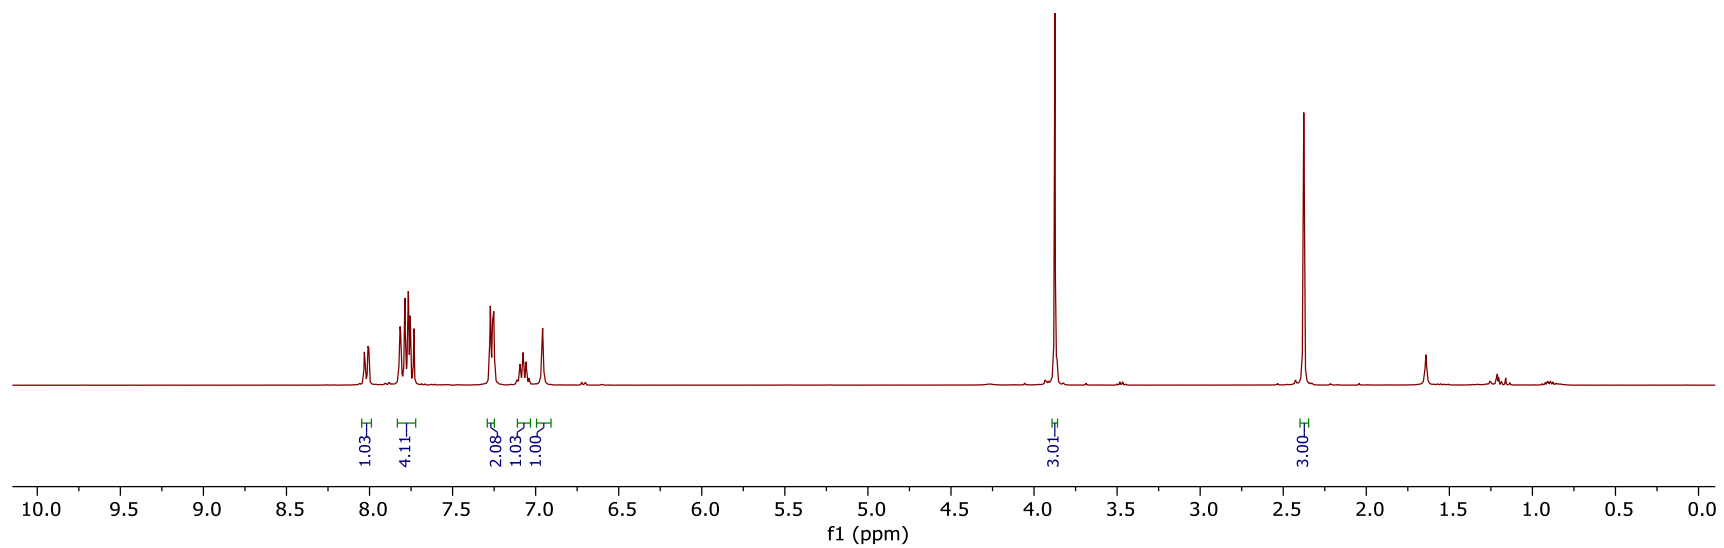

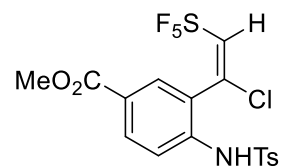**2f**<sup>13</sup>C-NMRCDCl<sub>3</sub>, 125 MHz, 298 K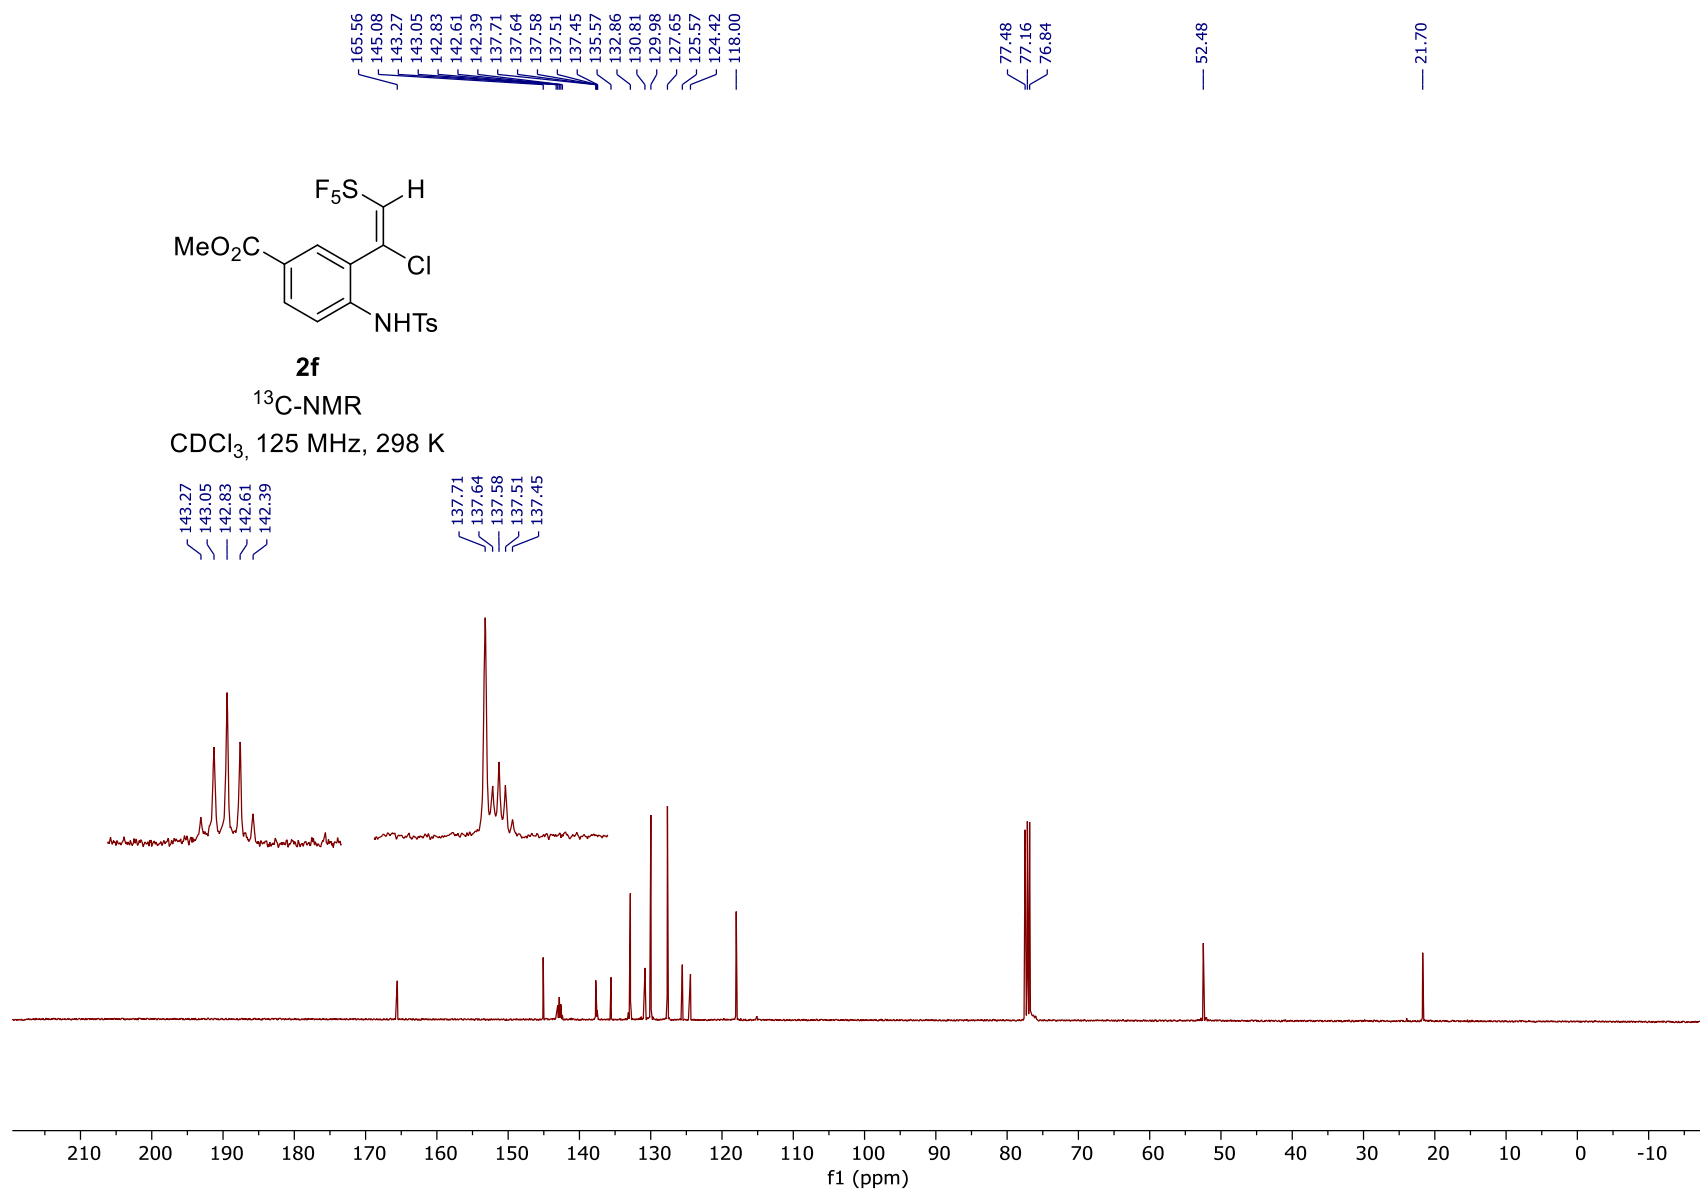

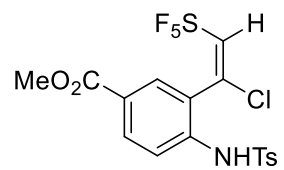**2f**<sup>19</sup>F-NMRCDCl<sub>3</sub>, 471 MHz, 298 K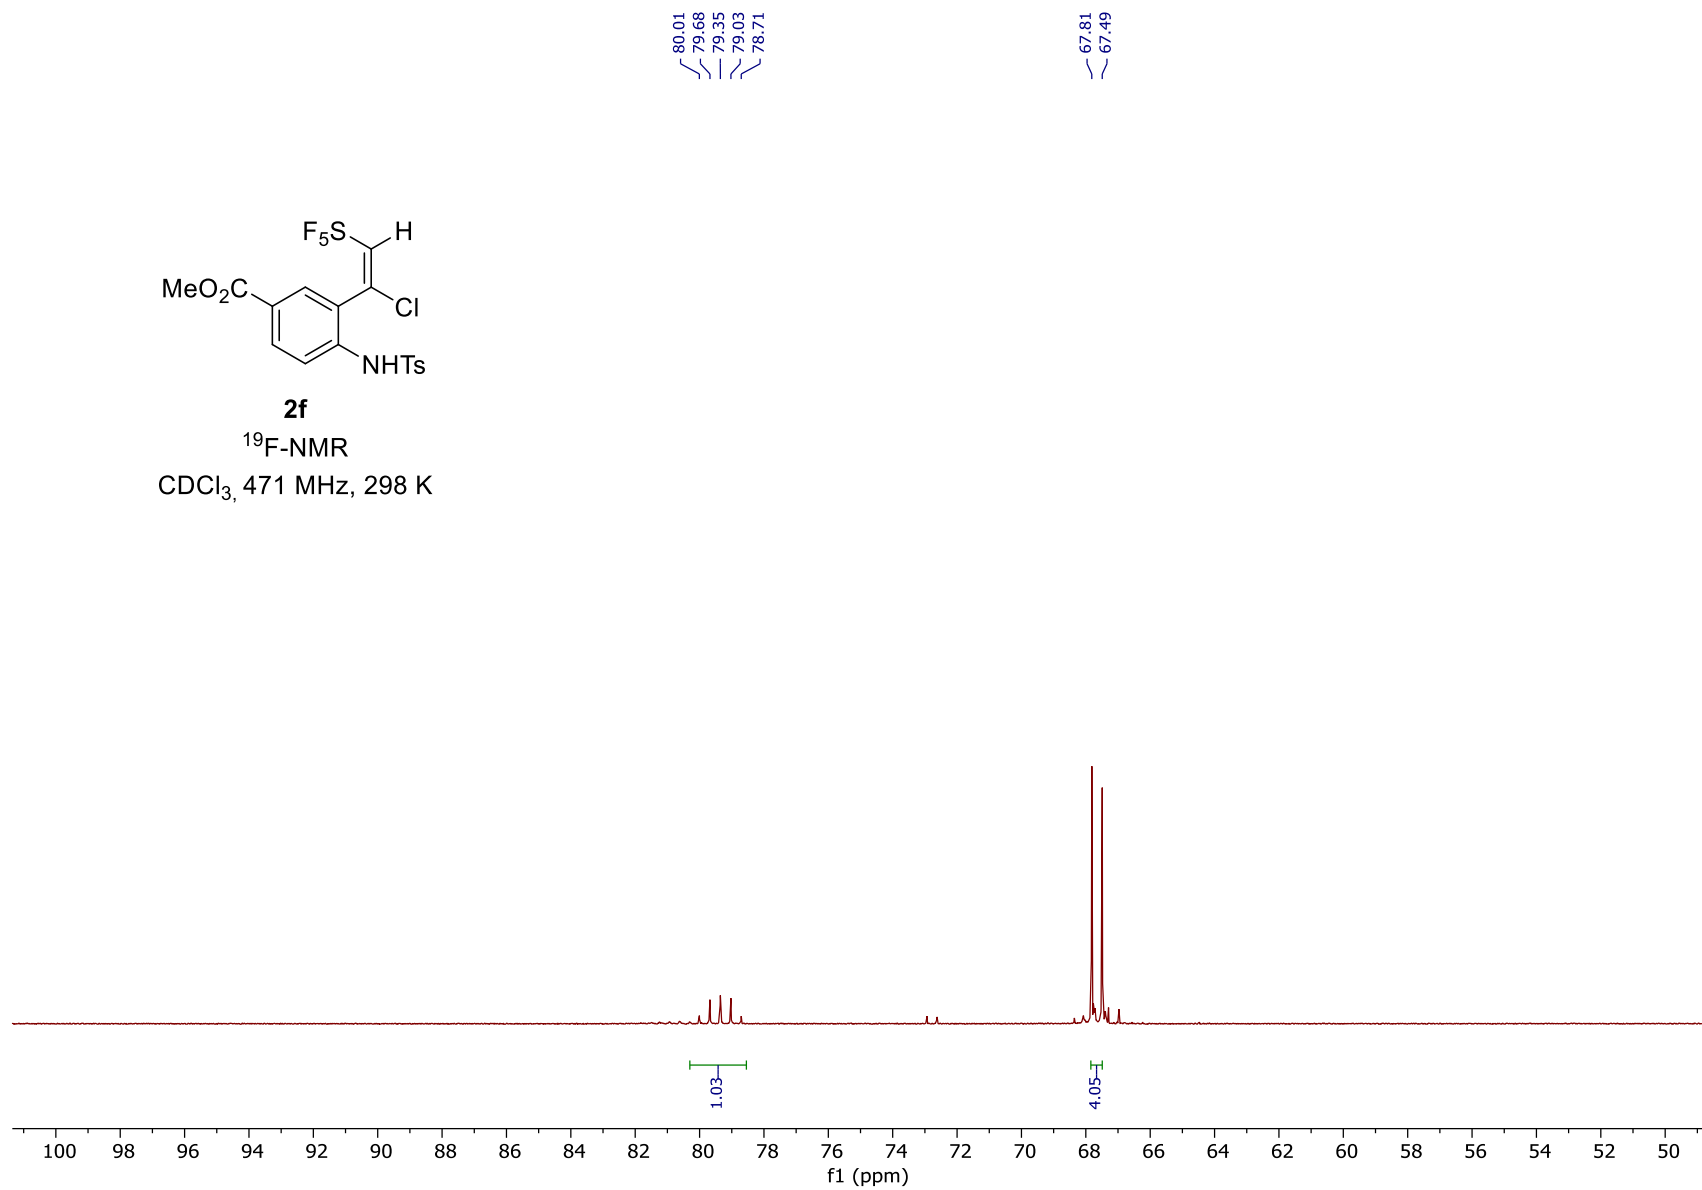

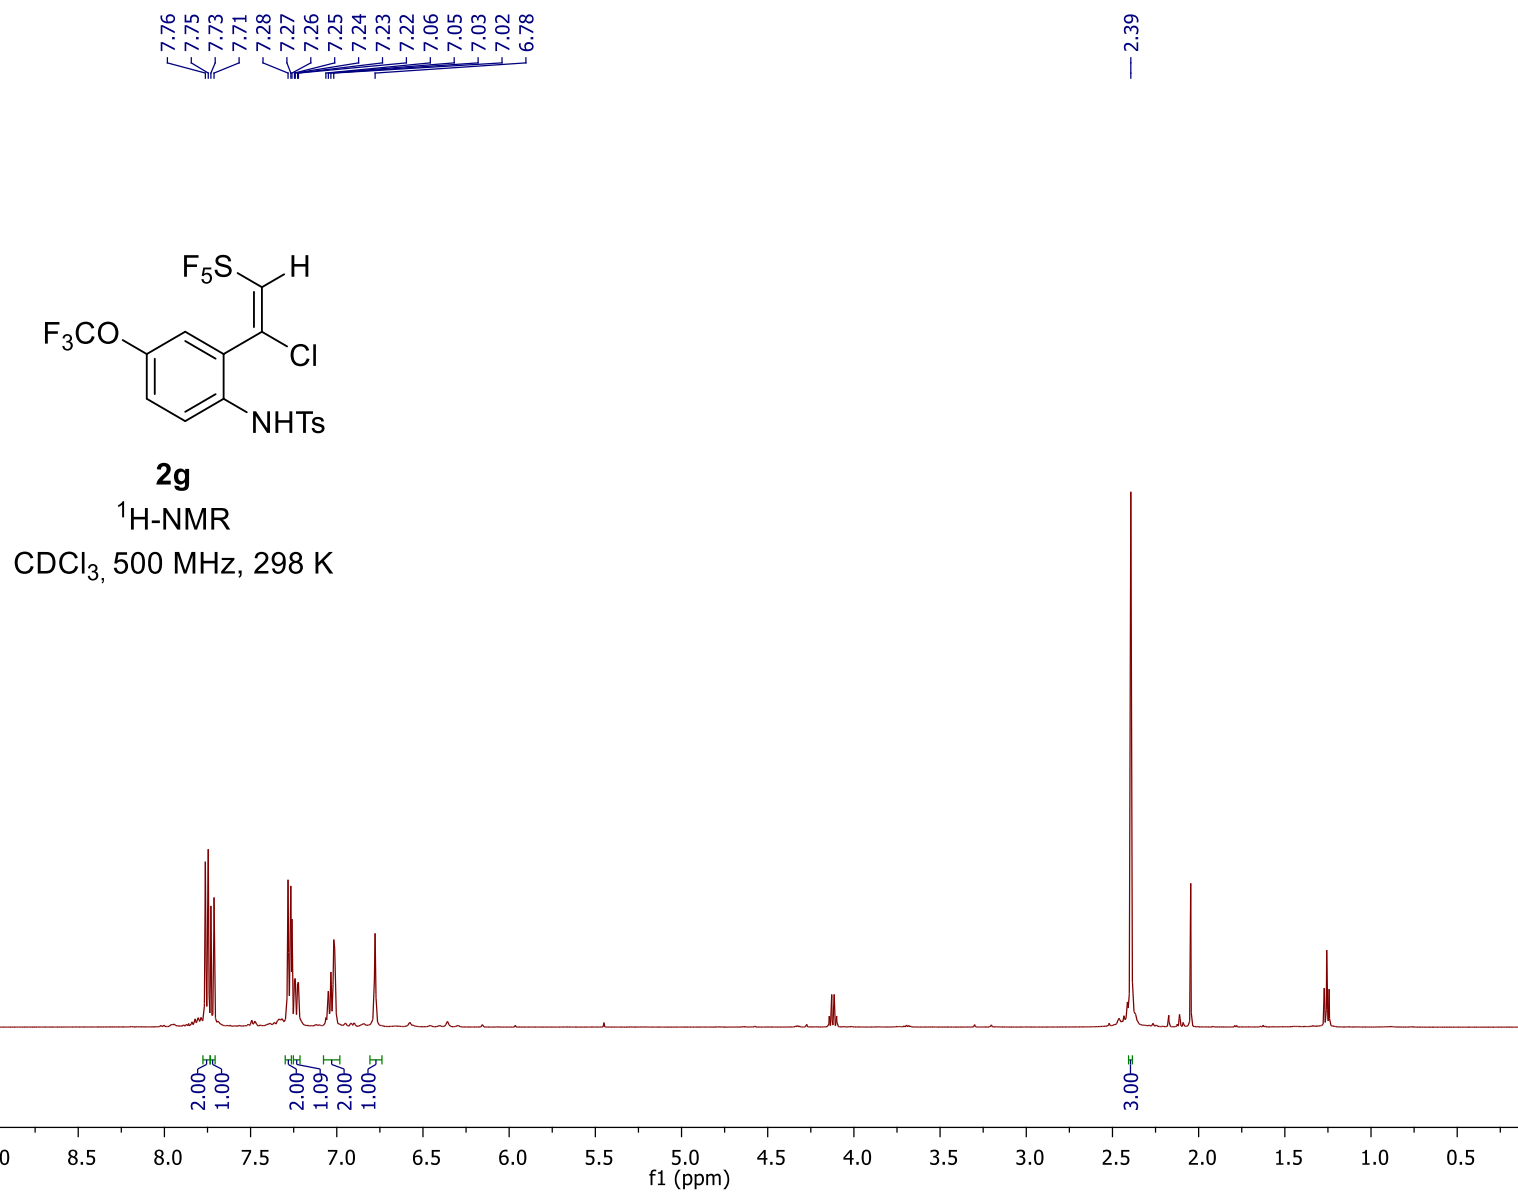



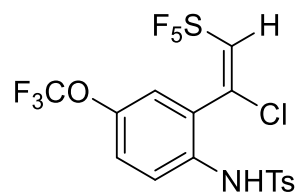**2g** $^{13}\text{C}$ -NMR $\text{CDCl}_3$ , 125 MHz, 298 K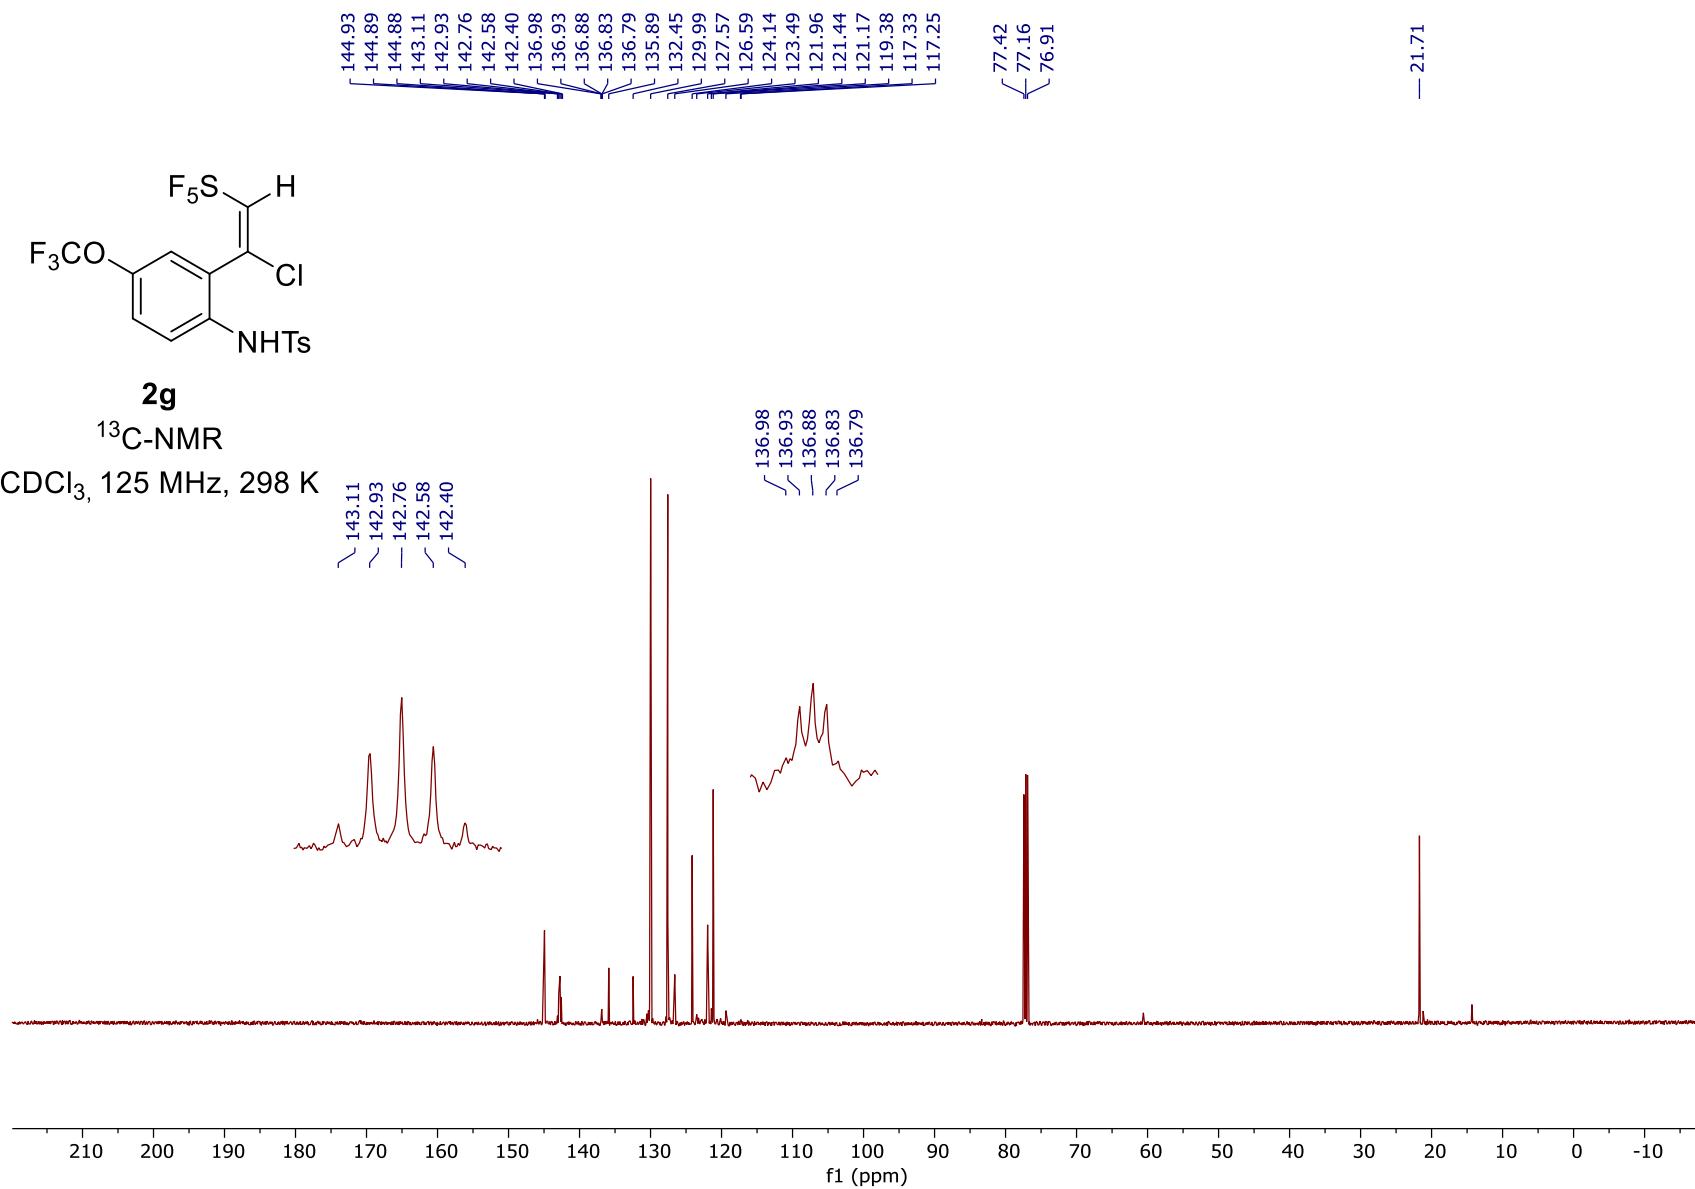

79.94  
79.61  
79.29  
78.96  
78.64  
67.73  
67.40

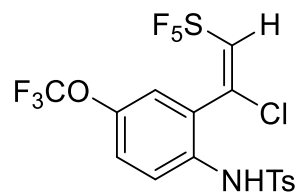

**2g**

$^{19}F$ -NMR

$CDCl_3$ , 471 MHz, 298 K

79.94  
79.61  
79.29  
78.96  
78.64

67.73  
67.40

-58.38

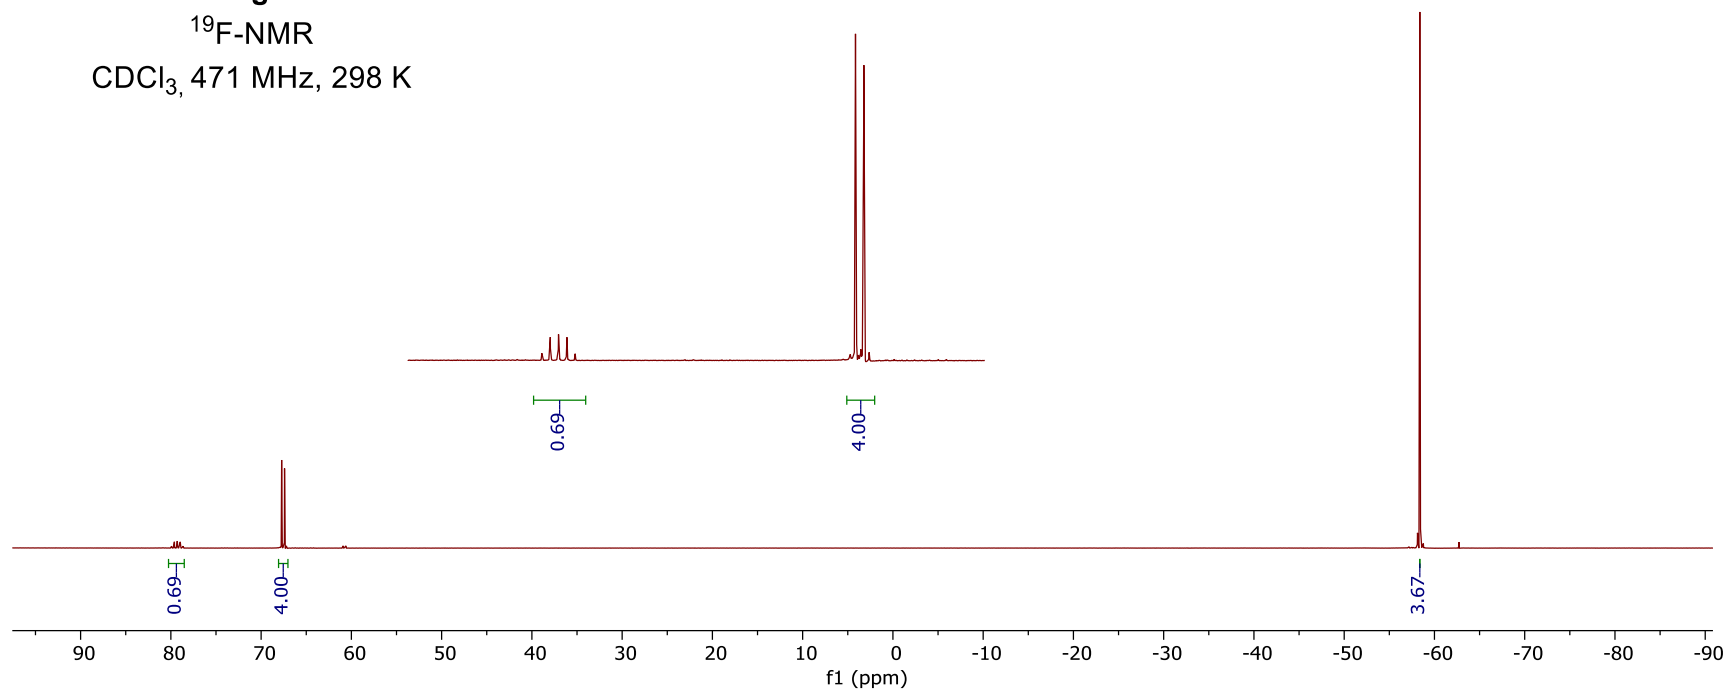

7.80  
7.79  
7.78  
7.77  
7.63  
7.62  
7.61  
7.42  
7.30  
7.29  
7.26  
7.12  
7.11  
7.09  
7.08  
7.06

— 2.40

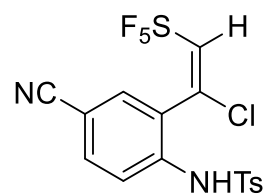

**2h**

<sup>13</sup>C-NMR

CDCl<sub>3</sub>, 500 MHz, 298 K

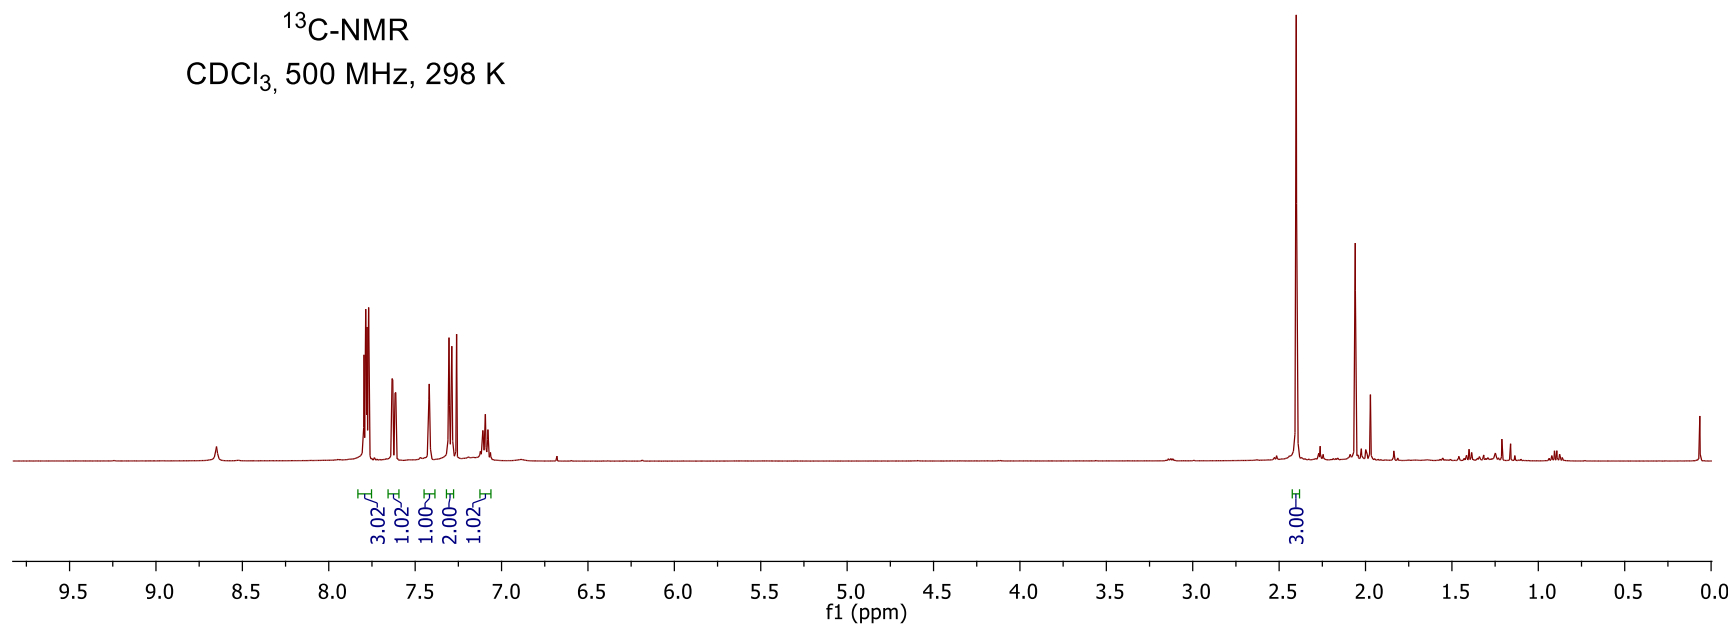

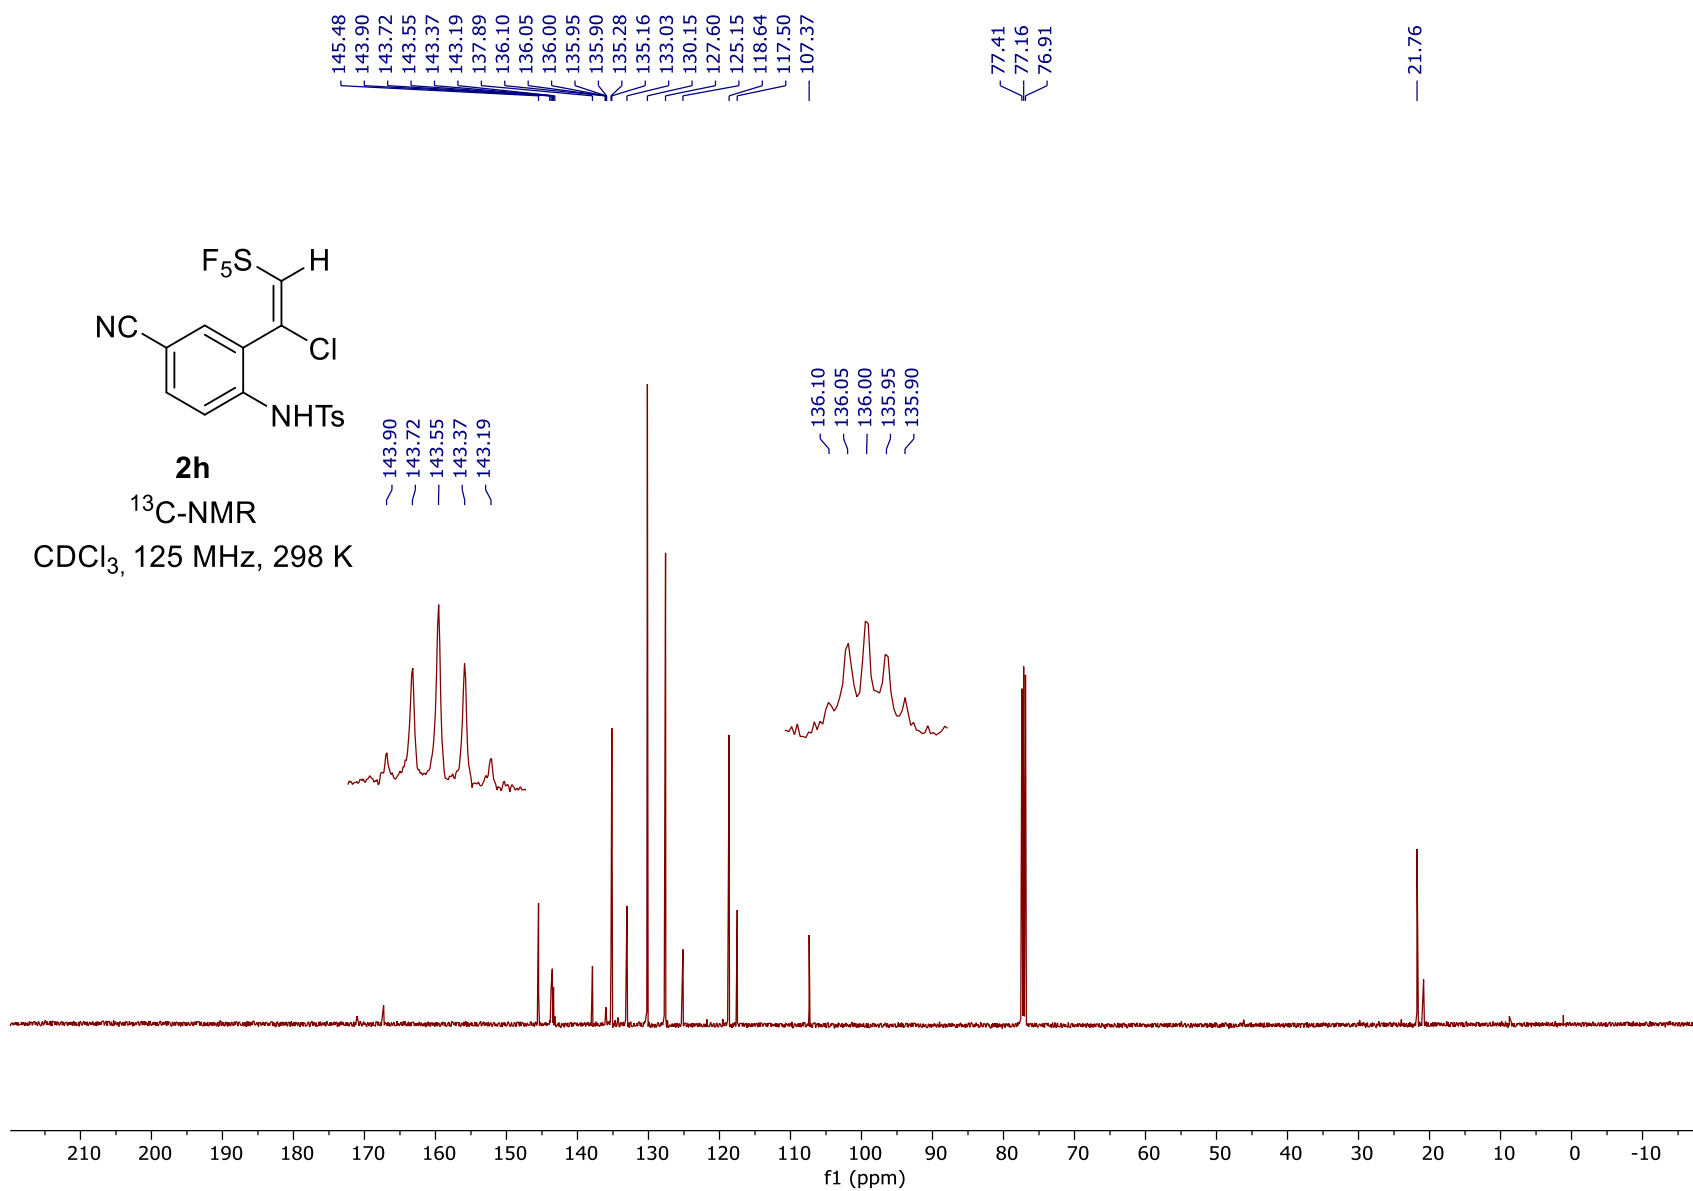

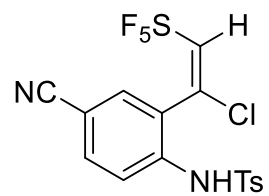**2h**<sup>19</sup>F-NMRCDCl<sub>3</sub>, 471 MHz, 298 K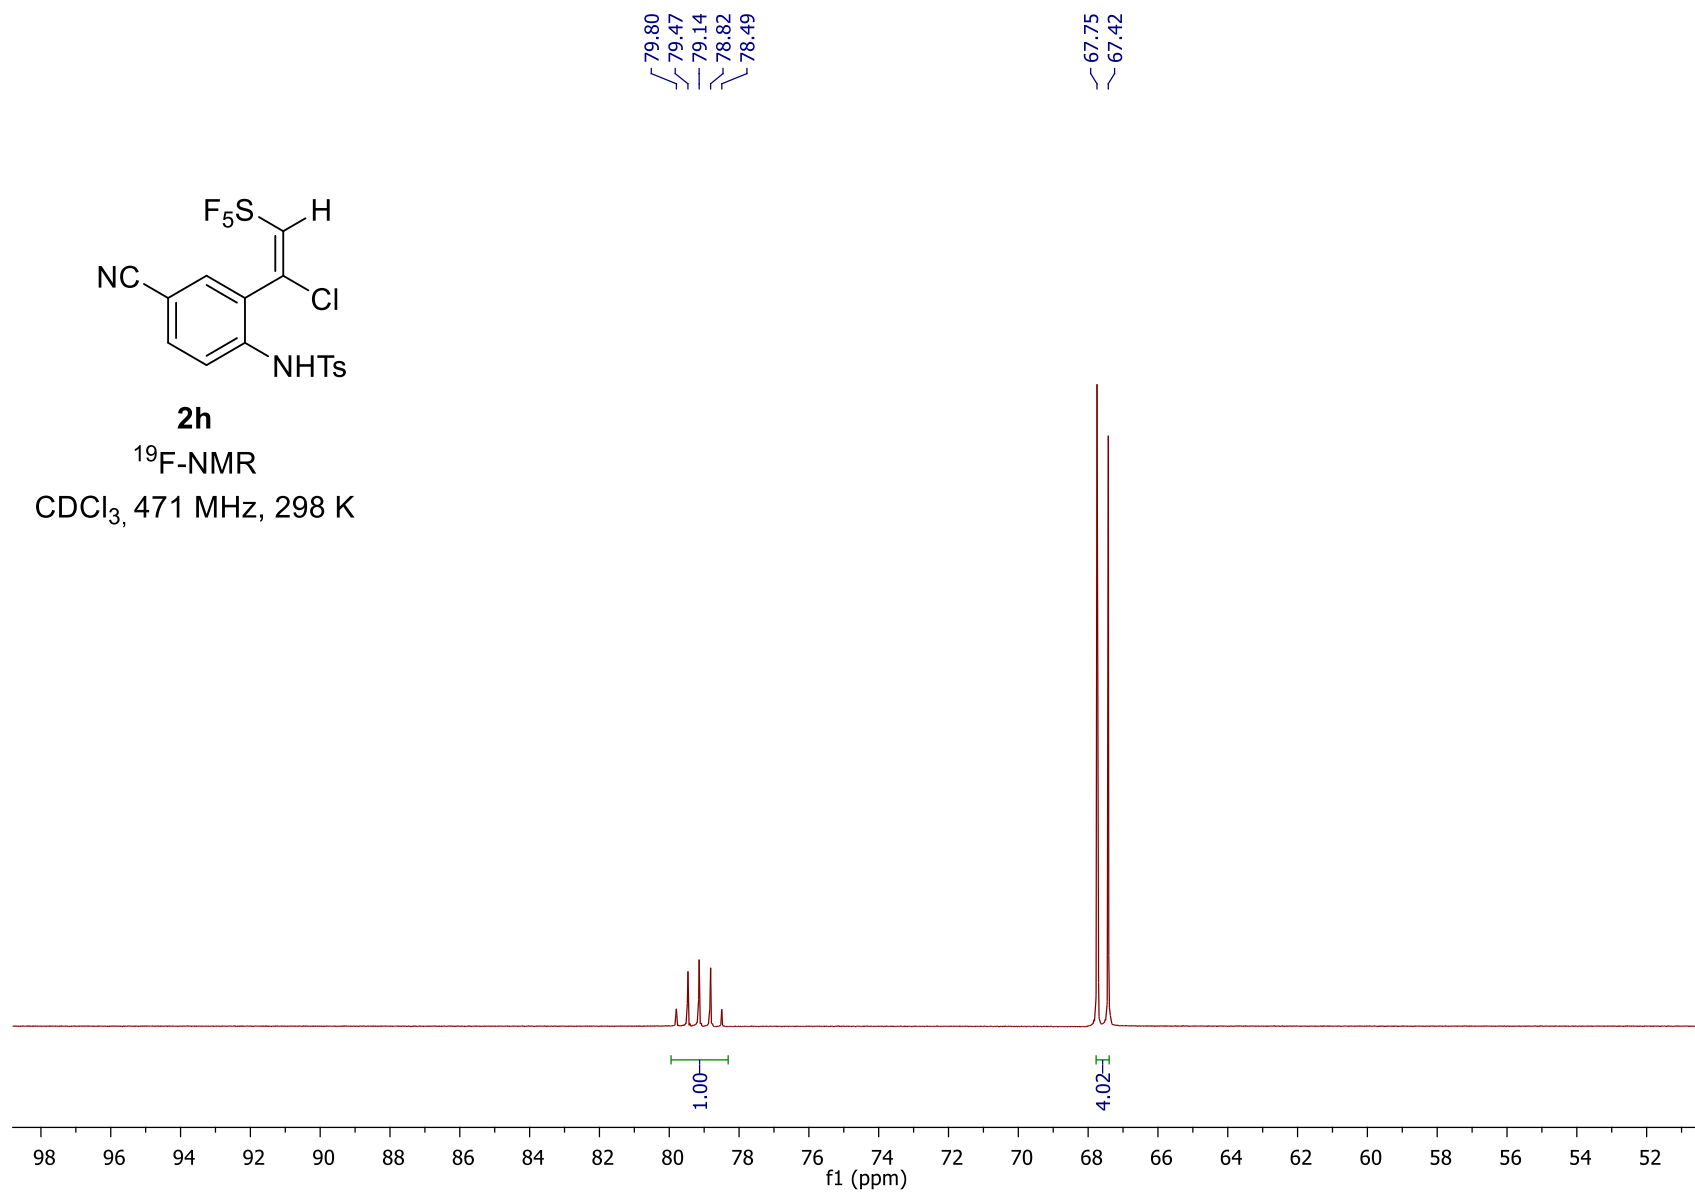

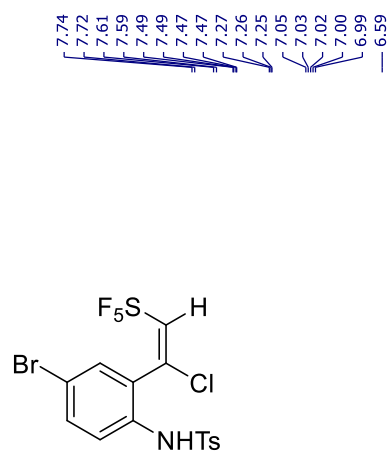**2i**<sup>1</sup>H-NMRCDCl<sub>3</sub>, 500 MHz, 298 K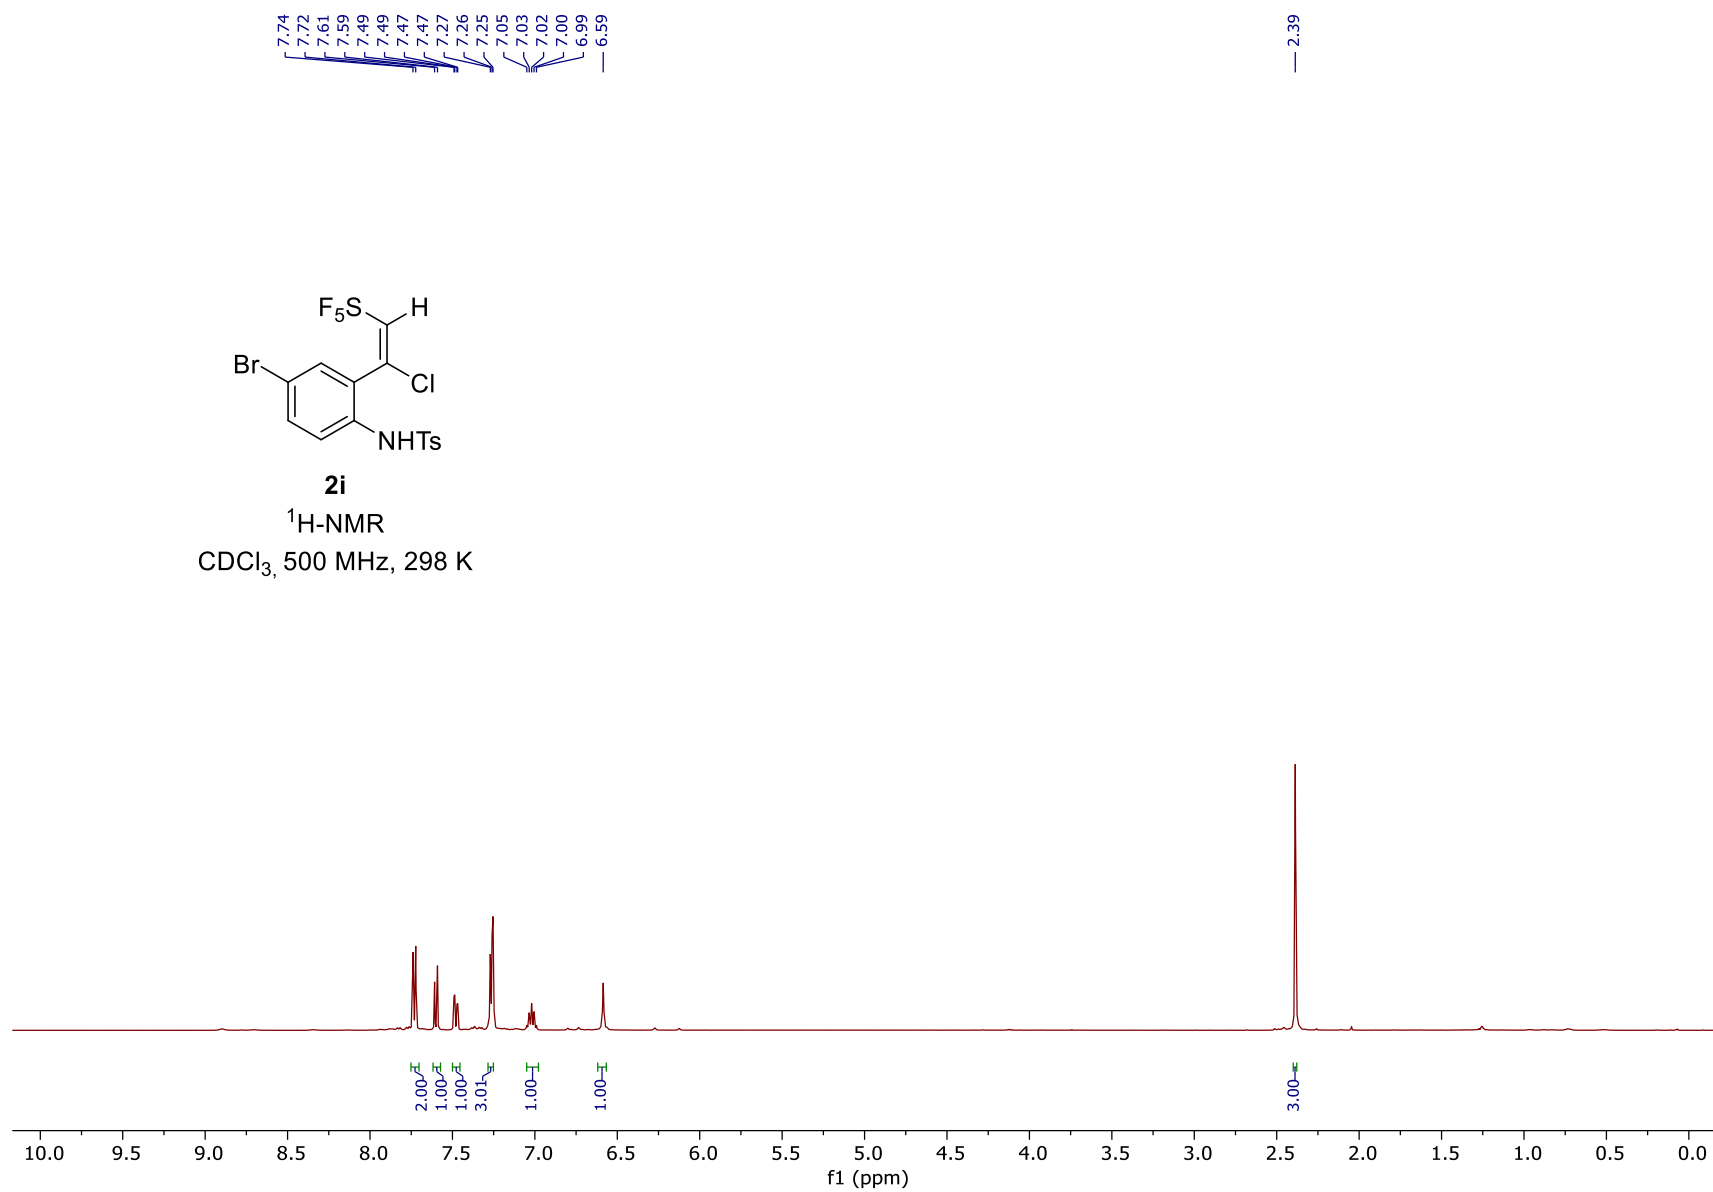

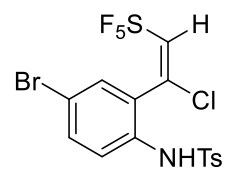**2i**<sup>13</sup>C-NMRCDCl<sub>3</sub>, 125 MHz, 298 K

144.89  
142.89  
142.72  
142.54  
142.37  
142.19  
137.12  
137.07  
137.02  
135.79  
134.50  
132.85  
131.60  
129.95  
127.61  
127.00  
121.34  
116.91

77.41  
77.16  
76.91

21.72

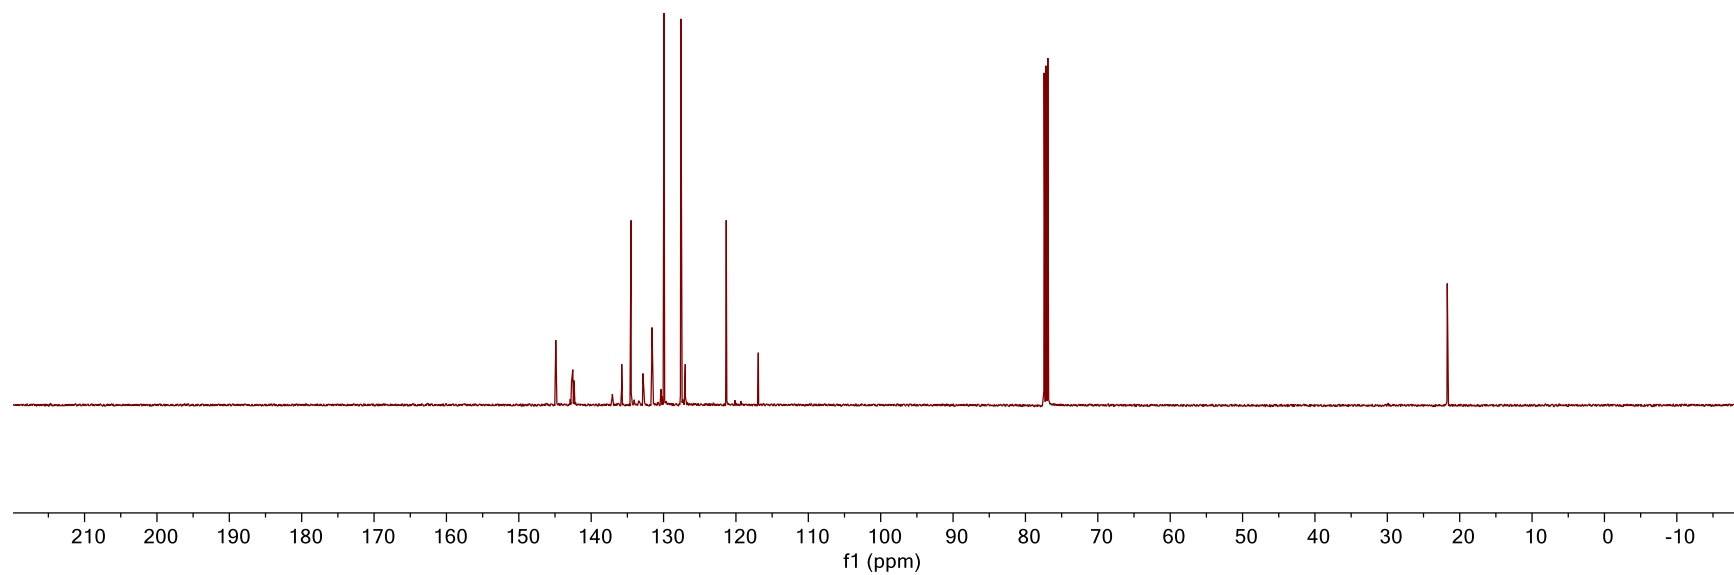

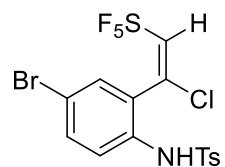**2i**<sup>19</sup>F-NMRCDCl<sub>3</sub>, 471 MHz, 298 K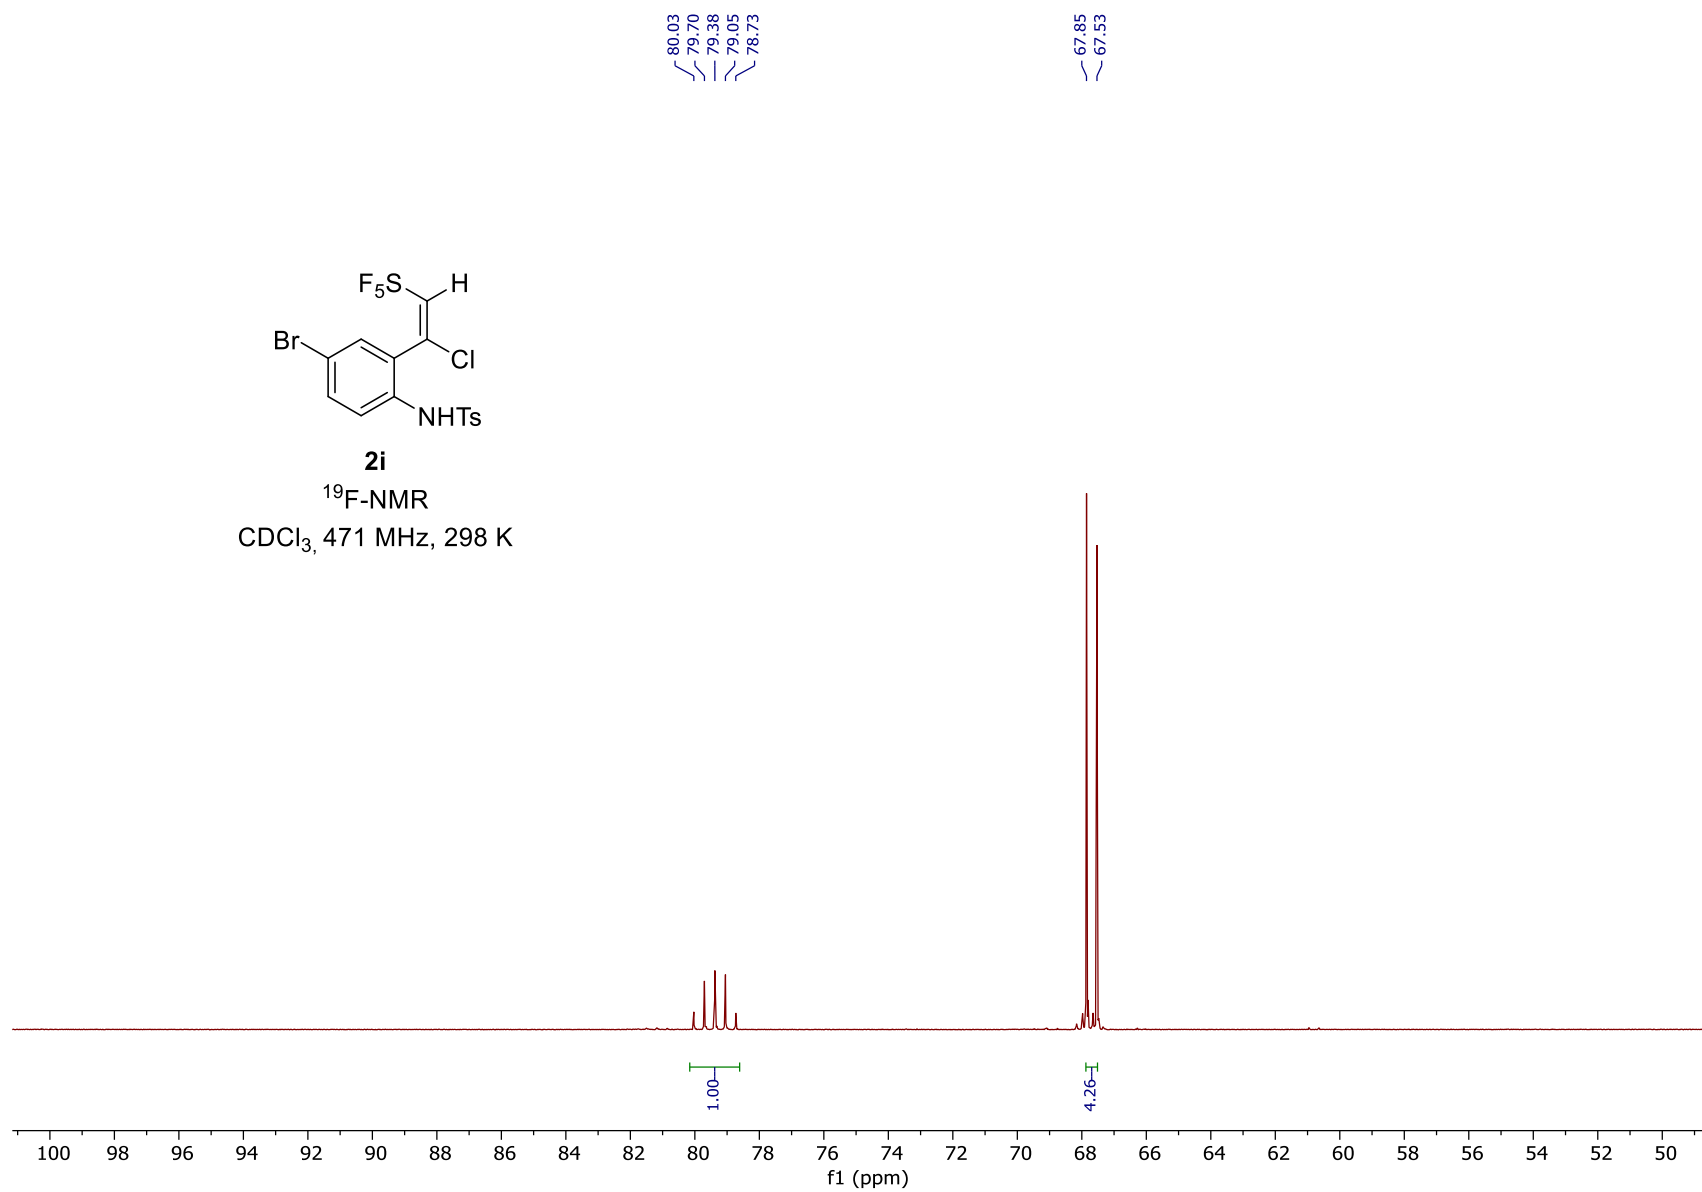



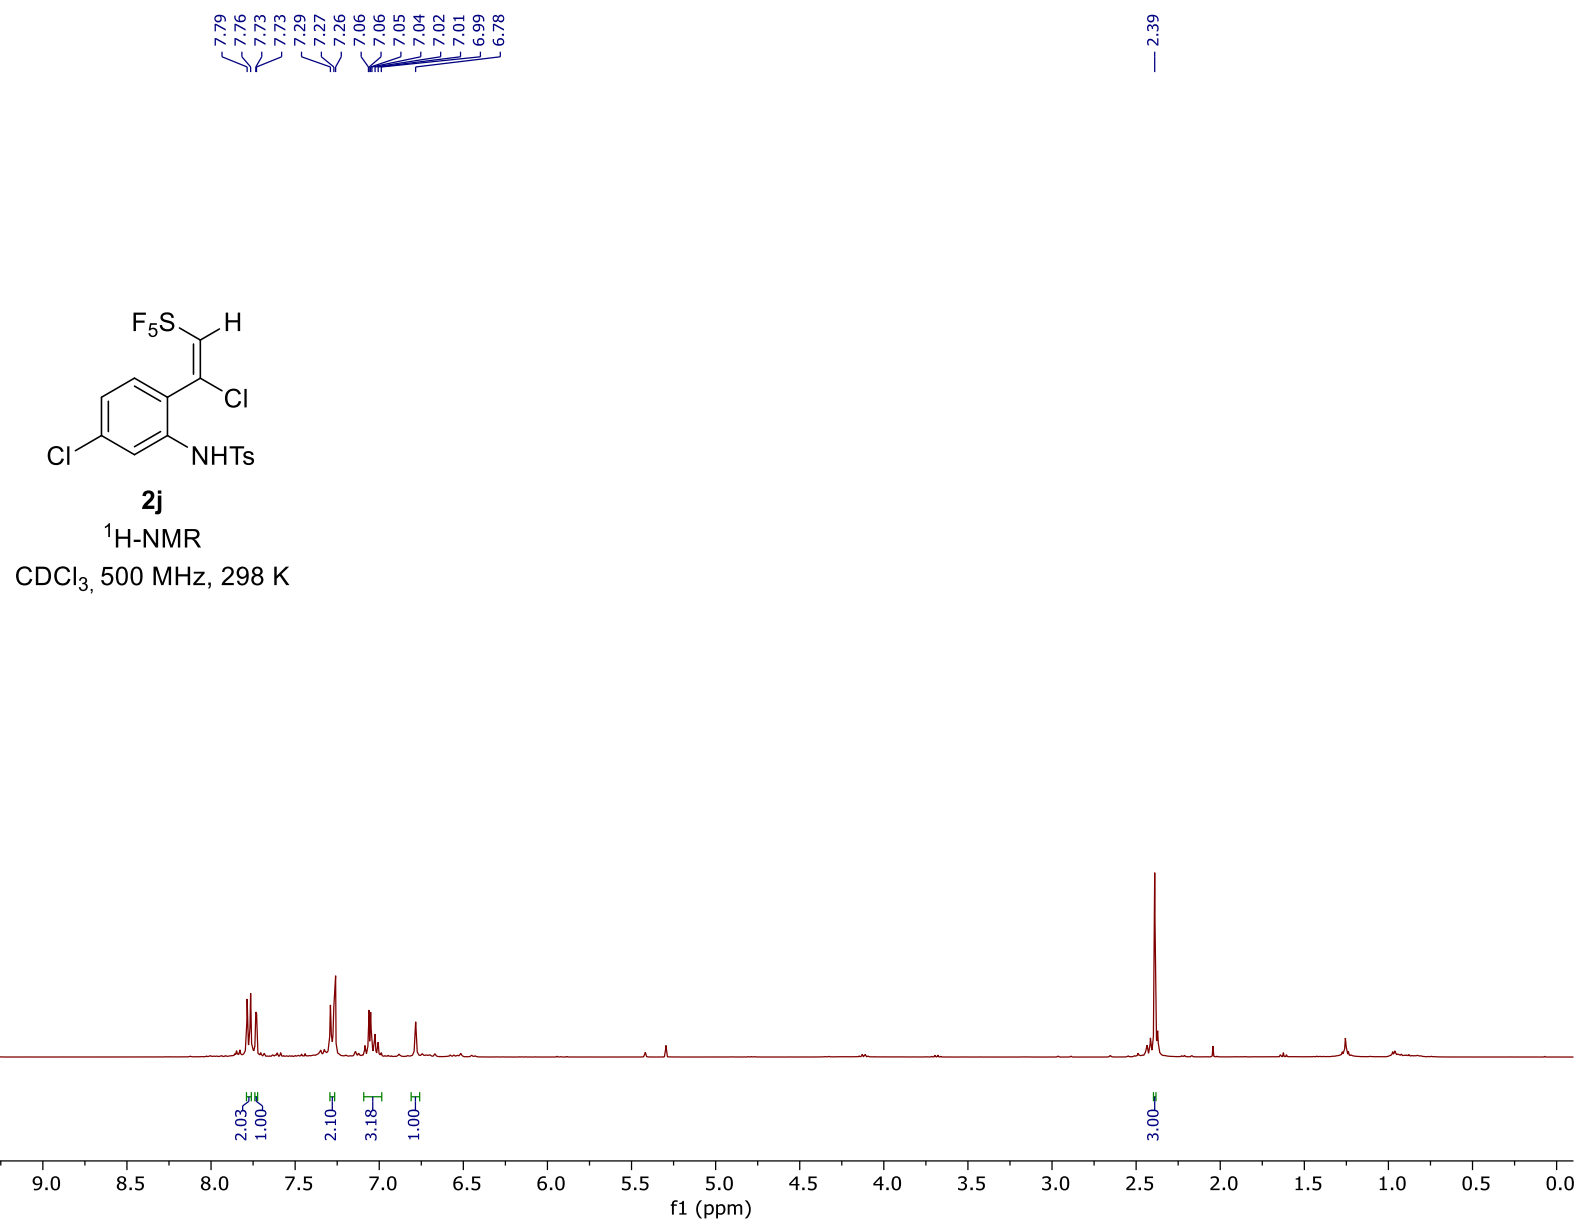

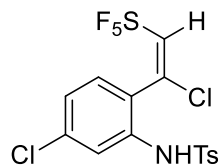**2j**<sup>13</sup>C-NMRCDCl<sub>3</sub>, 125 MHz, 298 K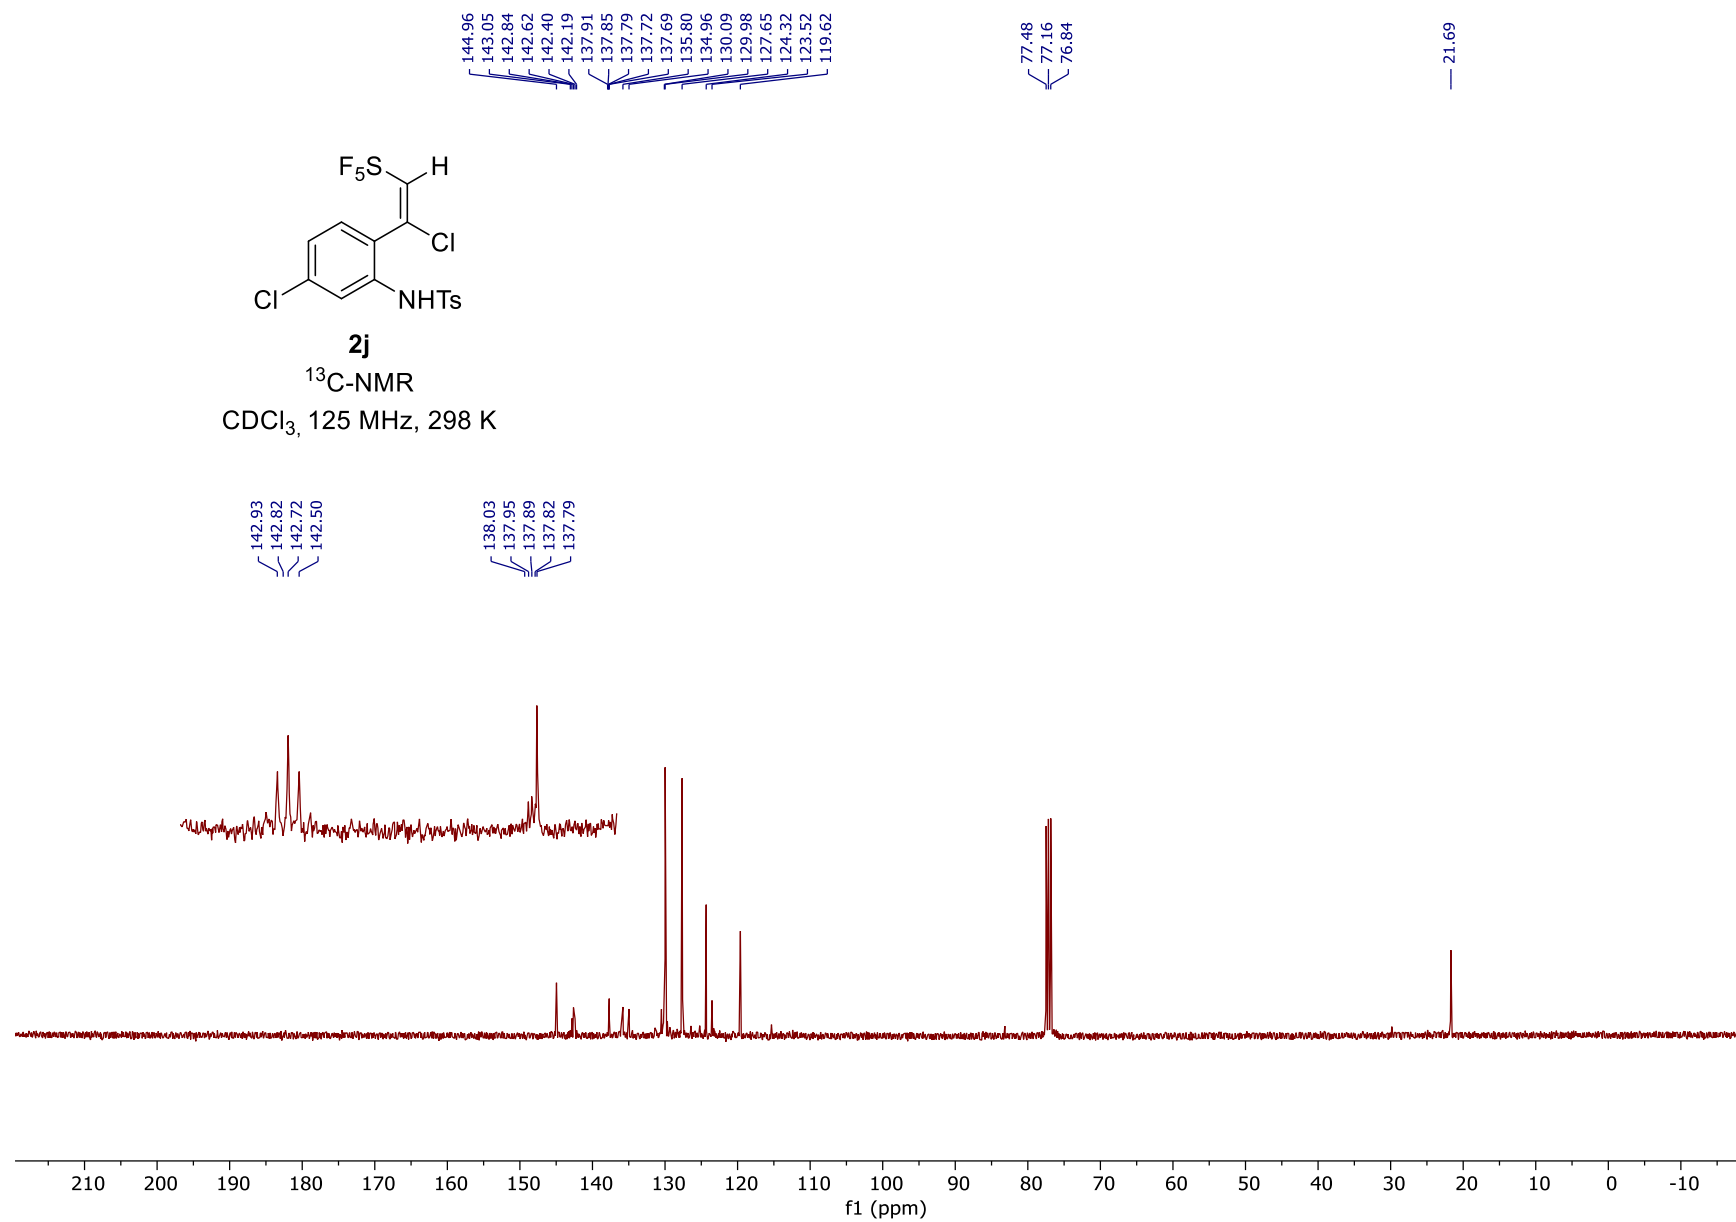

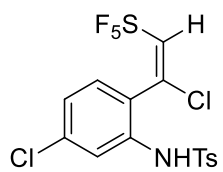**2j**<sup>19</sup>F-NMRCDCl<sub>3</sub>, 471 MHz, 298 K

80.56  
80.24  
79.91  
79.59  
79.27

67.13  
66.81

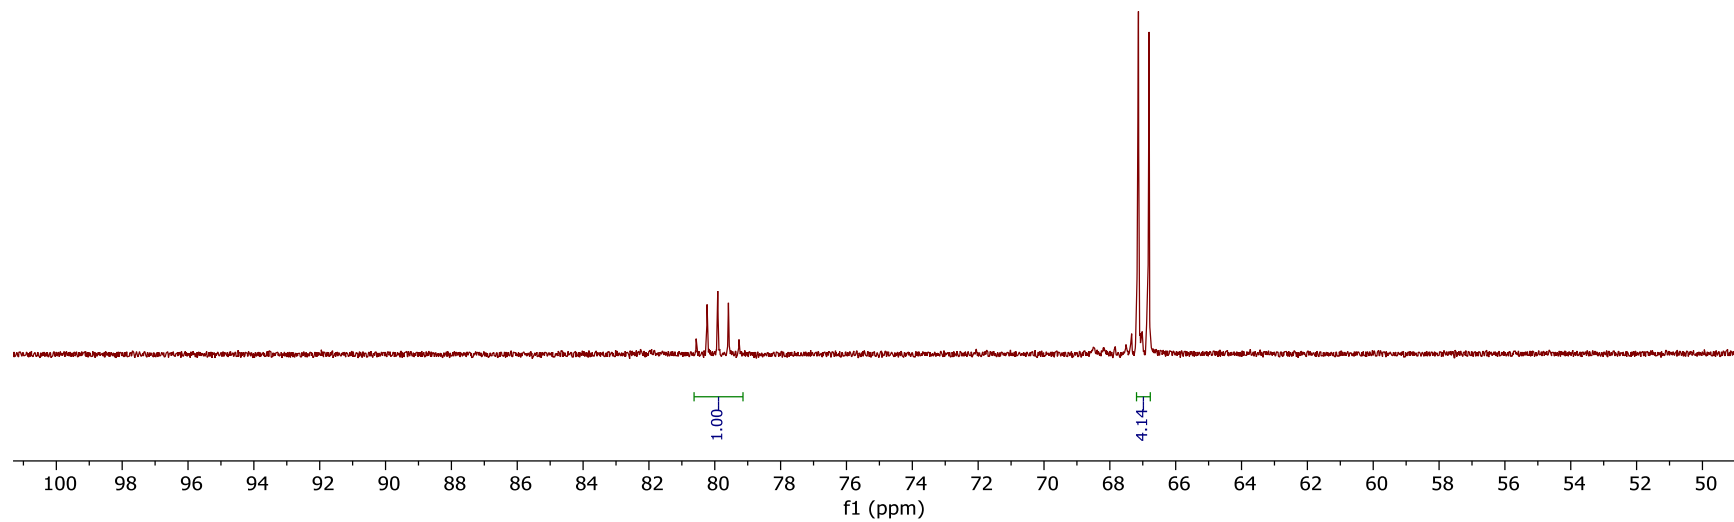

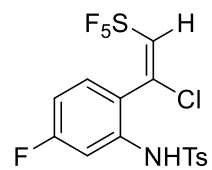**2k**<sup>1</sup>H-NMRCDCl<sub>3</sub>, 500 MHz, 298 K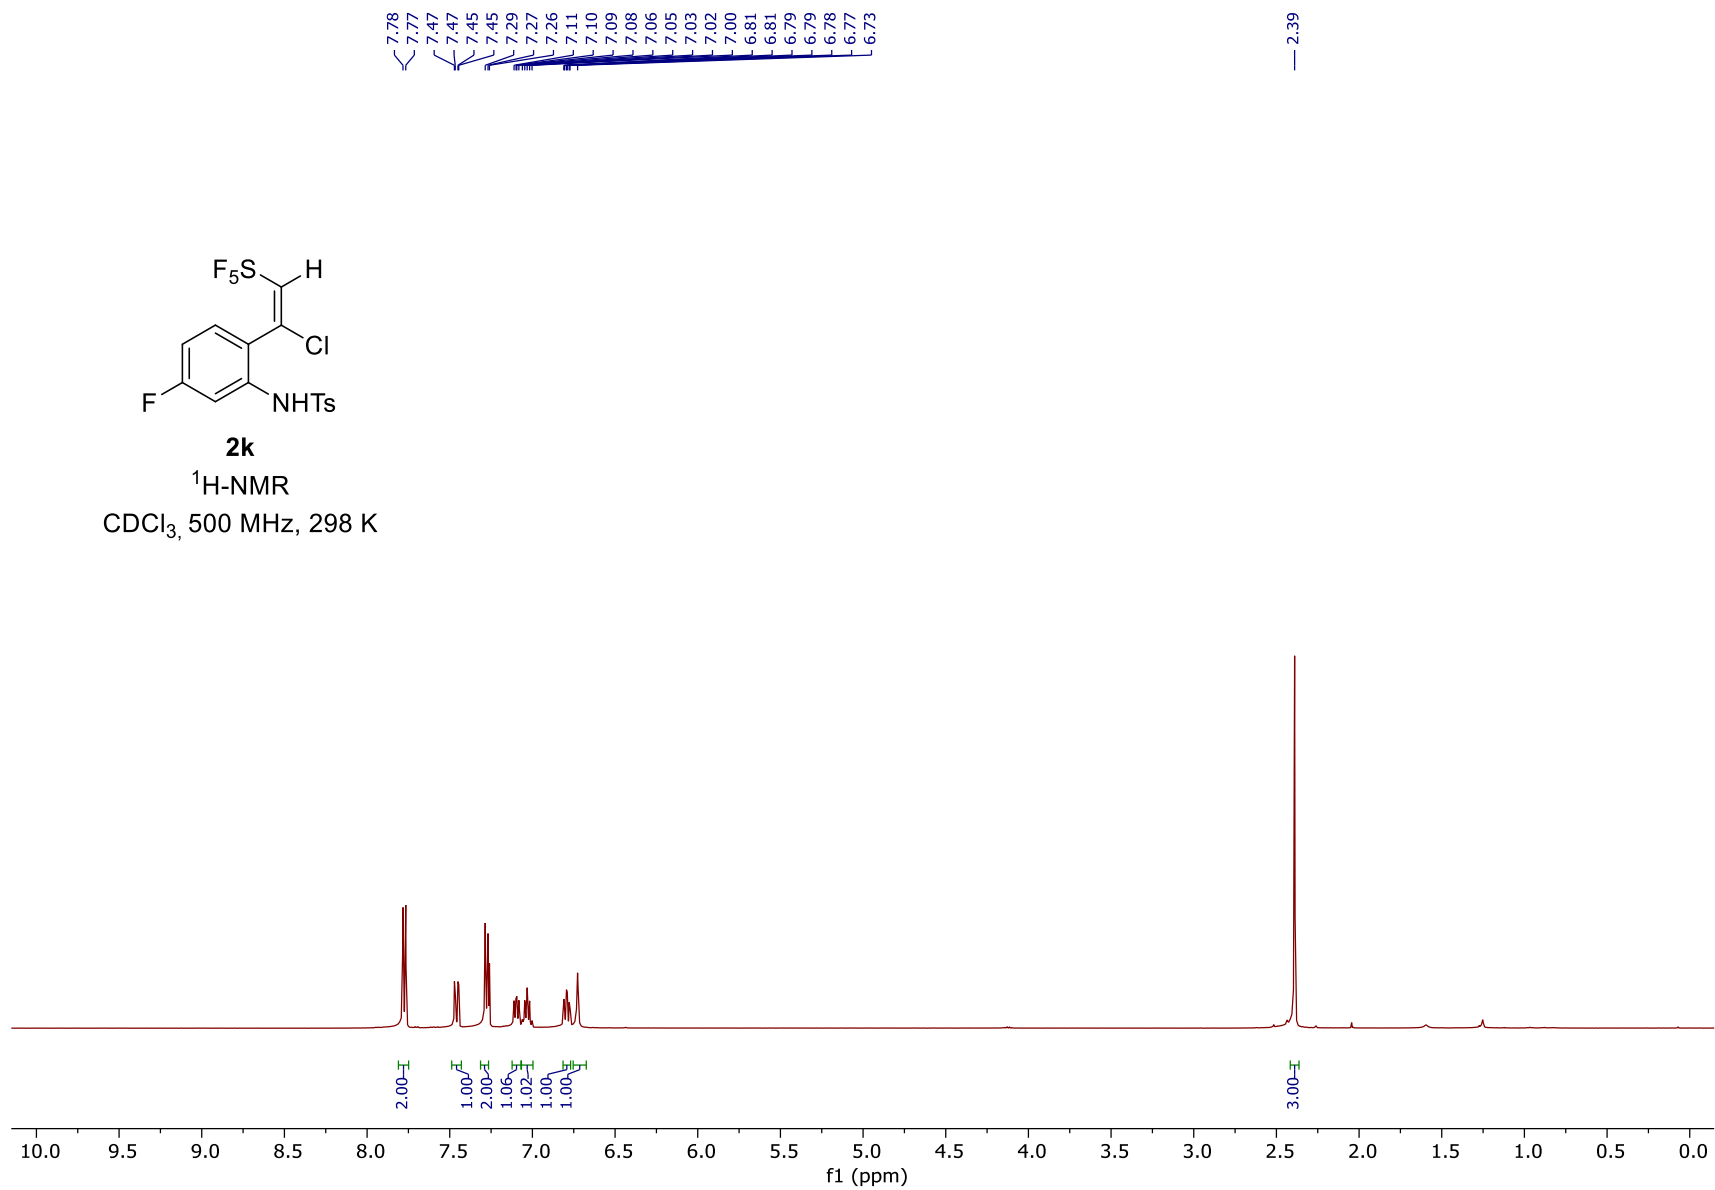

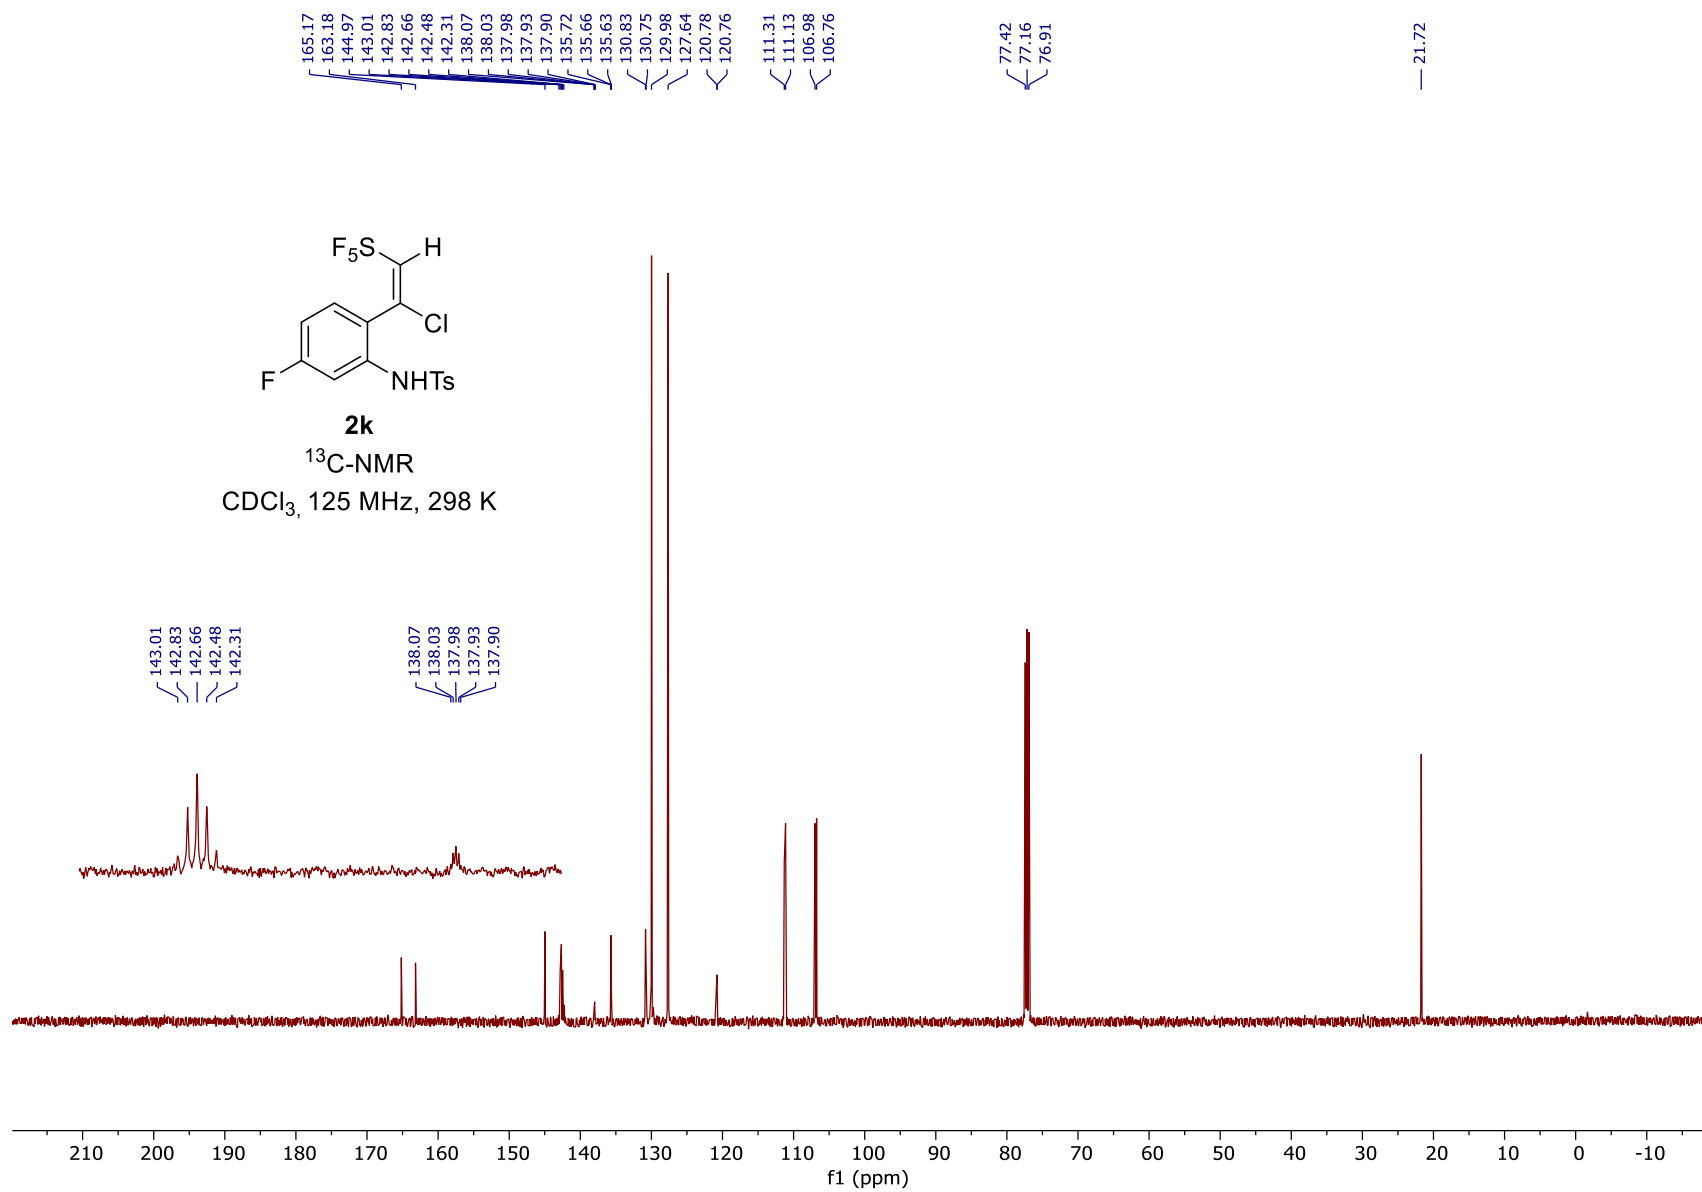

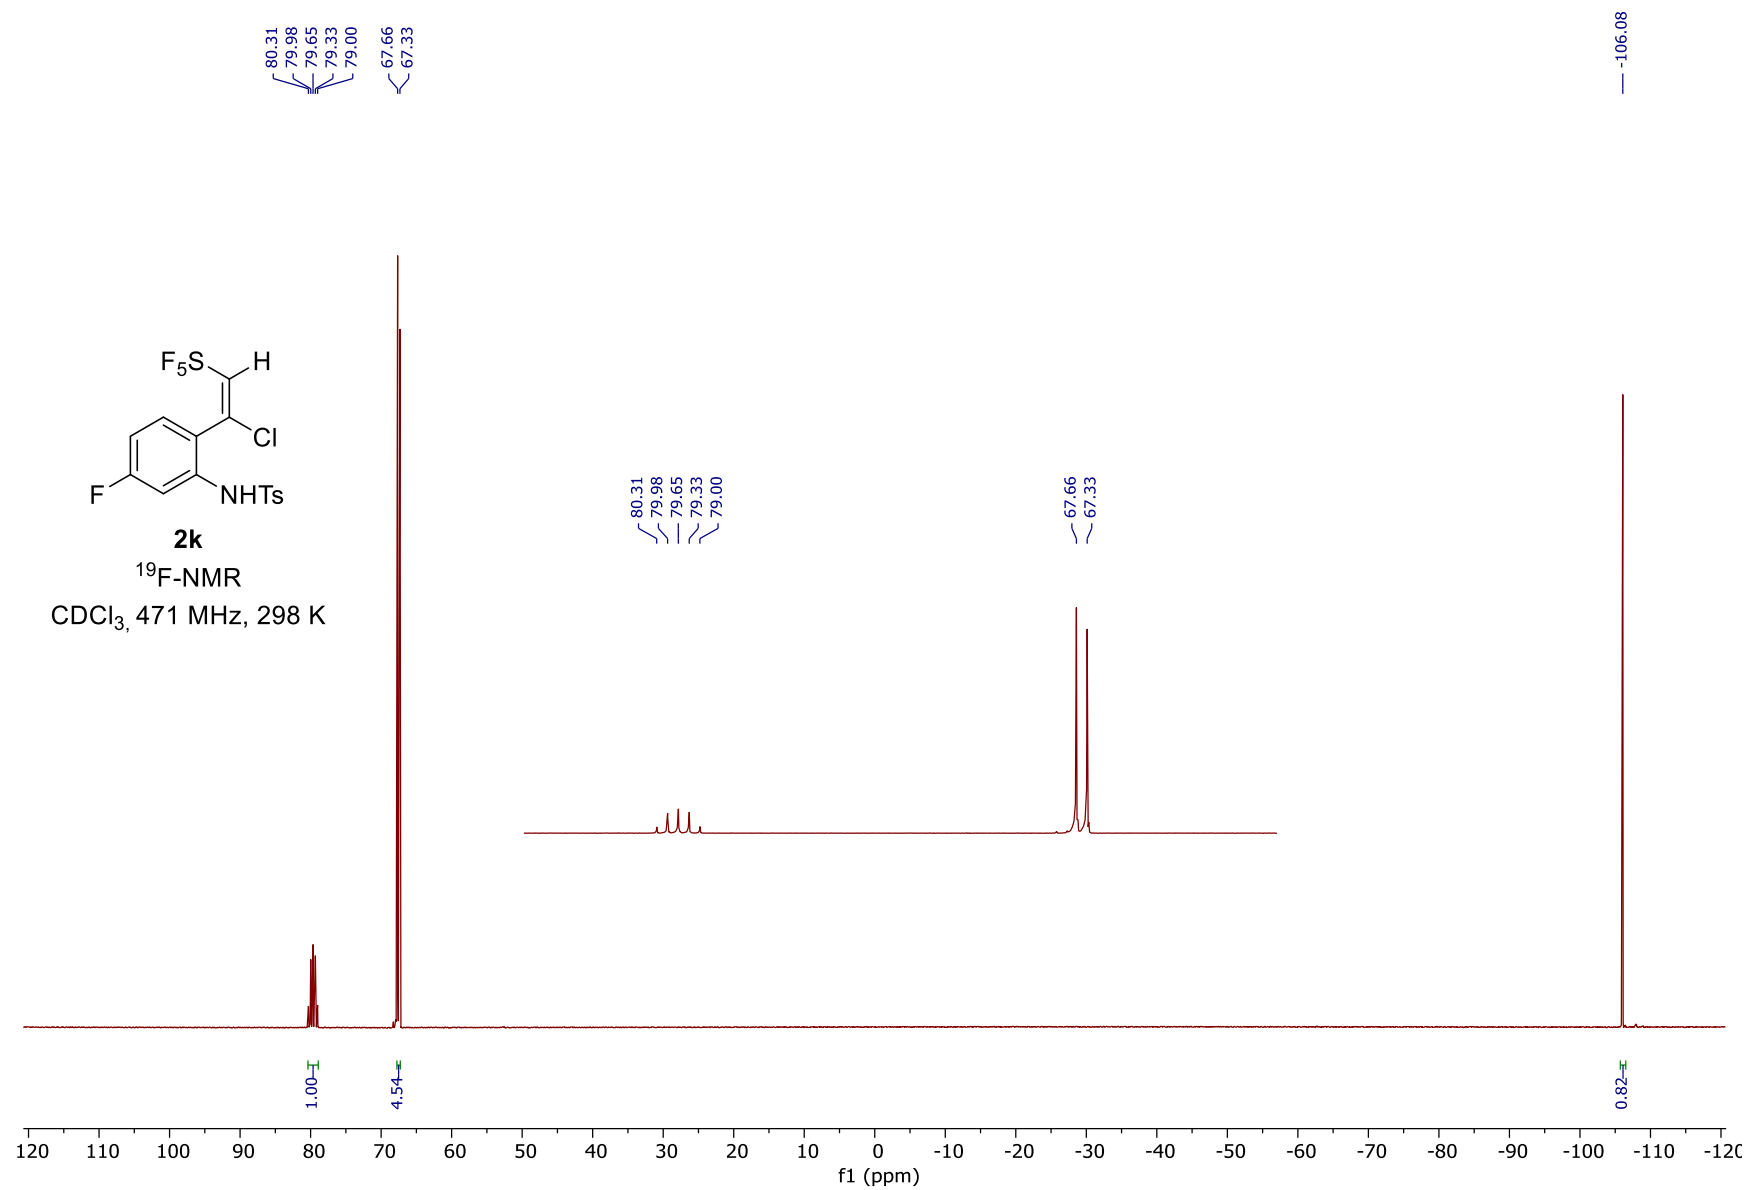

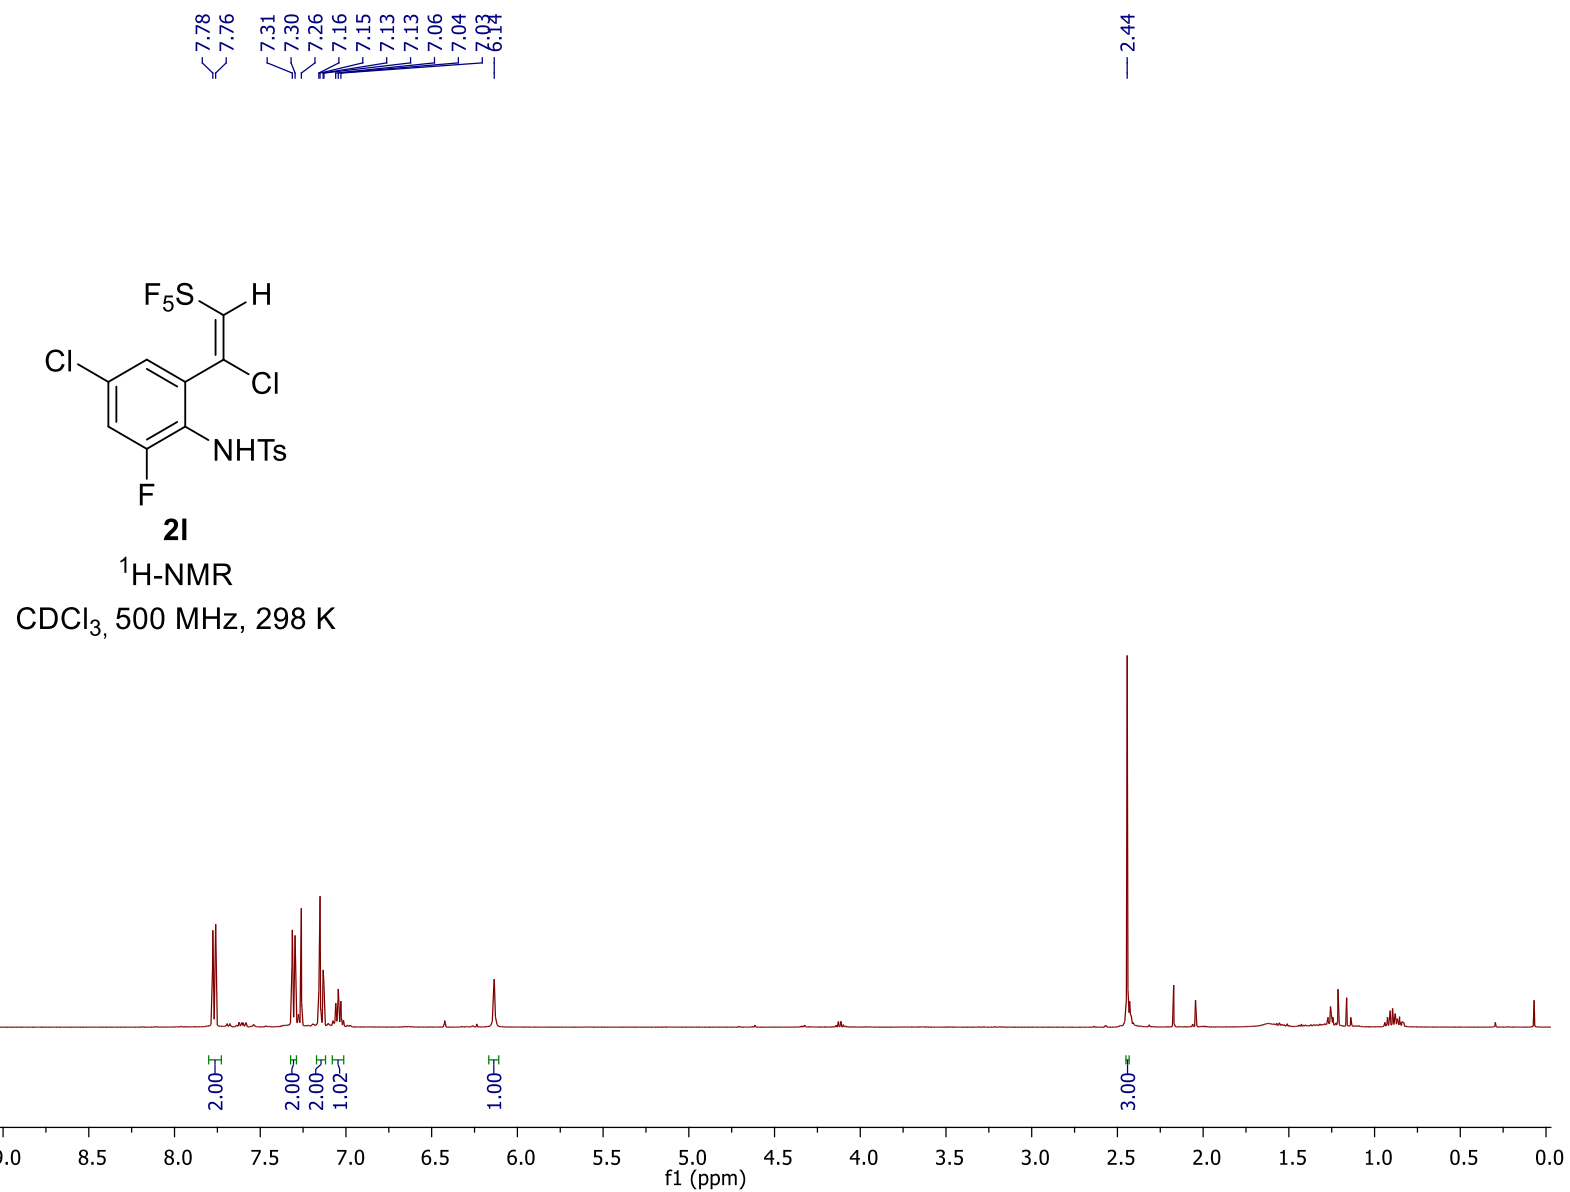

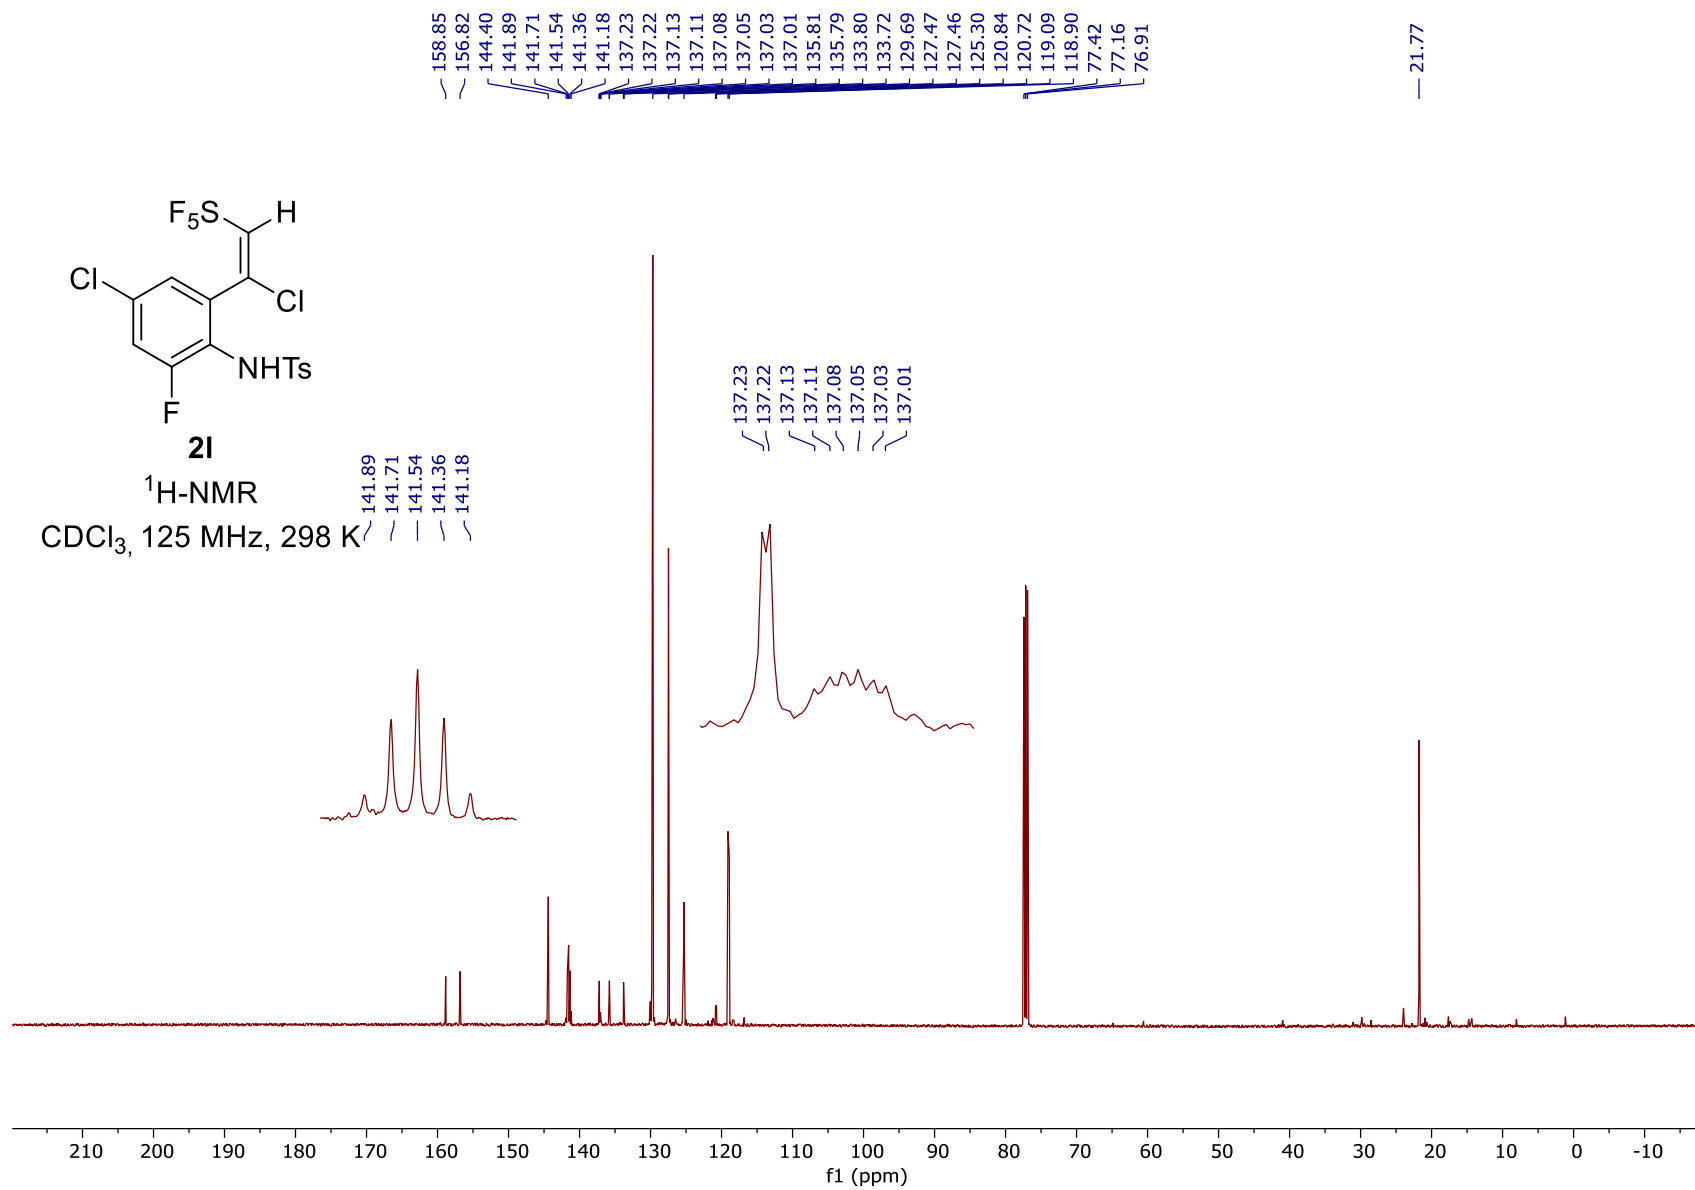



80.91  
80.58  
80.26  
79.93  
79.61  
68.20  
67.87

-113.36

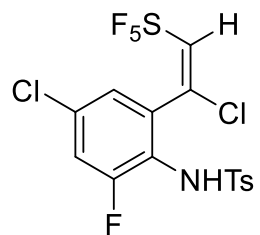

**21**

<sup>1</sup>H-NMR

CDCl<sub>3</sub>, 471 MHz, 298 K

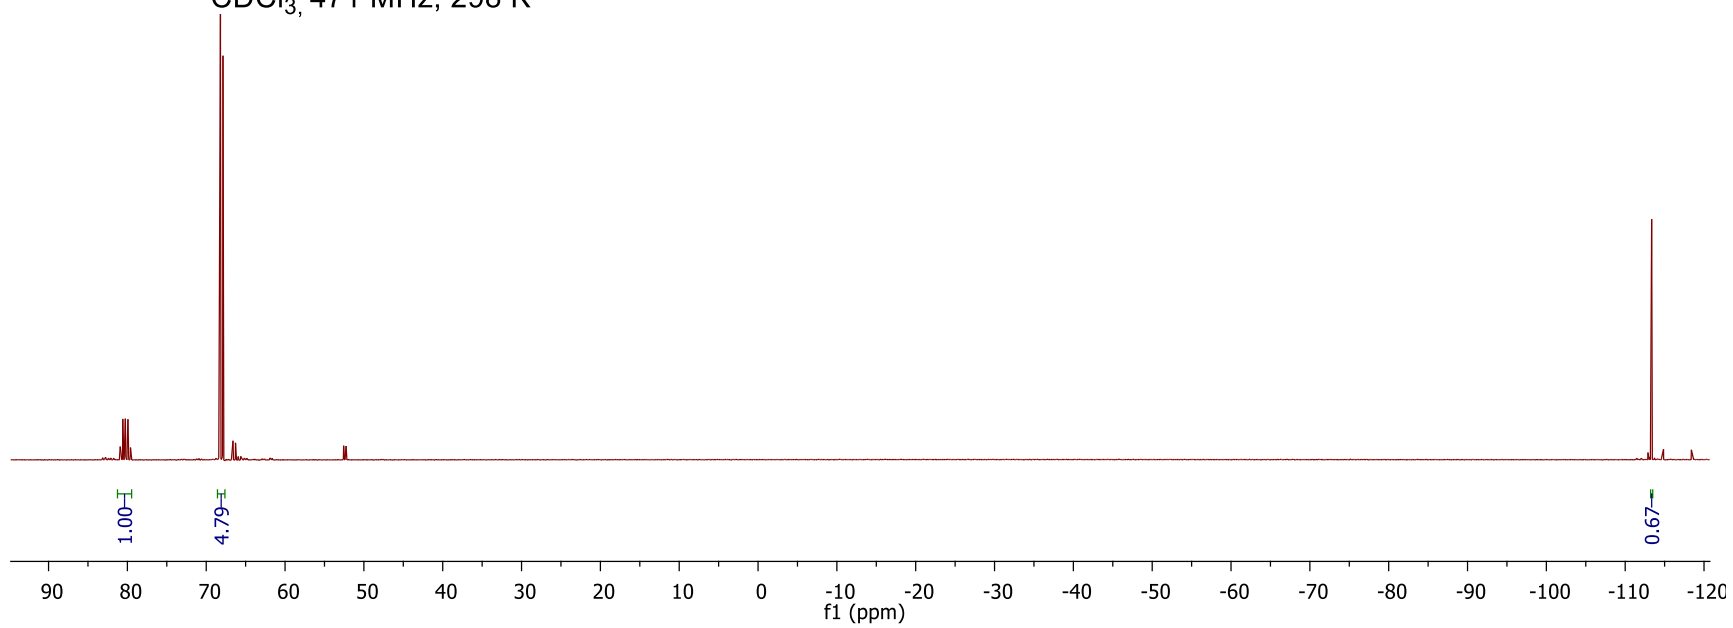

7.98  
7.96  
7.44  
7.43  
7.31  
7.29  
7.26  
7.11  
7.09  
7.08  
7.06  
7.05

— 2.42

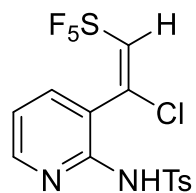

**2o**

<sup>1</sup>H-NMR

CDCl<sub>3</sub>, 500 MHz, 298 K

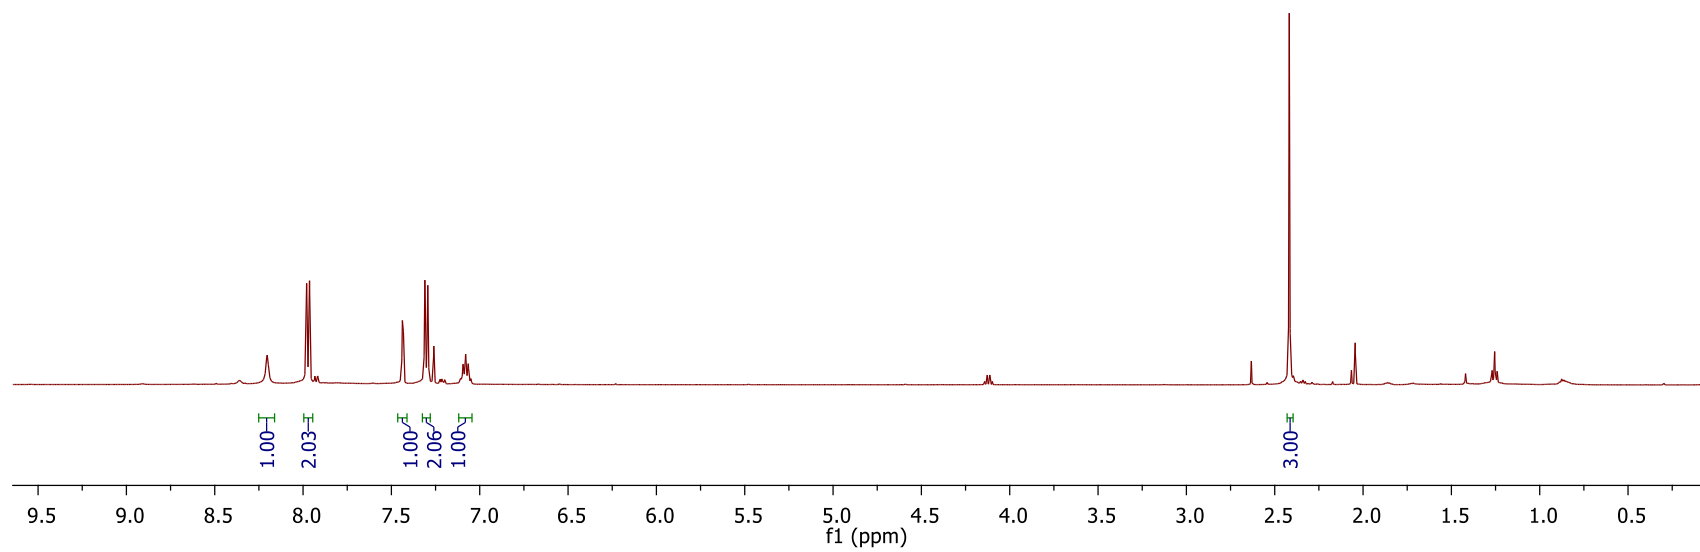

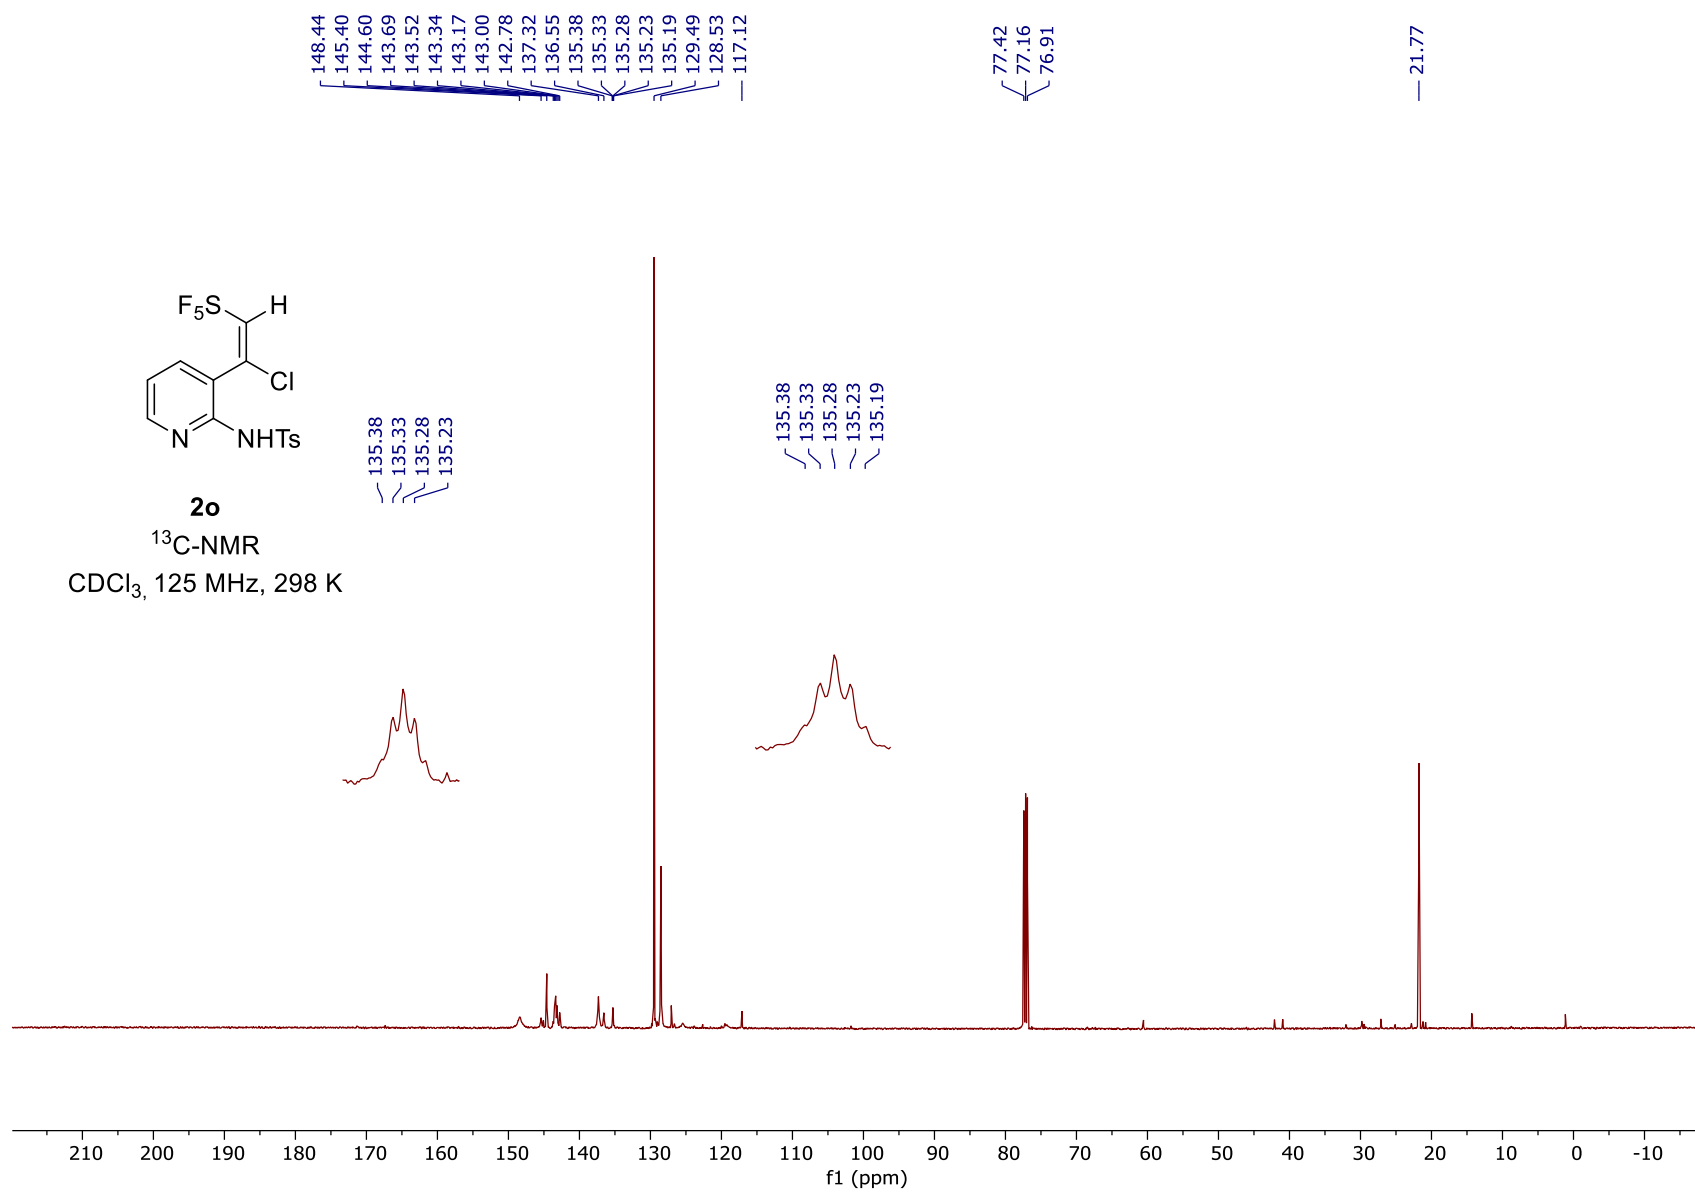

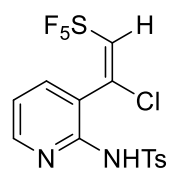**2o**

<sup>19</sup>F-NMR  
CDCl<sub>3</sub>, 471 MHz, 298 K

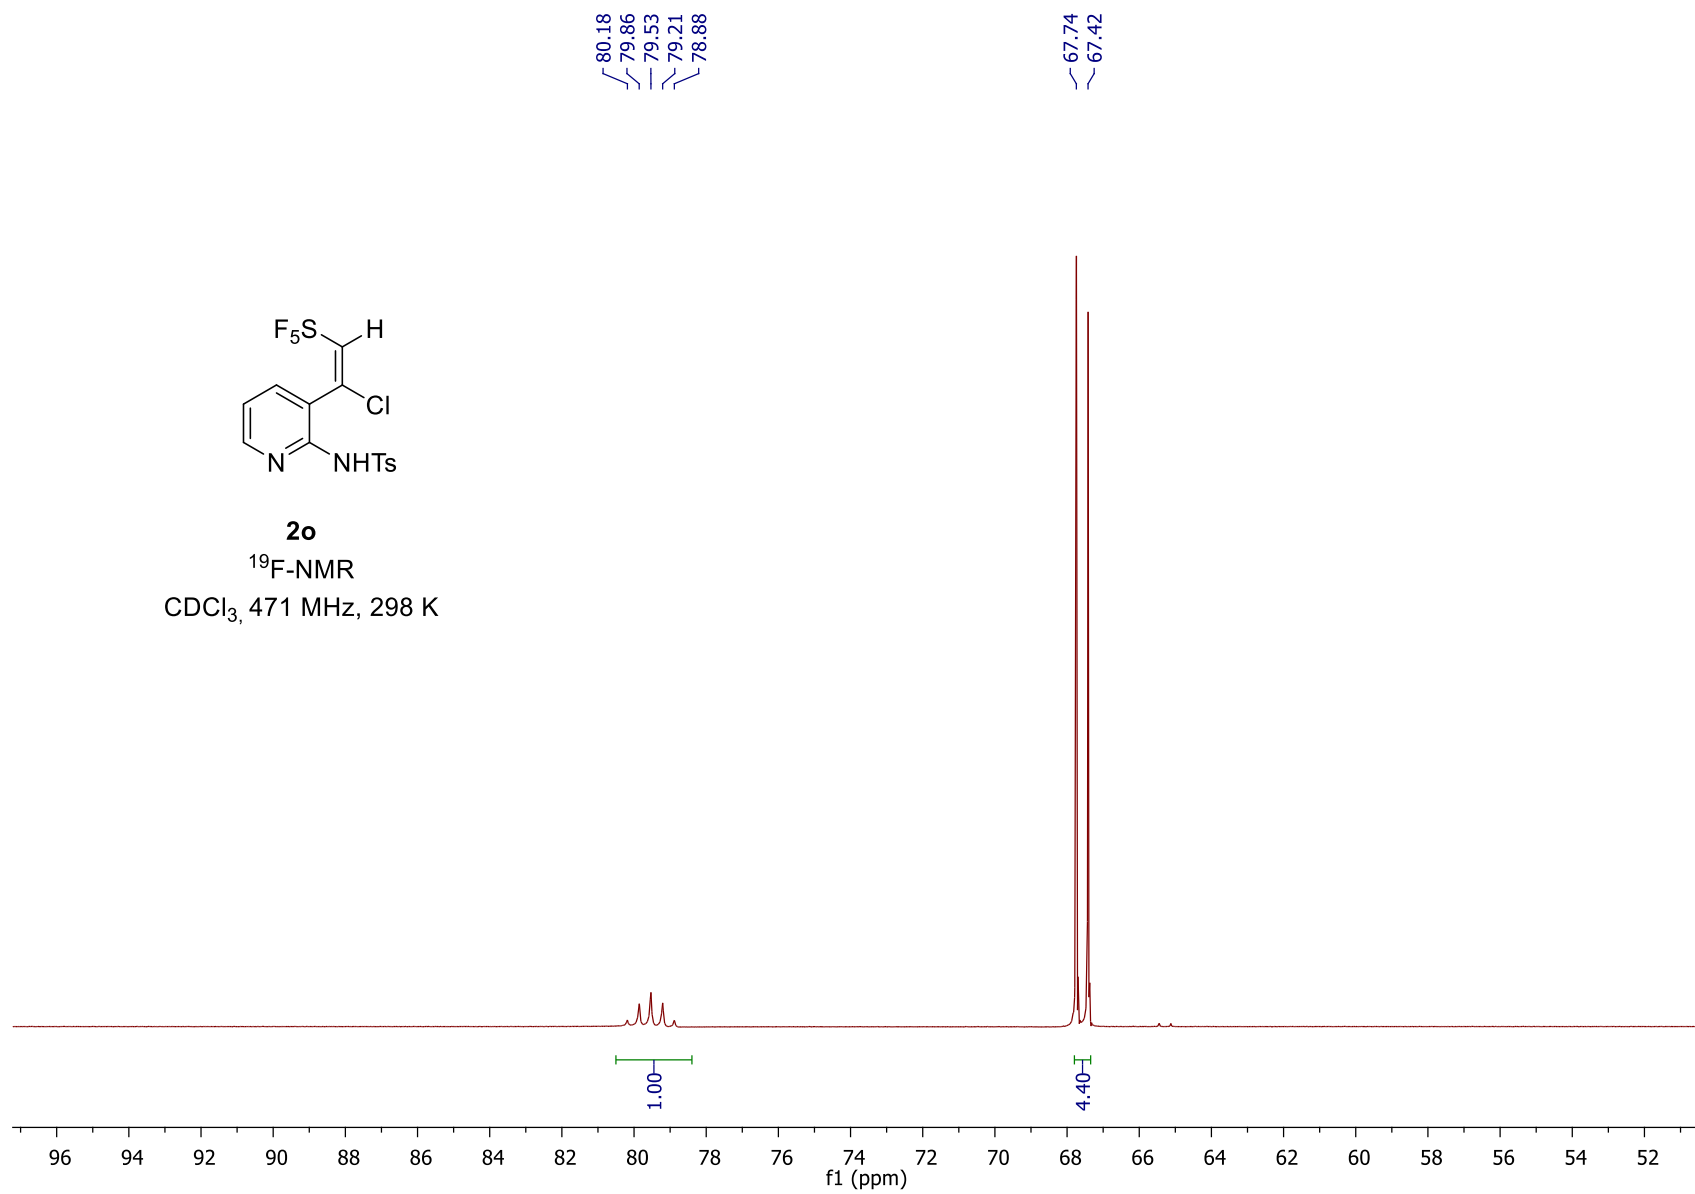

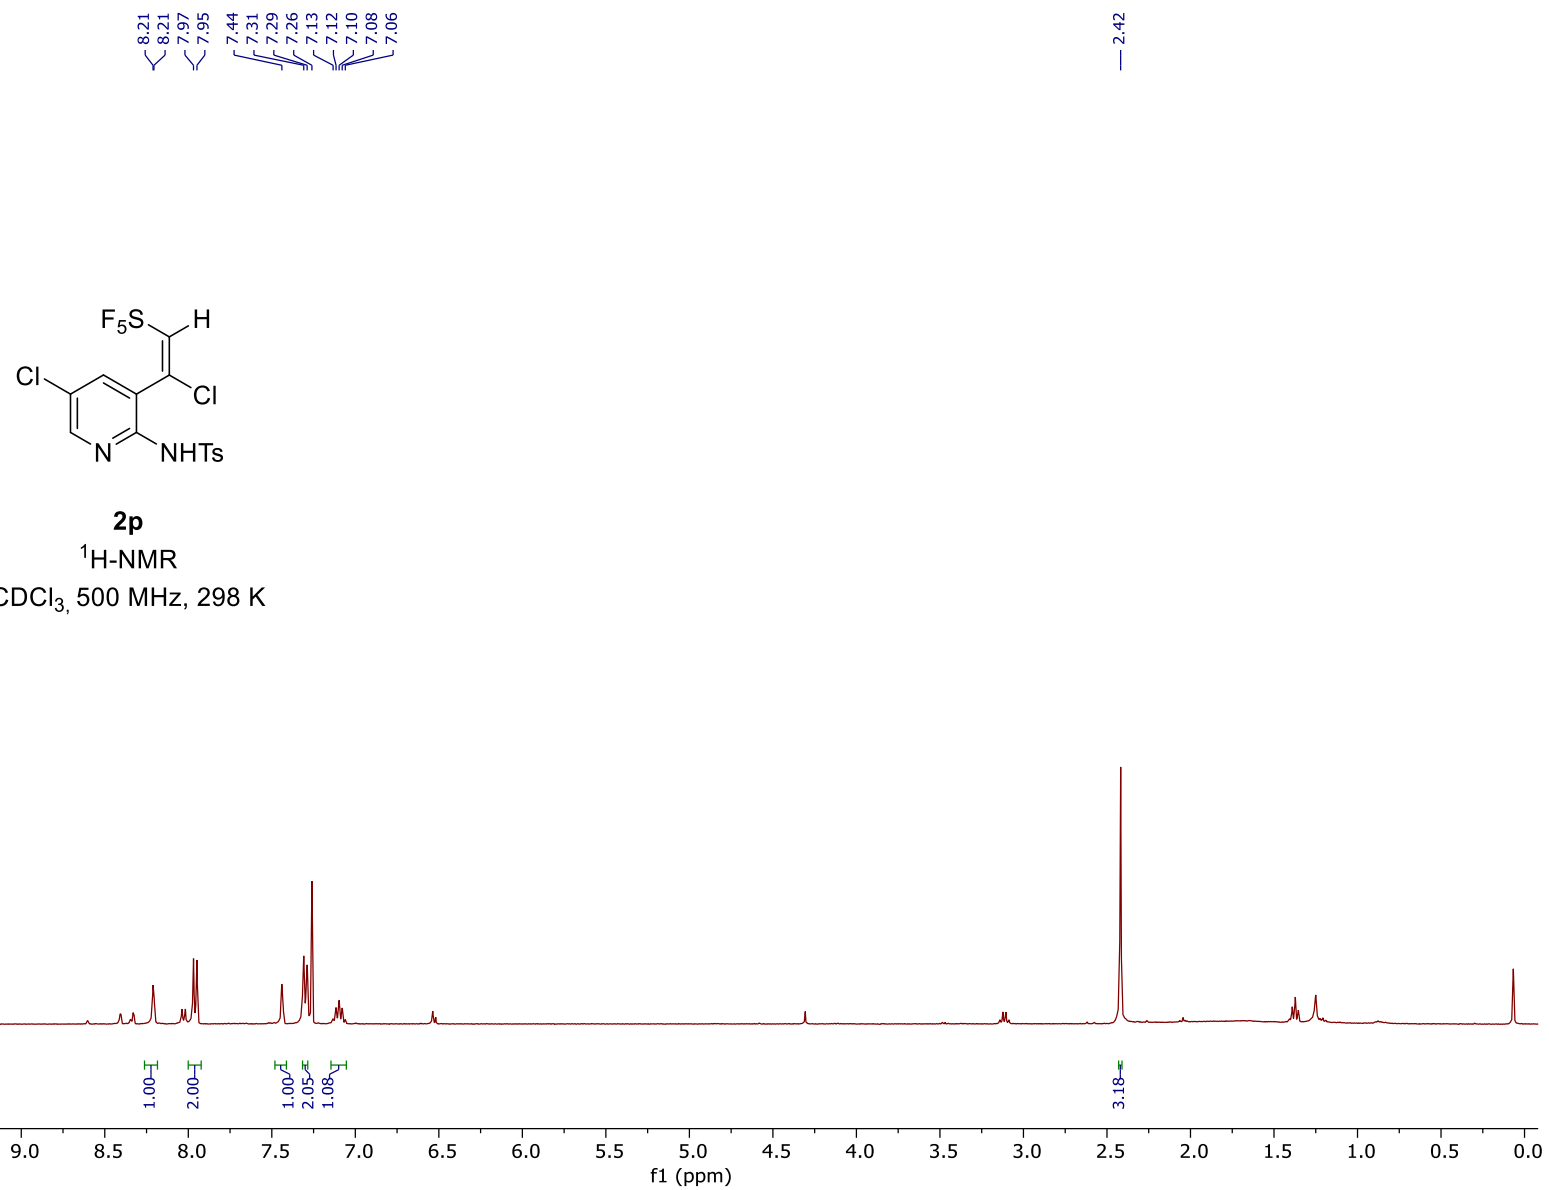

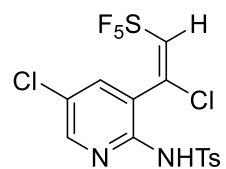**2p** $^{13}\text{C}$ -NMR $\text{CDCl}_3$ , 125 MHz, 298 K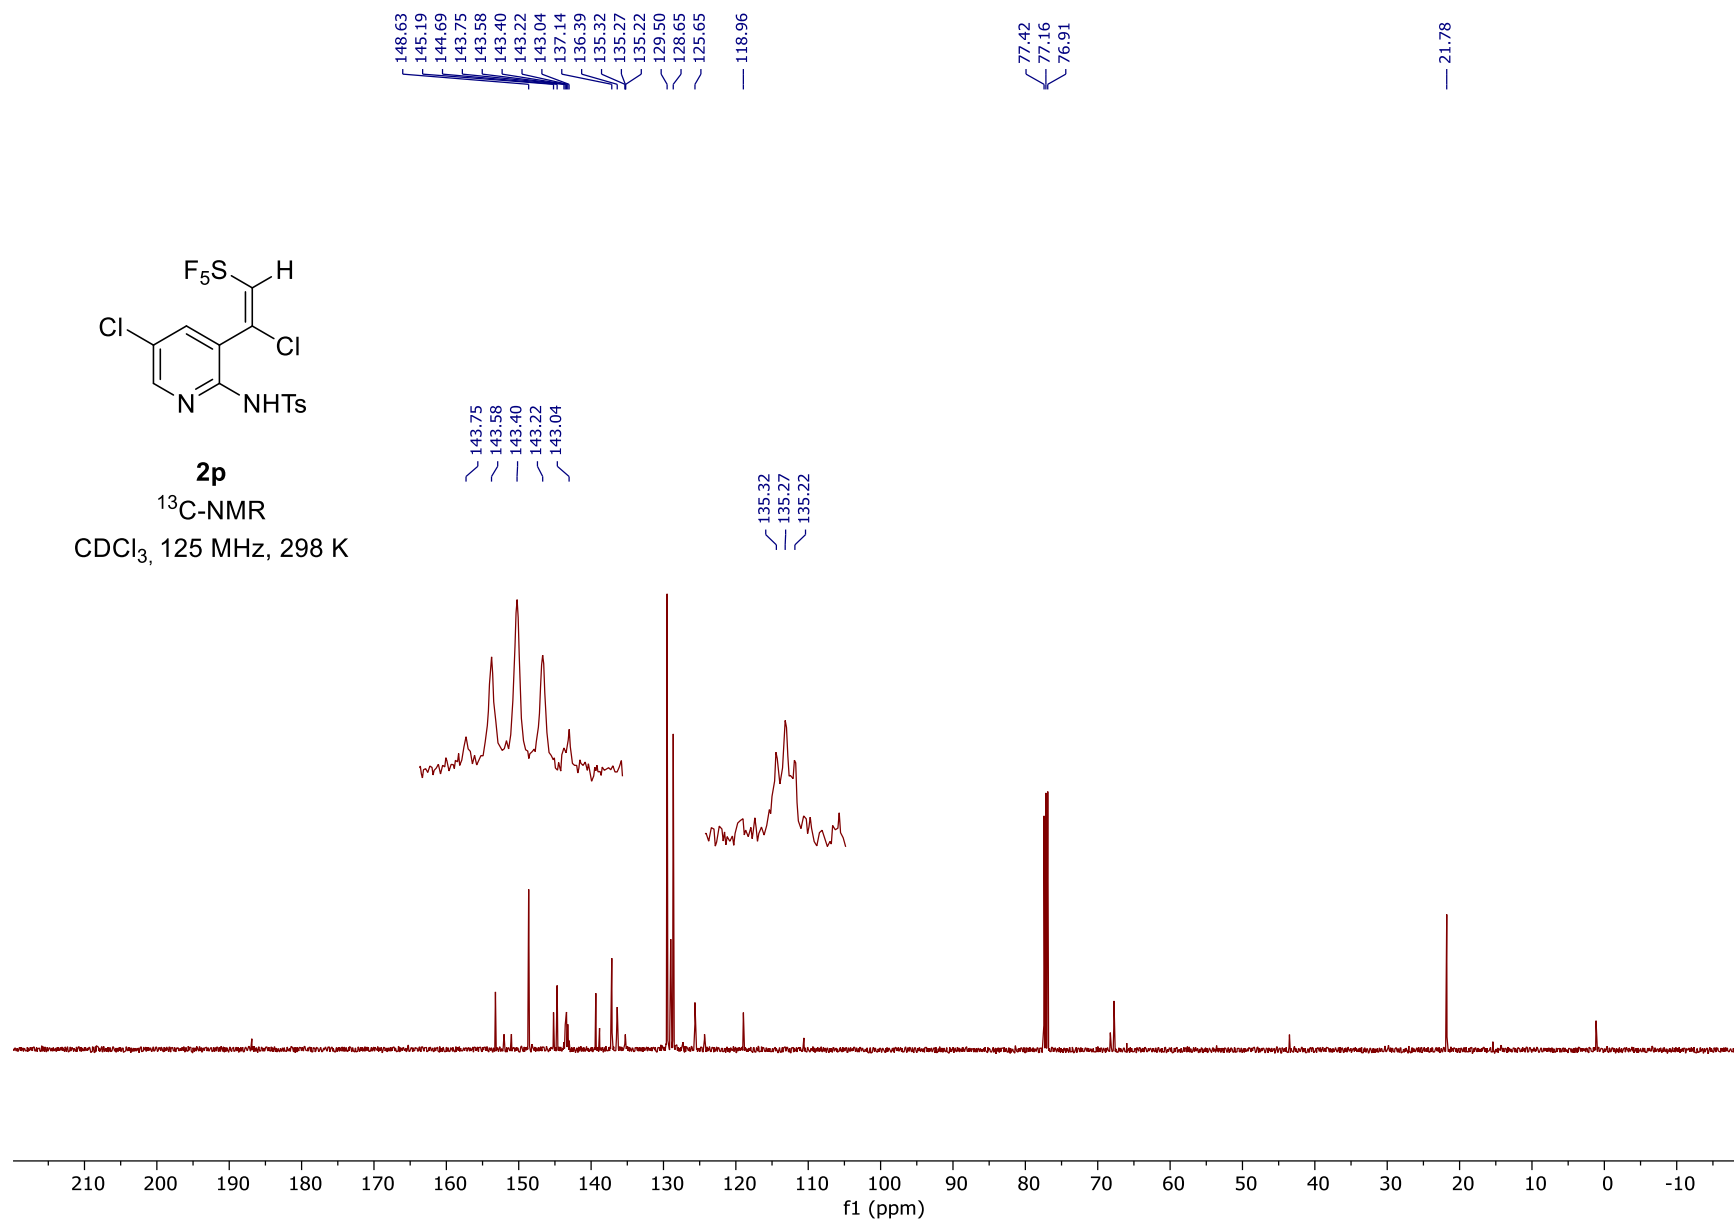

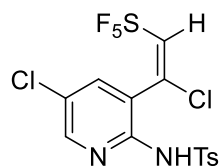**2p**<sup>19</sup>F-NMRCDCl<sub>3</sub>, 471 MHz, 298 K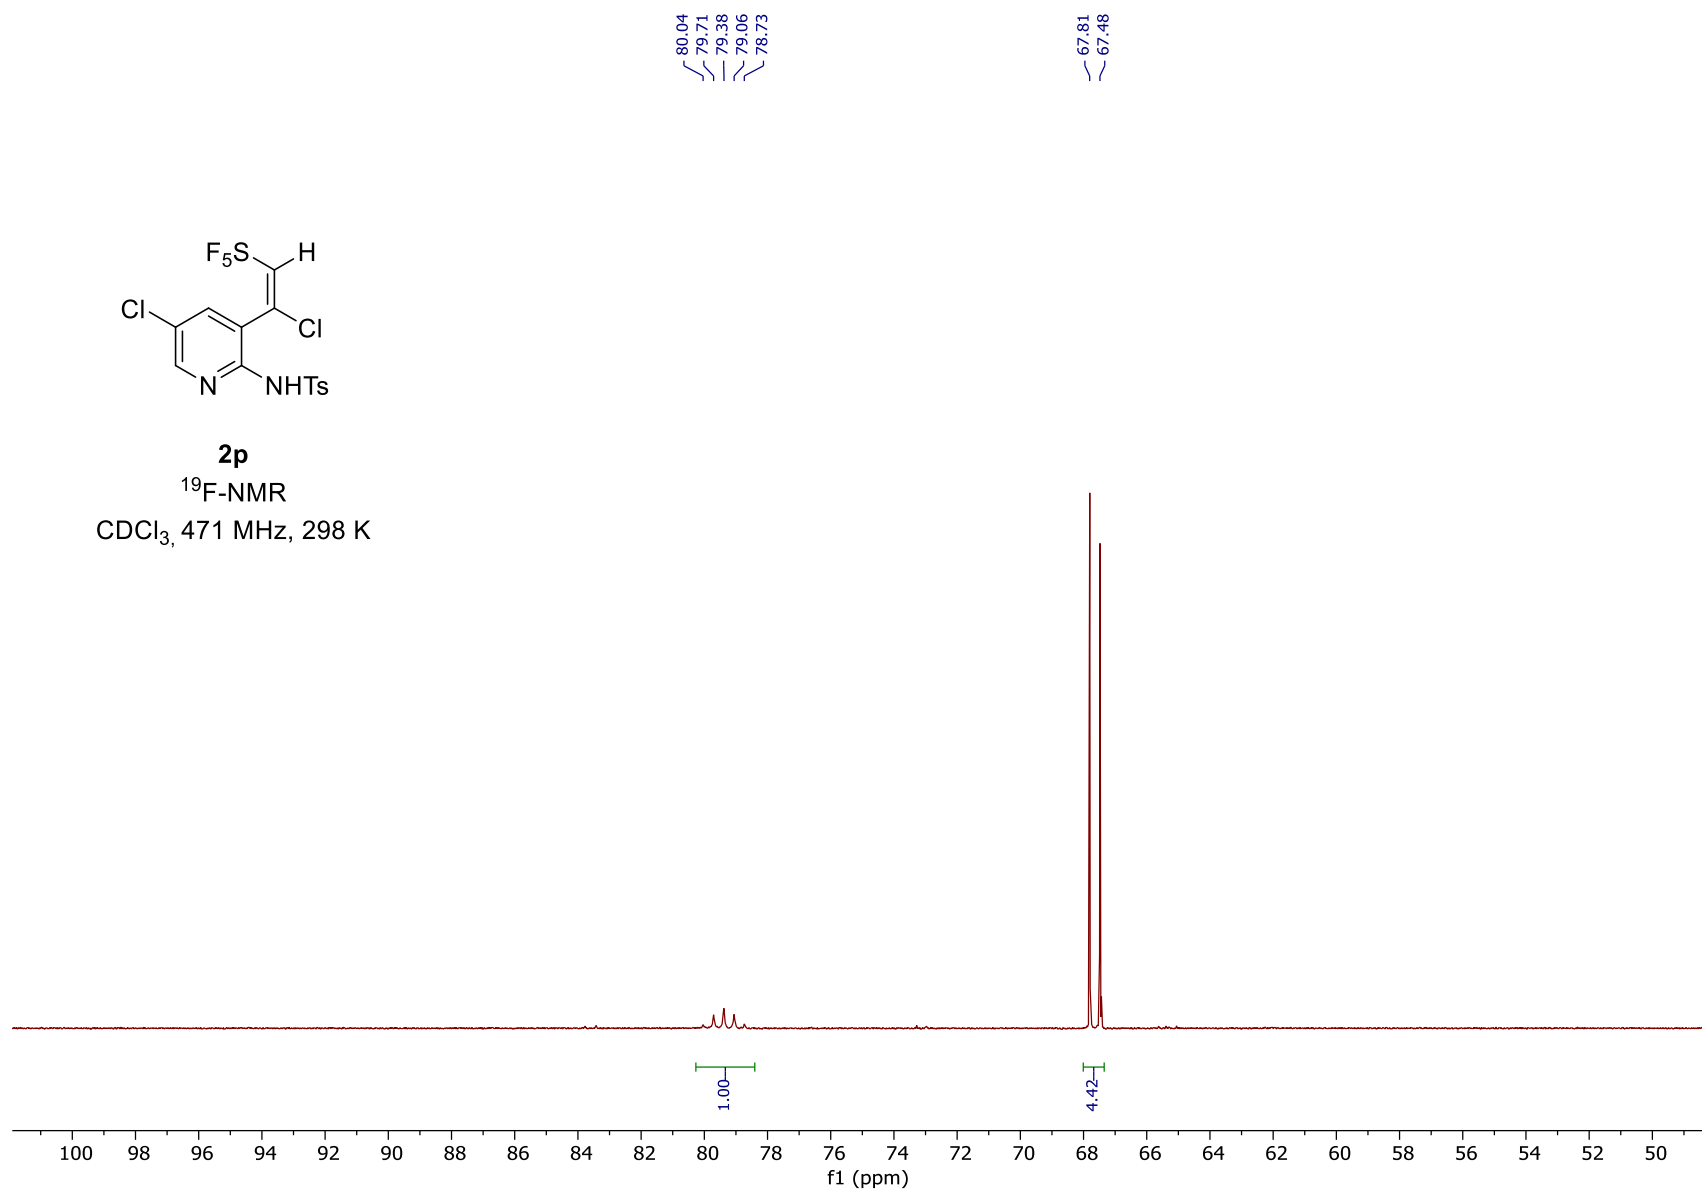

7.72  
7.72  
7.70  
7.70  
7.61  
7.60  
7.59  
7.59  
7.48  
7.48  
7.48  
7.42  
7.41  
7.40  
7.40  
7.26  
7.23  
7.22  
7.22  
7.21  
7.21  
7.21  
7.17  
7.17  
7.16  
7.16  
7.14  
7.14  
6.77

2.38

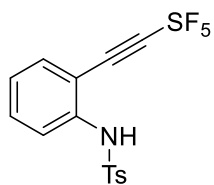

**3a**

<sup>1</sup>H-NMR  
CDCl<sub>3</sub>, 500 MHz, 298 K

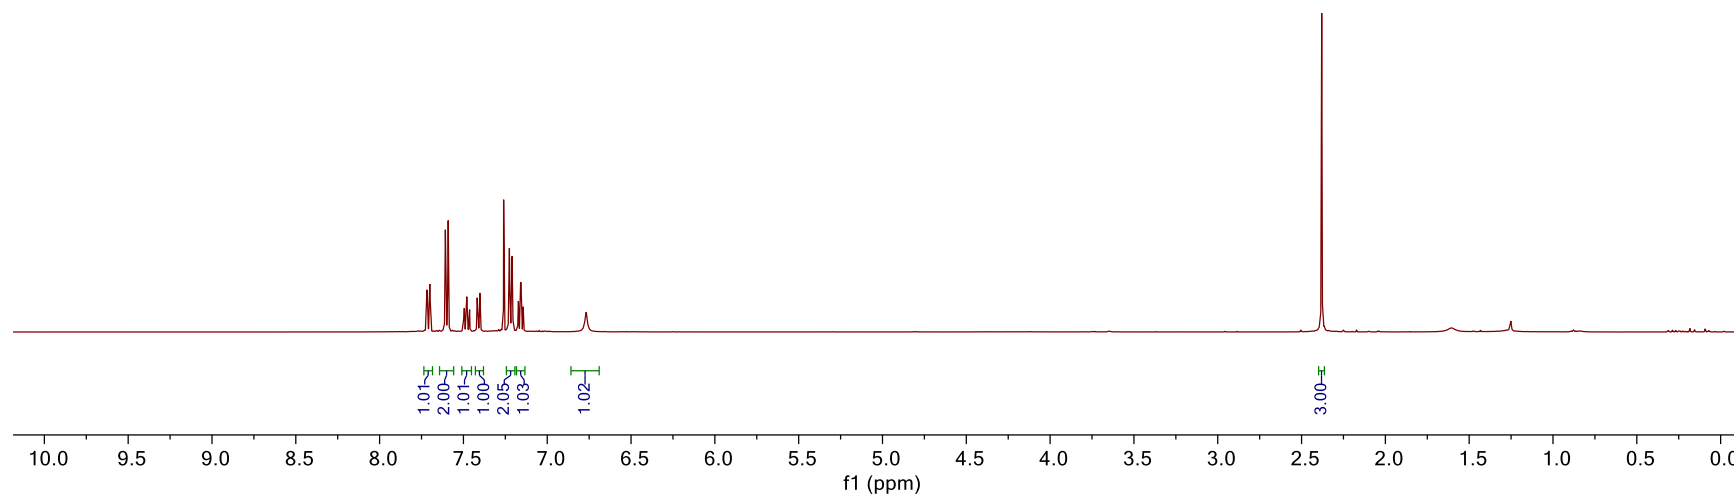



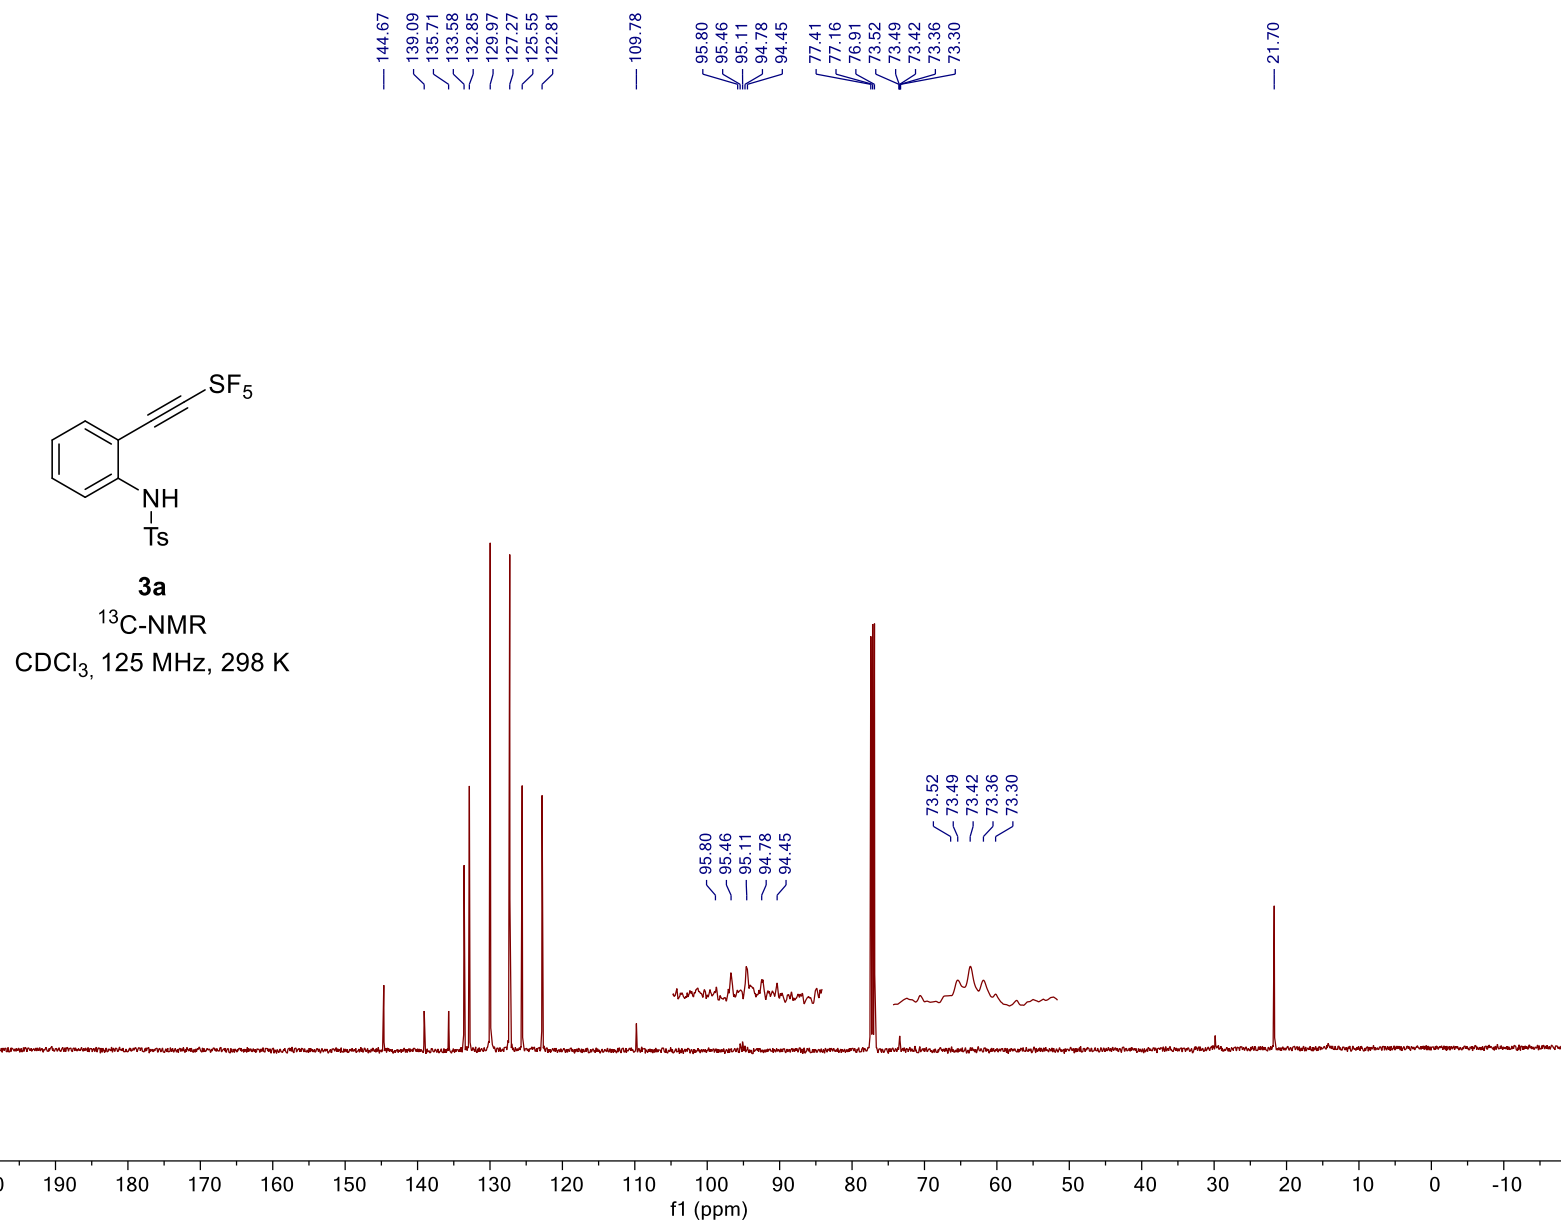

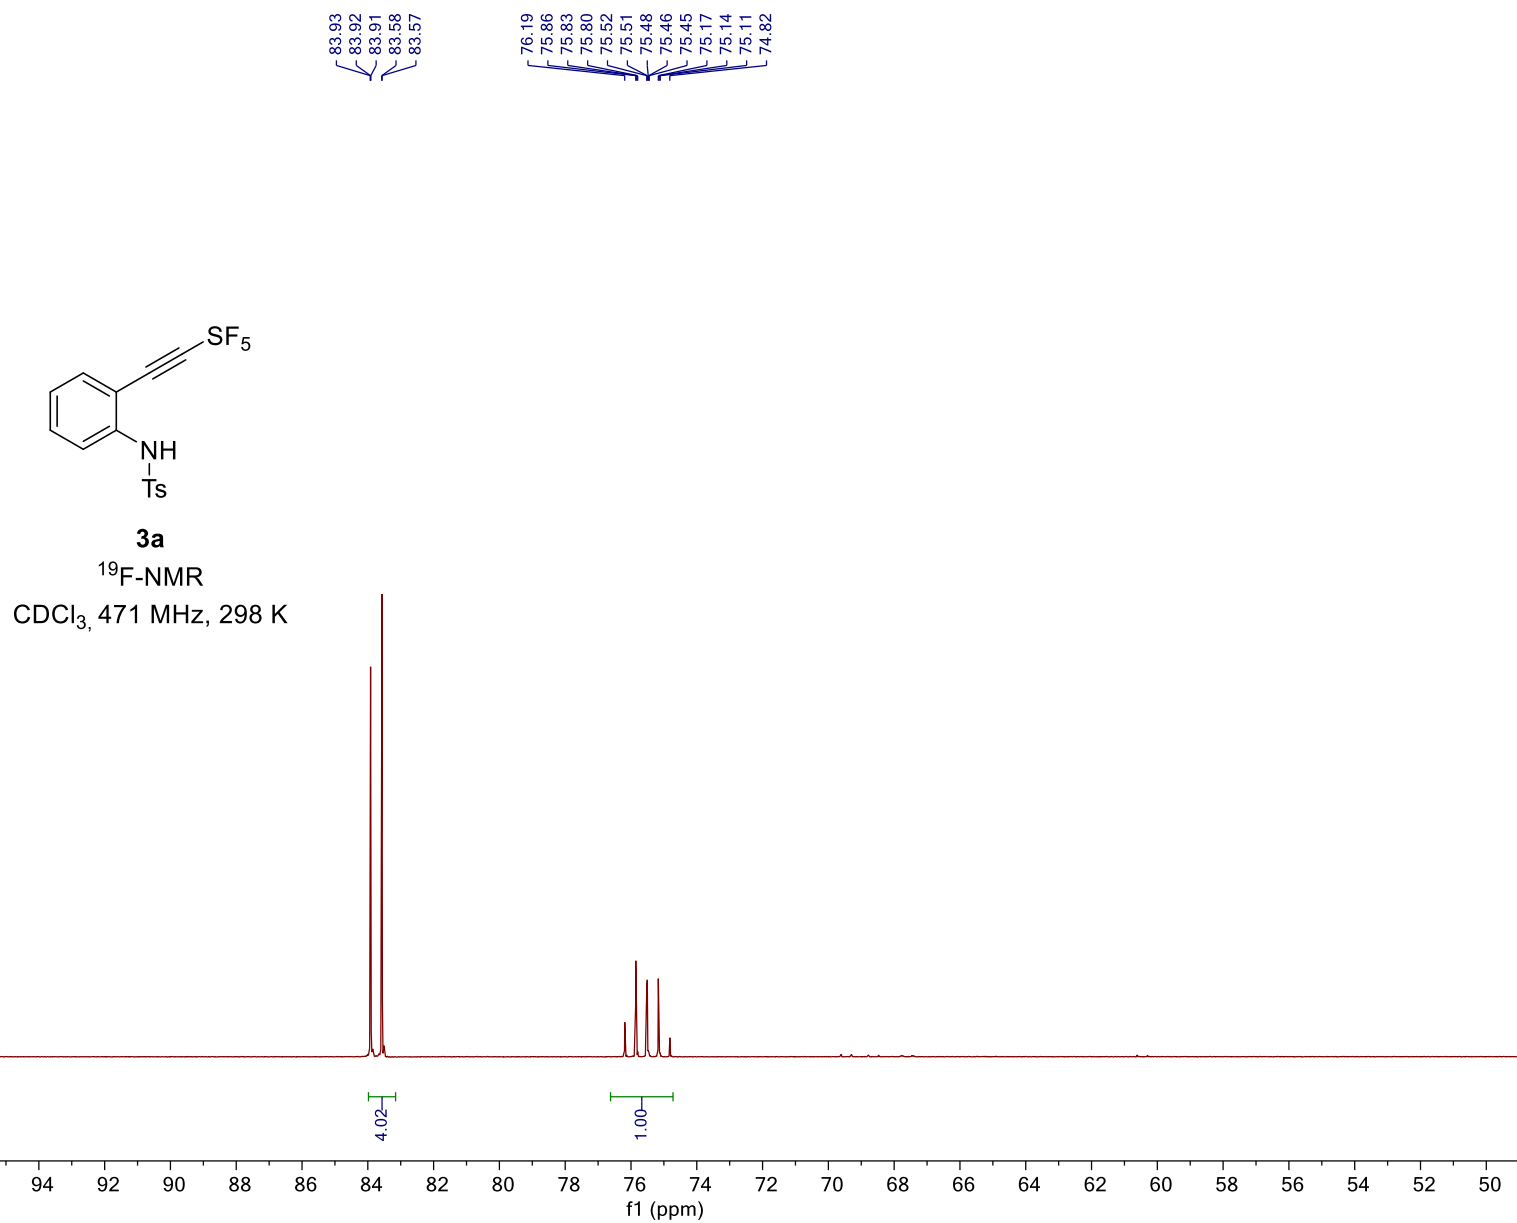

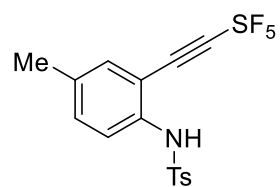**3b** $^1\text{H-NMR}$  $\text{CDCl}_3$ , 500 MHz, 298 K

7.60  
7.59  
7.57  
7.57  
7.56  
7.56  
7.30  
7.29  
7.28  
7.28  
7.26  
7.22  
7.21  
7.20  
6.62

2.38  
2.29

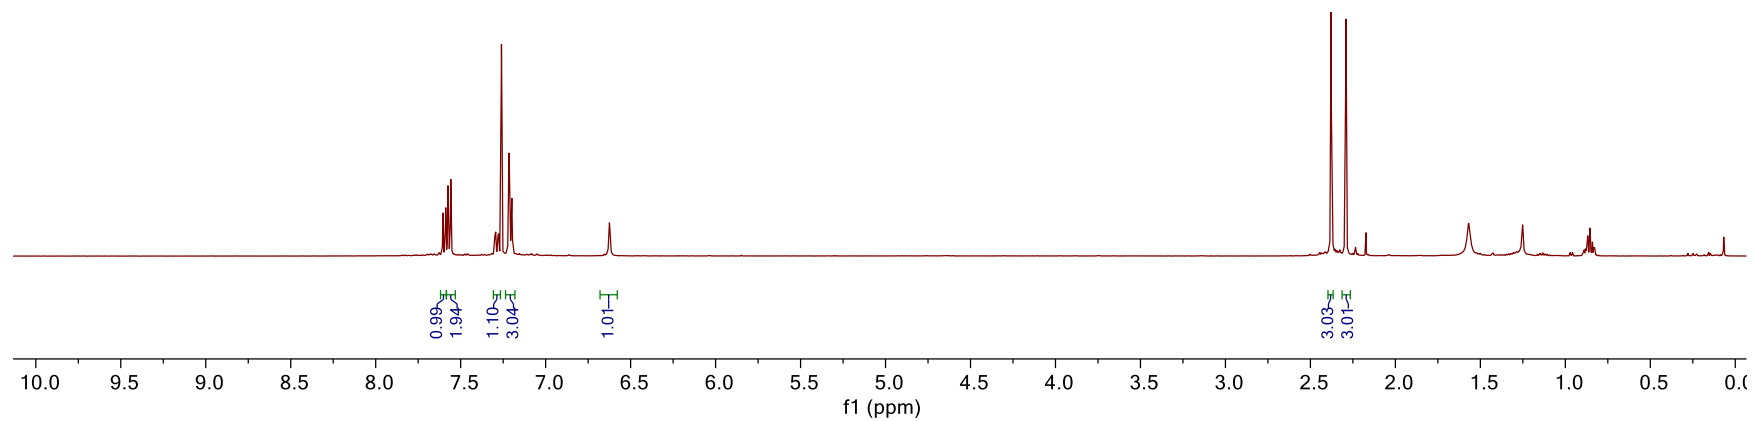

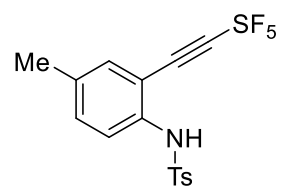**3b**

$^{13}\text{C}$ -NMR  
 $\text{CDCl}_3$ , 125 MHz, 298 K

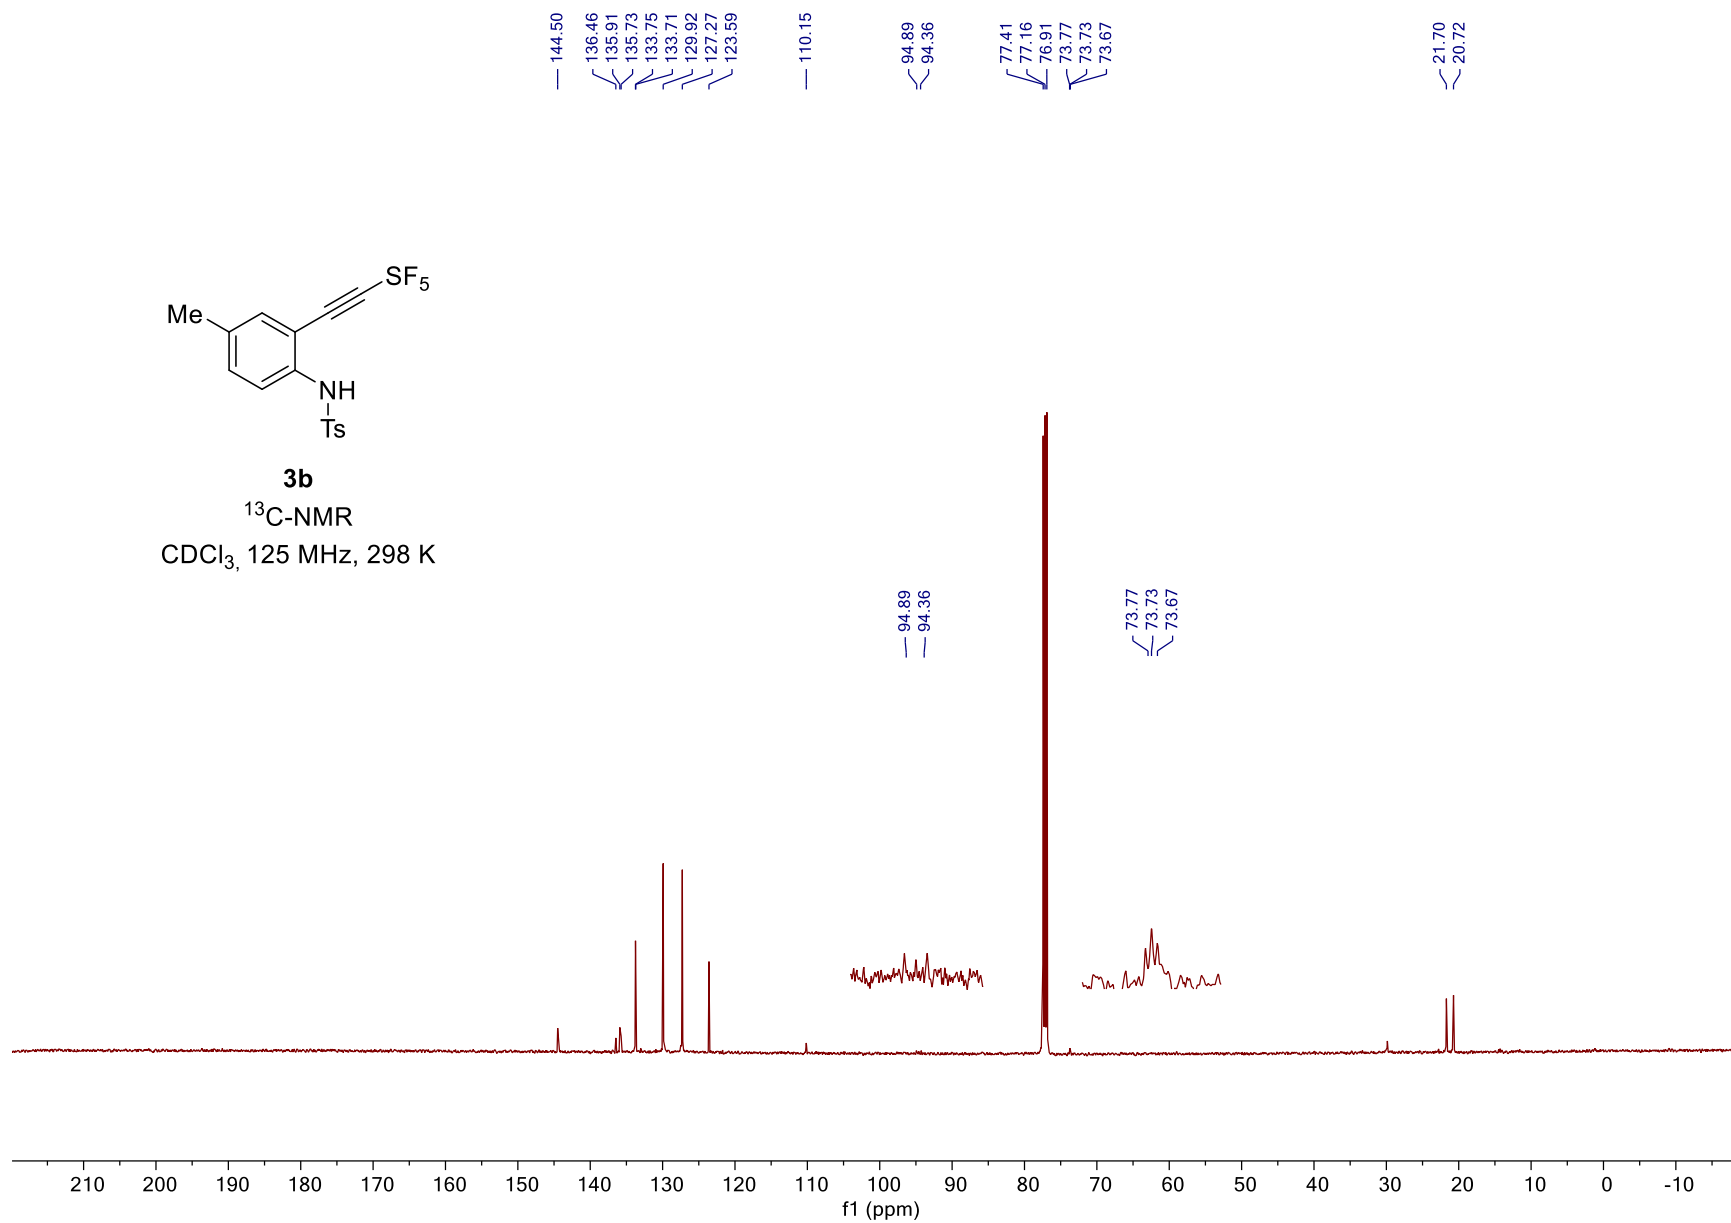

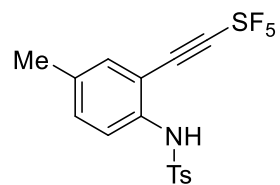**3b**

$^{19}\text{F}$ -NMR  
 $\text{CDCl}_3$ , 471 MHz, 298 K

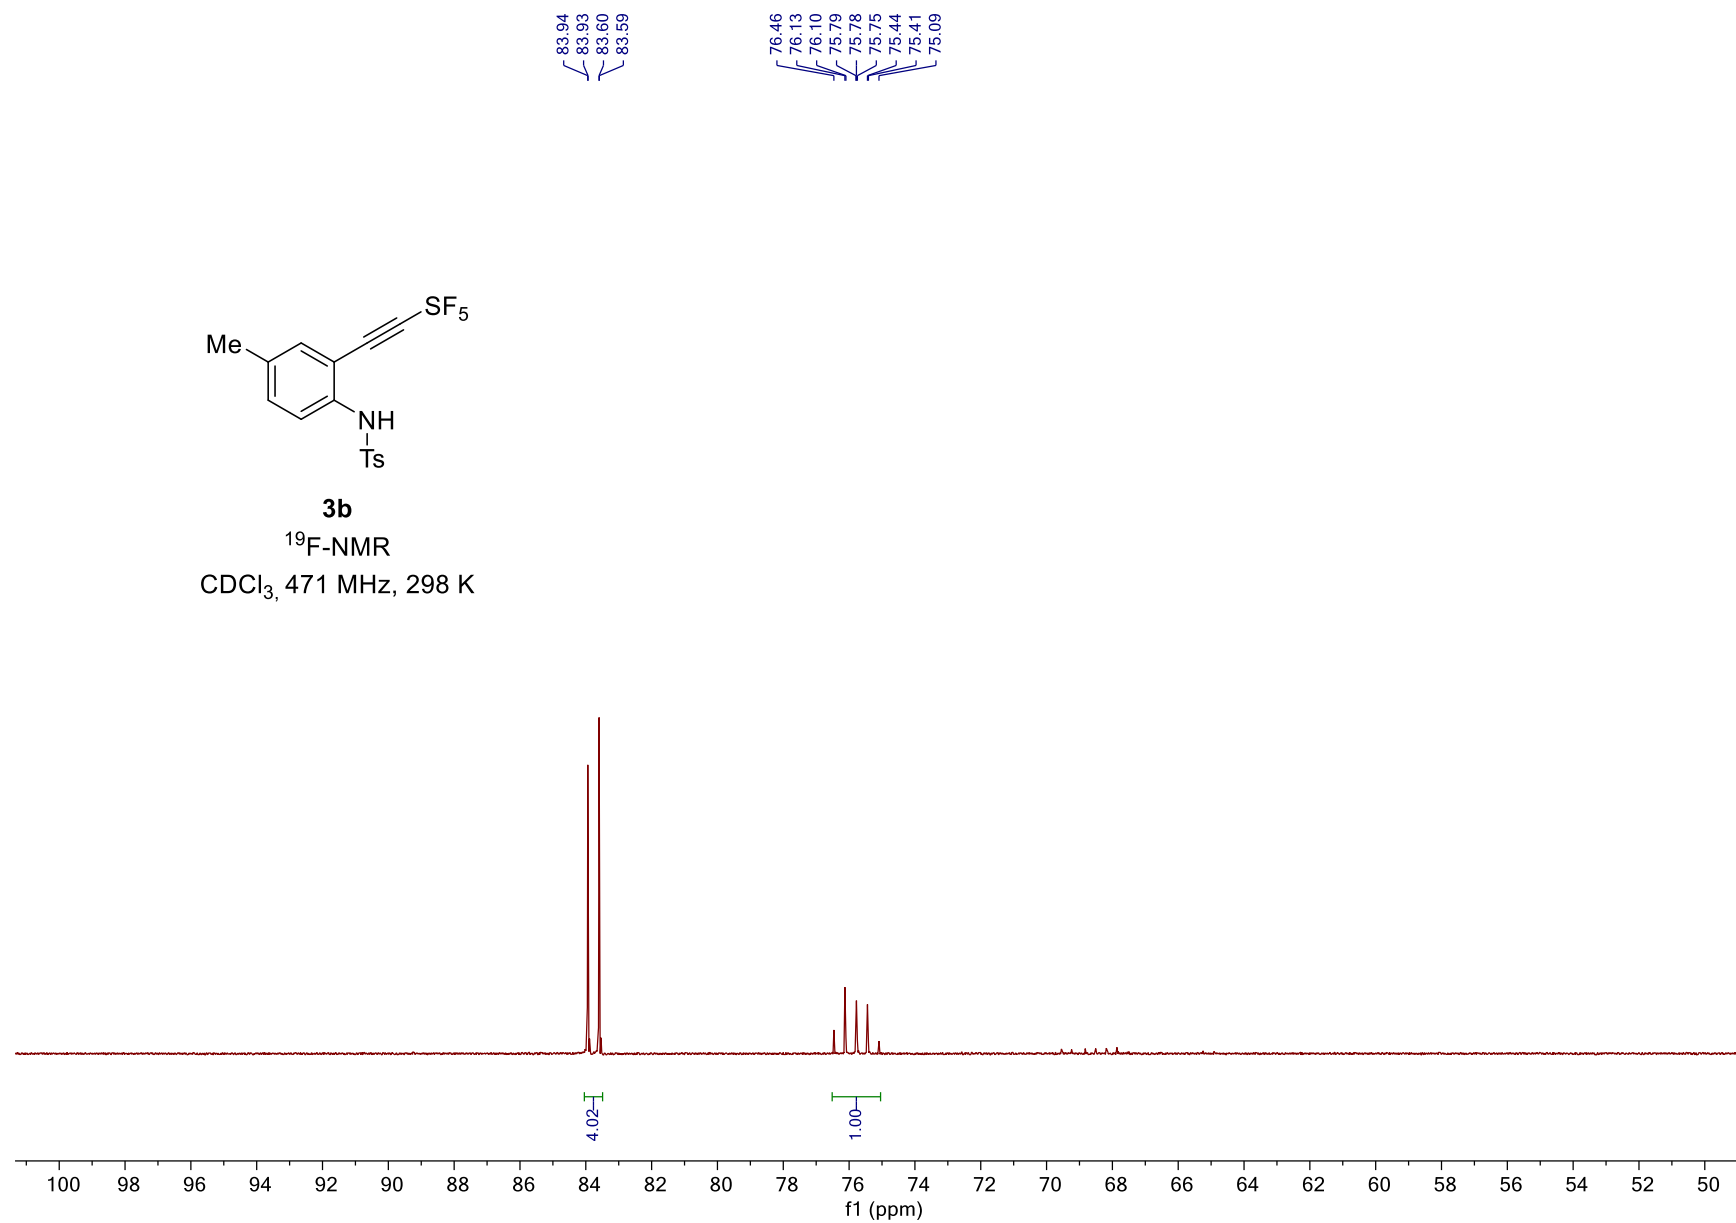

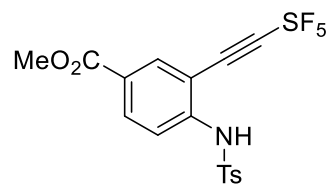**3f**<sup>1</sup>H-NMRCDCl<sub>3</sub>, 500 MHz, 298 K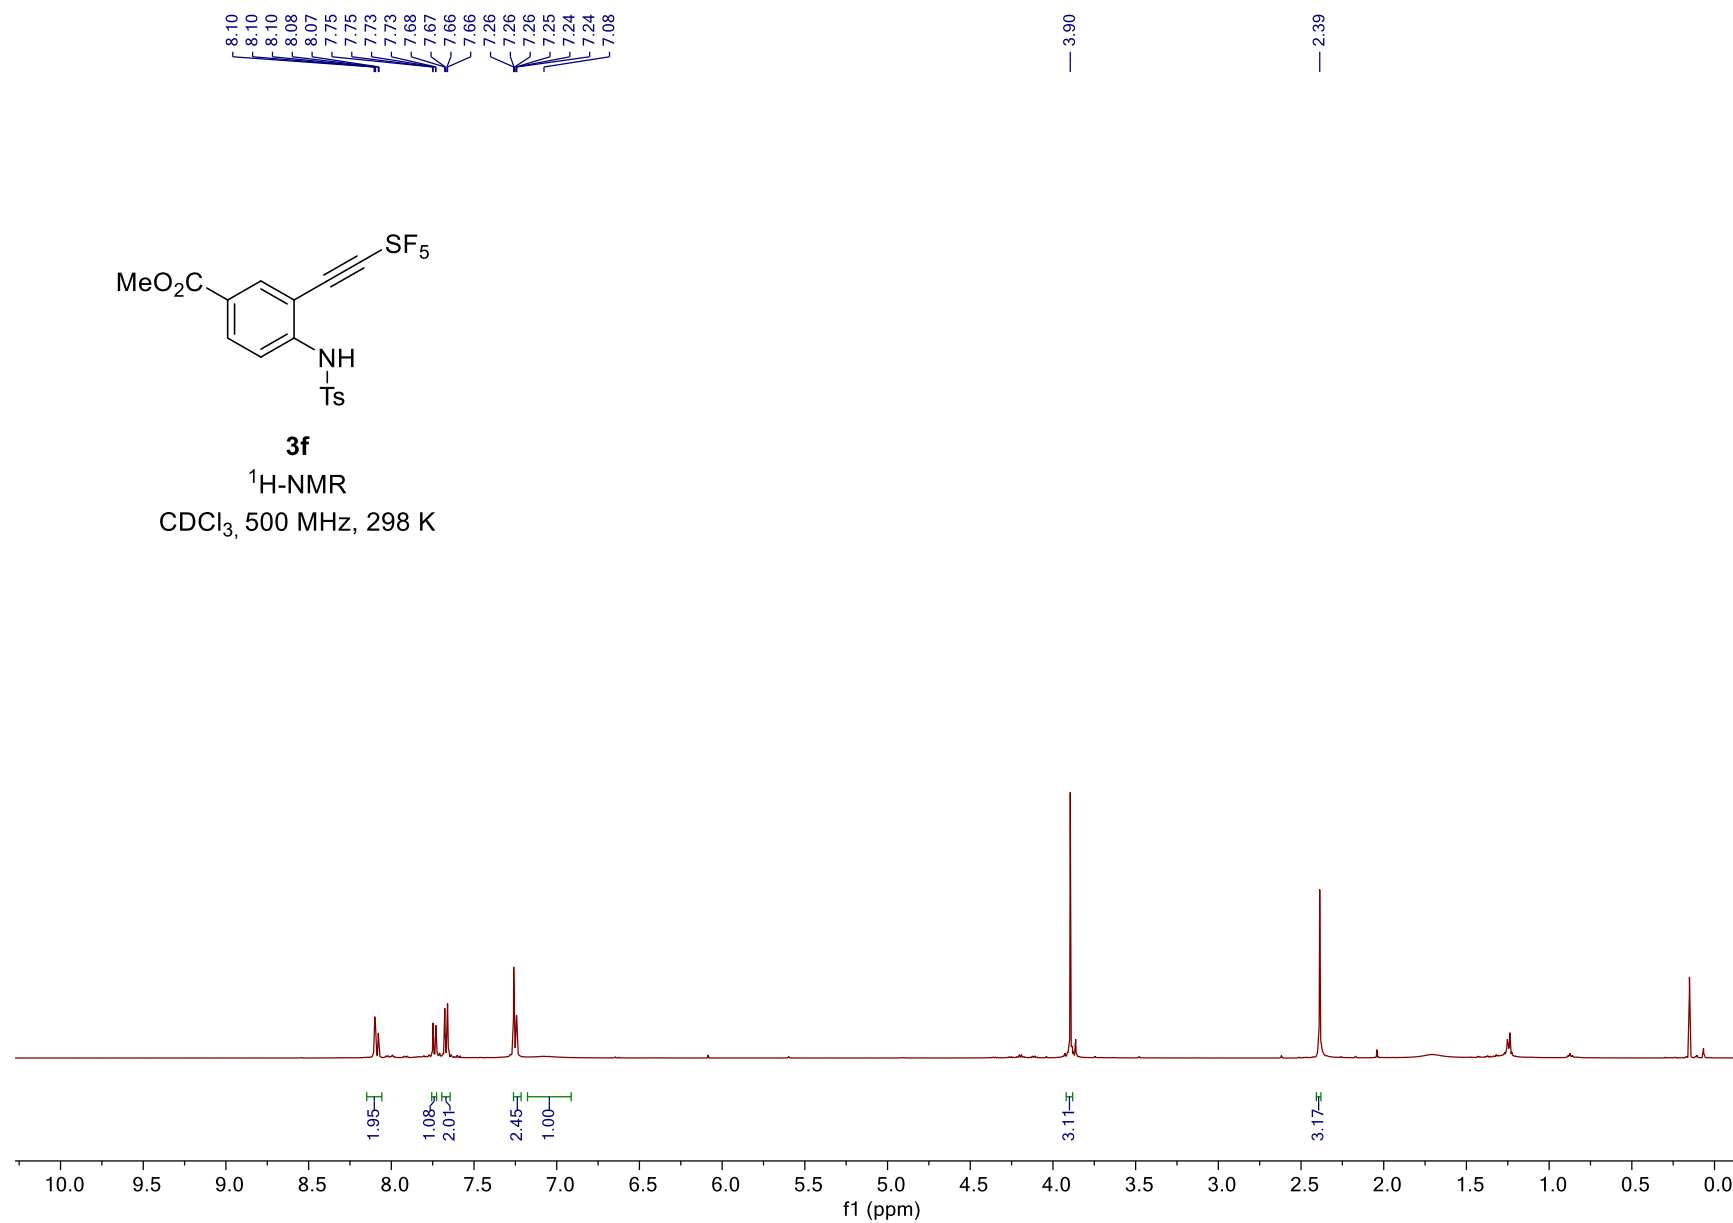

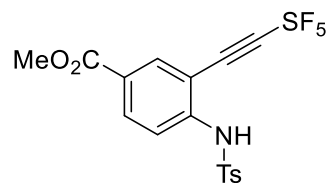**3f**<sup>13</sup>C-NMRCDCl<sub>3</sub>, 125 MHz, 298 K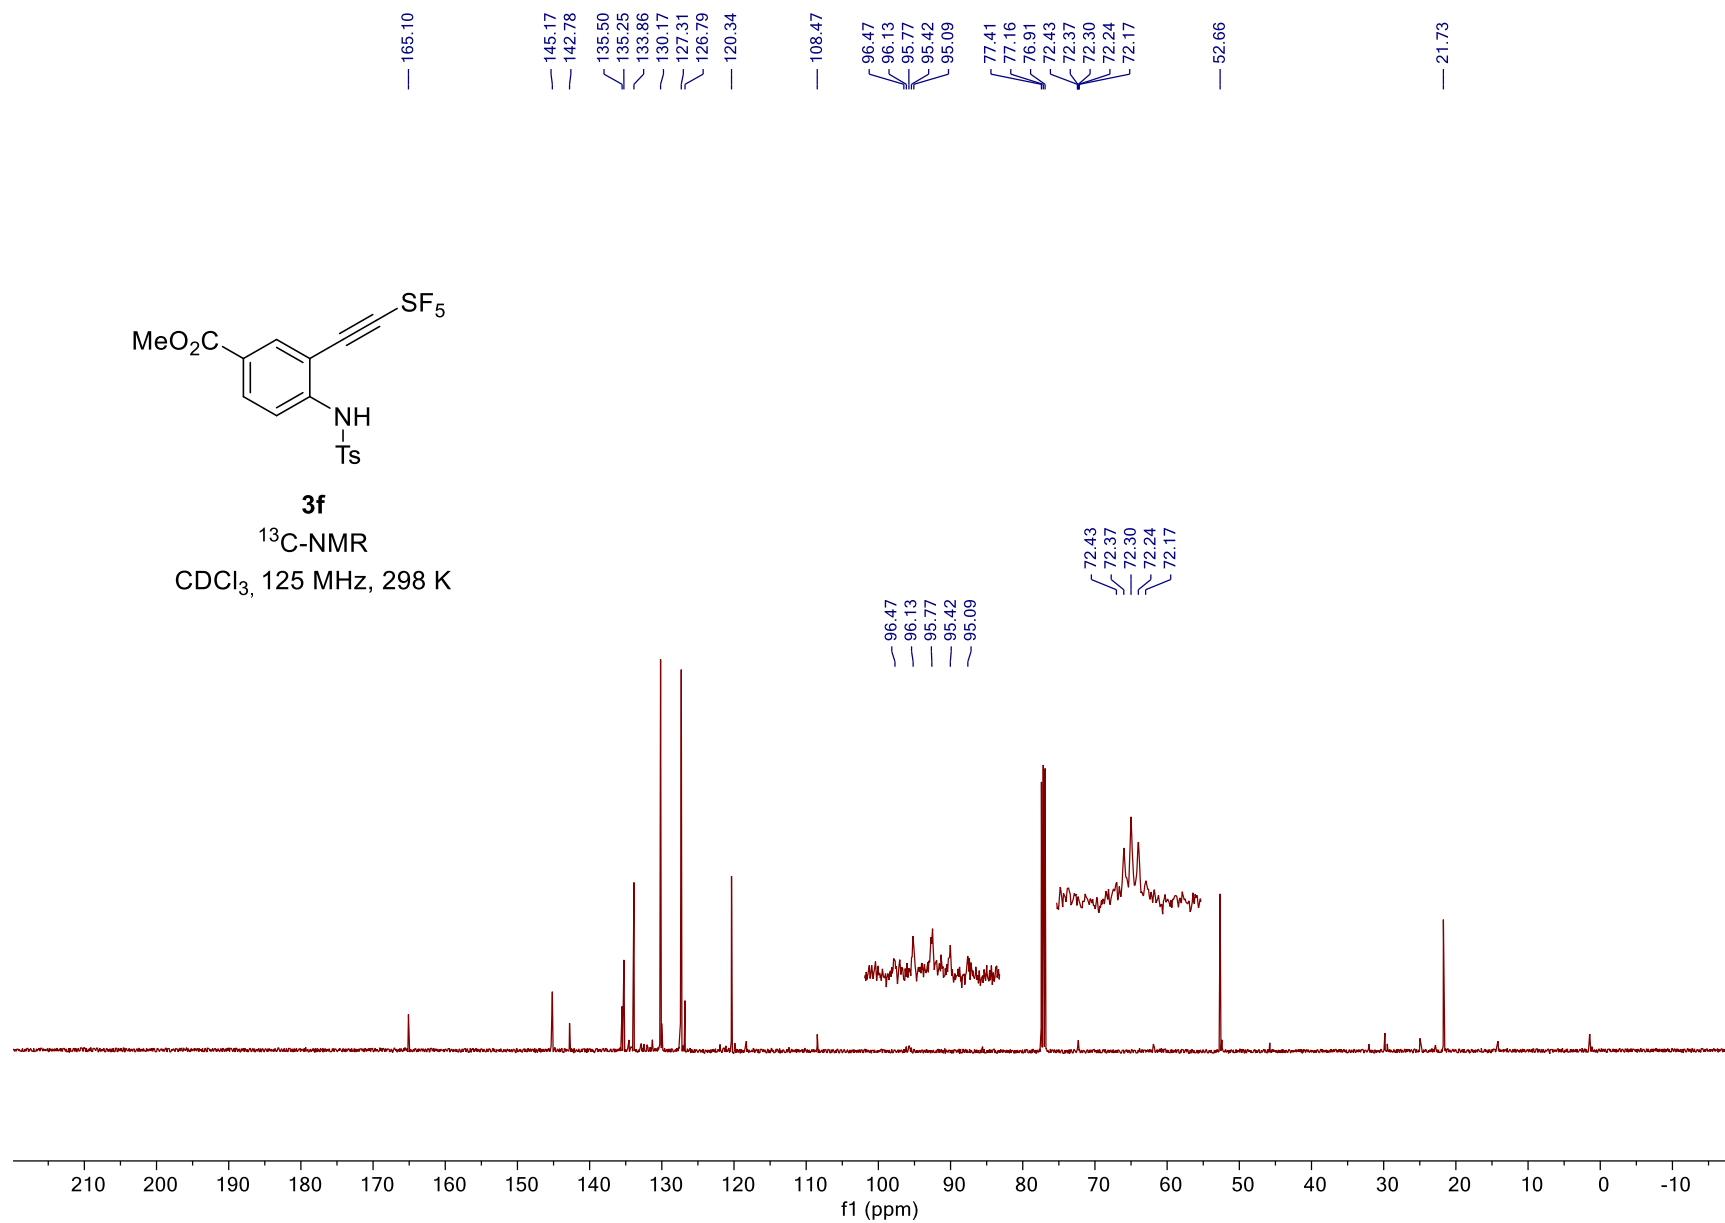





7.75  
7.73  
7.61  
7.60  
7.35  
7.35  
7.33  
7.33  
7.33  
7.27  
7.27  
7.26  
7.25  
7.24  
7.24  
6.84

2.40

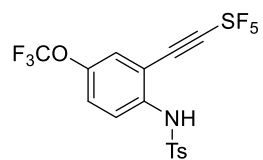

**3g**

<sup>1</sup>H-NMR

CDCl<sub>3</sub>, 500 MHz, 298 K

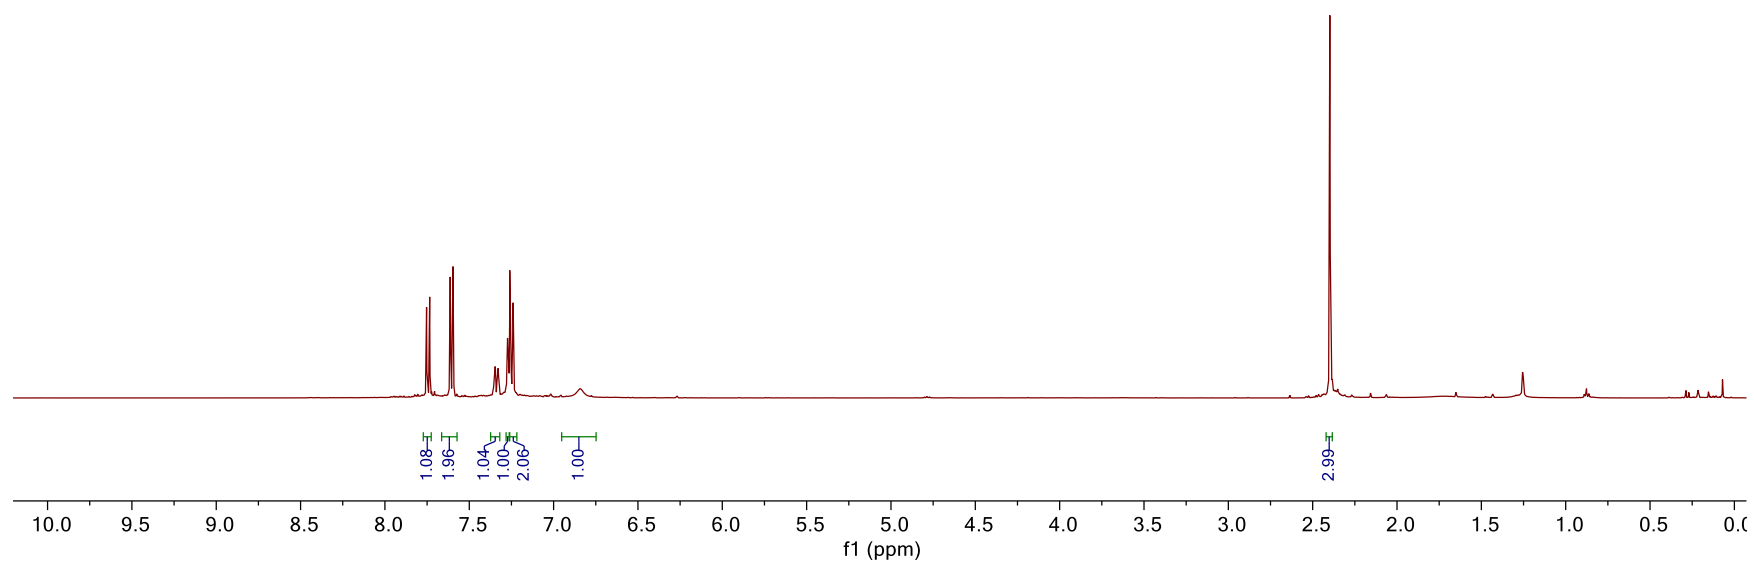

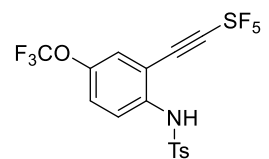

**3g**  
<sup>13</sup>C-NMR  
CDCl<sub>3</sub>, 125 MHz, 298 K

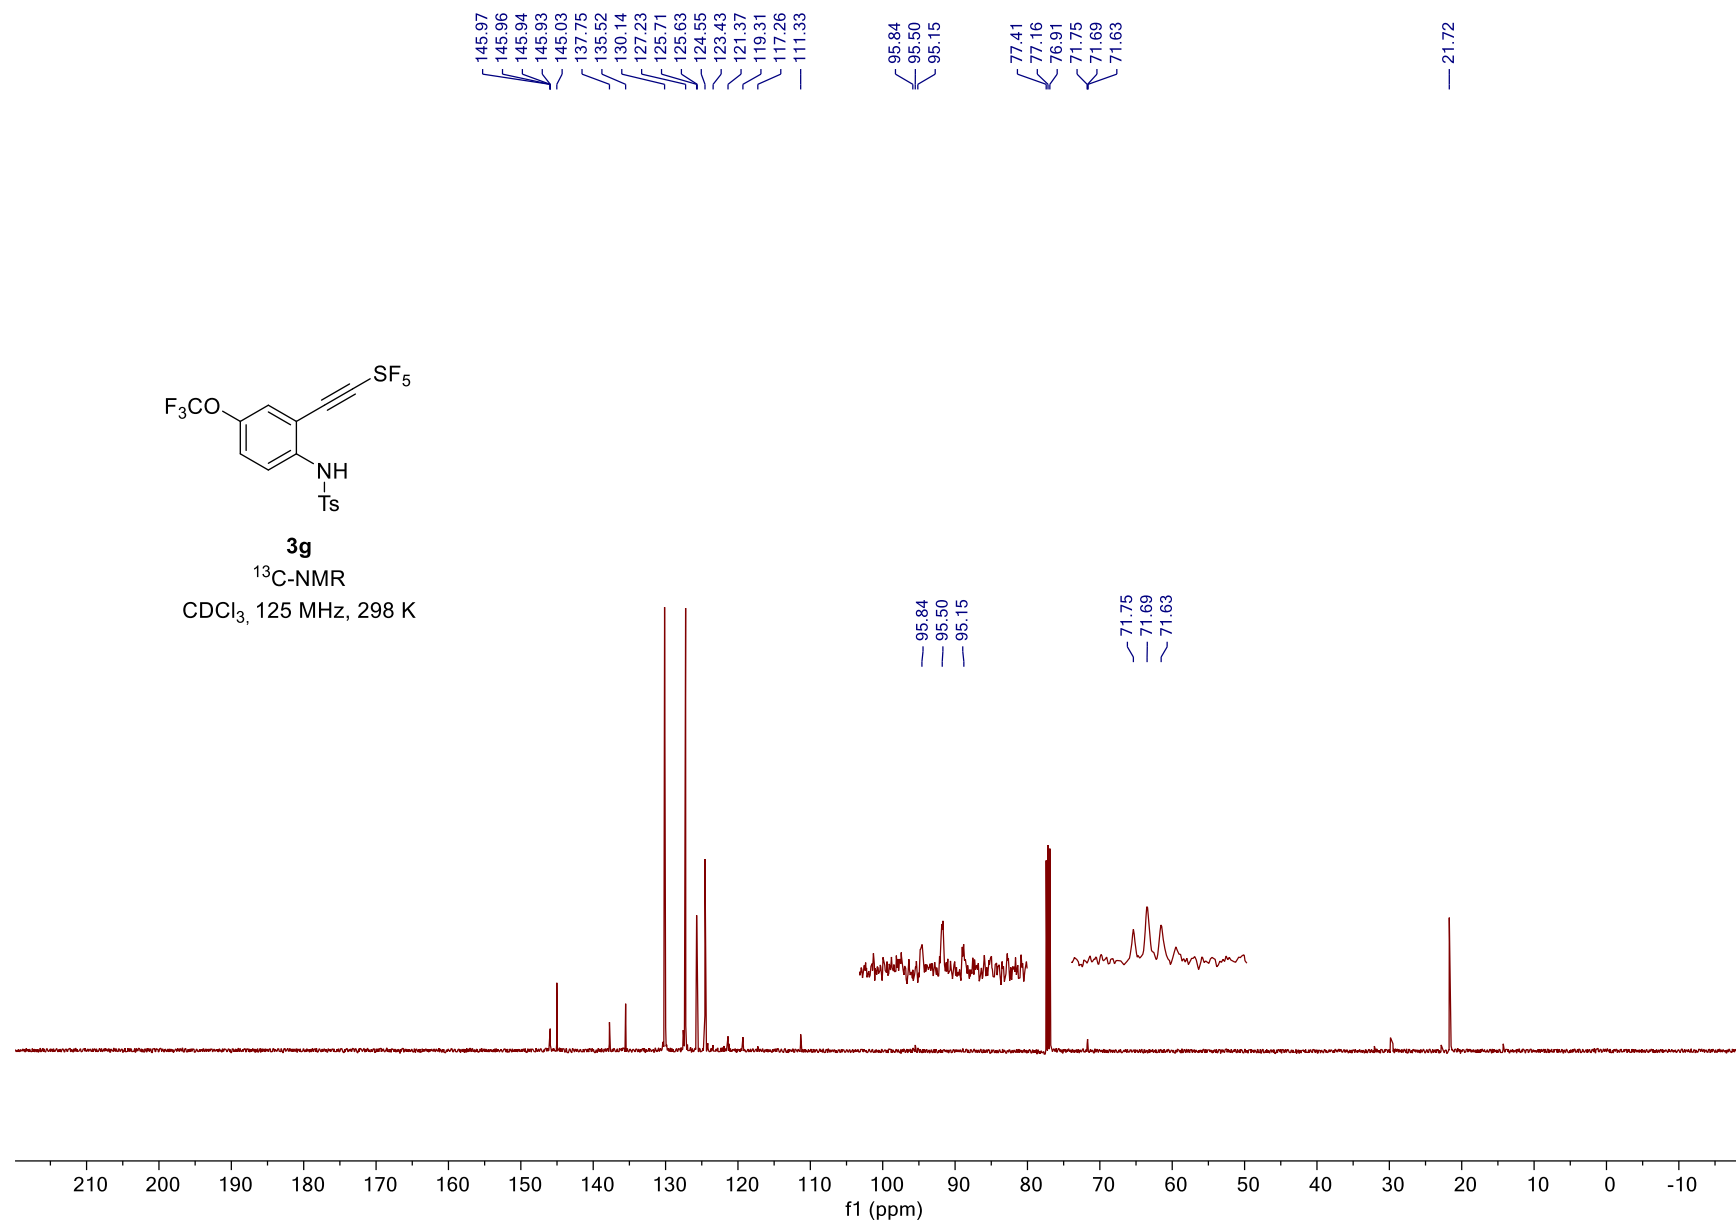

83.58  
83.57  
83.24  
83.23  
75.02  
74.69  
74.66  
74.35  
74.34  
74.31  
74.00  
73.97  
73.65

-58.22

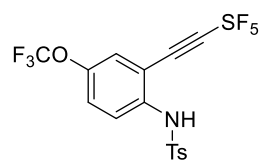**3g**<sup>19</sup>F-NMRCDCl<sub>3</sub>, 471 MHz, 298 K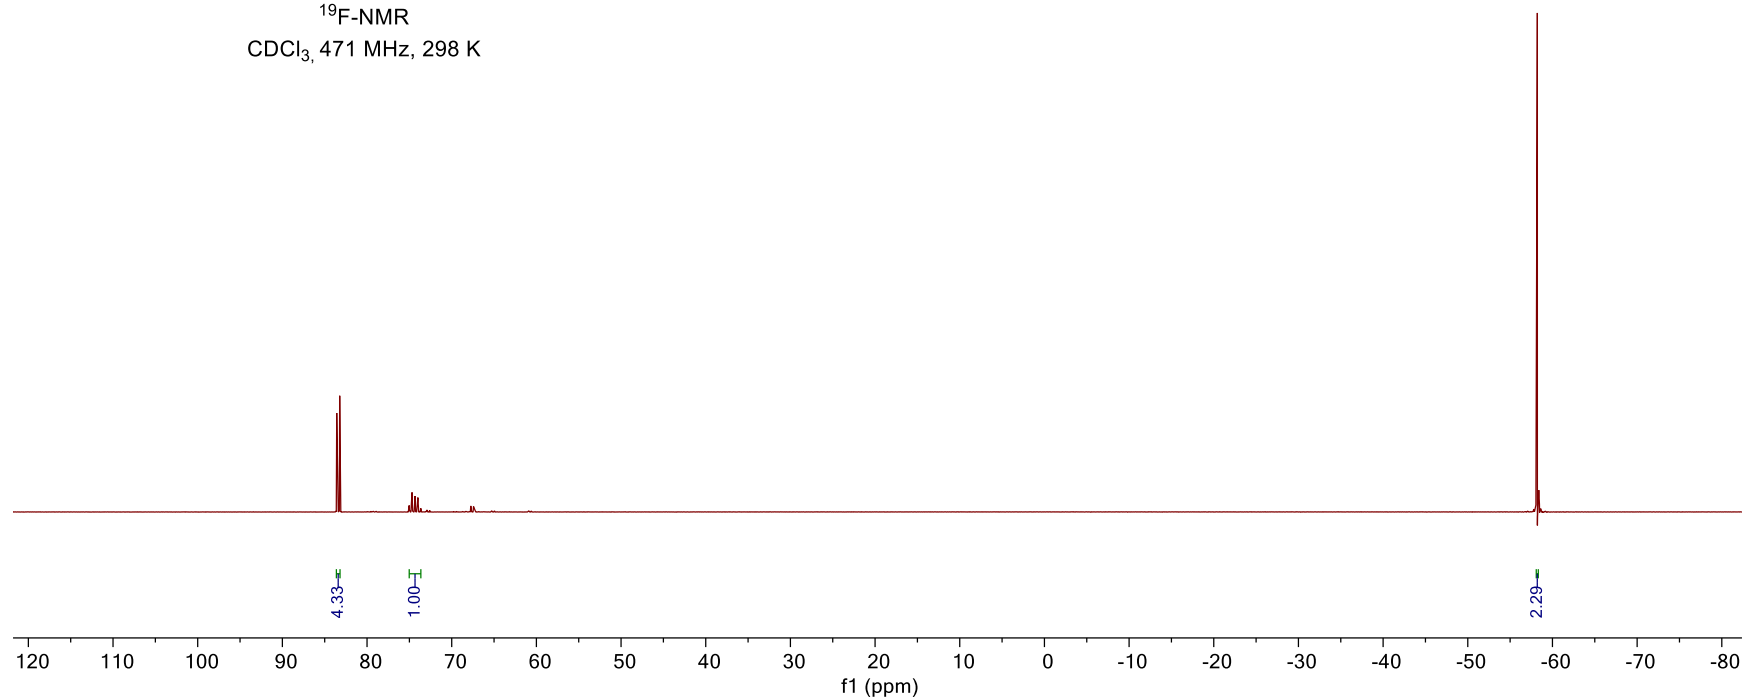

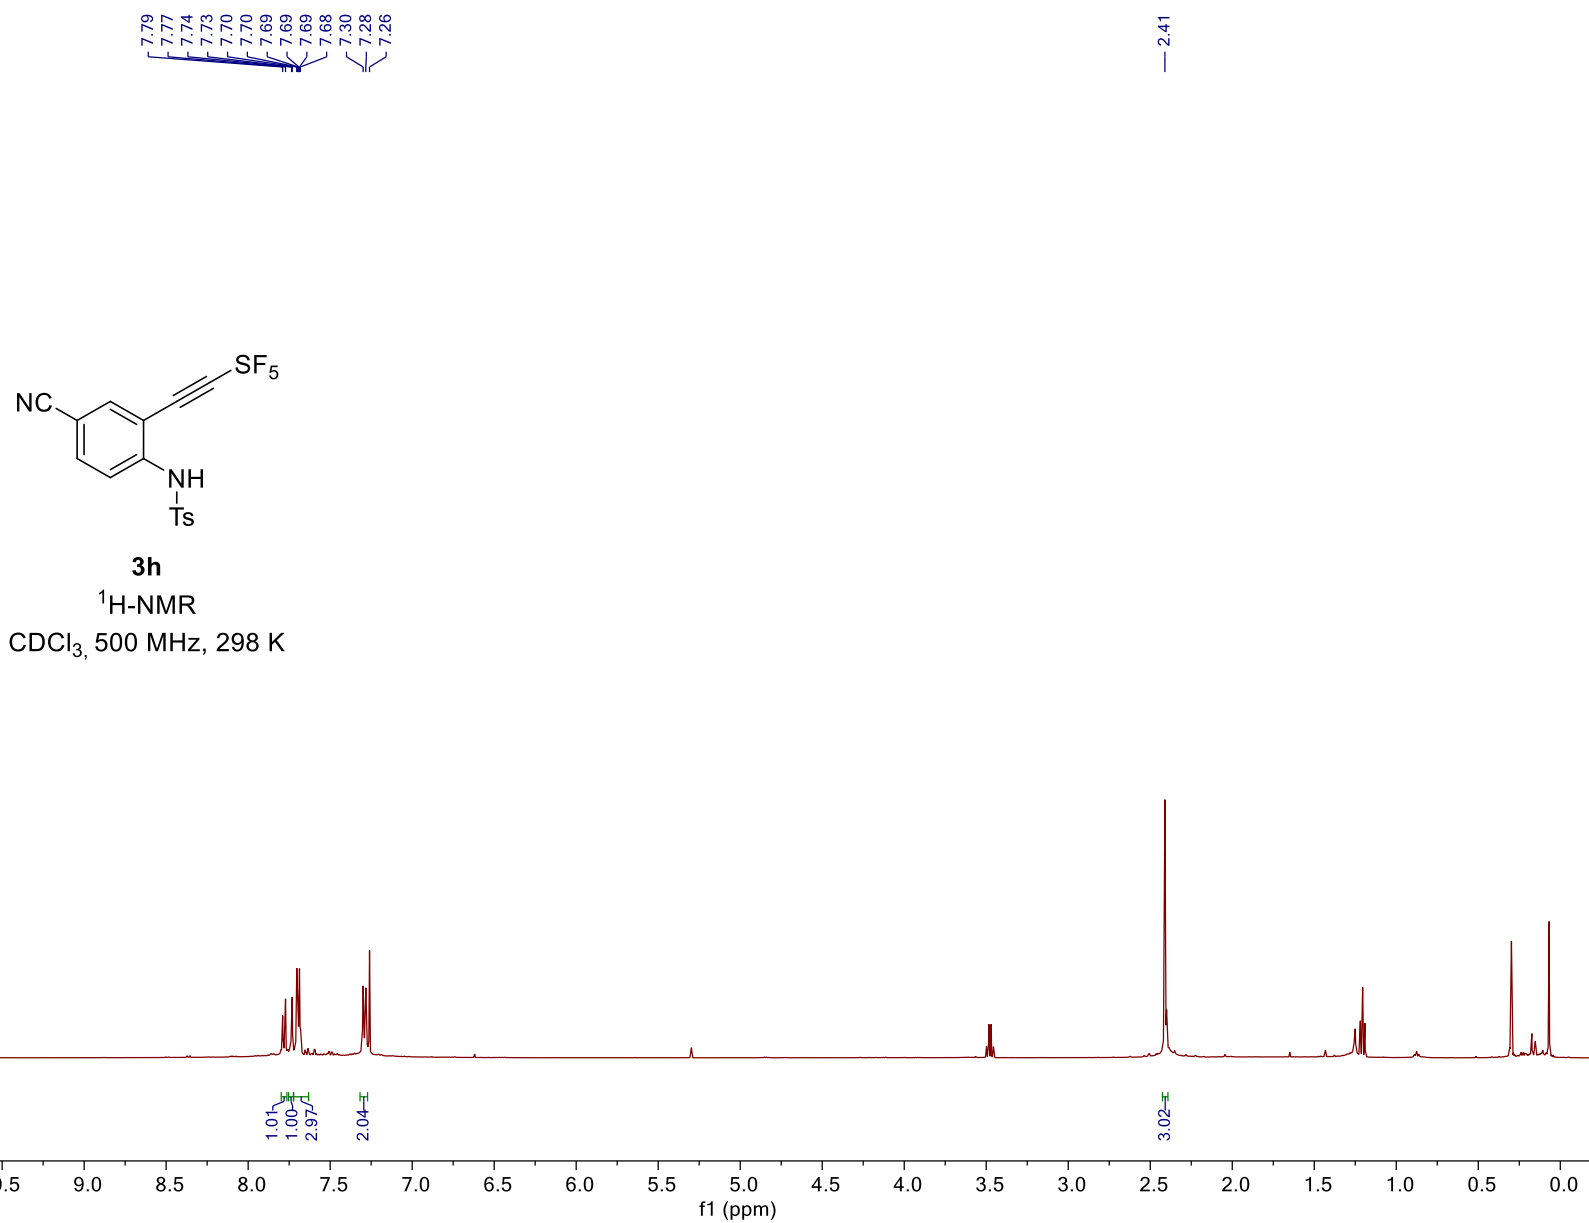

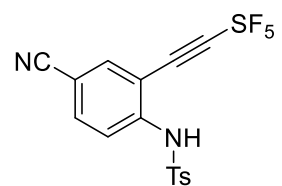**3h** $^{13}\text{C}$ -NMR $\text{CDCl}_3$ , 125 MHz, 298 K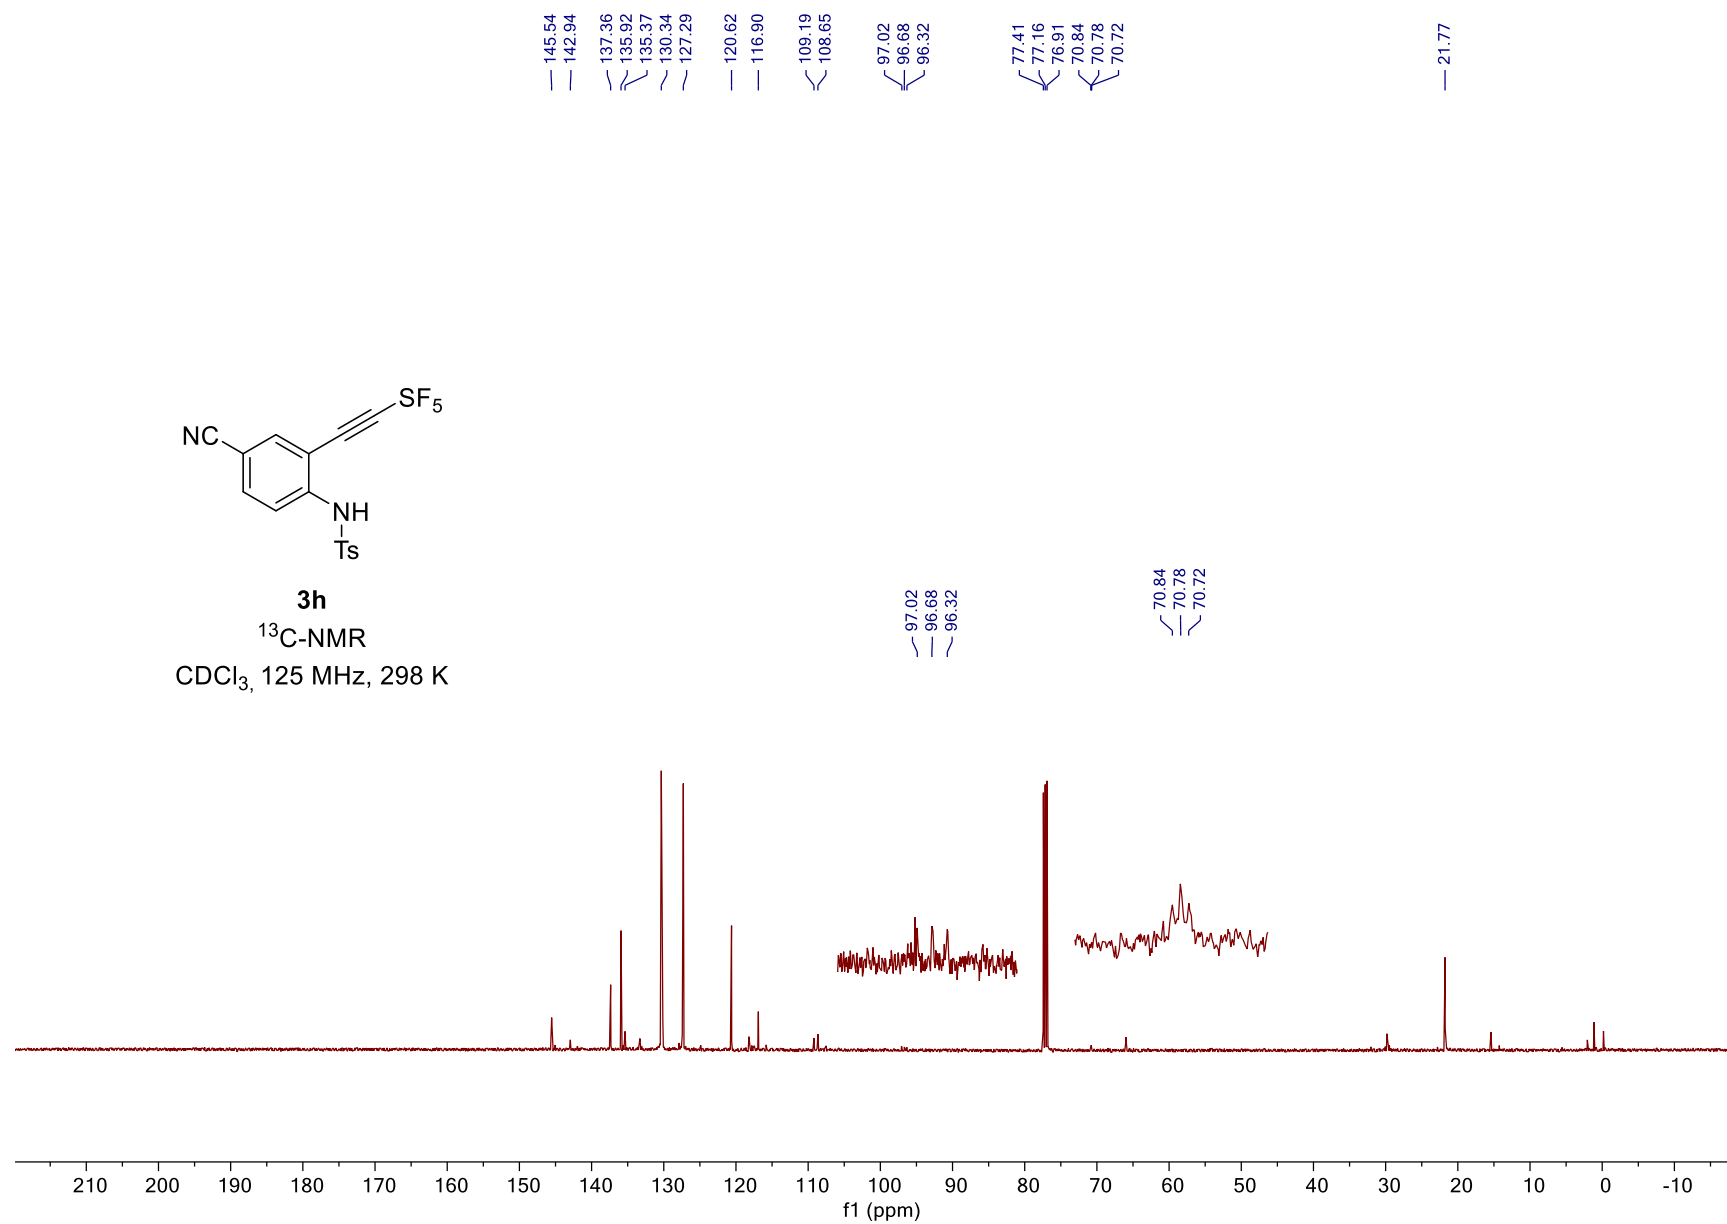

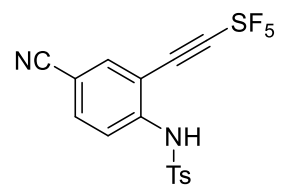**3h**<sup>19</sup>F-NMRCDCl<sub>3</sub>, 471 MHz, 298 K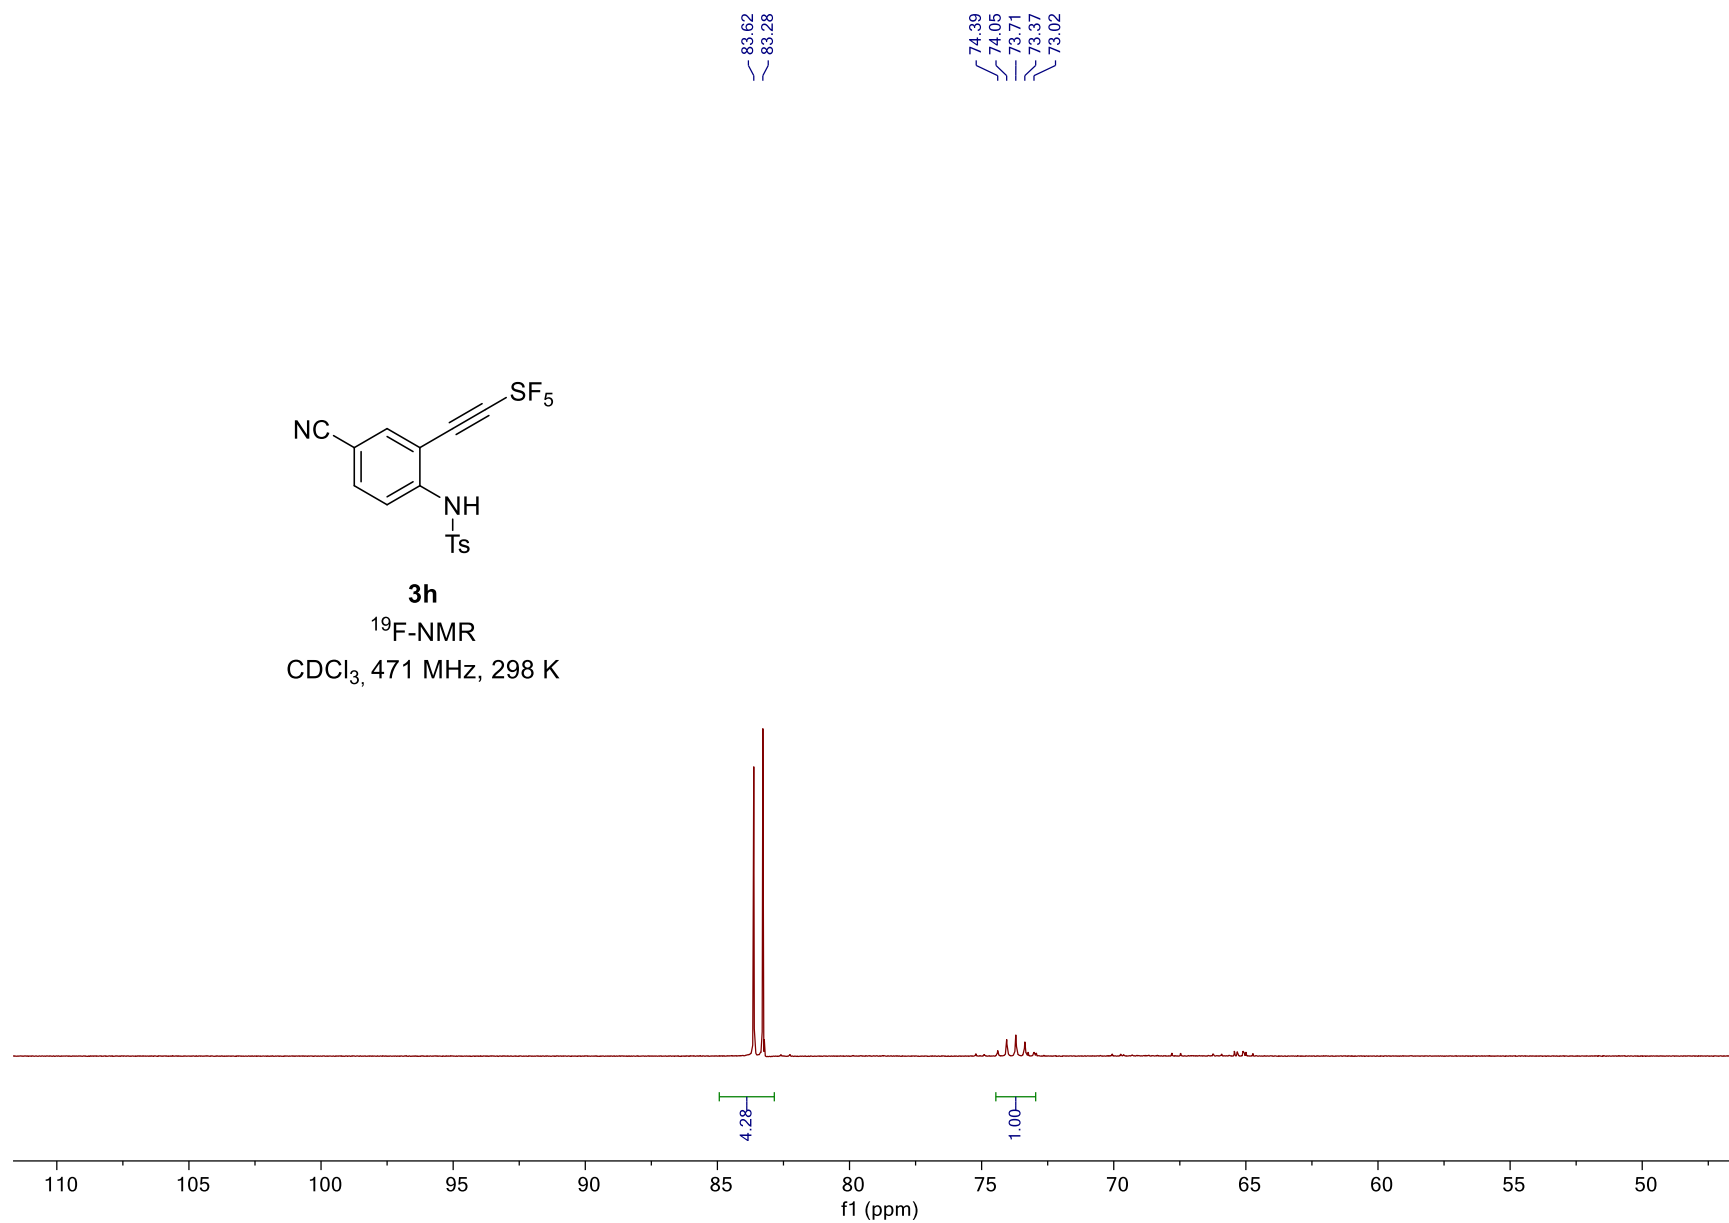

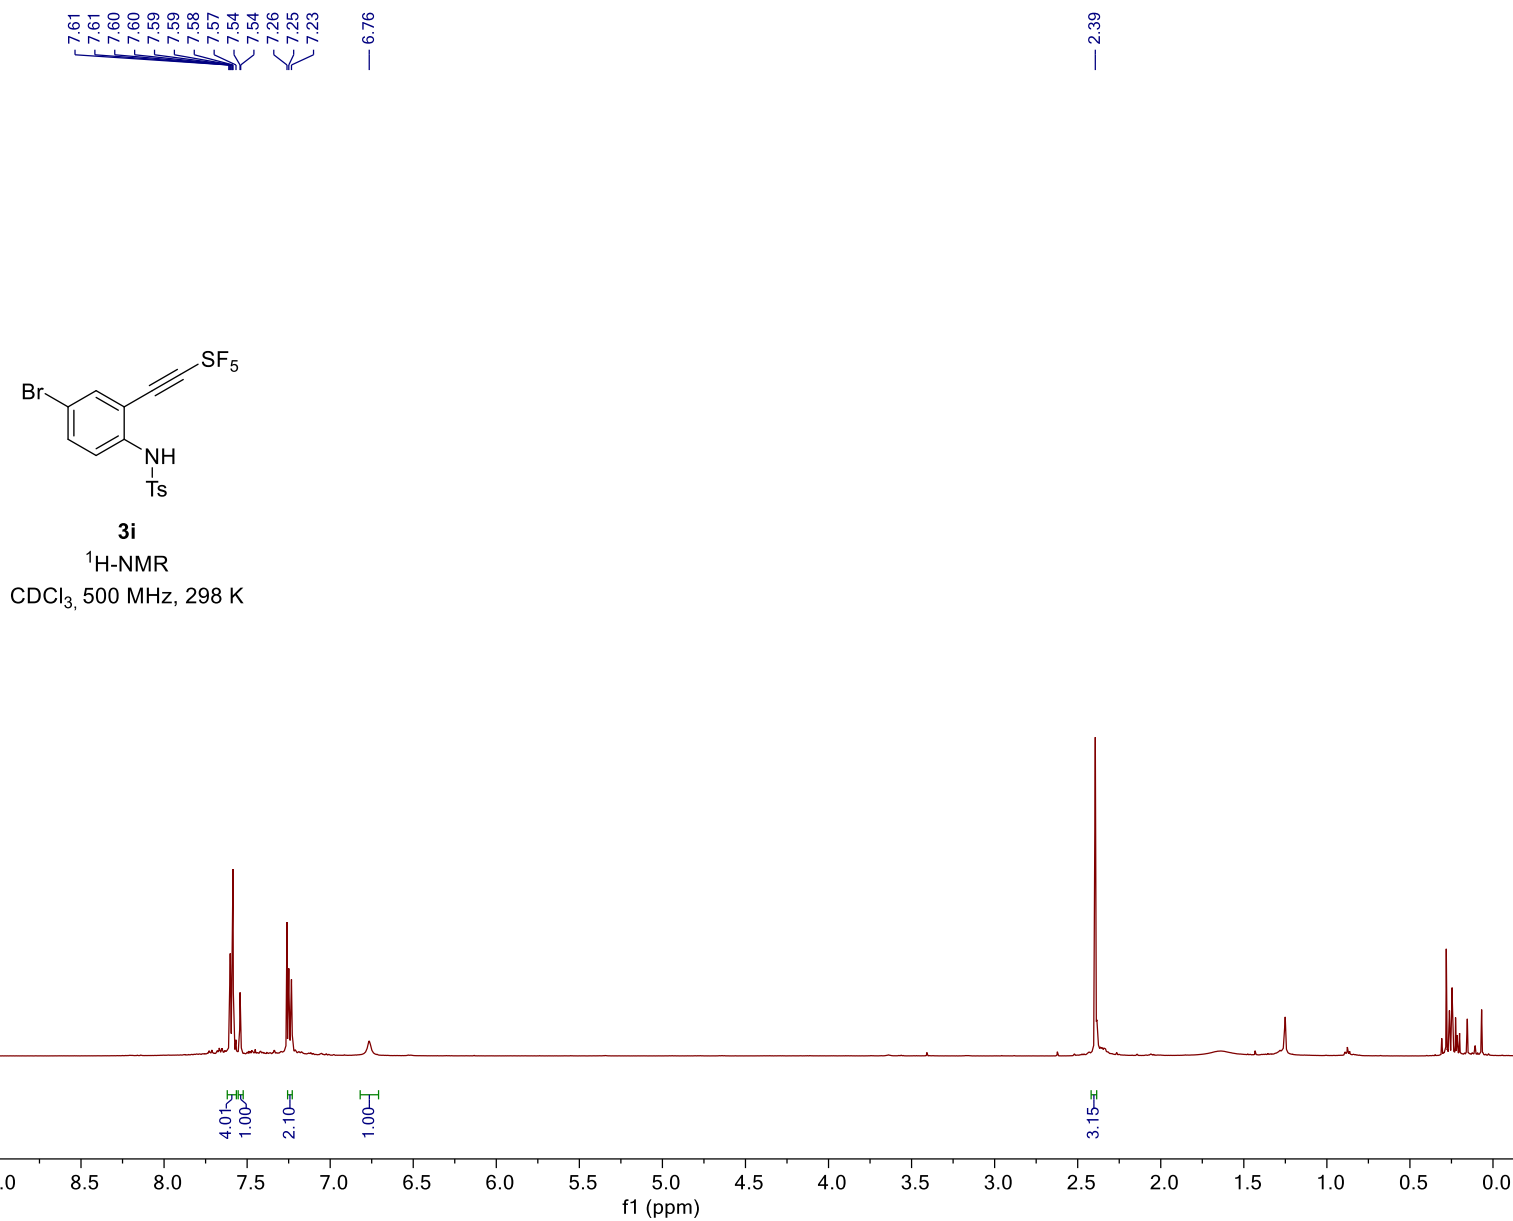

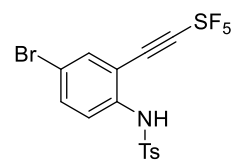**3i**<sup>13</sup>C-NMRCDCl<sub>3</sub>, 125 MHz, 298 K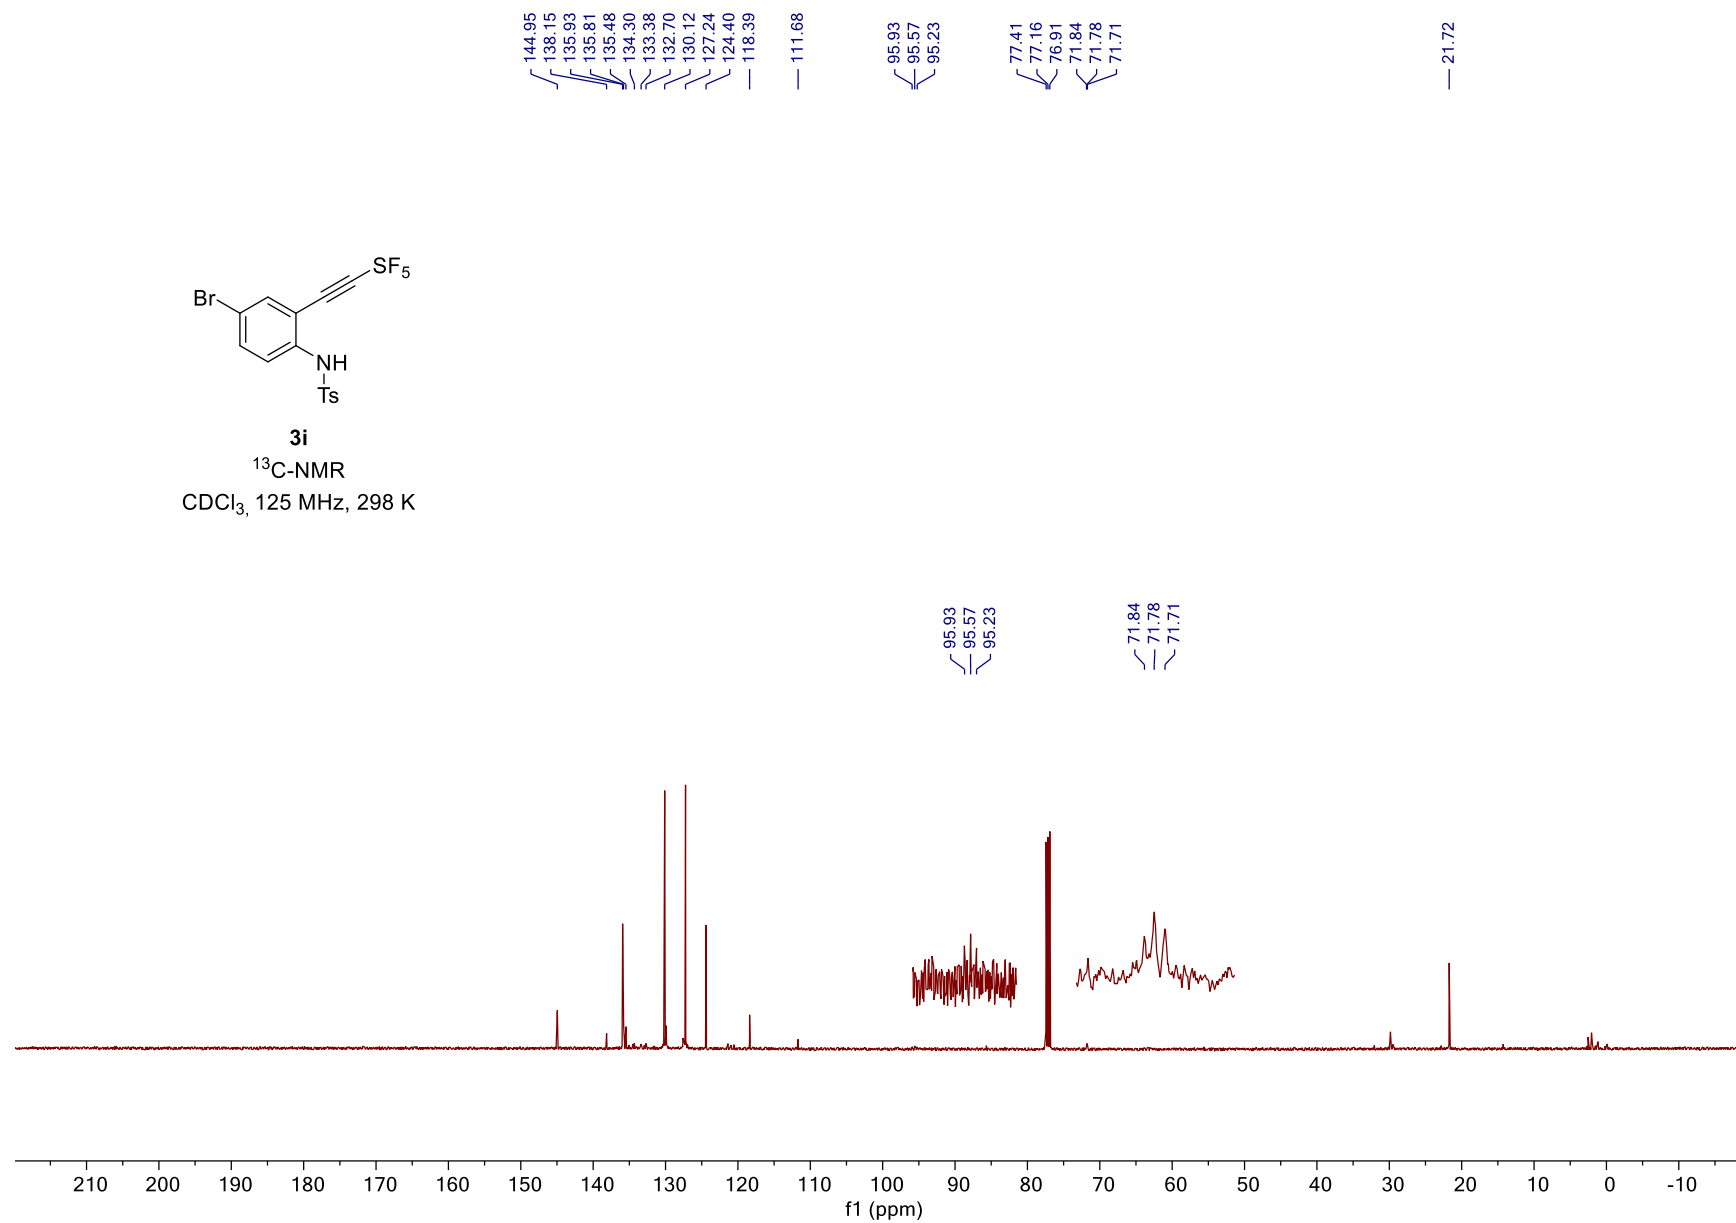



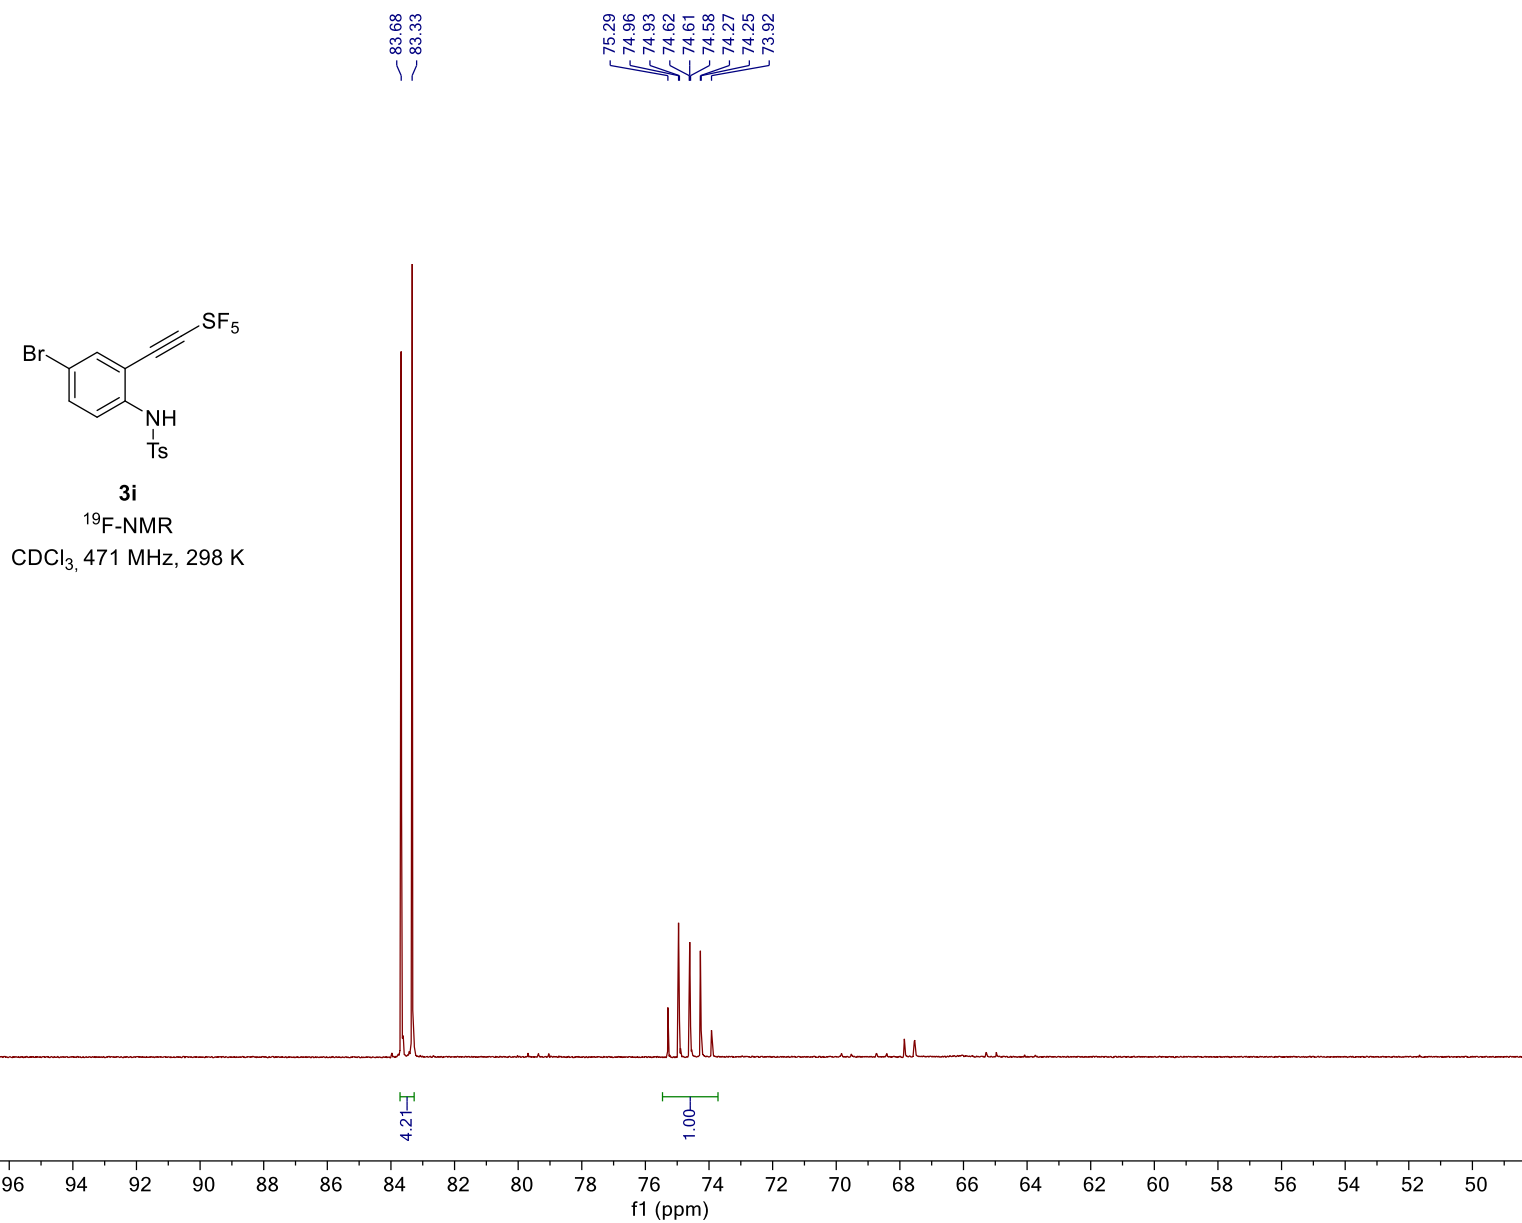

7.67  
7.67  
7.66  
7.65  
7.47  
7.46  
7.45  
7.44  
7.42  
7.41  
7.41  
7.39  
7.27  
7.26  
7.25  
6.87  
6.86  
6.85  
6.85  
6.85  
6.84  
6.83  
6.83

— 2.40

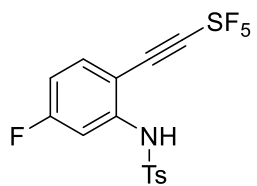

**3k**

<sup>1</sup>H-NMR

CDCl<sub>3</sub>, 500 MHz, 298 K

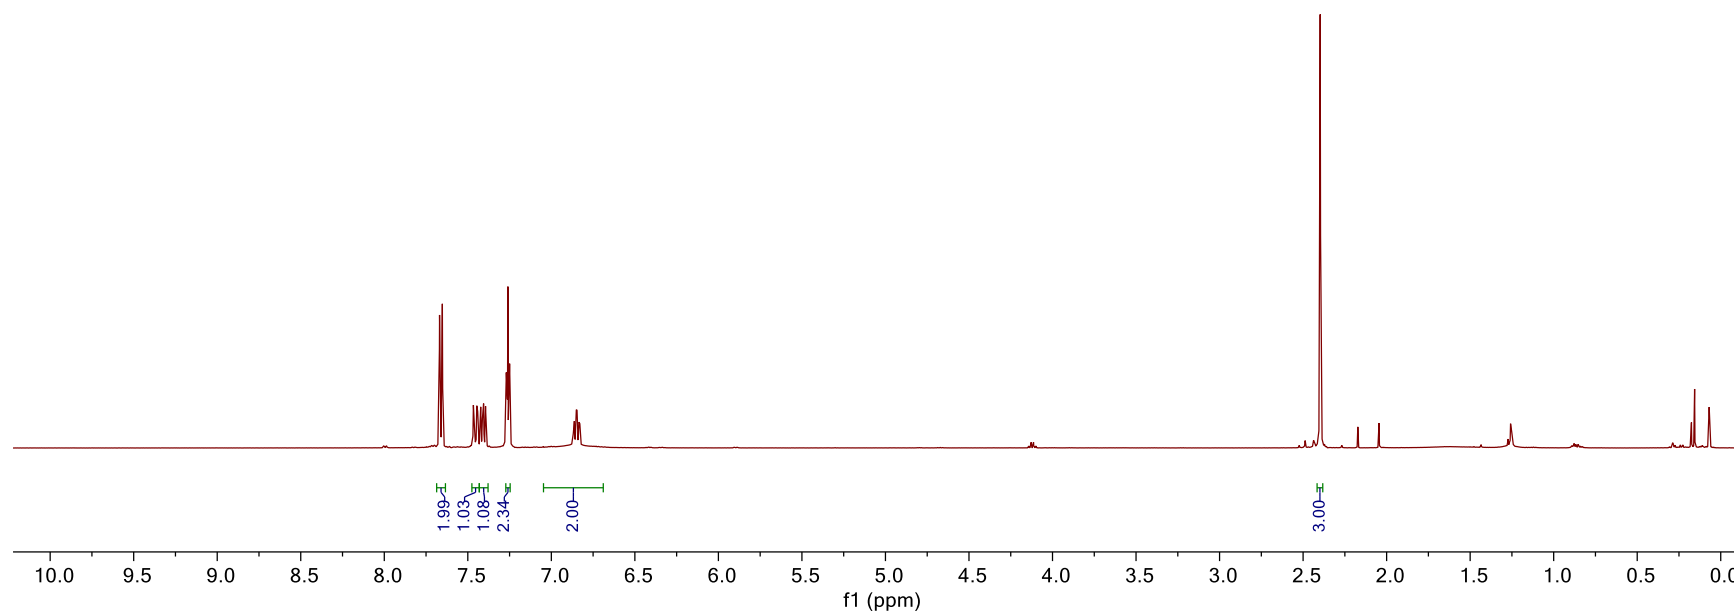

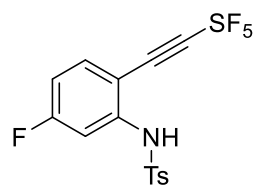**3k** $^{13}\text{C}$ -NMR $\text{CDCl}_3$ , 125 MHz, 298 K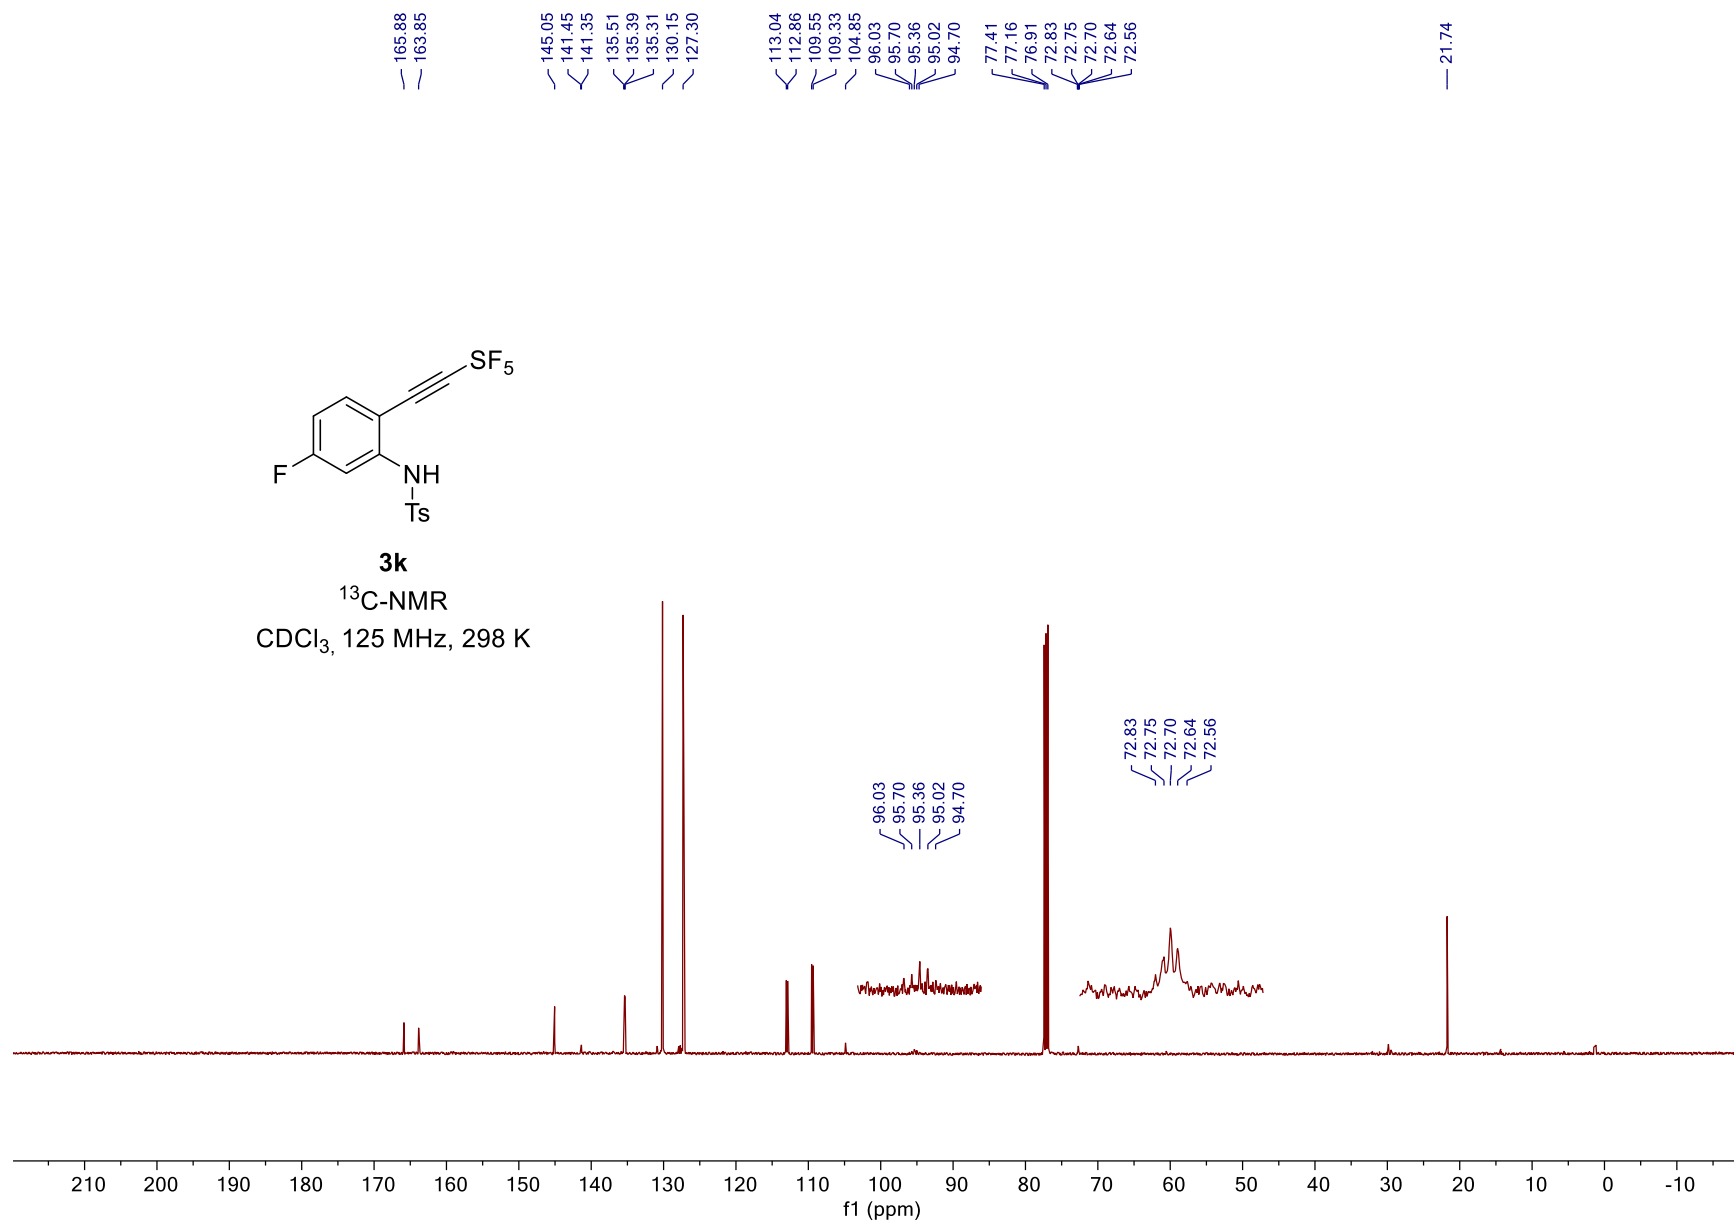

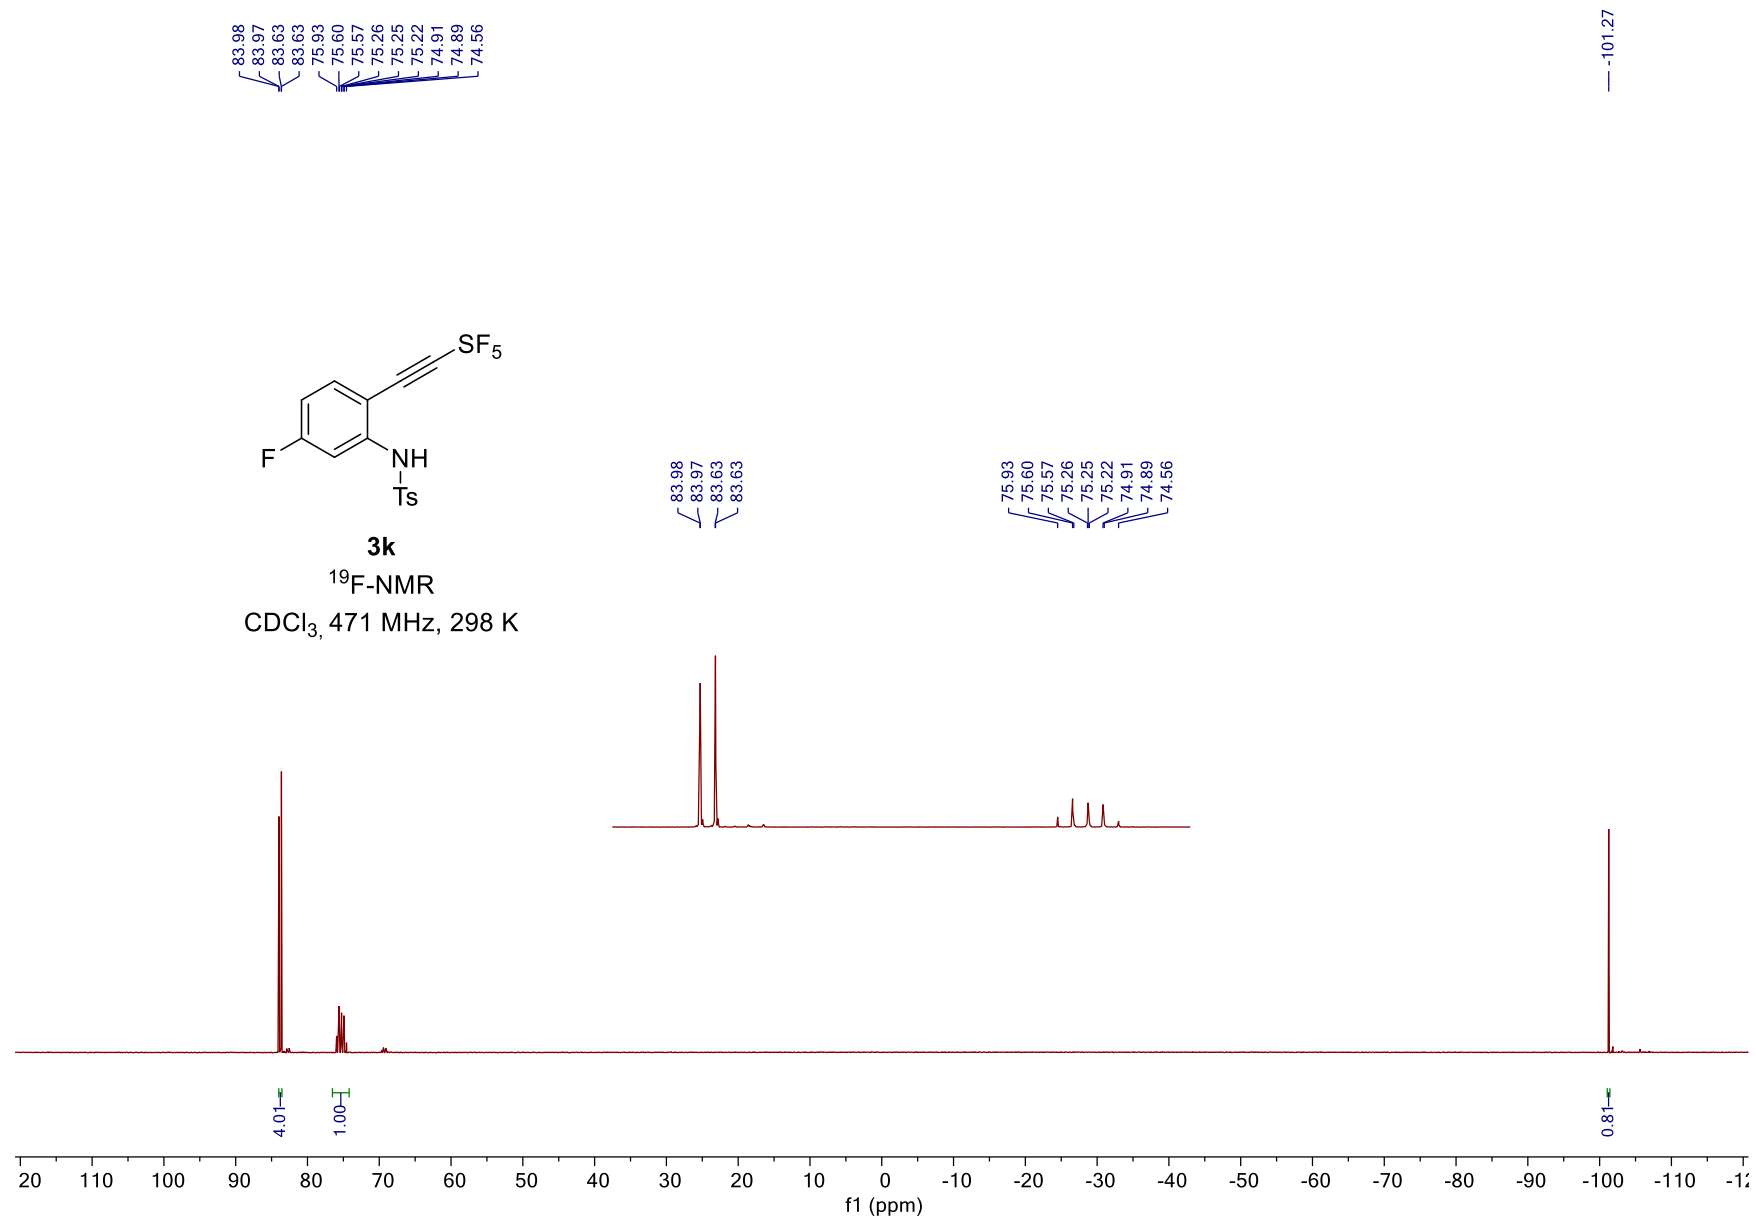

8.36  
8.34  
7.54  
7.52  
7.50  
7.49  
7.49  
7.35  
7.33  
7.31  
7.26  
7.13  
7.11

— 2.31

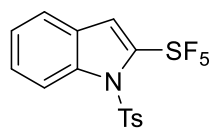**4a**<sup>1</sup>H-NMRCDCl<sub>3</sub>, 500 MHz, 298 K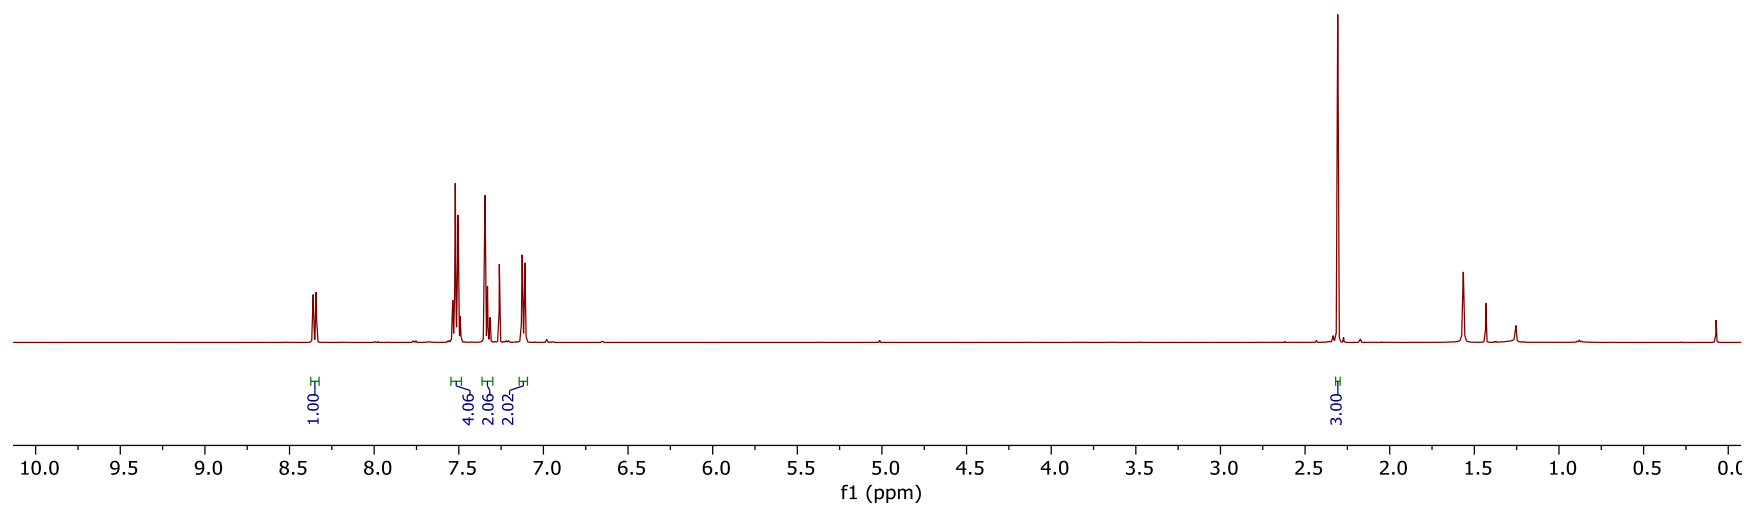

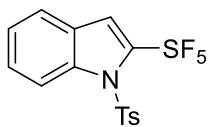**4a**<sup>13</sup>C-NMRCDCl<sub>3</sub>, 125 MHz, 298 K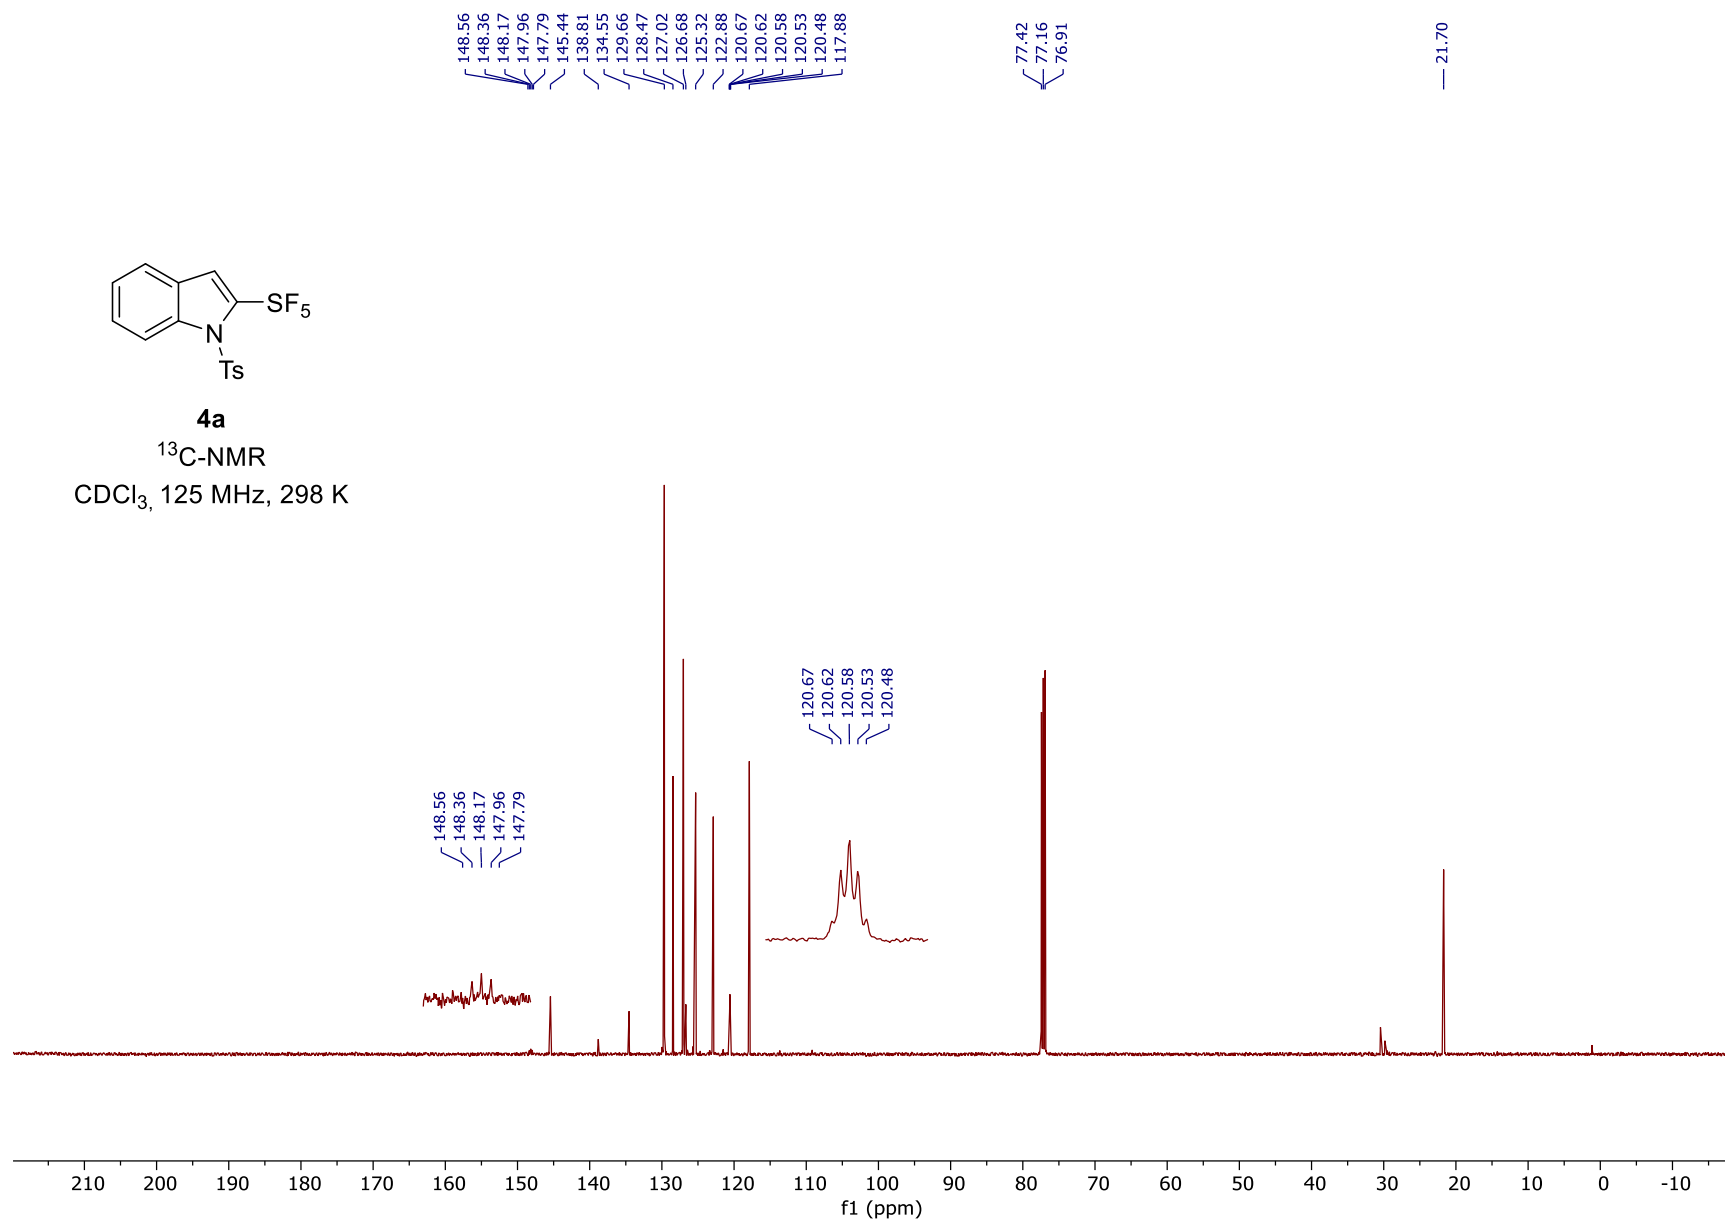

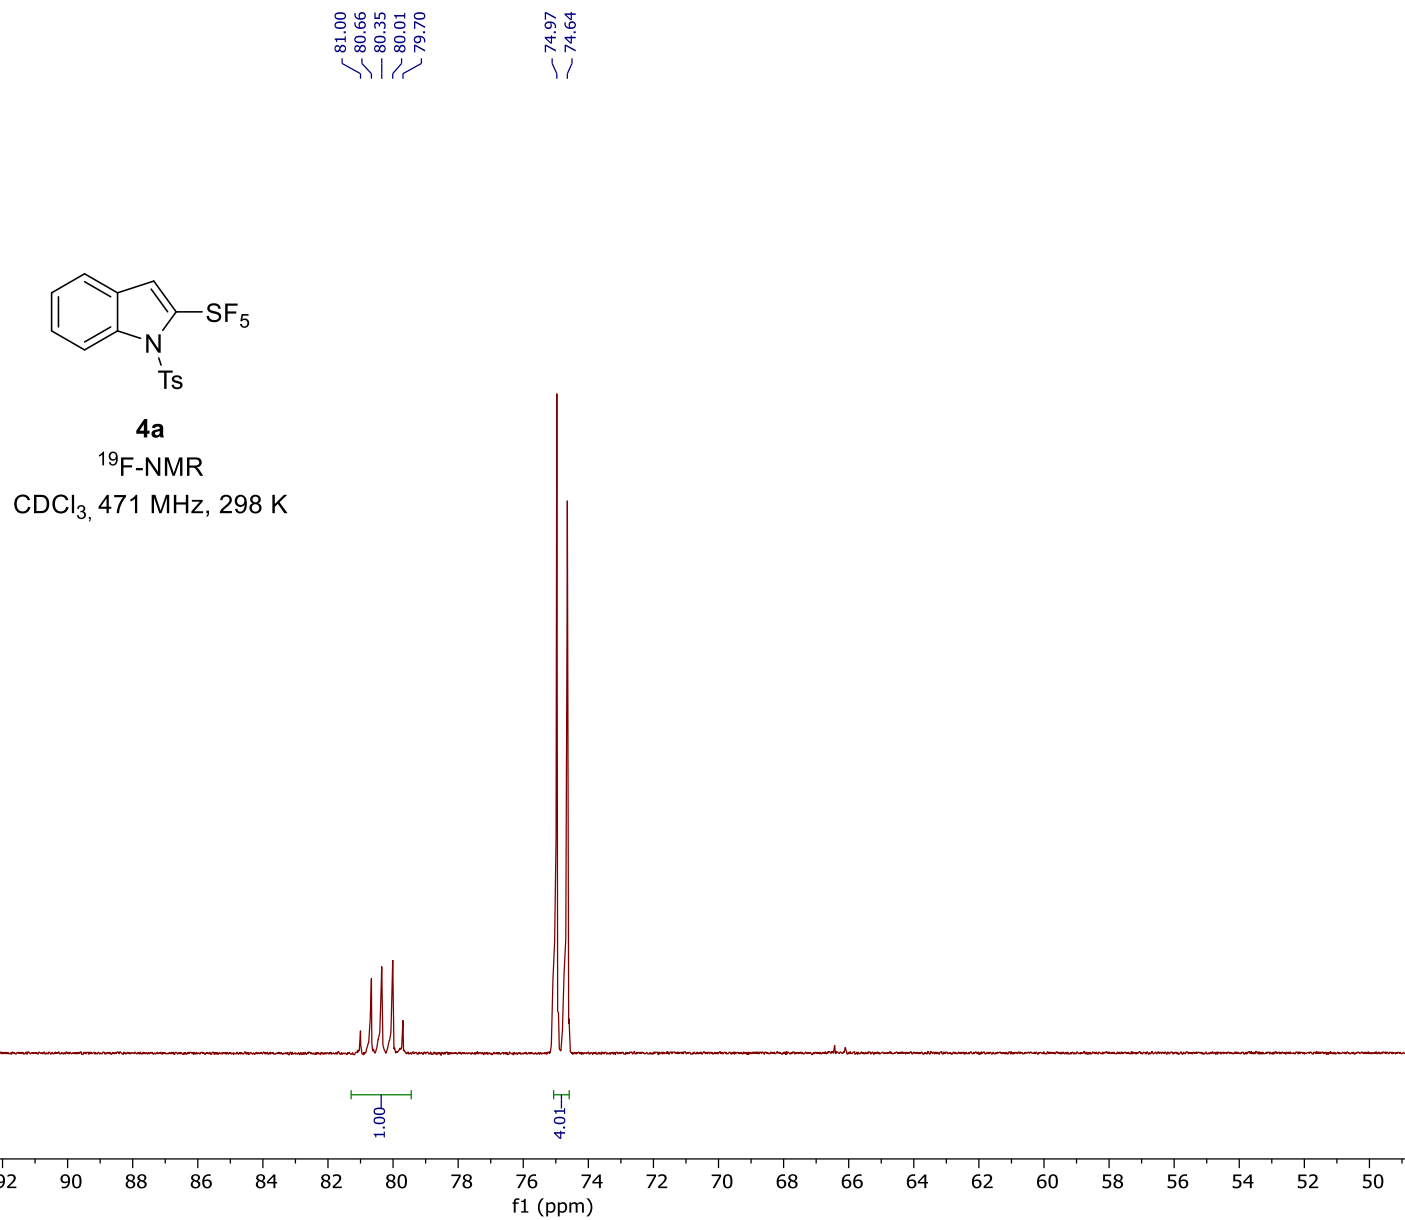

8.22  
8.20  
7.51  
7.49  
7.32  
7.32  
7.30  
7.29  
7.29  
7.26  
7.12  
7.10

2.41  
2.31

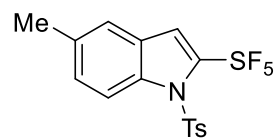**4b**

<sup>1</sup>H-NMR  
CDCl<sub>3</sub>, 500 MHz, 298 K

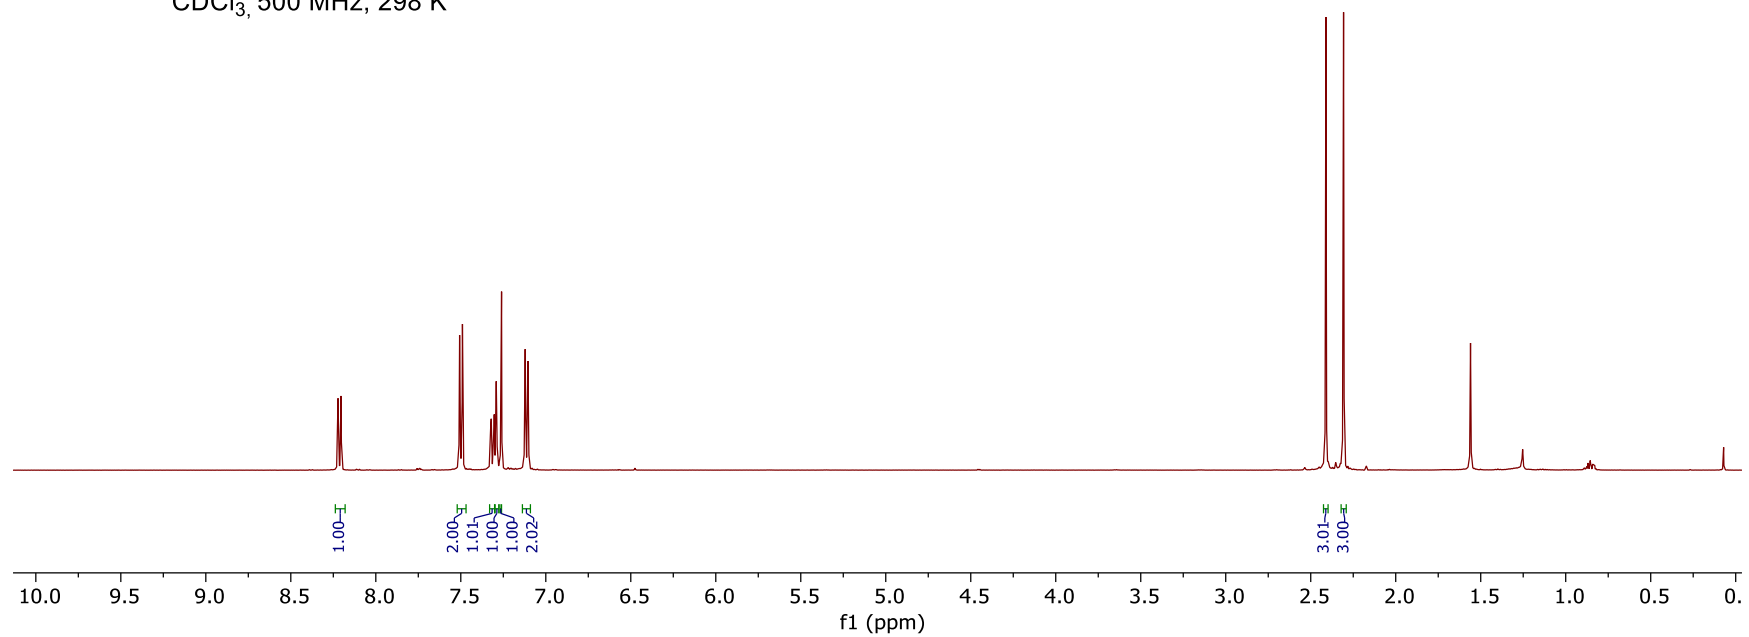



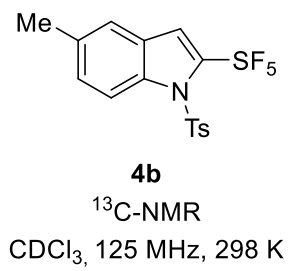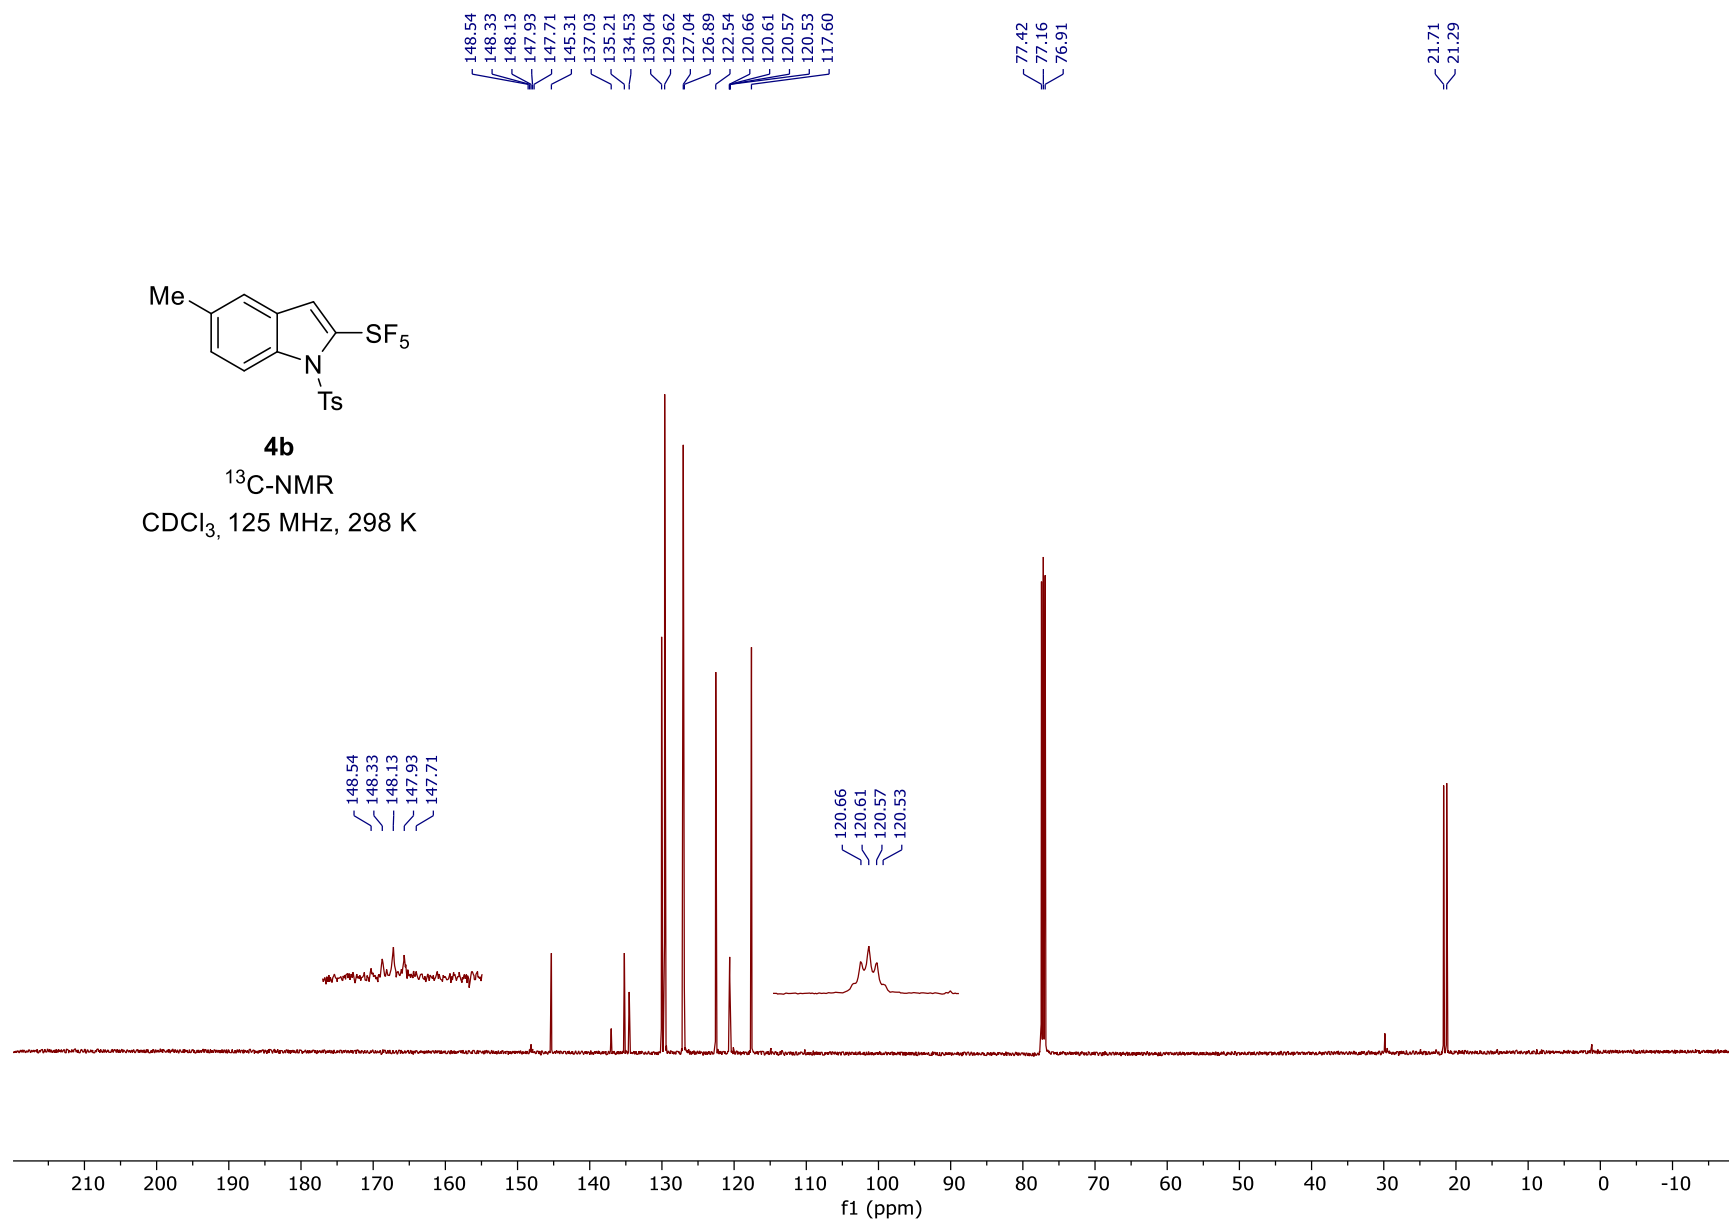

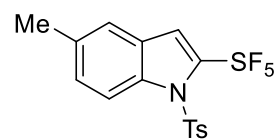**4b**<sup>19</sup>F-NMRCDCl<sub>3</sub>, 471 MHz, 298 K

81.24  
80.94  
80.90  
80.62  
80.59  
80.57  
80.29  
80.25  
79.94

74.89  
74.56

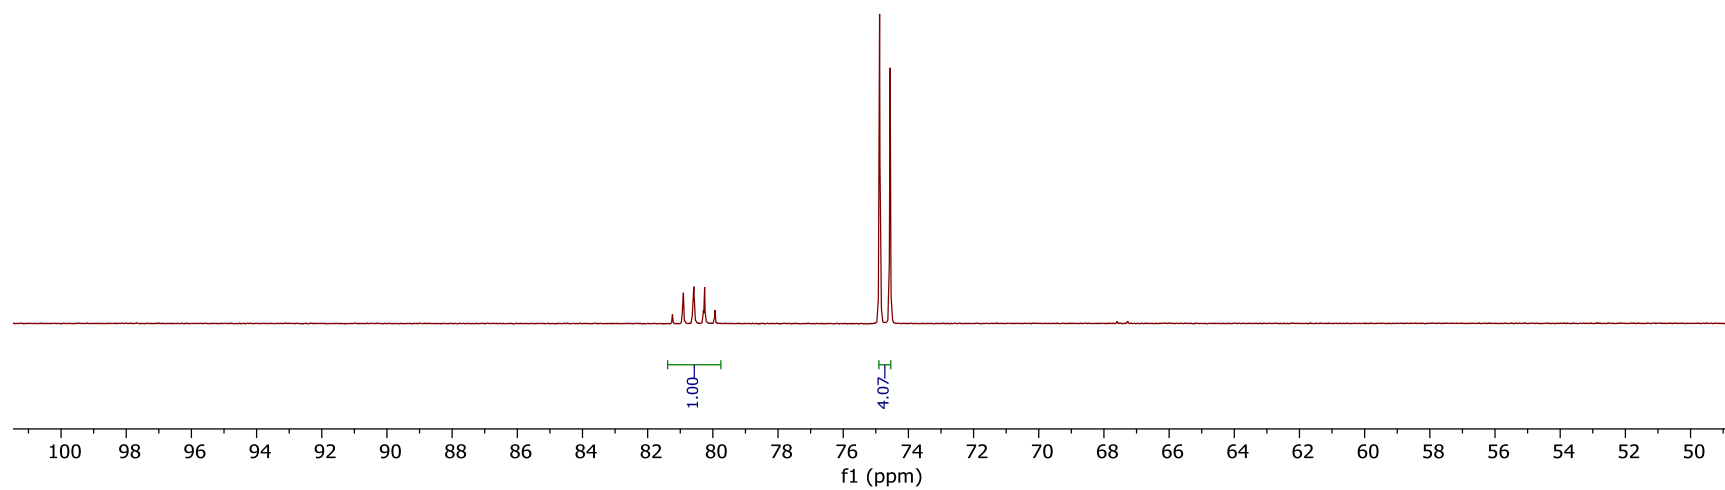

8.42  
8.42  
8.42  
8.40  
8.40  
8.40  
8.26  
8.26  
8.26  
8.25  
8.18  
8.17  
8.16  
8.15  
7.54  
7.54  
7.53  
7.53  
7.39  
7.39  
7.26  
7.15  
7.15  
7.15  
7.14  
7.14

3.94

2.32

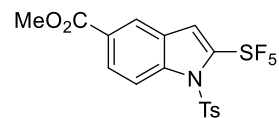

**4f**

<sup>1</sup>H-NMR

CDCl<sub>3</sub>, 500 MHz, 298 K

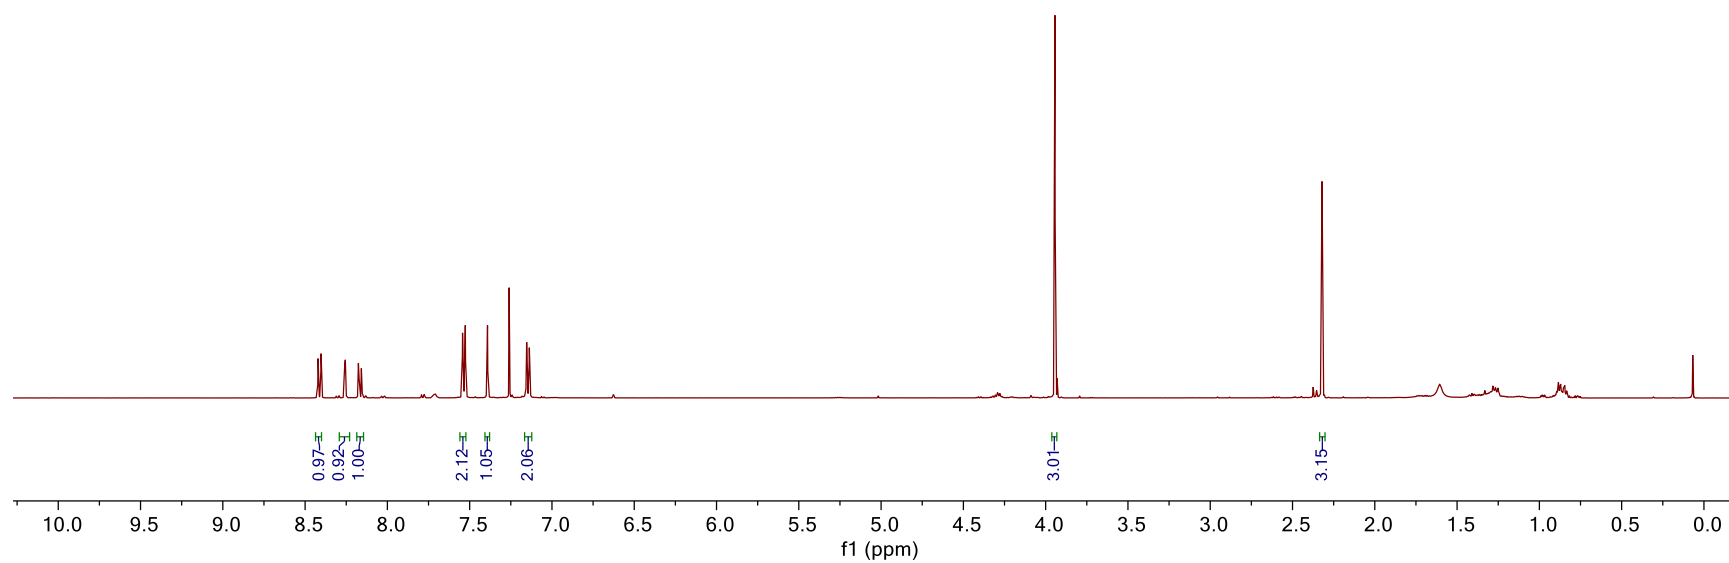

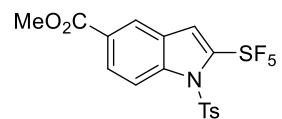**4f** $^{13}\text{C}$ -NMRCDCl<sub>3</sub>, 125 MHz, 298 K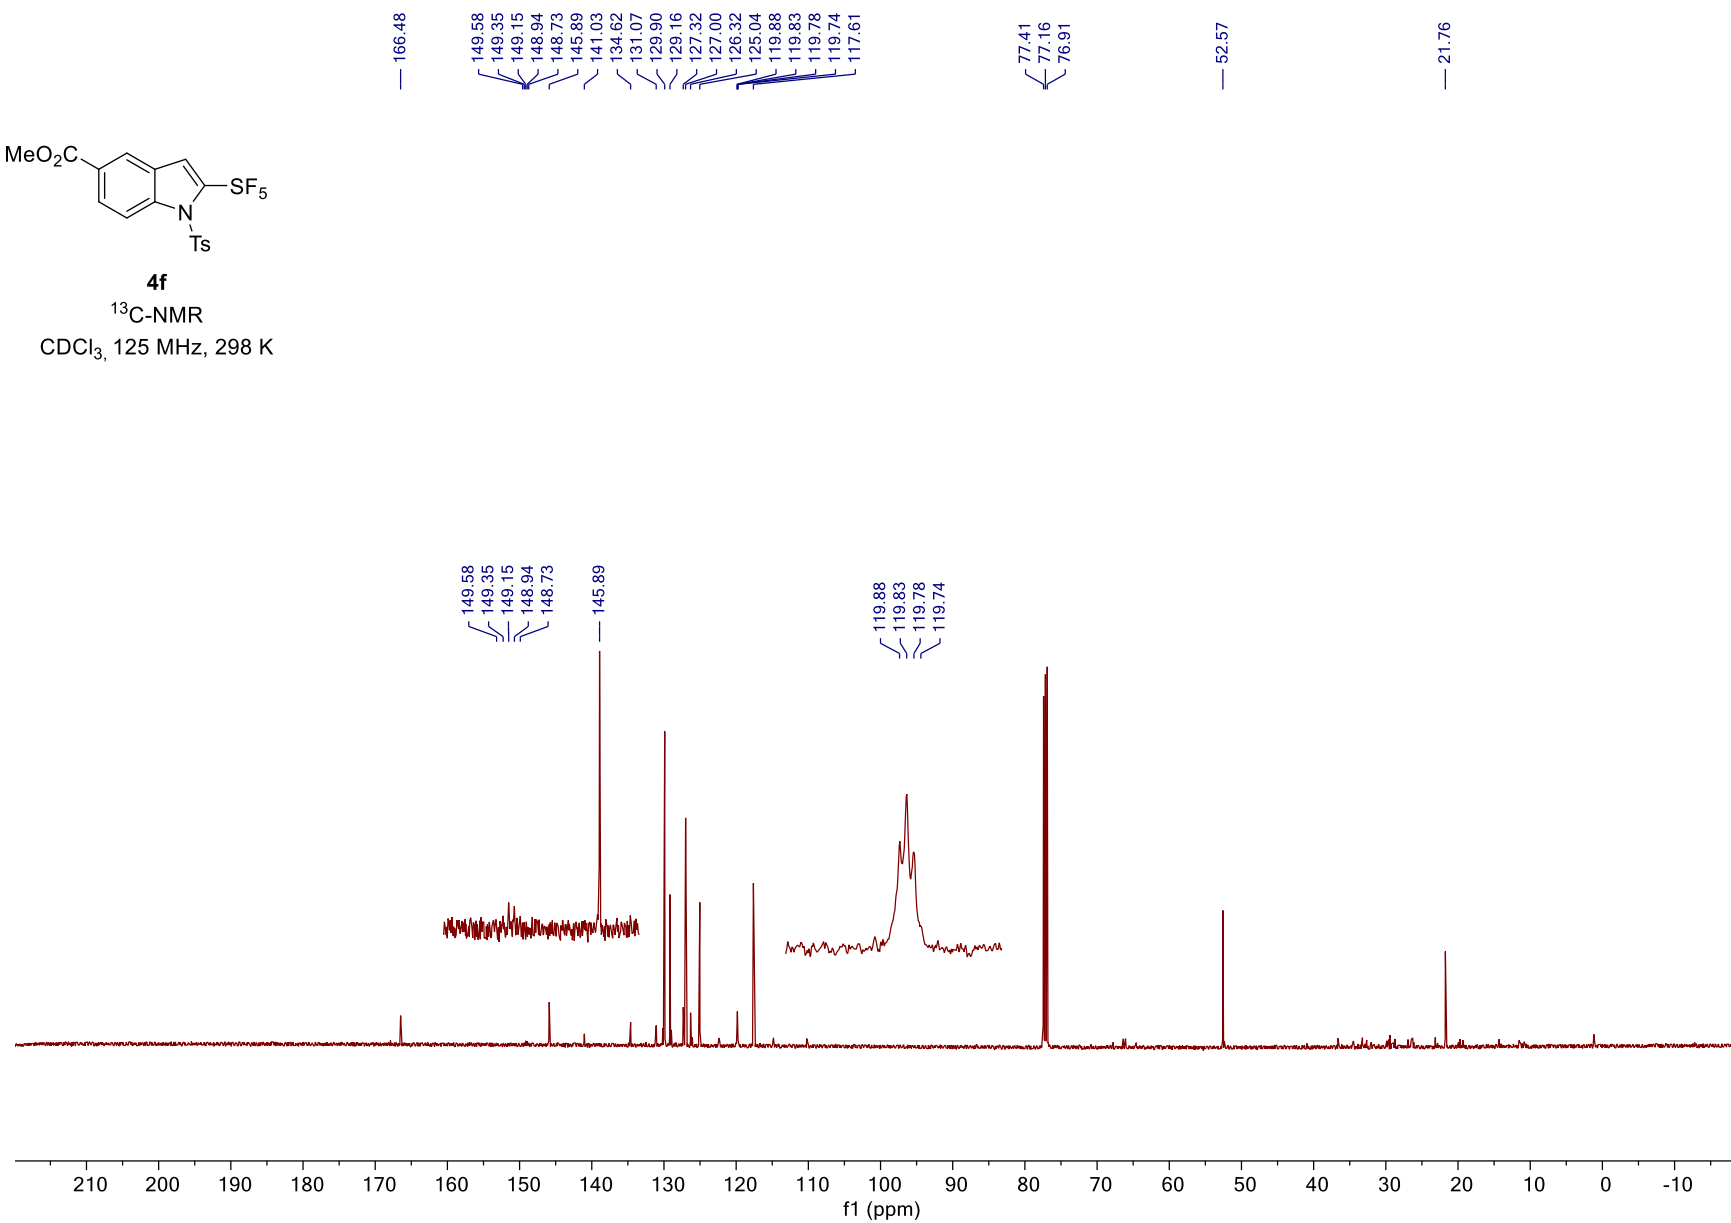

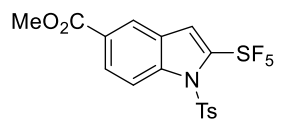**4f**<sup>19</sup>F-NMRCDCl<sub>3</sub>, 471 MHz, 298 K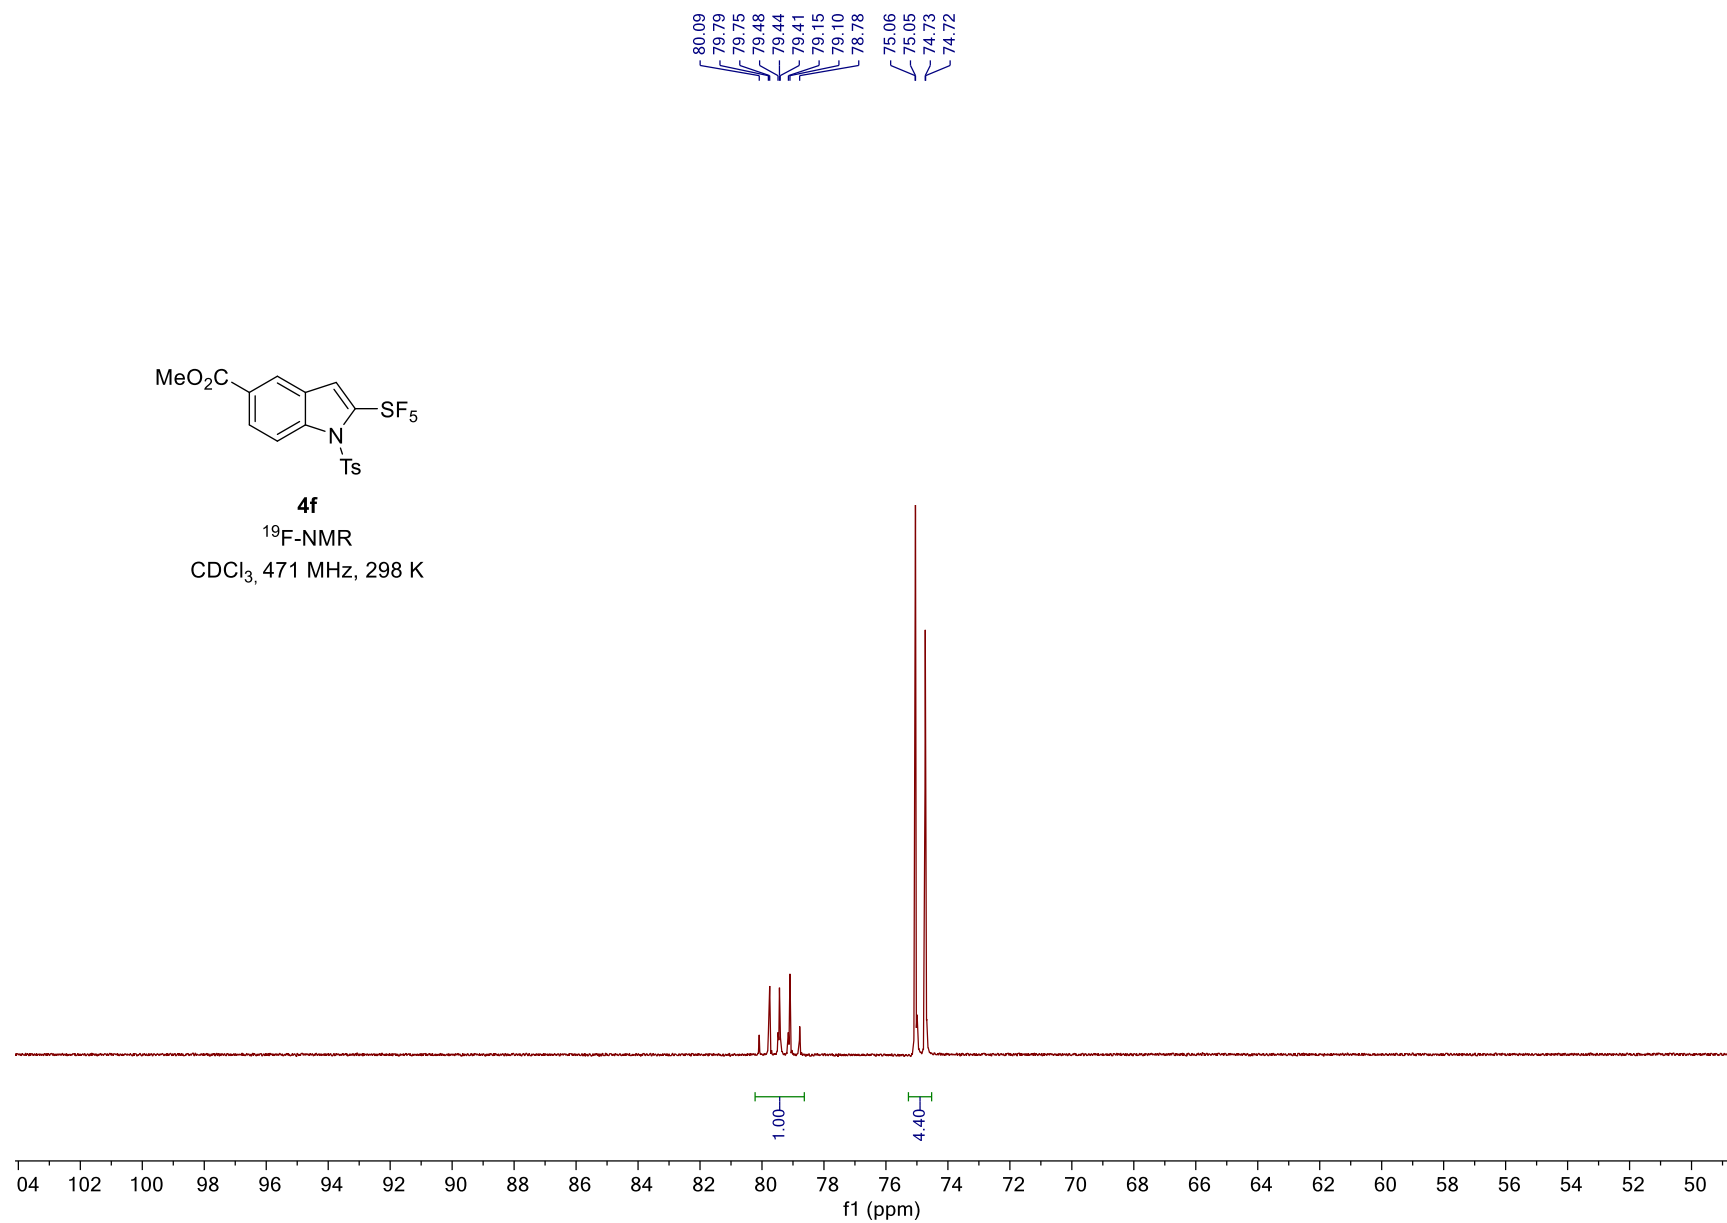

8.41  
8.39  
7.54  
7.52  
7.40  
7.37  
7.37  
7.36  
7.35  
7.33  
7.26  
7.18  
7.16

— 2.34

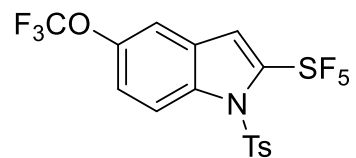

**4g**

<sup>1</sup>H-NMR

CDCl<sub>3</sub>, 500 MHz, 298 K

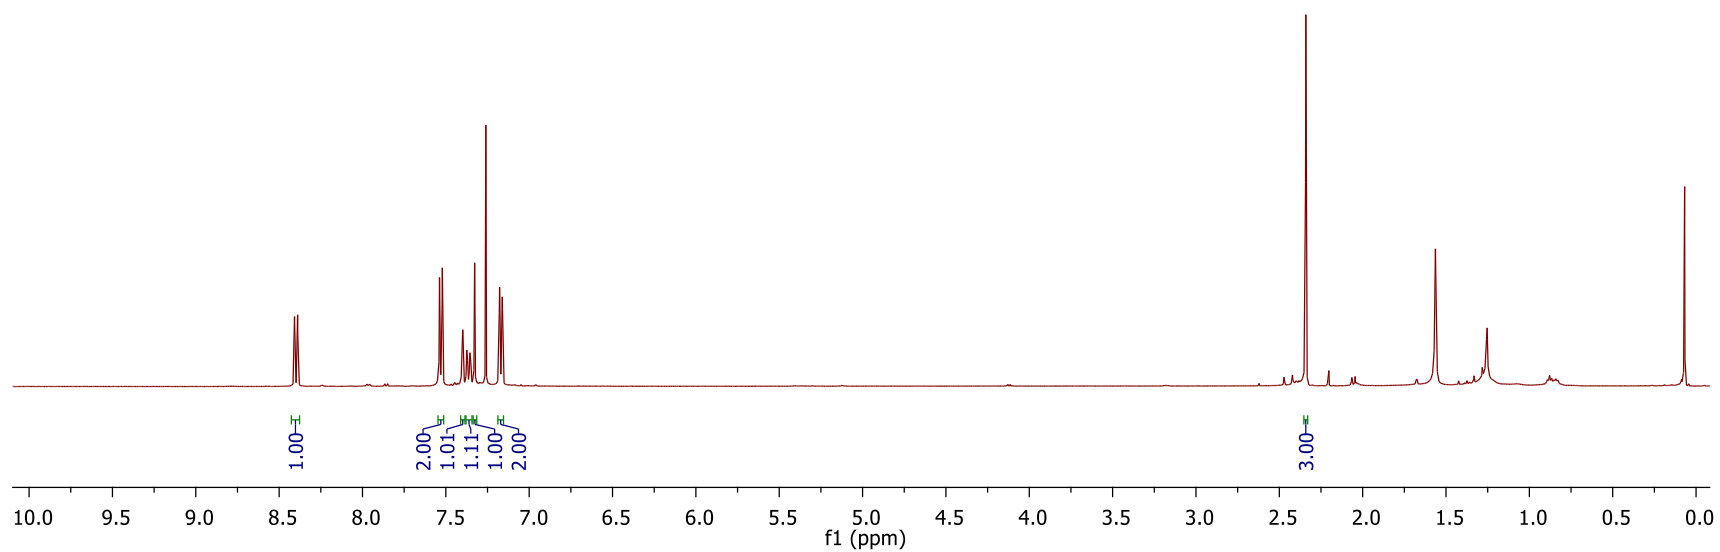

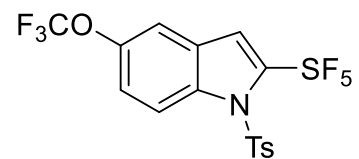**4g**<sup>13</sup>C-NMRCDCl<sub>3</sub>, 125 MHz, 298 K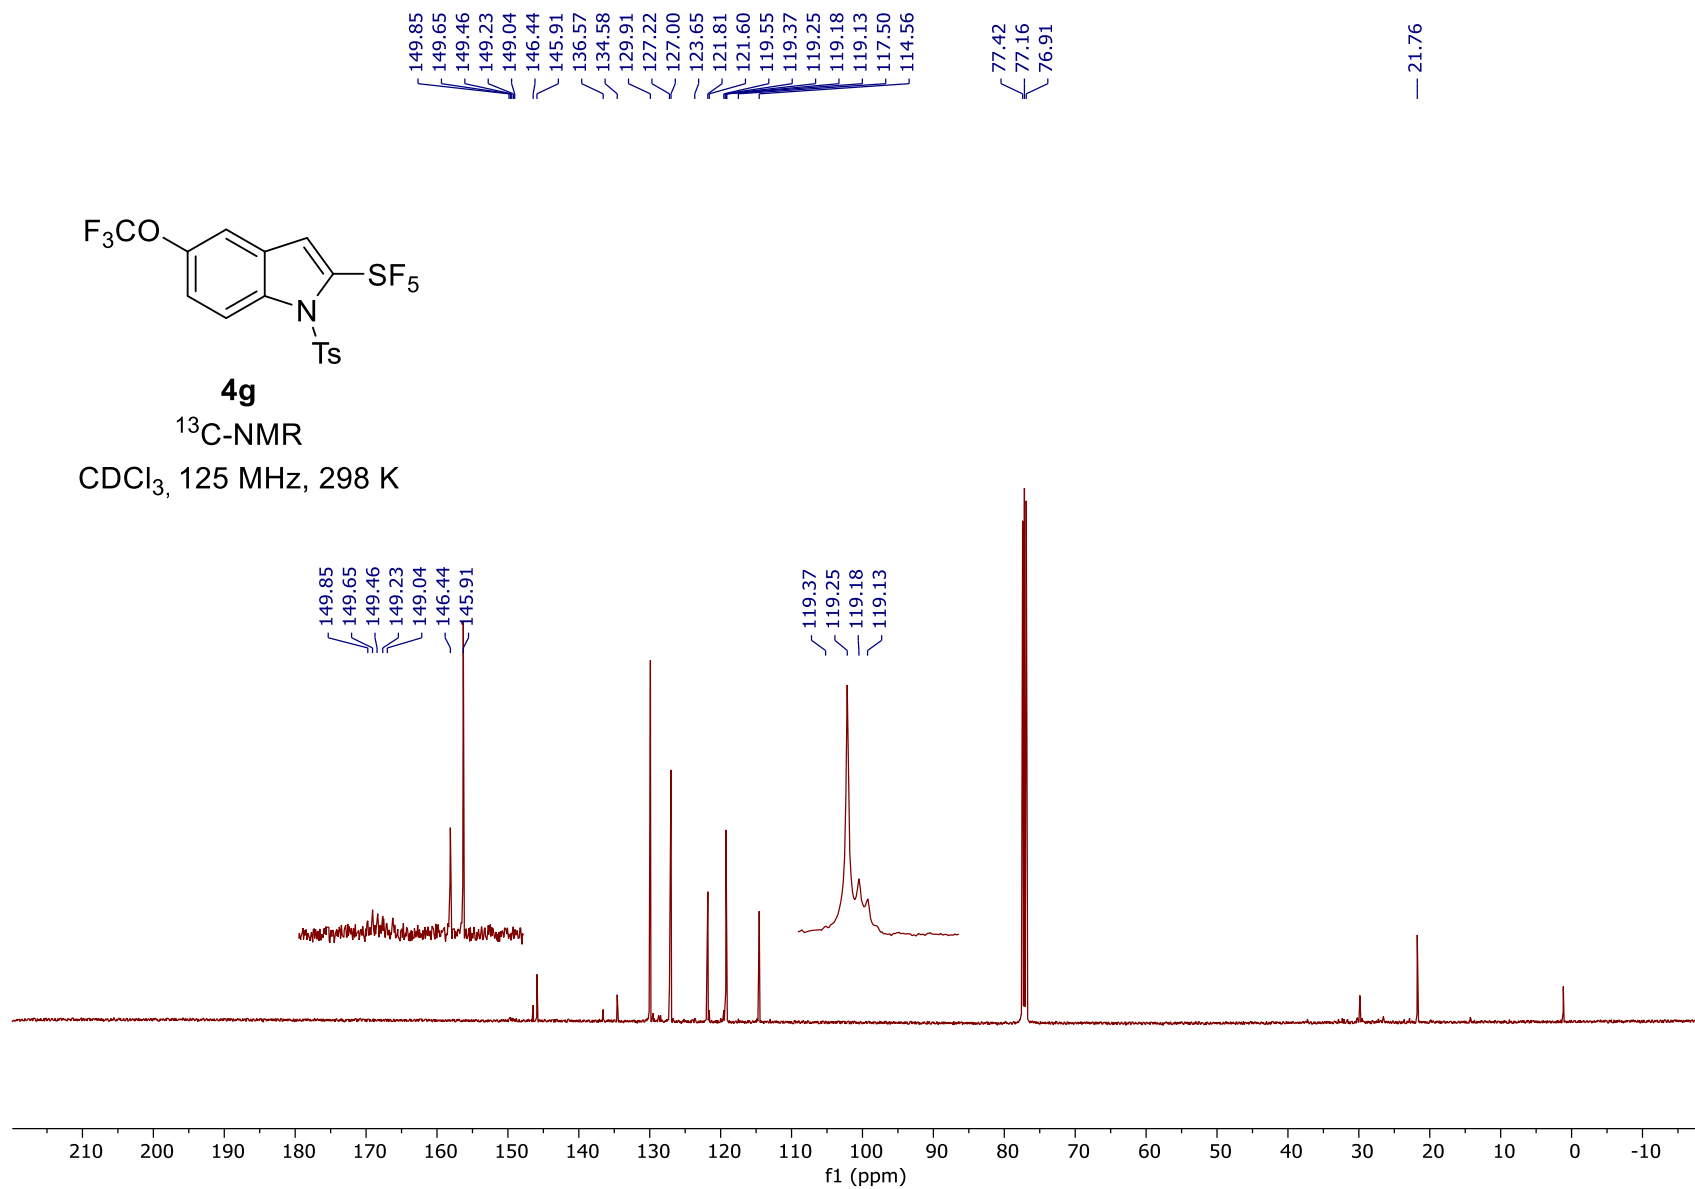

79.91  
79.58  
79.24  
78.92  
78.61  
74.92  
74.60

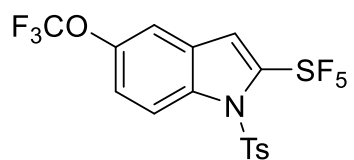

**4g**

<sup>19</sup>F-NMR

CDCl<sub>3</sub>, 471 MHz, 298 K

-58.11

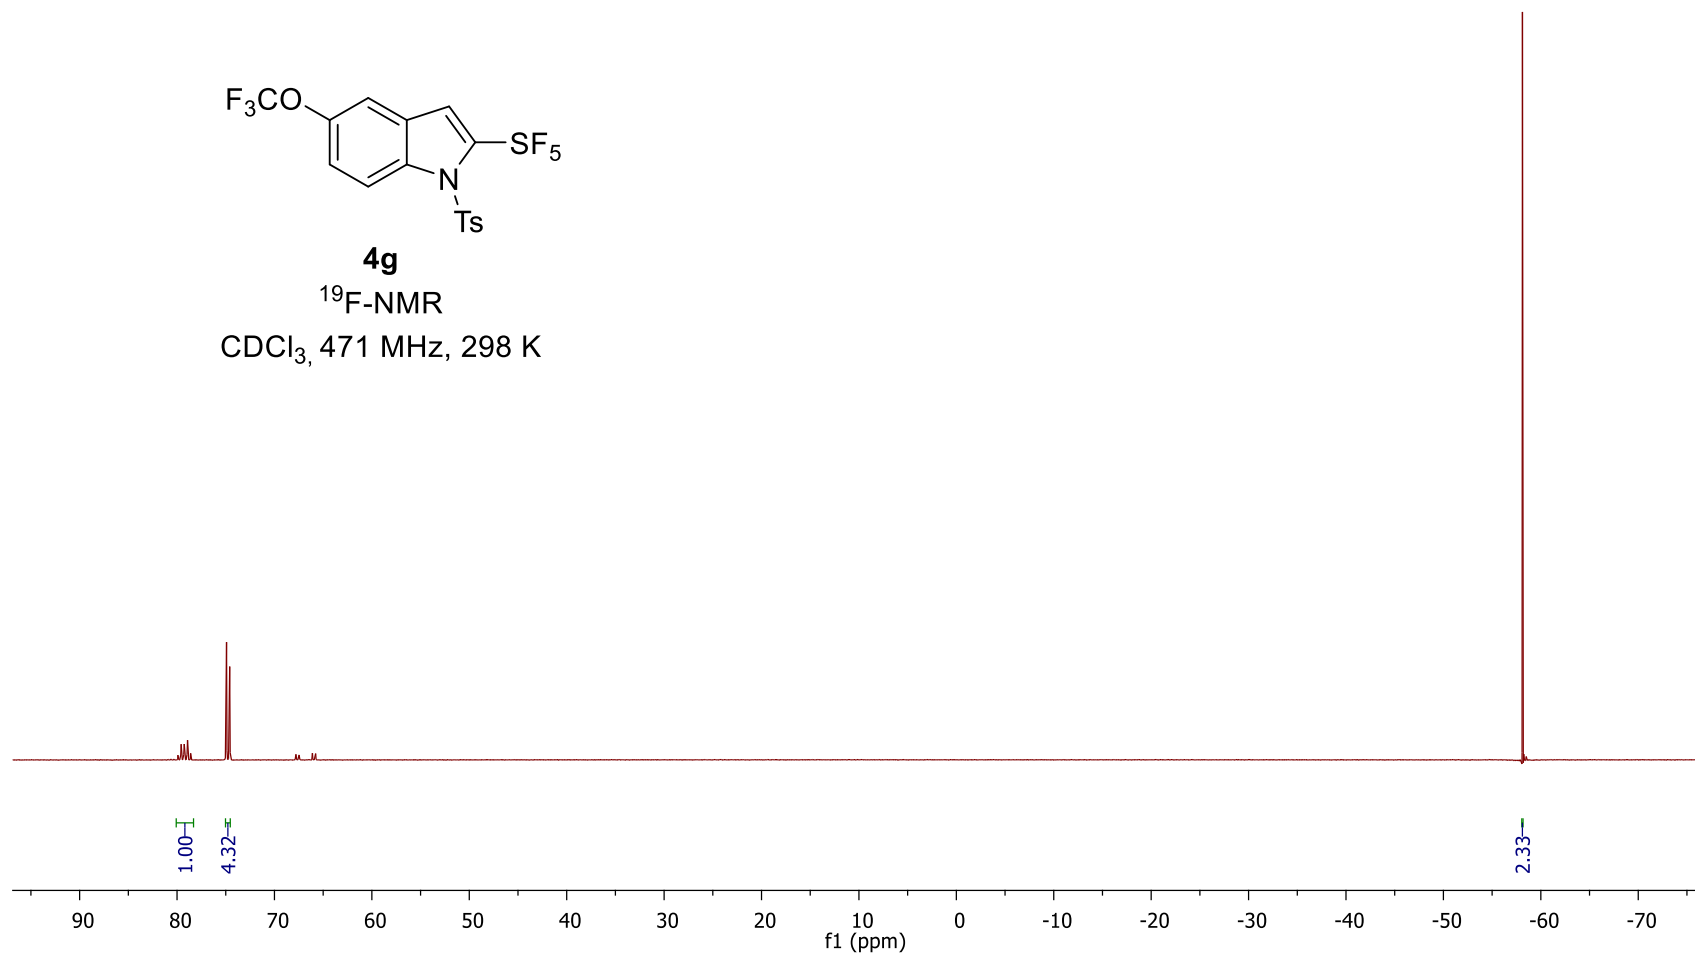



8.50  
8.49  
7.92  
7.91  
7.75  
7.75  
7.73  
7.73  
7.56  
7.55  
7.54  
7.54  
7.38  
7.26  
7.20  
7.19

— 2.35

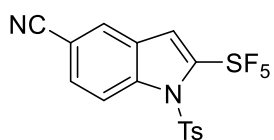

**4h**

$^1\text{H-NMR}$

$\text{CDCl}_3$ , 500 MHz, 298 K

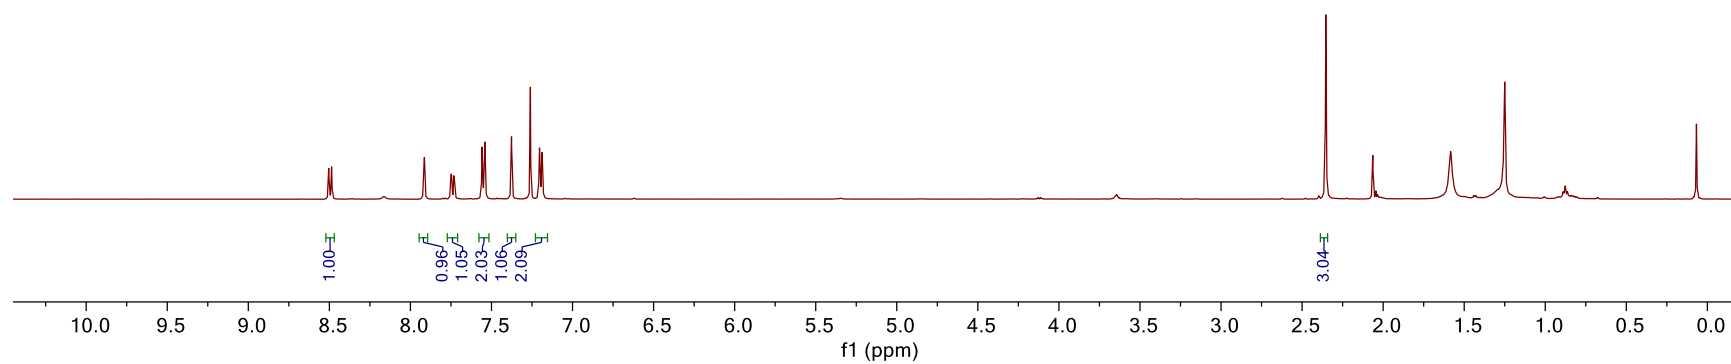

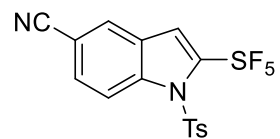**4h** $^{13}\text{C}$ -NMR $\text{CDCl}_3$ , 125 MHz, 298 K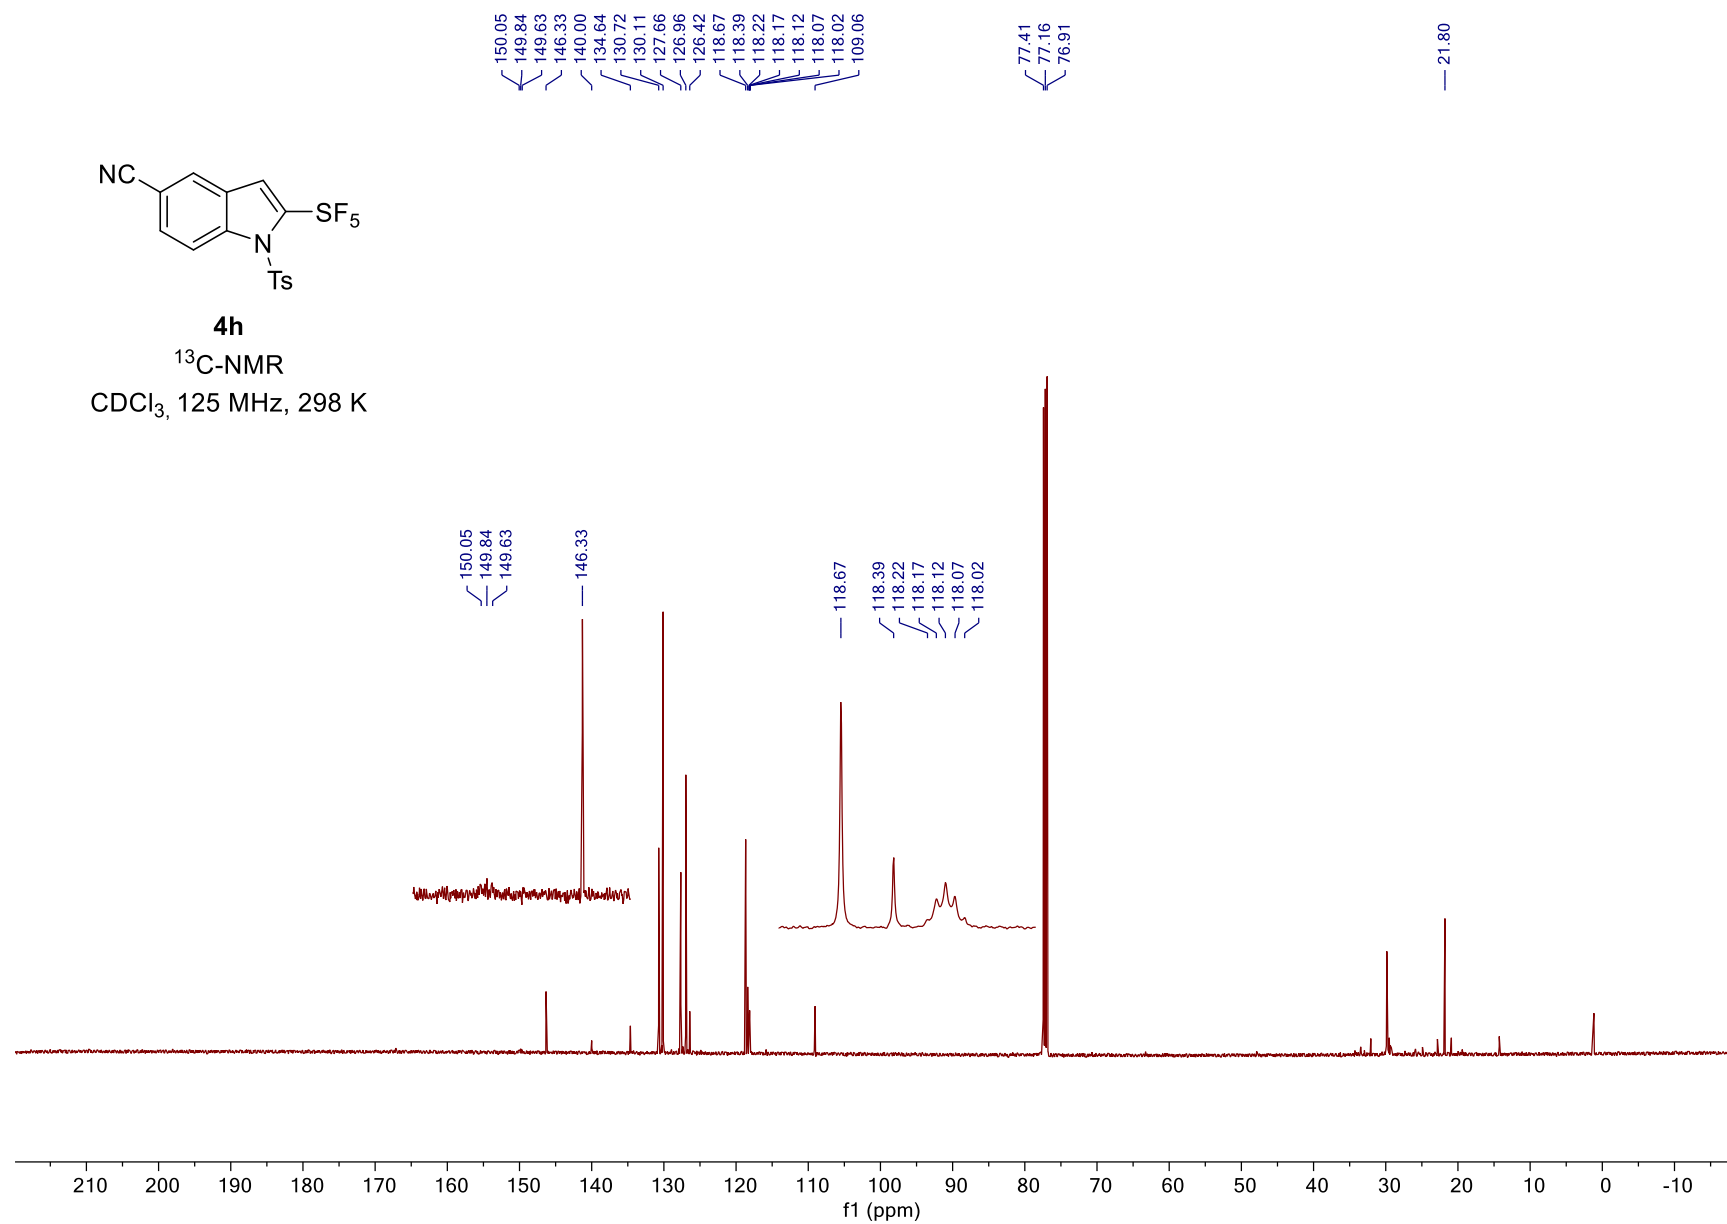

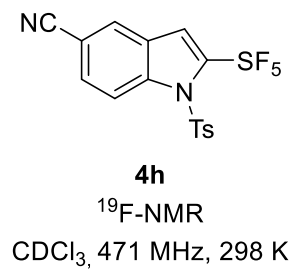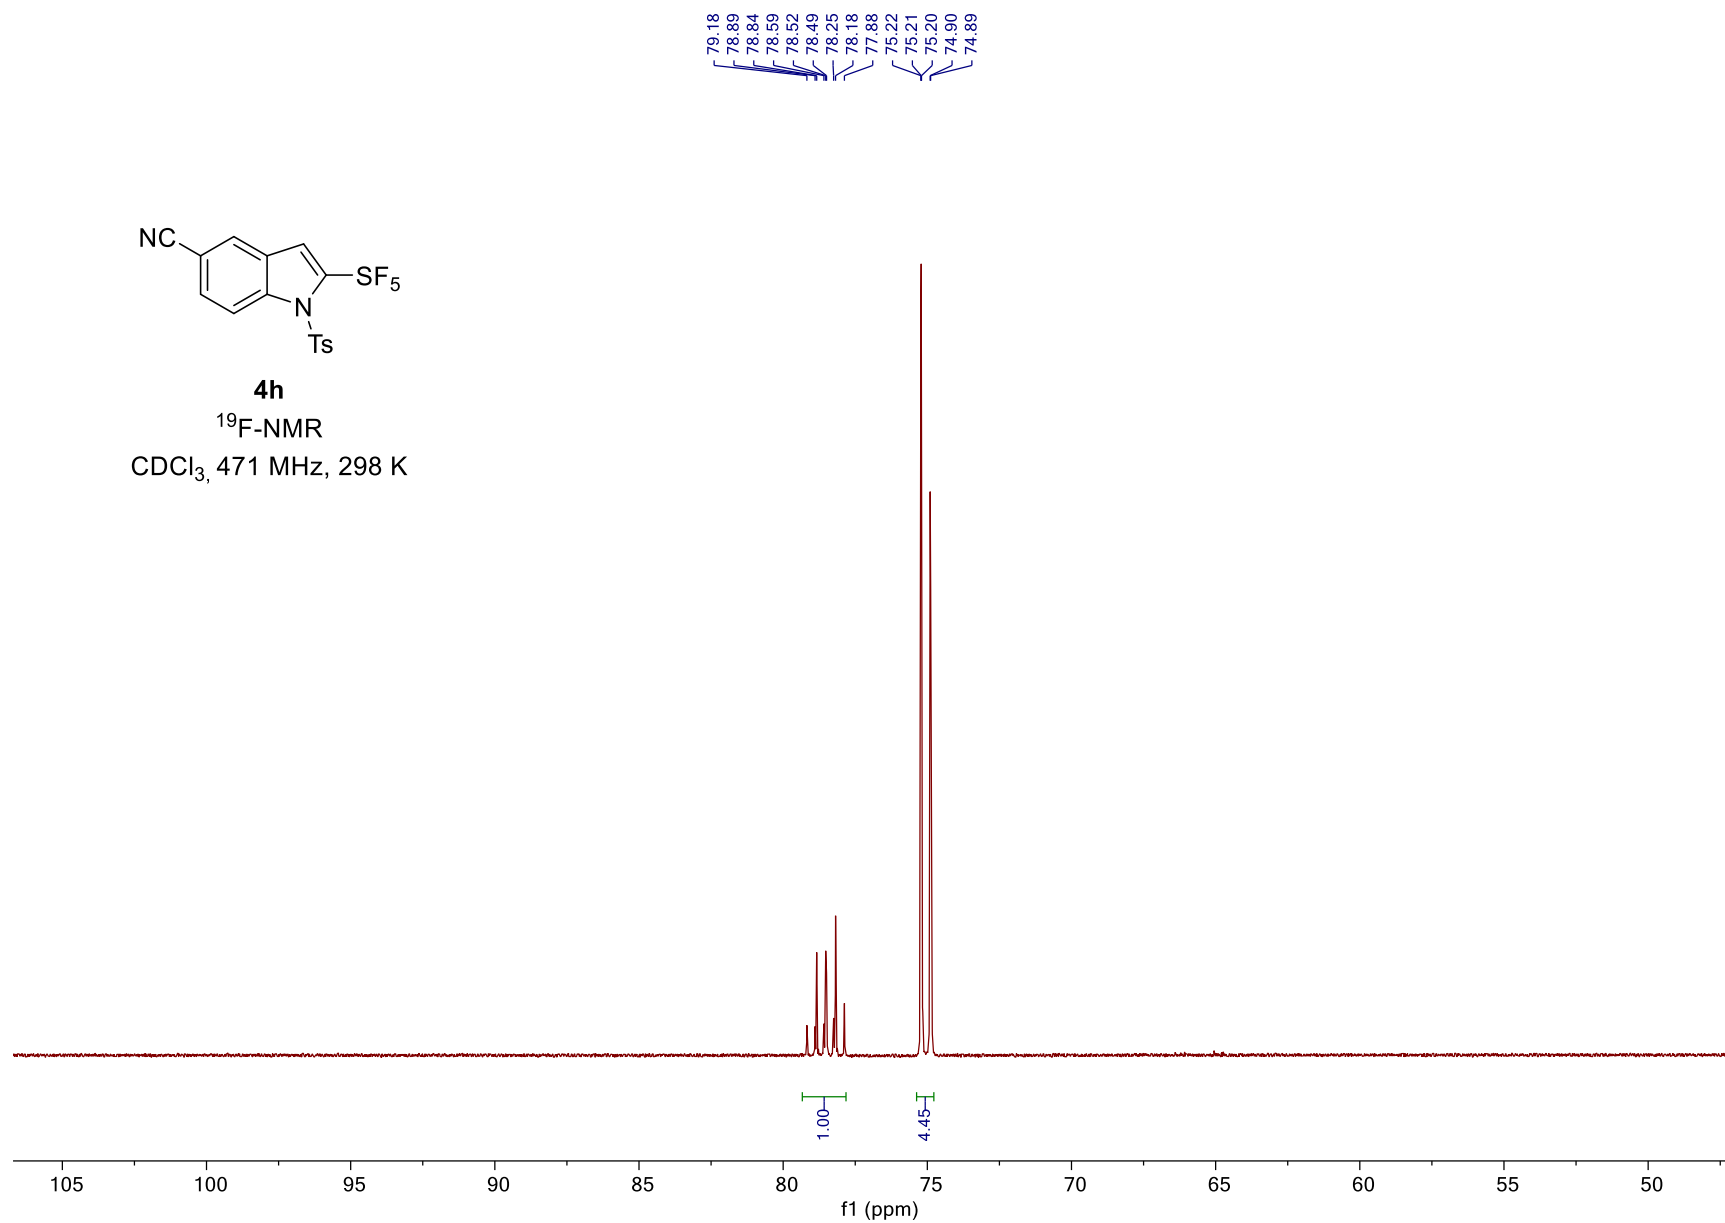

8.25  
7.68  
7.67  
7.60  
7.59  
7.58  
7.52  
7.50  
7.26  
7.17  
7.16  
7.15  
7.15

— 2.34

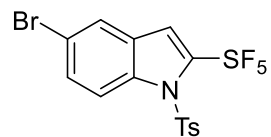

**4i**

<sup>1</sup>H-NMR

CDCl<sub>3</sub>, 500 MHz, 298 K

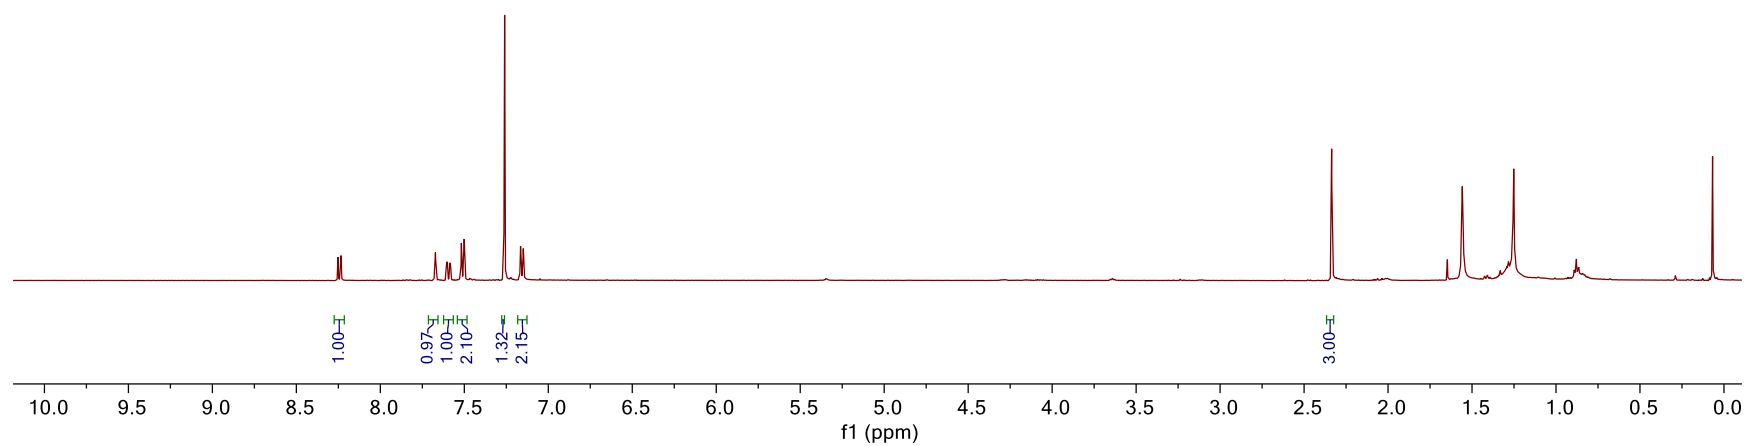

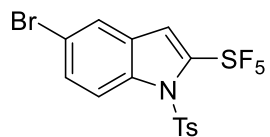**4i**<sup>13</sup>C-NMRCDCl<sub>3</sub>, 125 MHz, 298 K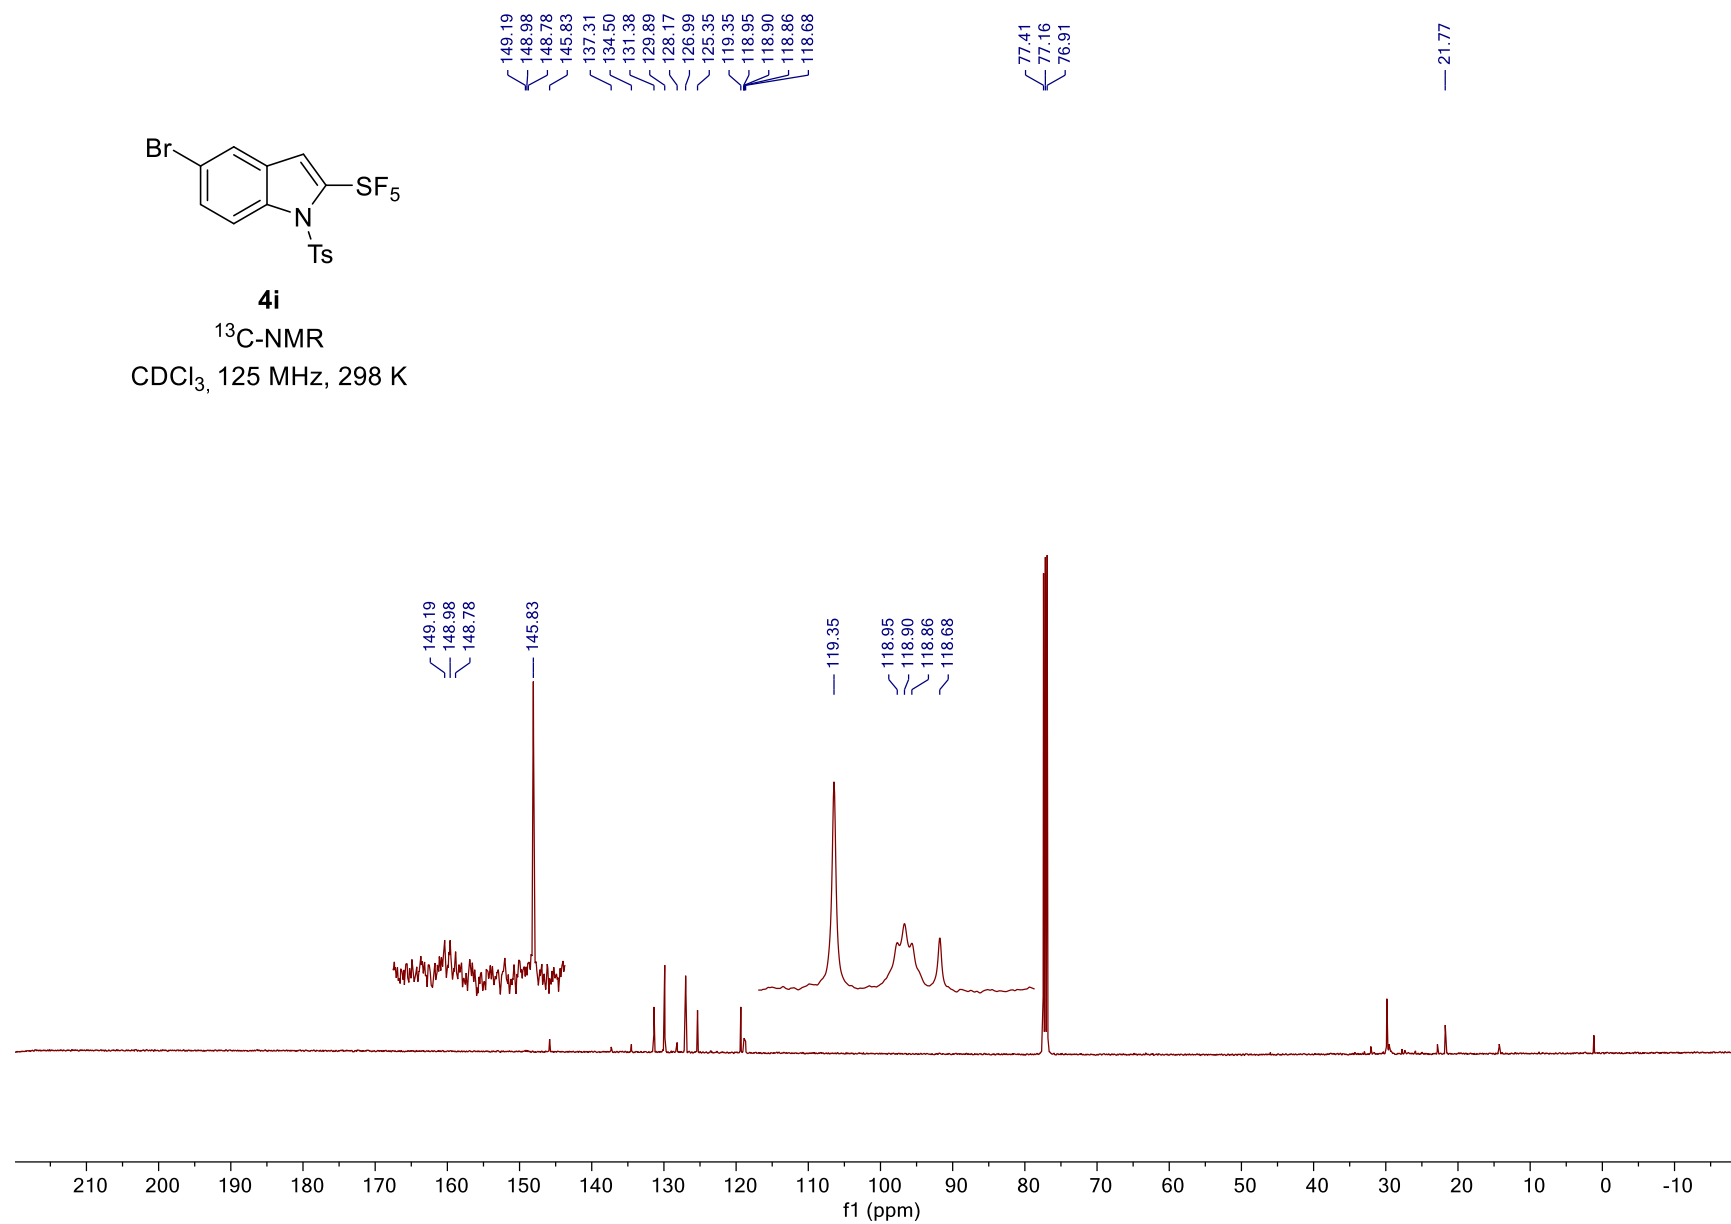

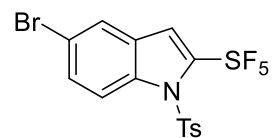**4i**<sup>19</sup>F-NMRCDCl<sub>3</sub>, 471 MHz, 298 K

80.09  
79.80  
79.75  
79.48  
79.44  
79.41  
79.15  
79.10  
78.79  
74.96  
74.95  
74.63  
74.62

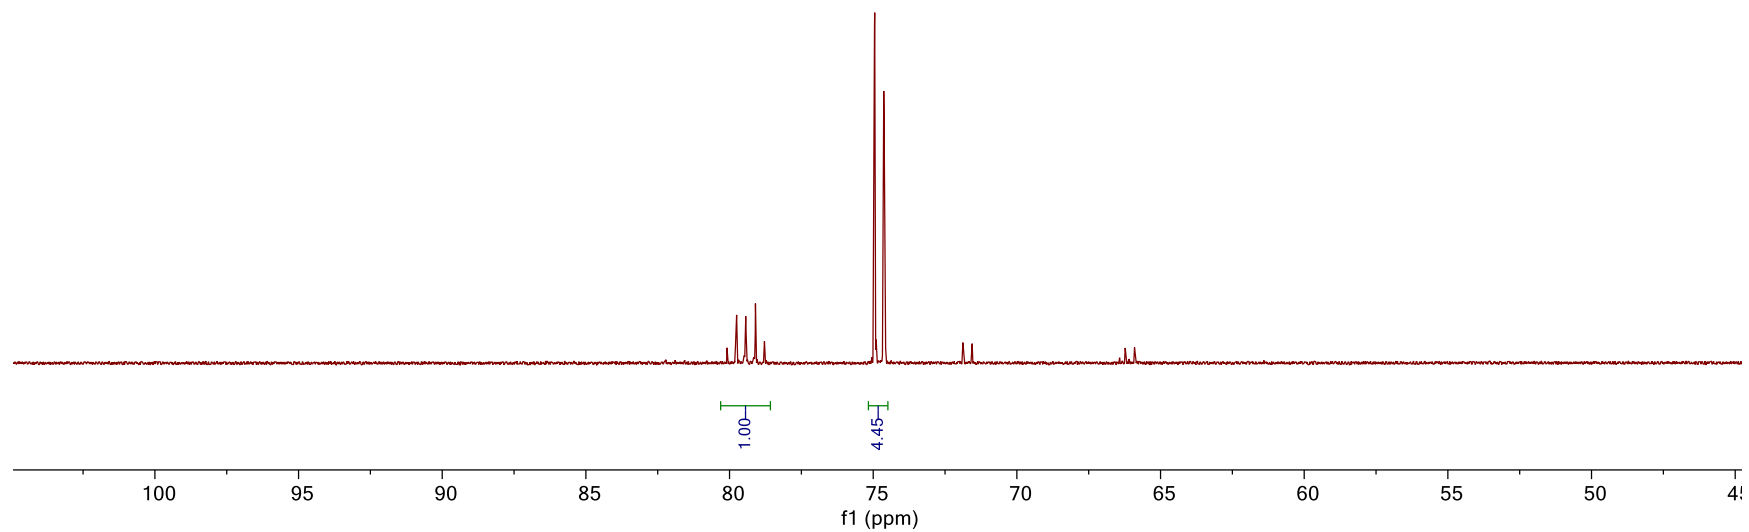

8.11  
8.10  
8.08  
8.08  
7.55  
7.54  
7.53  
7.53  
7.51  
7.50  
7.49  
7.48  
7.31  
7.31  
7.26  
7.17  
7.16  
7.15  
7.12  
7.11  
7.10  
7.09  
7.08  
7.08

— 2.33

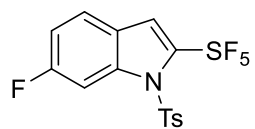

**4k**

<sup>1</sup>H-NMR

CDCl<sub>3</sub>, 500 MHz, 298 K

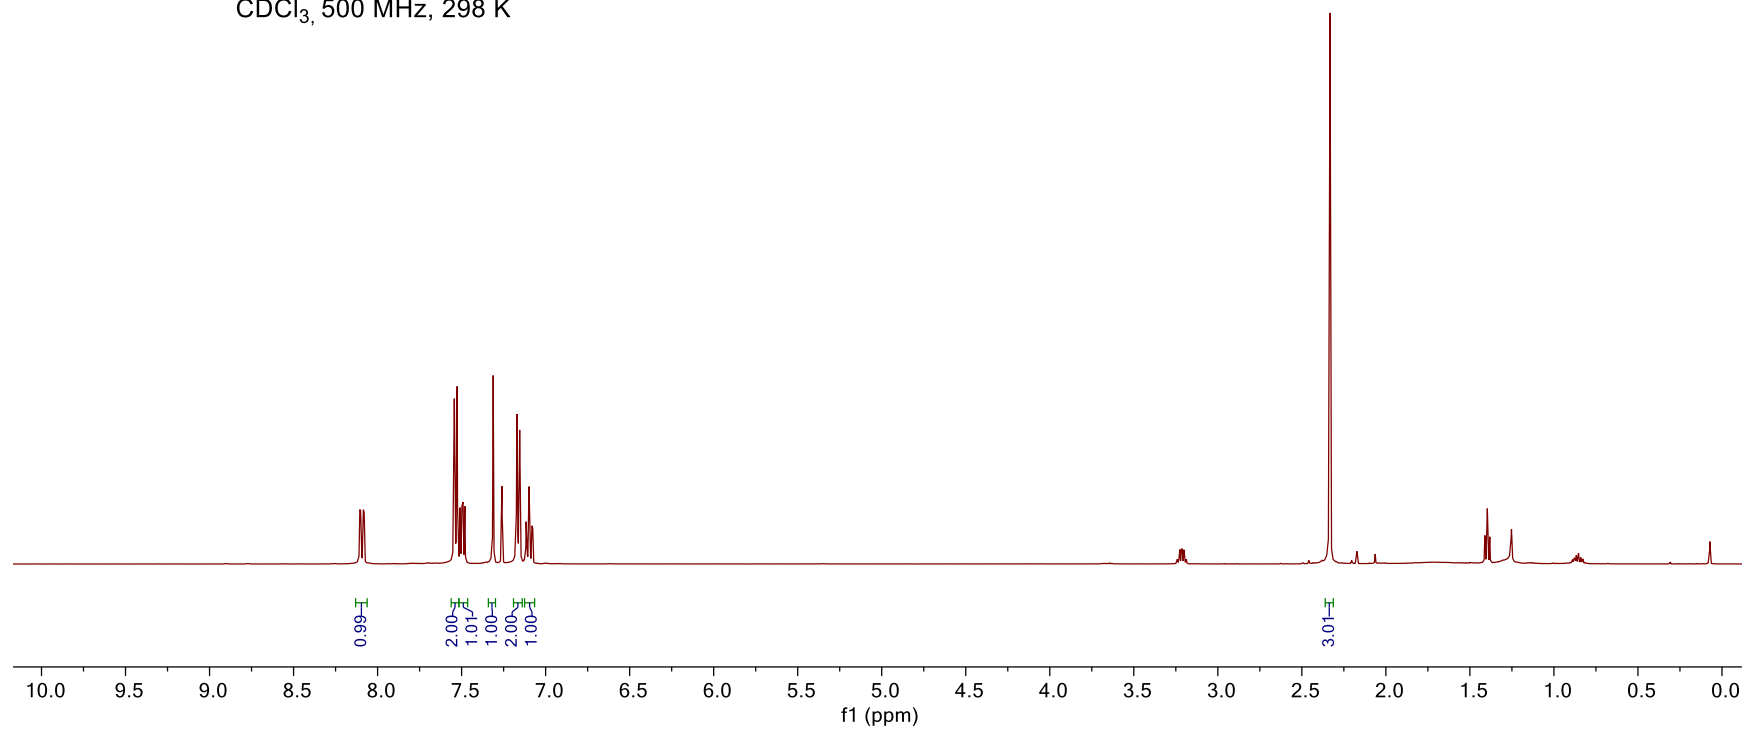

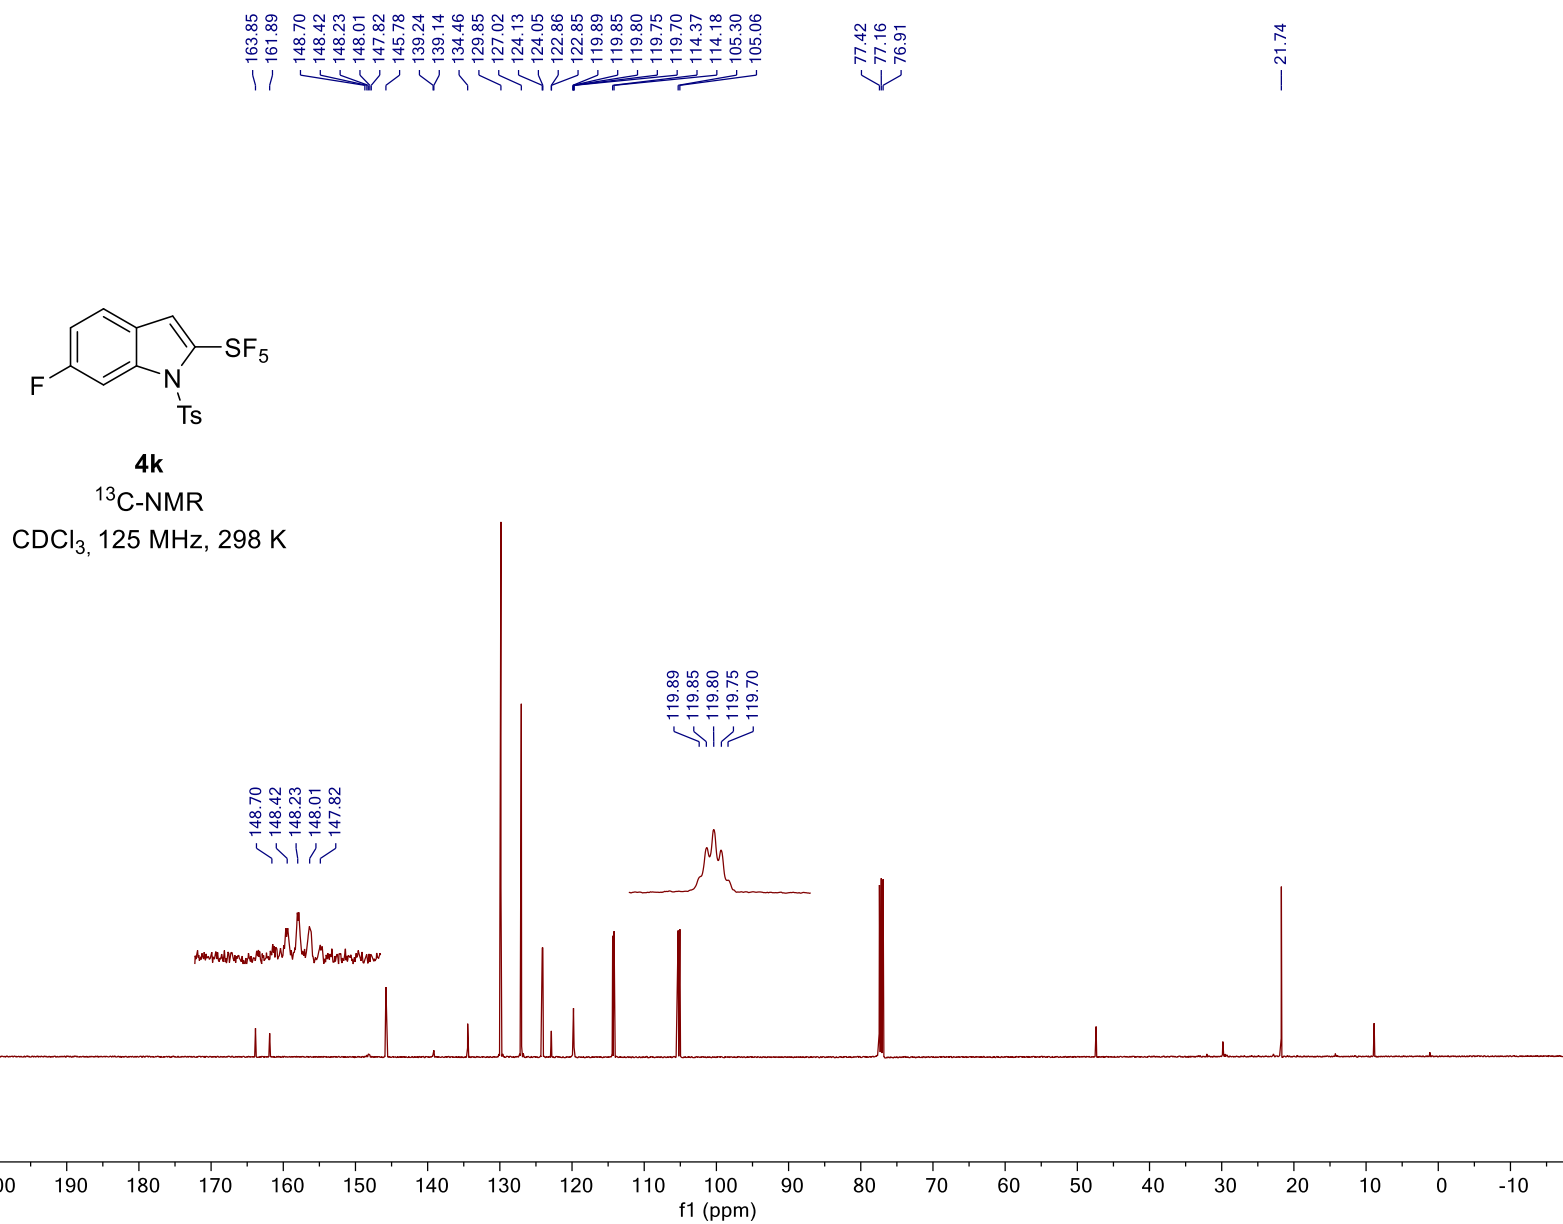



80.73  
80.44  
80.40  
80.12  
80.08  
80.06  
79.79  
79.75  
79.43  
75.04  
75.03  
74.72  
74.71

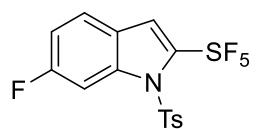

**4k**

$^{19}\text{F}$ -NMR

$\text{CDCl}_3$ , 471 MHz, 298 K

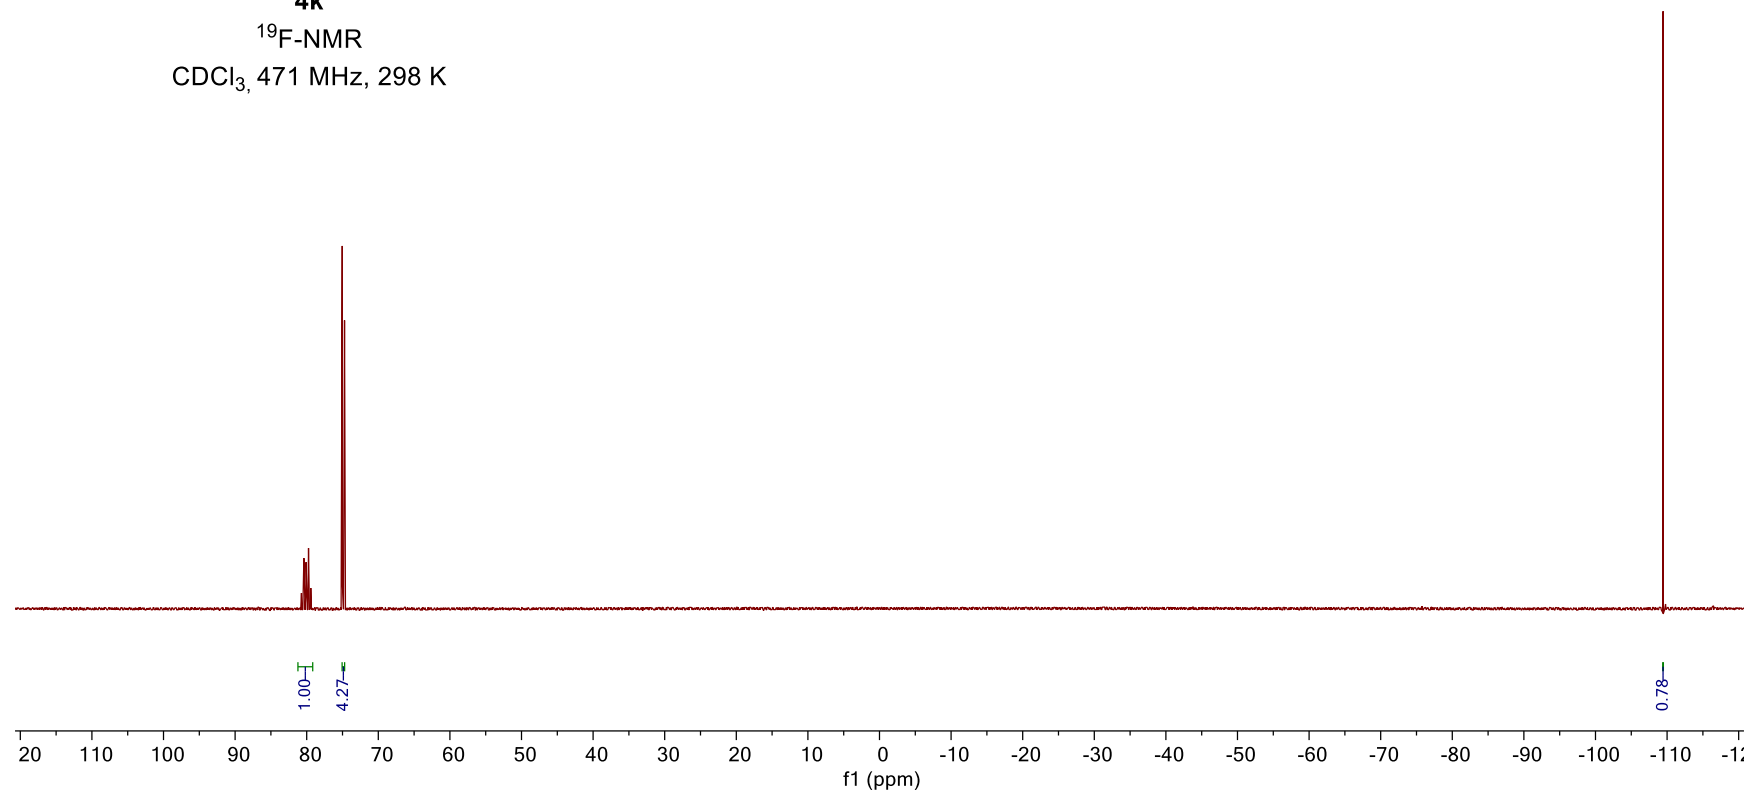

8.61  
7.70  
7.68  
7.44  
7.44  
7.42  
7.38  
7.37  
7.35  
7.26  
7.24  
7.24  
7.22  
7.21  
7.21  
6.95

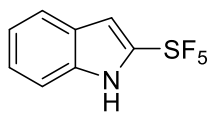**5a**<sup>1</sup>H-NMRCDCl<sub>3</sub>, 500 MHz, 298 K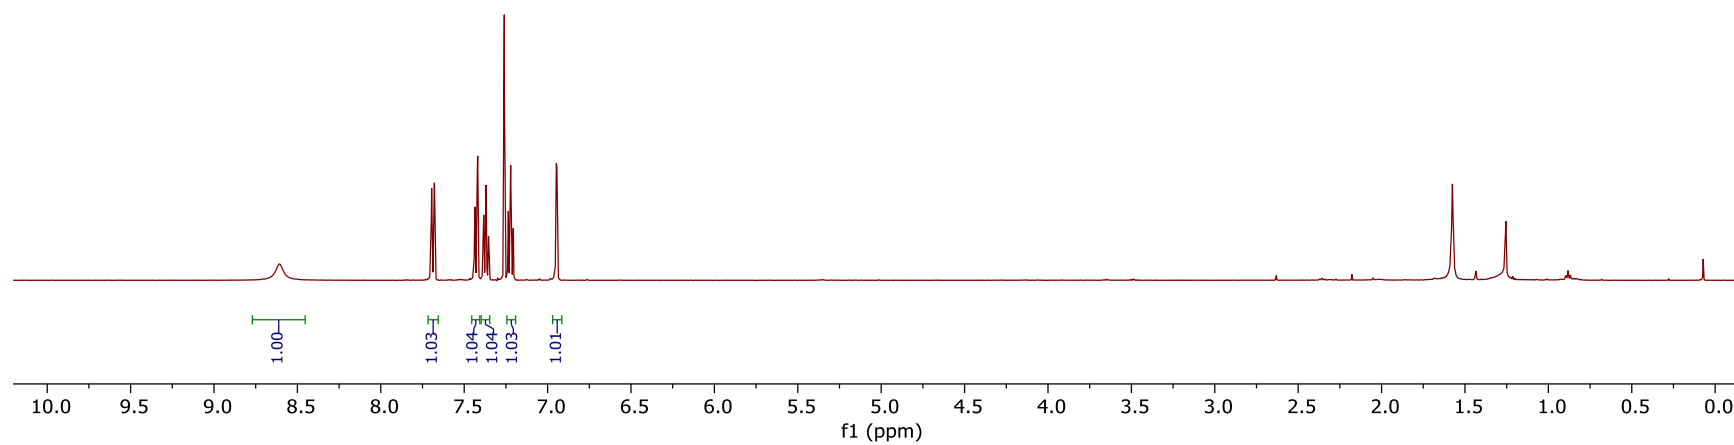

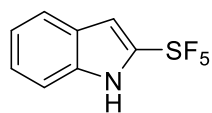**5a**<sup>13</sup>C-NMRCDCl<sub>3</sub>, 125 MHz, 298 K

144.07  
143.86  
143.66  
143.47  
143.29  
— 133.95  
125.58  
125.35  
122.58  
121.70  
— 111.80  
103.57  
103.53  
103.49  
103.45  
103.41  
77.41  
77.16  
76.91

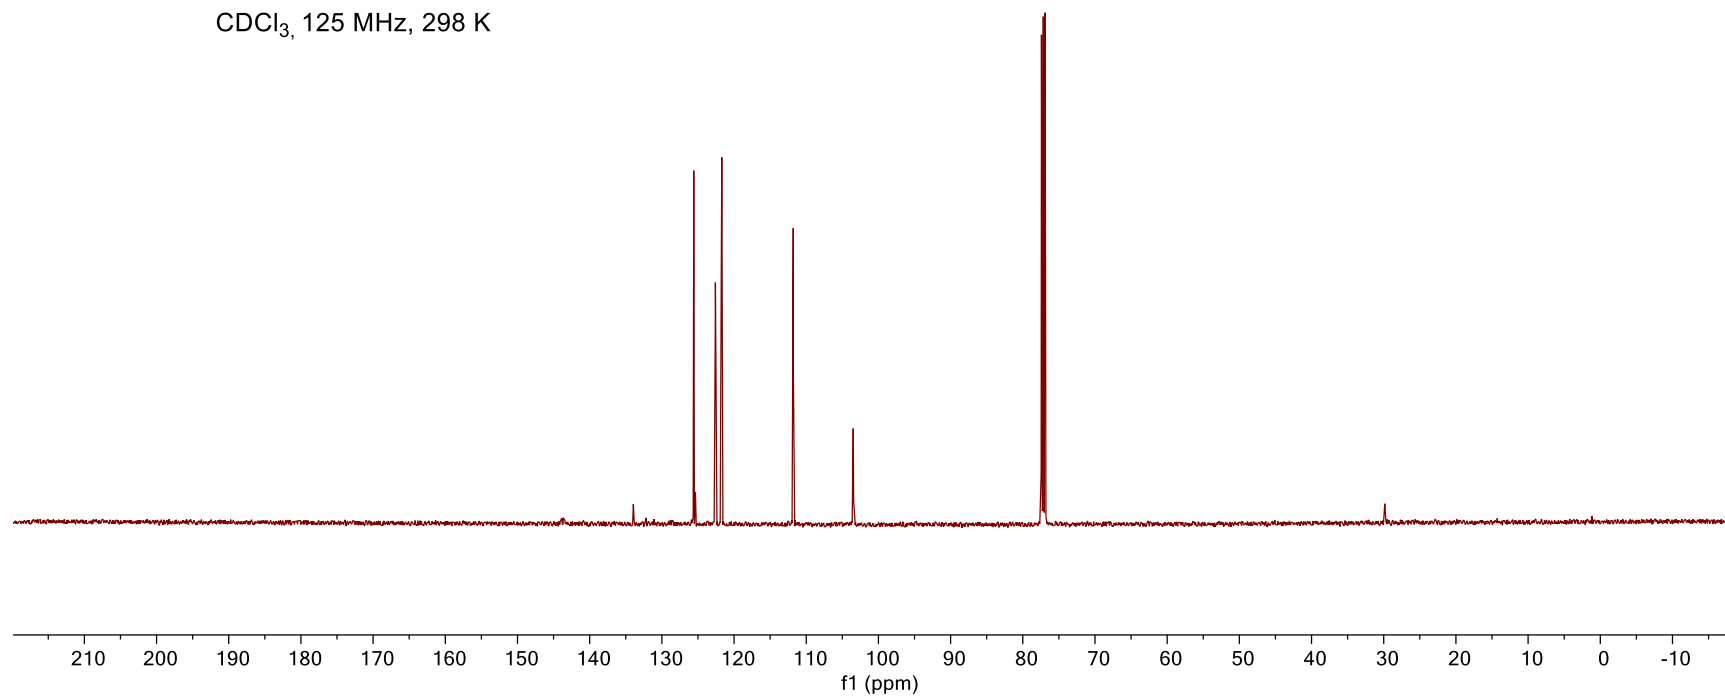

82.31  
81.98  
81.66  
81.33  
81.01

66.42  
66.10

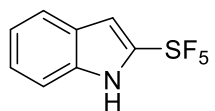**5a**

$^{19}\text{F}$ -NMR  
 $\text{CDCl}_3$ , 471 MHz, 298 K

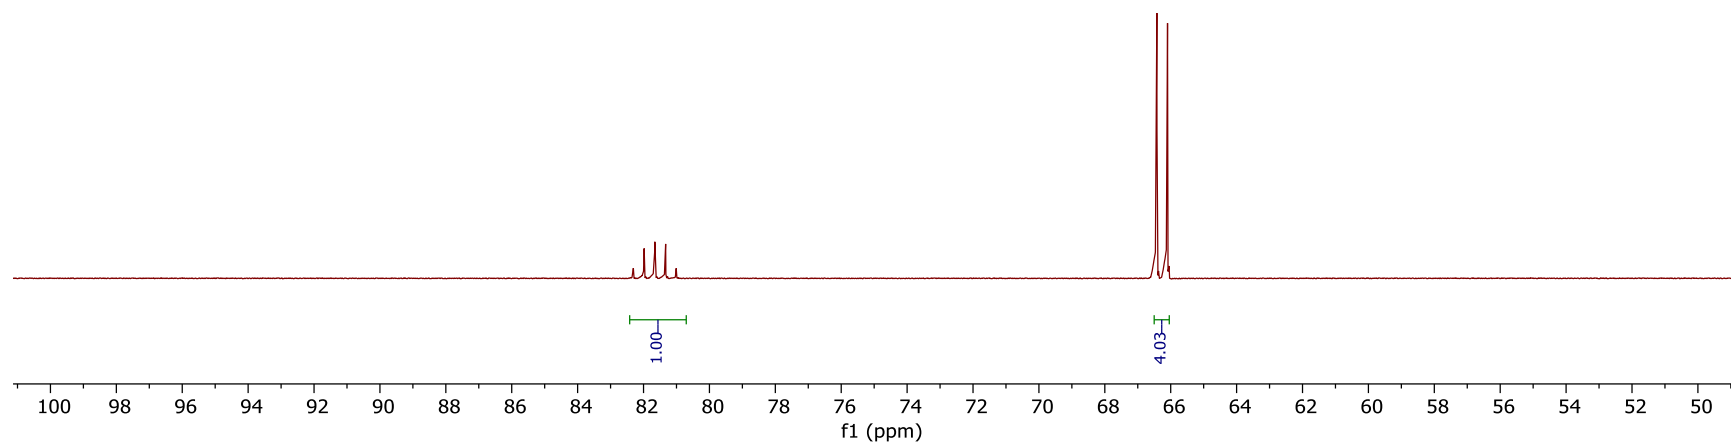

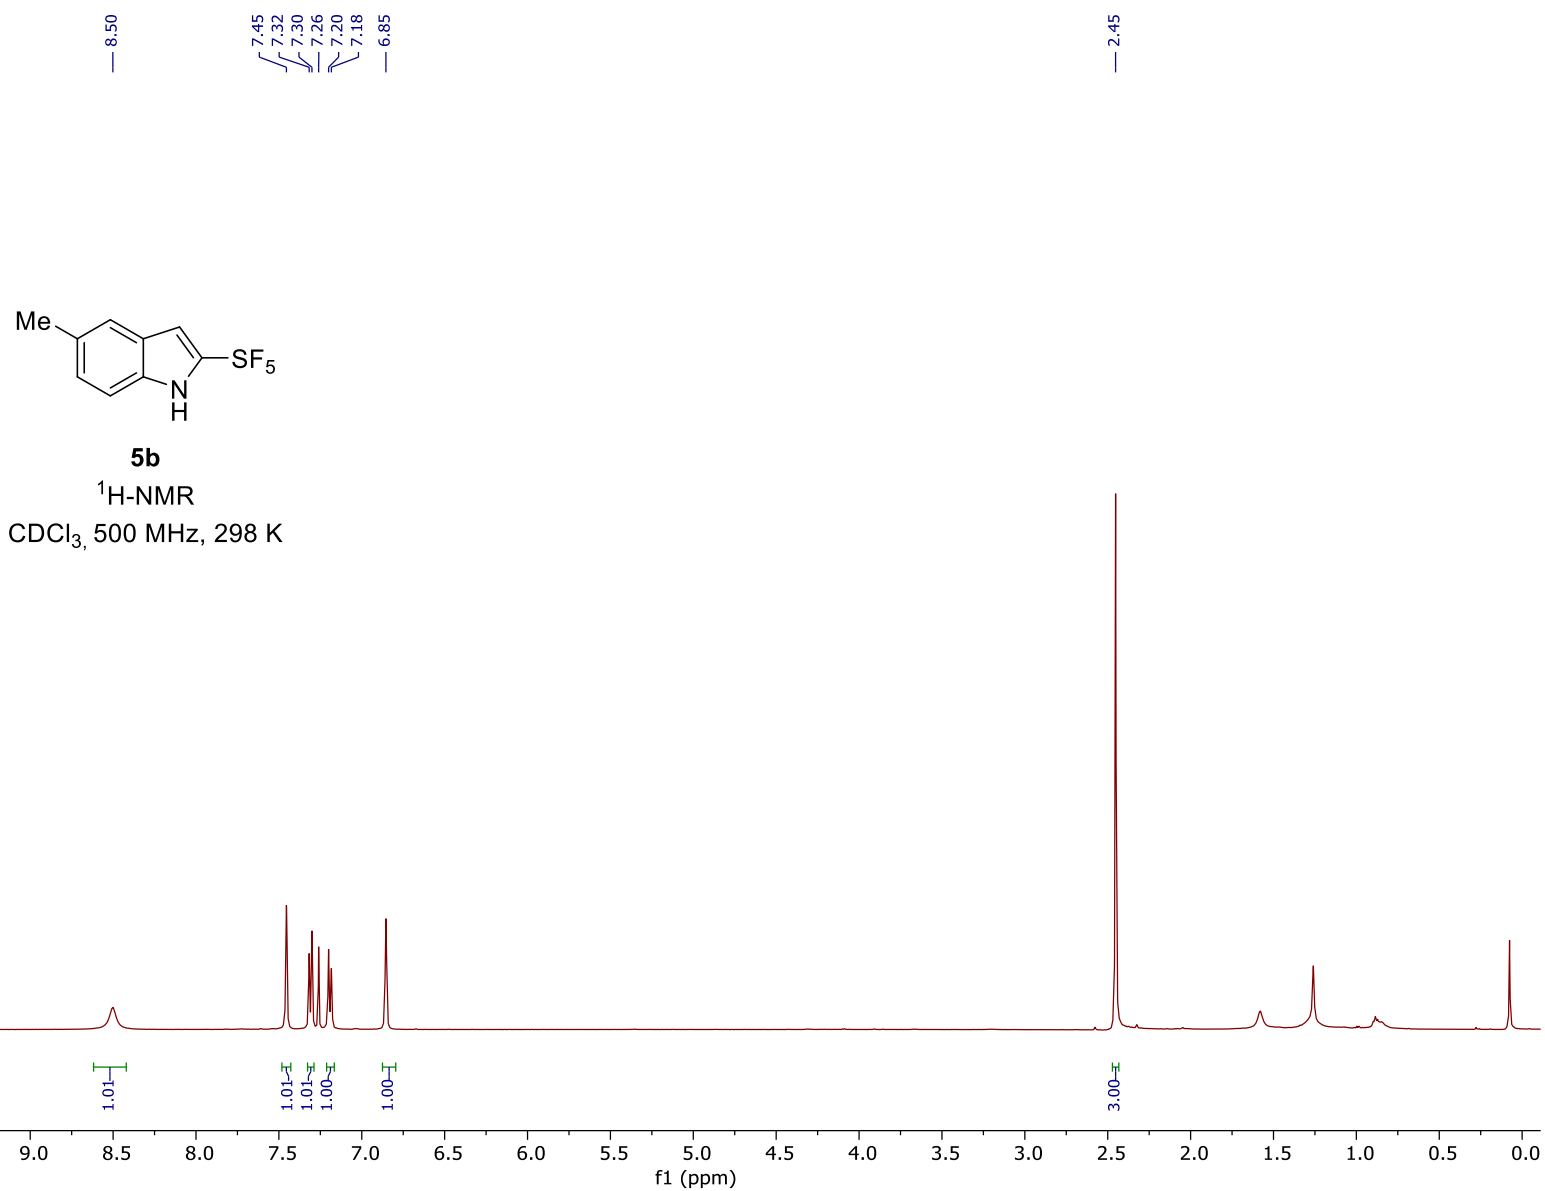

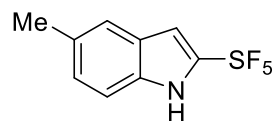**5b**<sup>13</sup>C-NMRCDCl<sub>3</sub>, 125 MHz, 298 K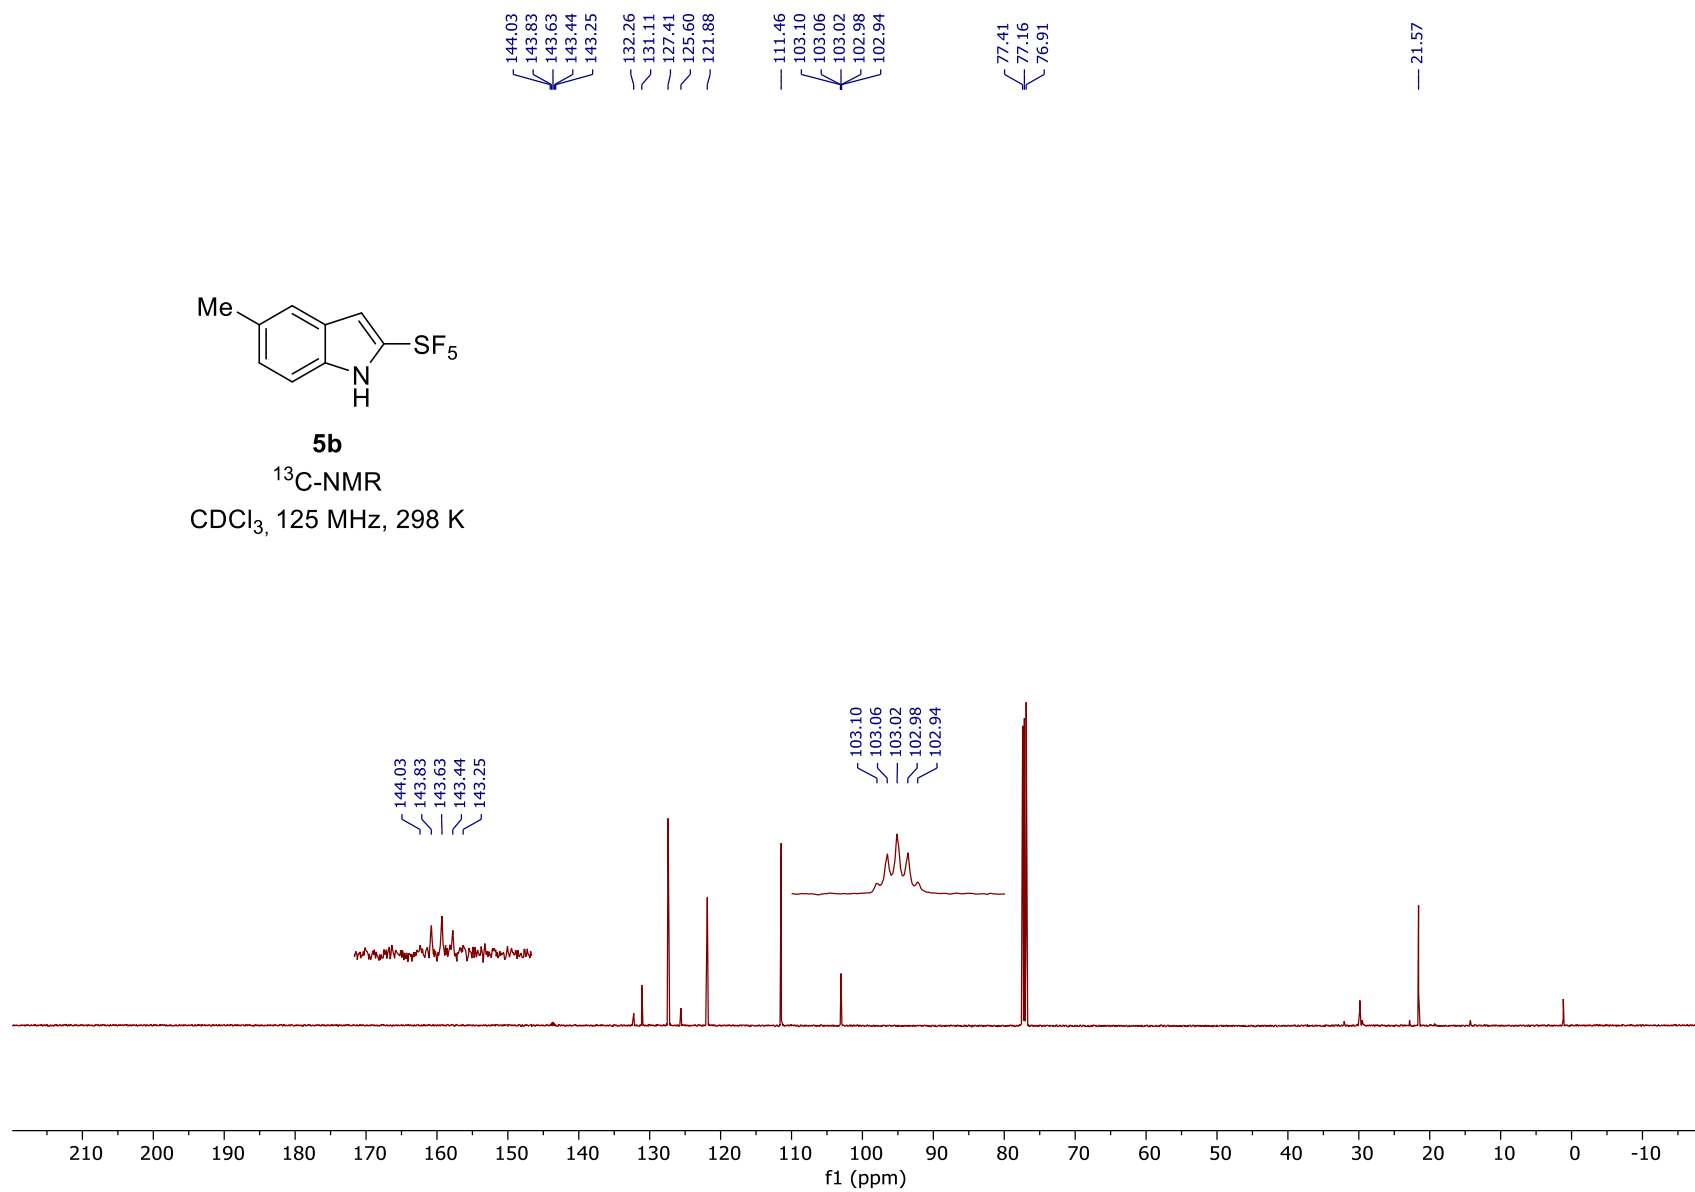

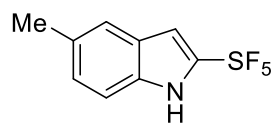**5b**<sup>19</sup>F-NMRCDCl<sub>3</sub>, 471 MHz, 298 K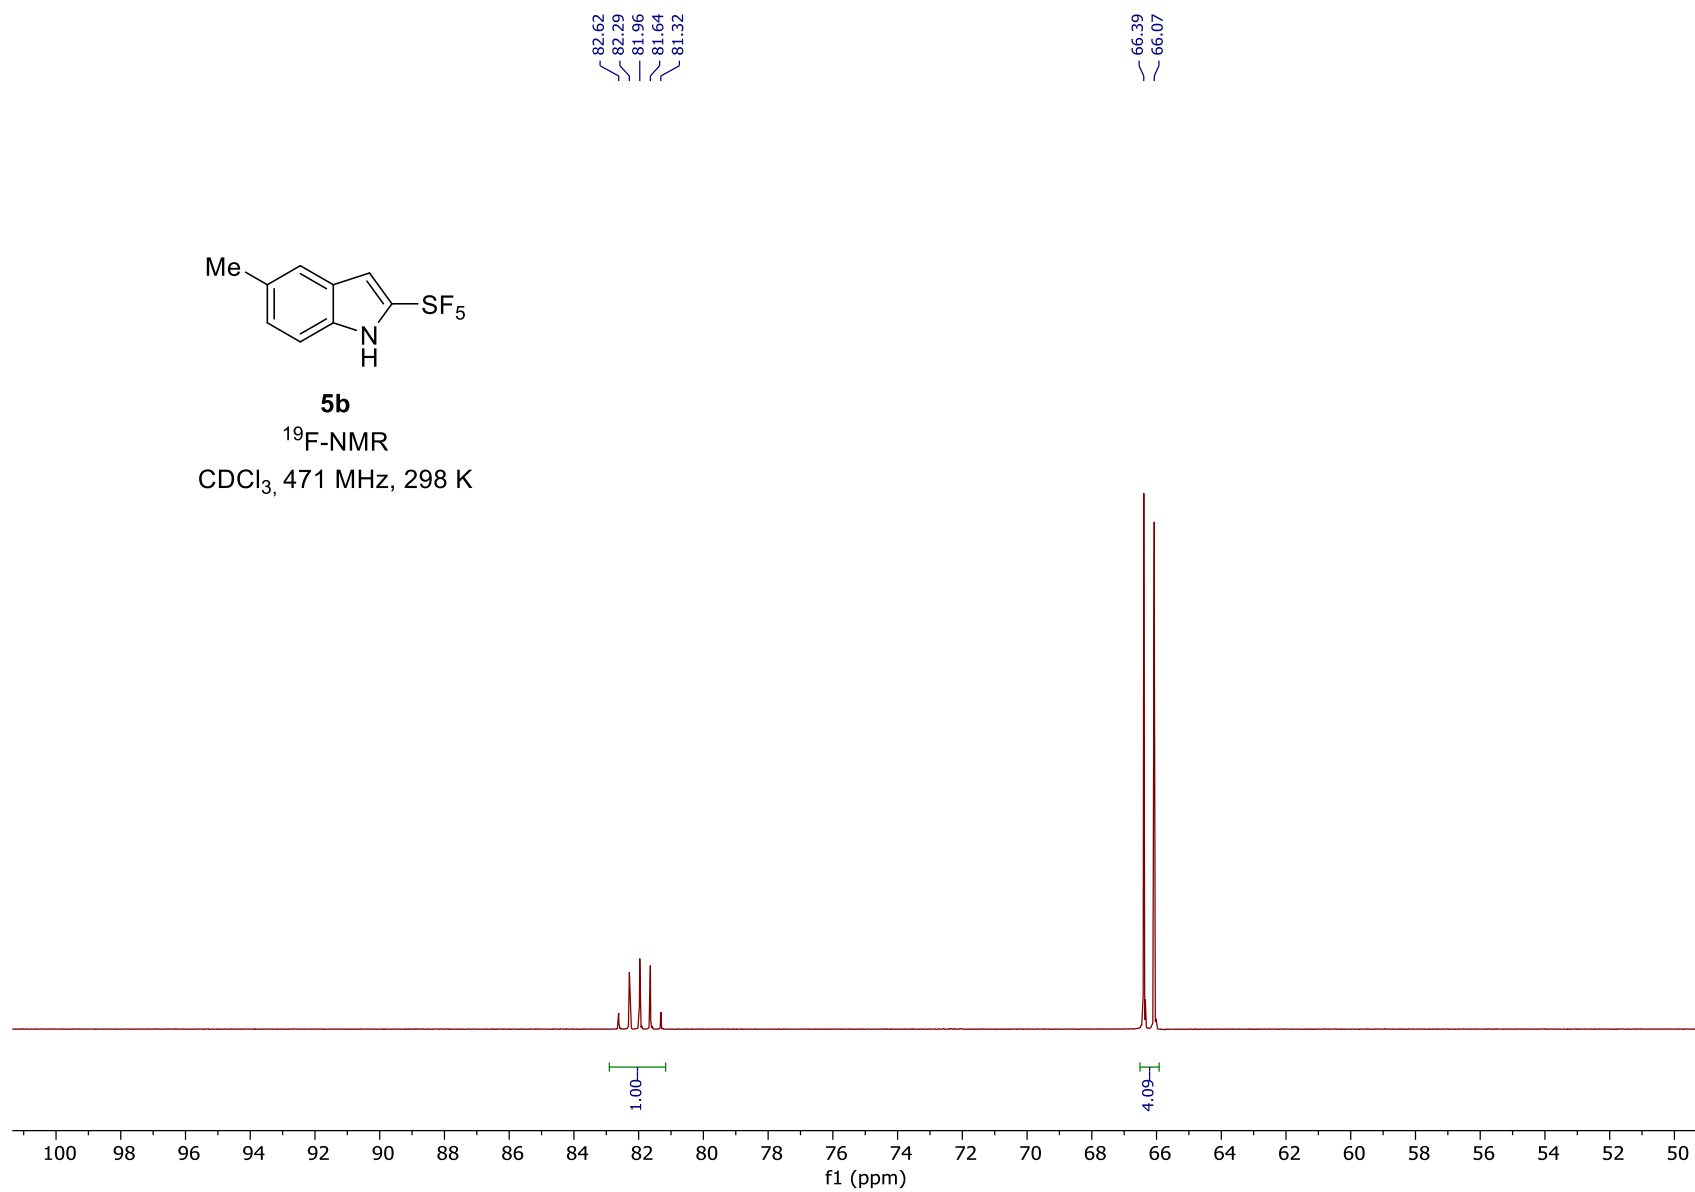

8.53  
7.32  
7.32  
7.30  
7.30  
7.30  
7.26  
7.08  
7.08  
7.04  
7.03  
7.02  
7.02  
6.86  
6.86  
3.85

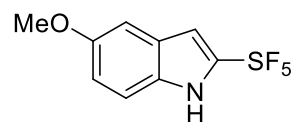**5c**<sup>1</sup>H-NMRCDCl<sub>3</sub>, 500 MHz, 298 K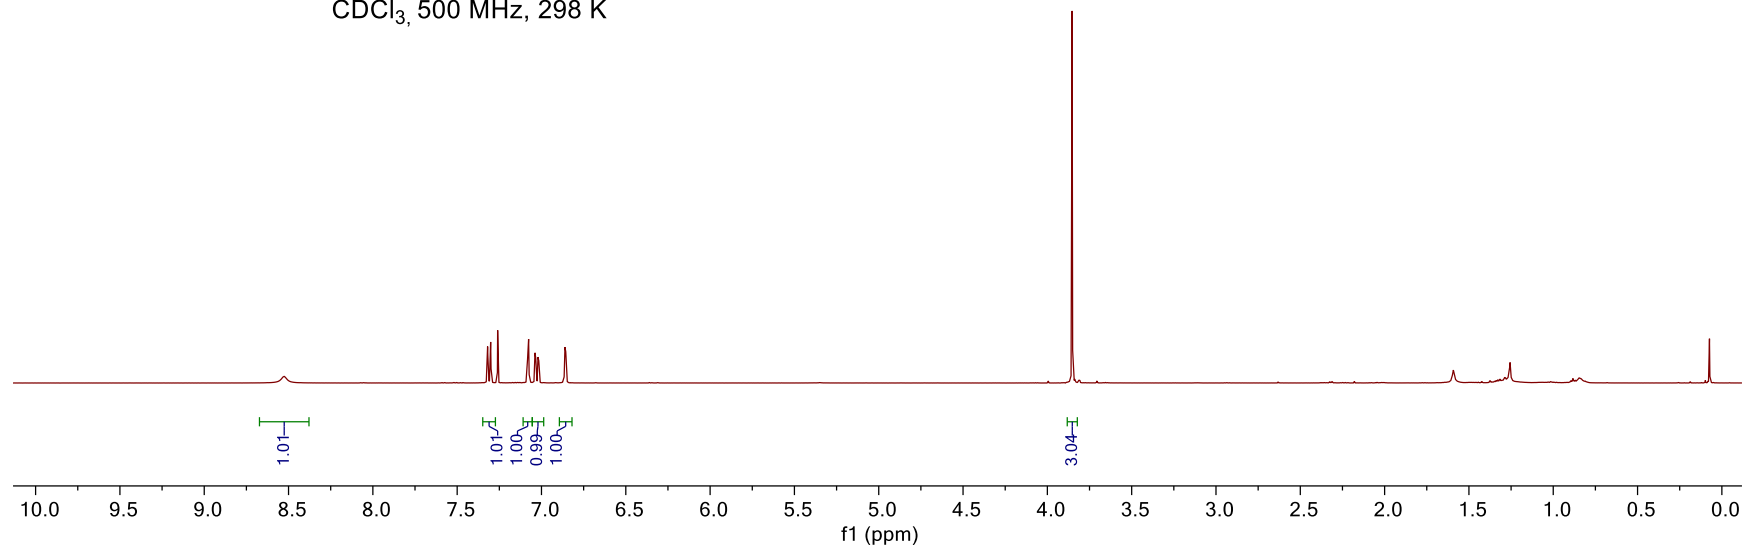



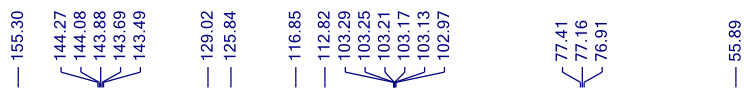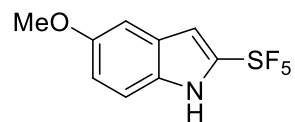**5c**<sup>13</sup>C-NMRCDCl<sub>3</sub>, 125 MHz, 298 K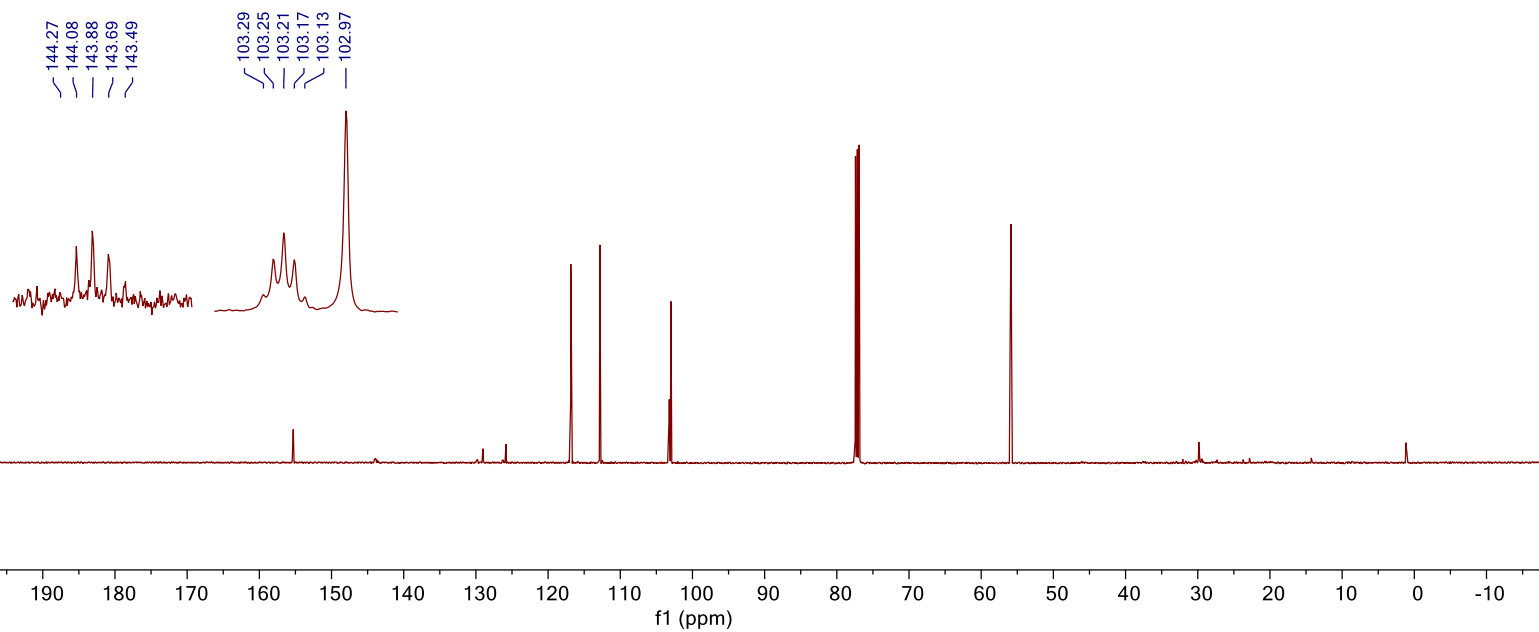

82.55  
82.24  
82.22  
81.91  
81.90  
81.89  
81.59  
81.57  
81.25

66.31  
65.98

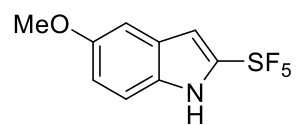**5c**<sup>19</sup>F-NMRCDCl<sub>3</sub>, 471 MHz, 298 K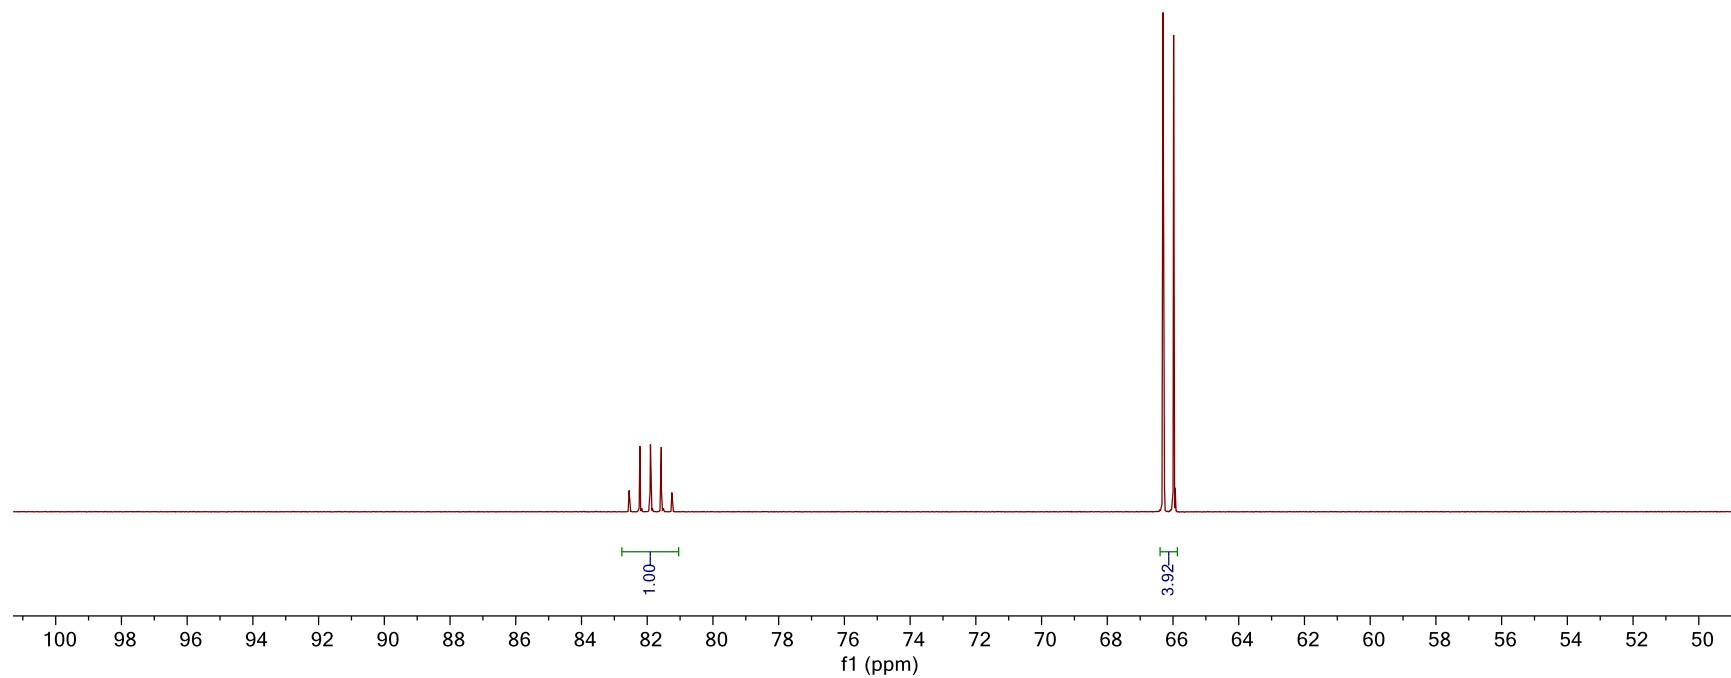

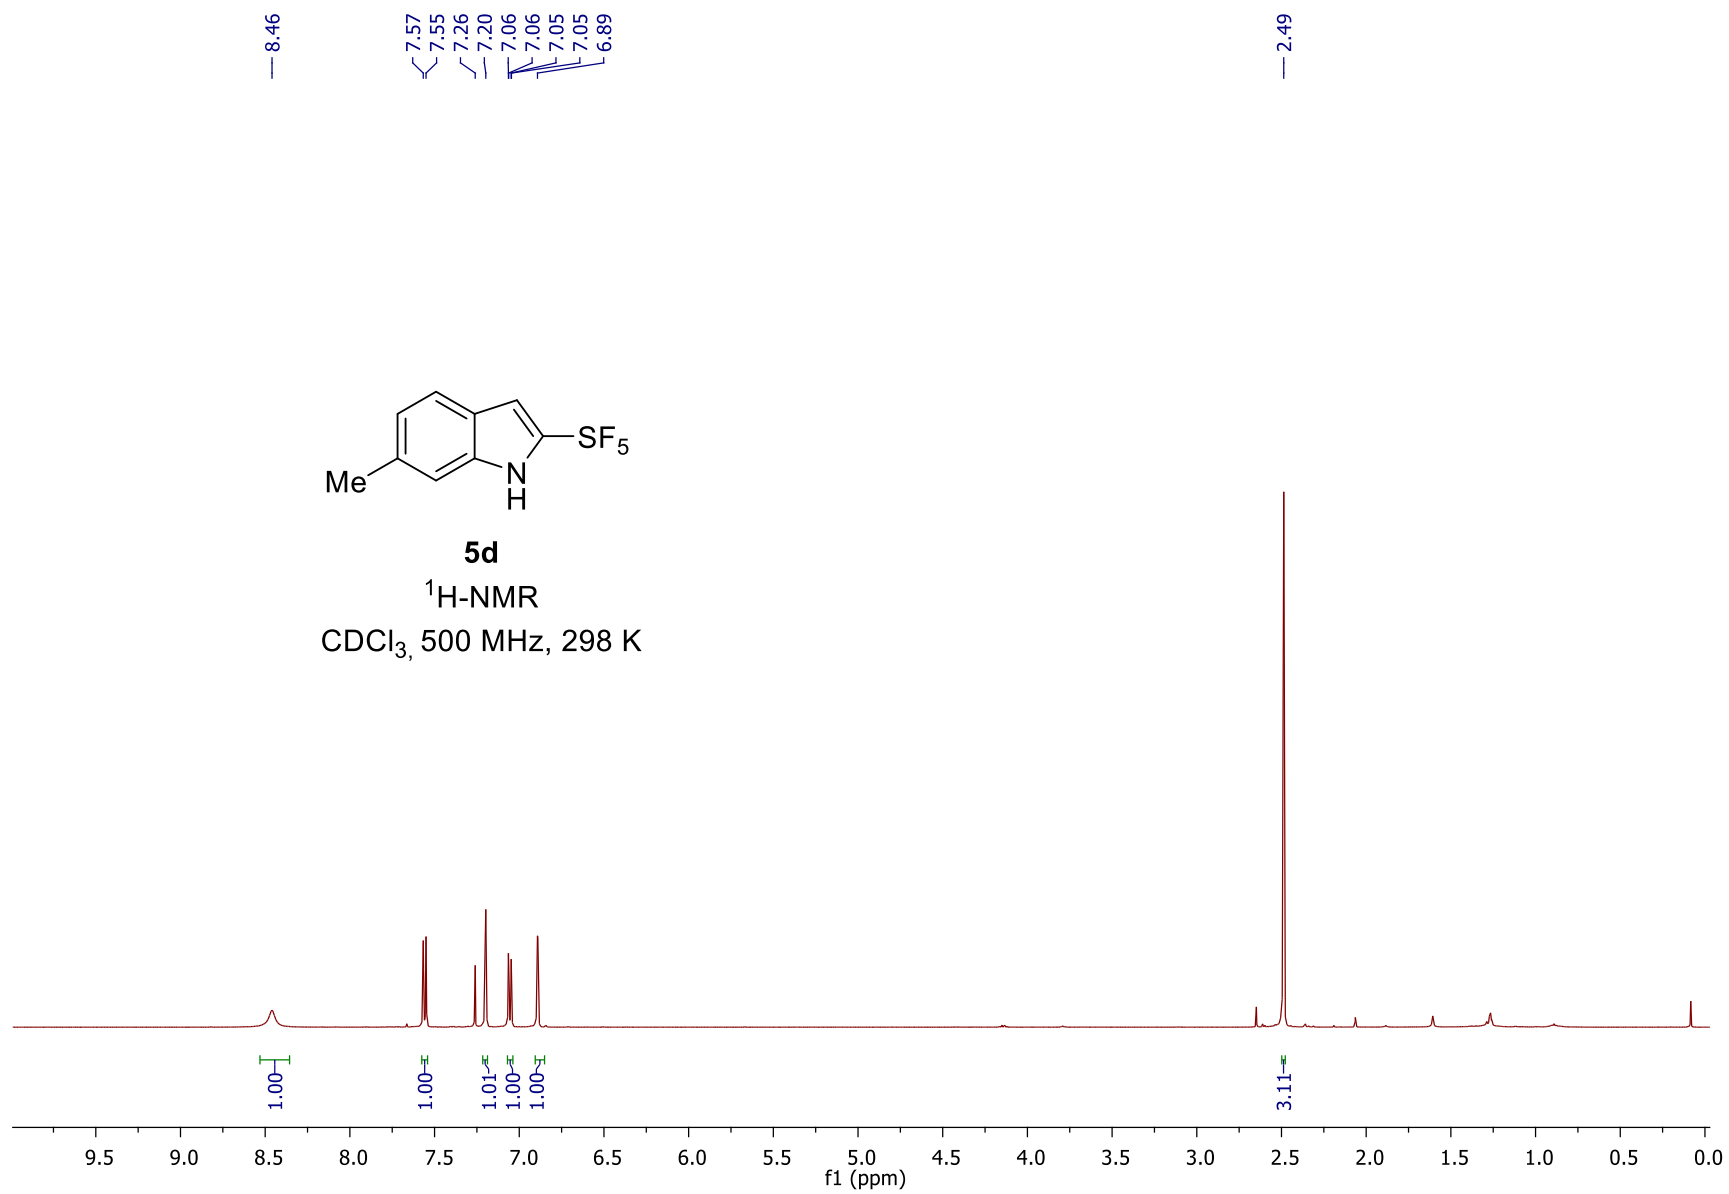

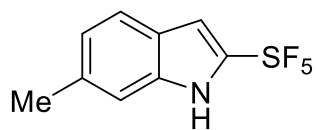**5d**<sup>13</sup>C-NMRCDCl<sub>3</sub>, 125 MHz, 298 K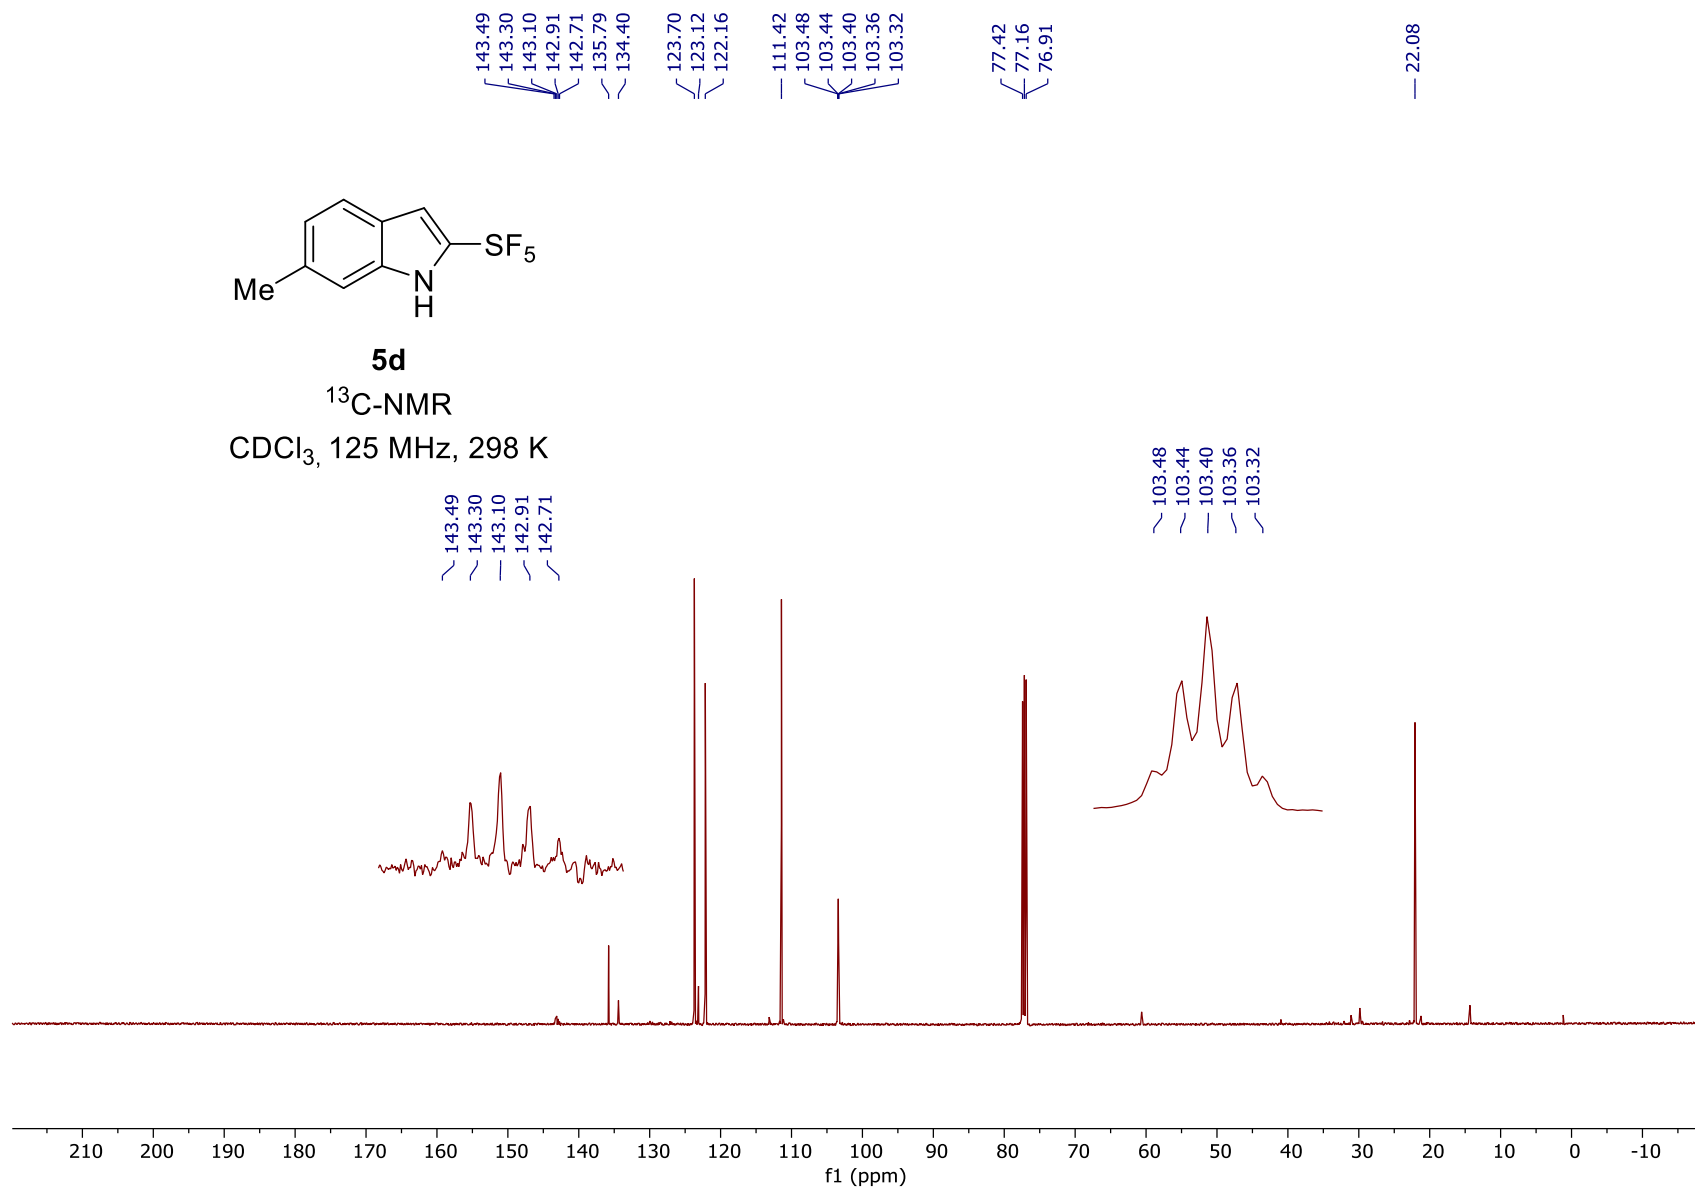

82.81  
82.48  
82.16  
81.83  
81.51

66.55  
66.22

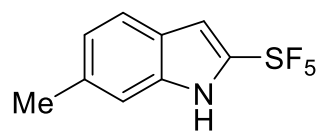**5d**<sup>19</sup>F-NMRCDCl<sub>3</sub>, 471 MHz, 298 K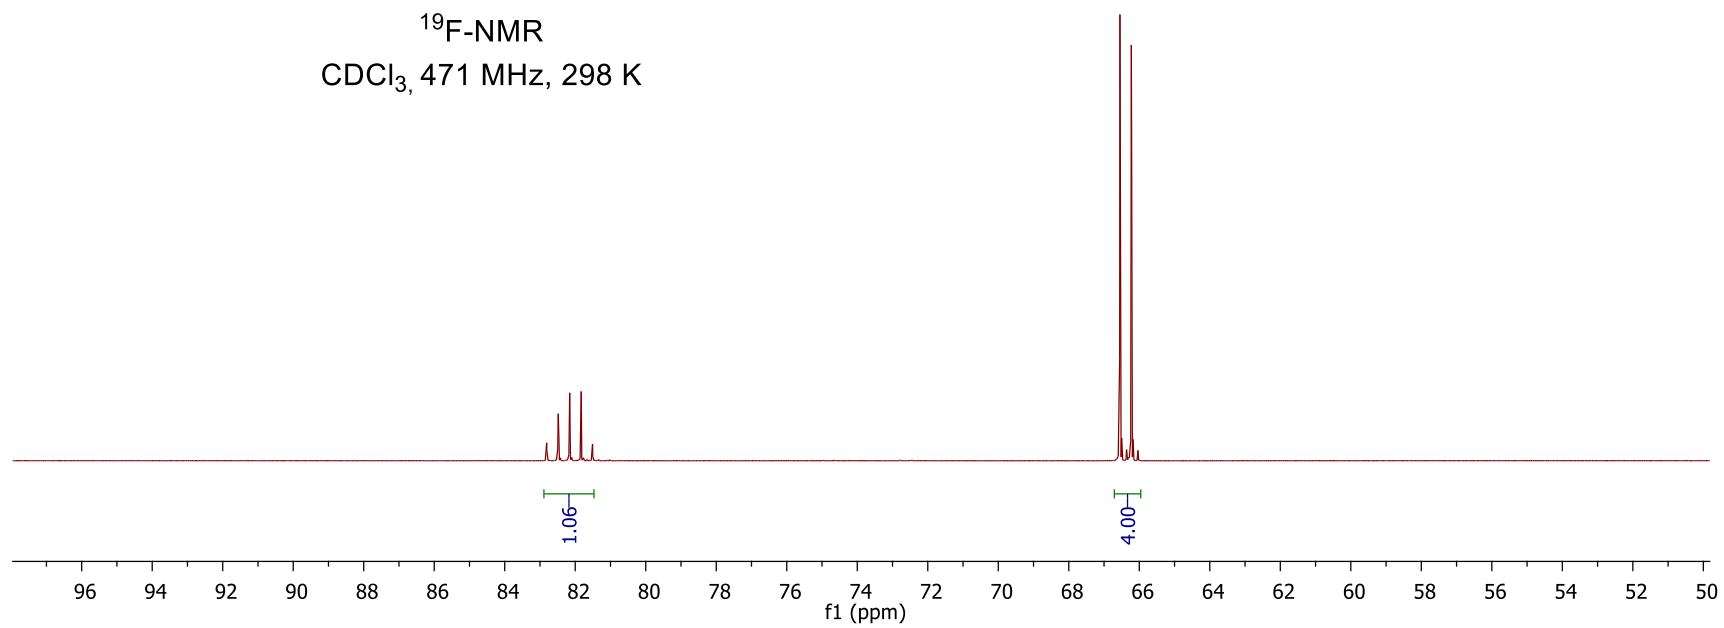

8.68  
8.67  
7.66  
7.37  
7.35  
7.33  
7.31  
7.26  
6.88  
6.88

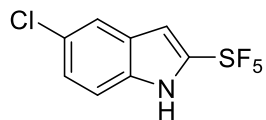

**5e**

<sup>1</sup>H-NMR

CDCl<sub>3</sub>, 500 MHz, 298 K

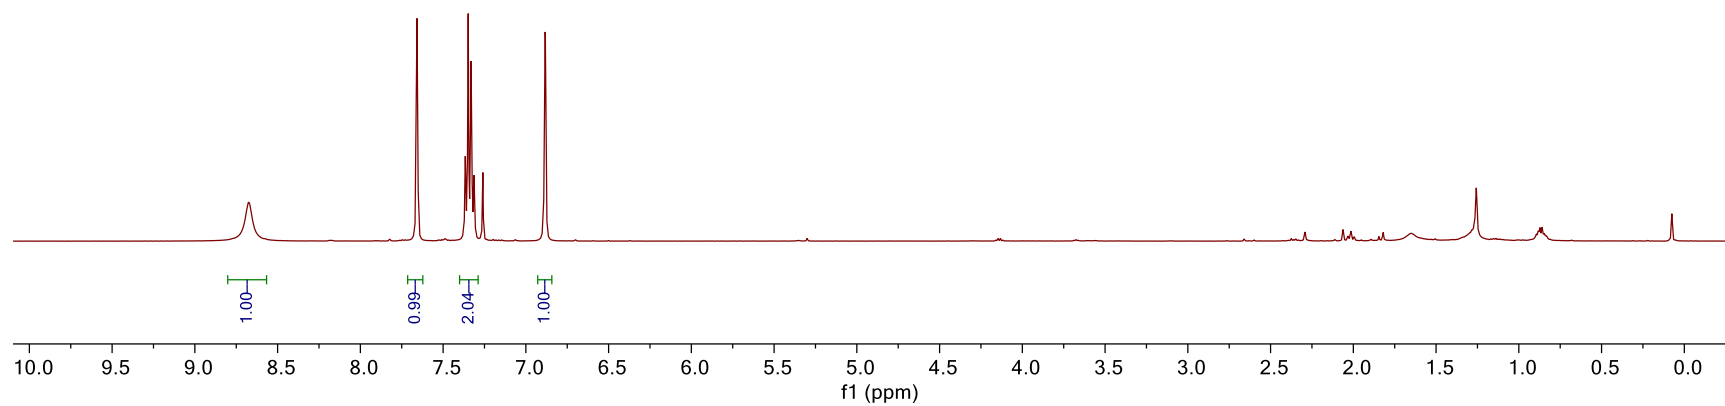

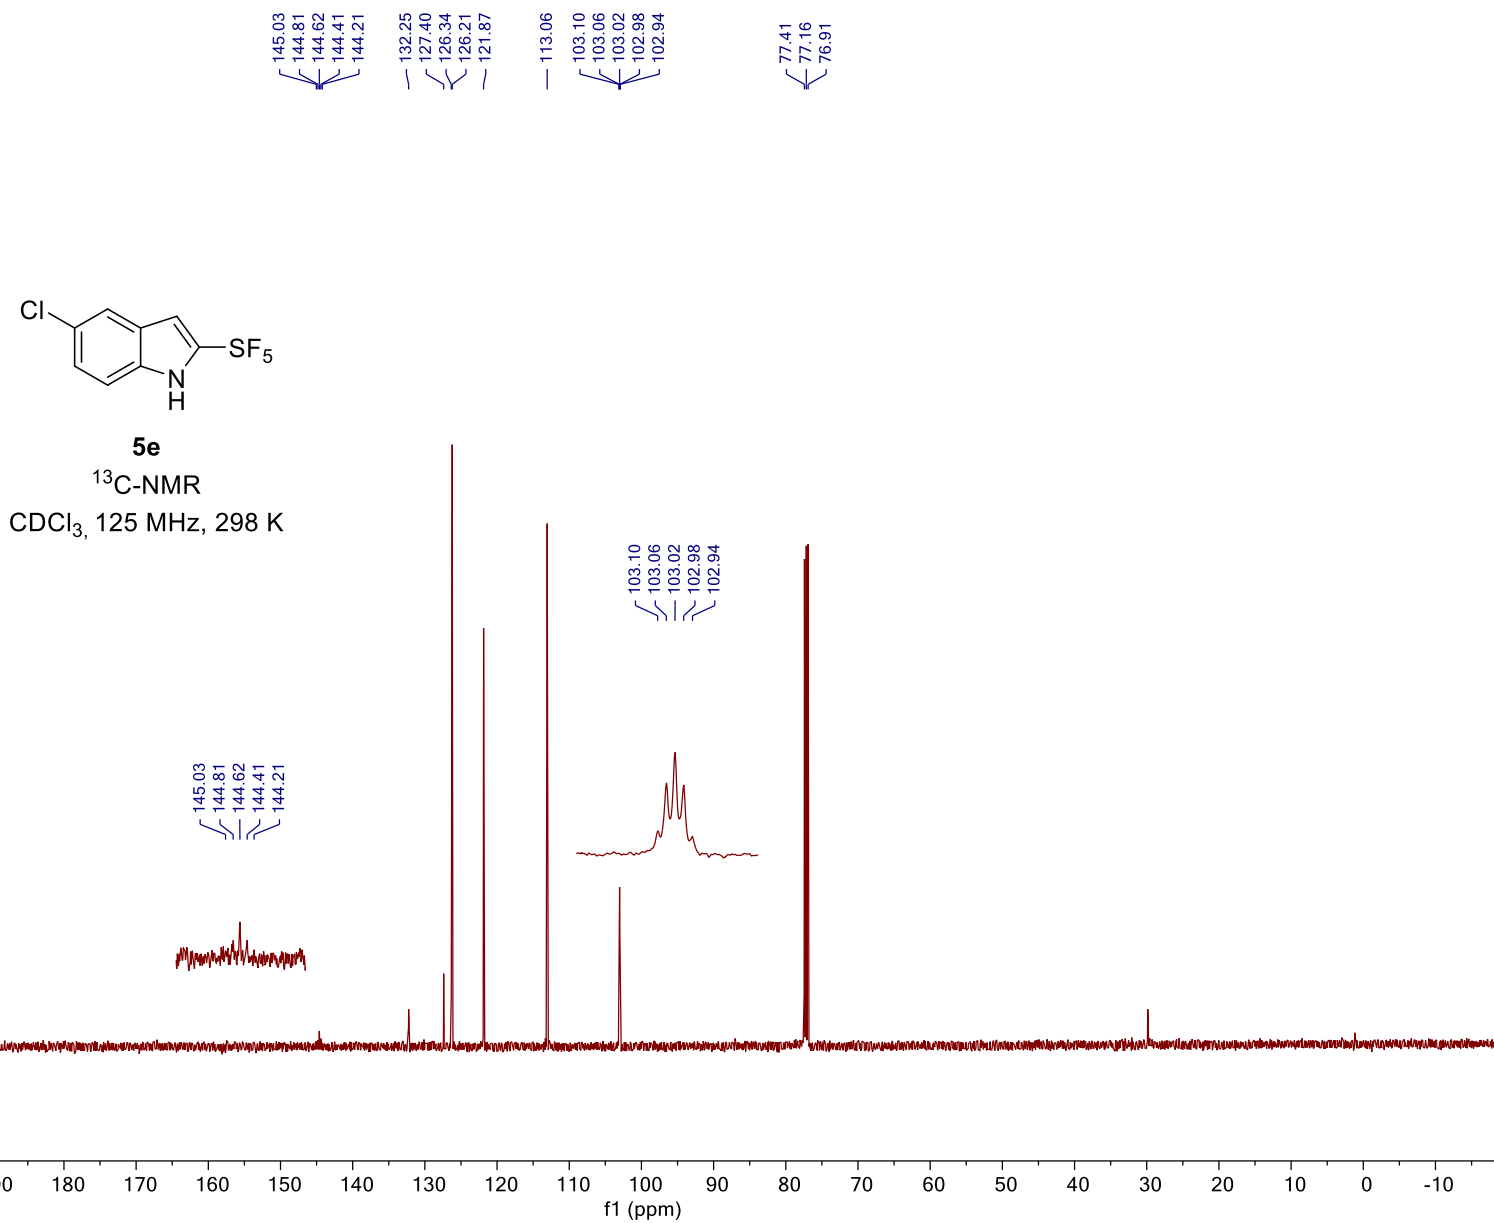

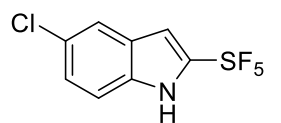**5e**<sup>19</sup>F-NMRCDCl<sub>3</sub>, 471 MHz, 298 K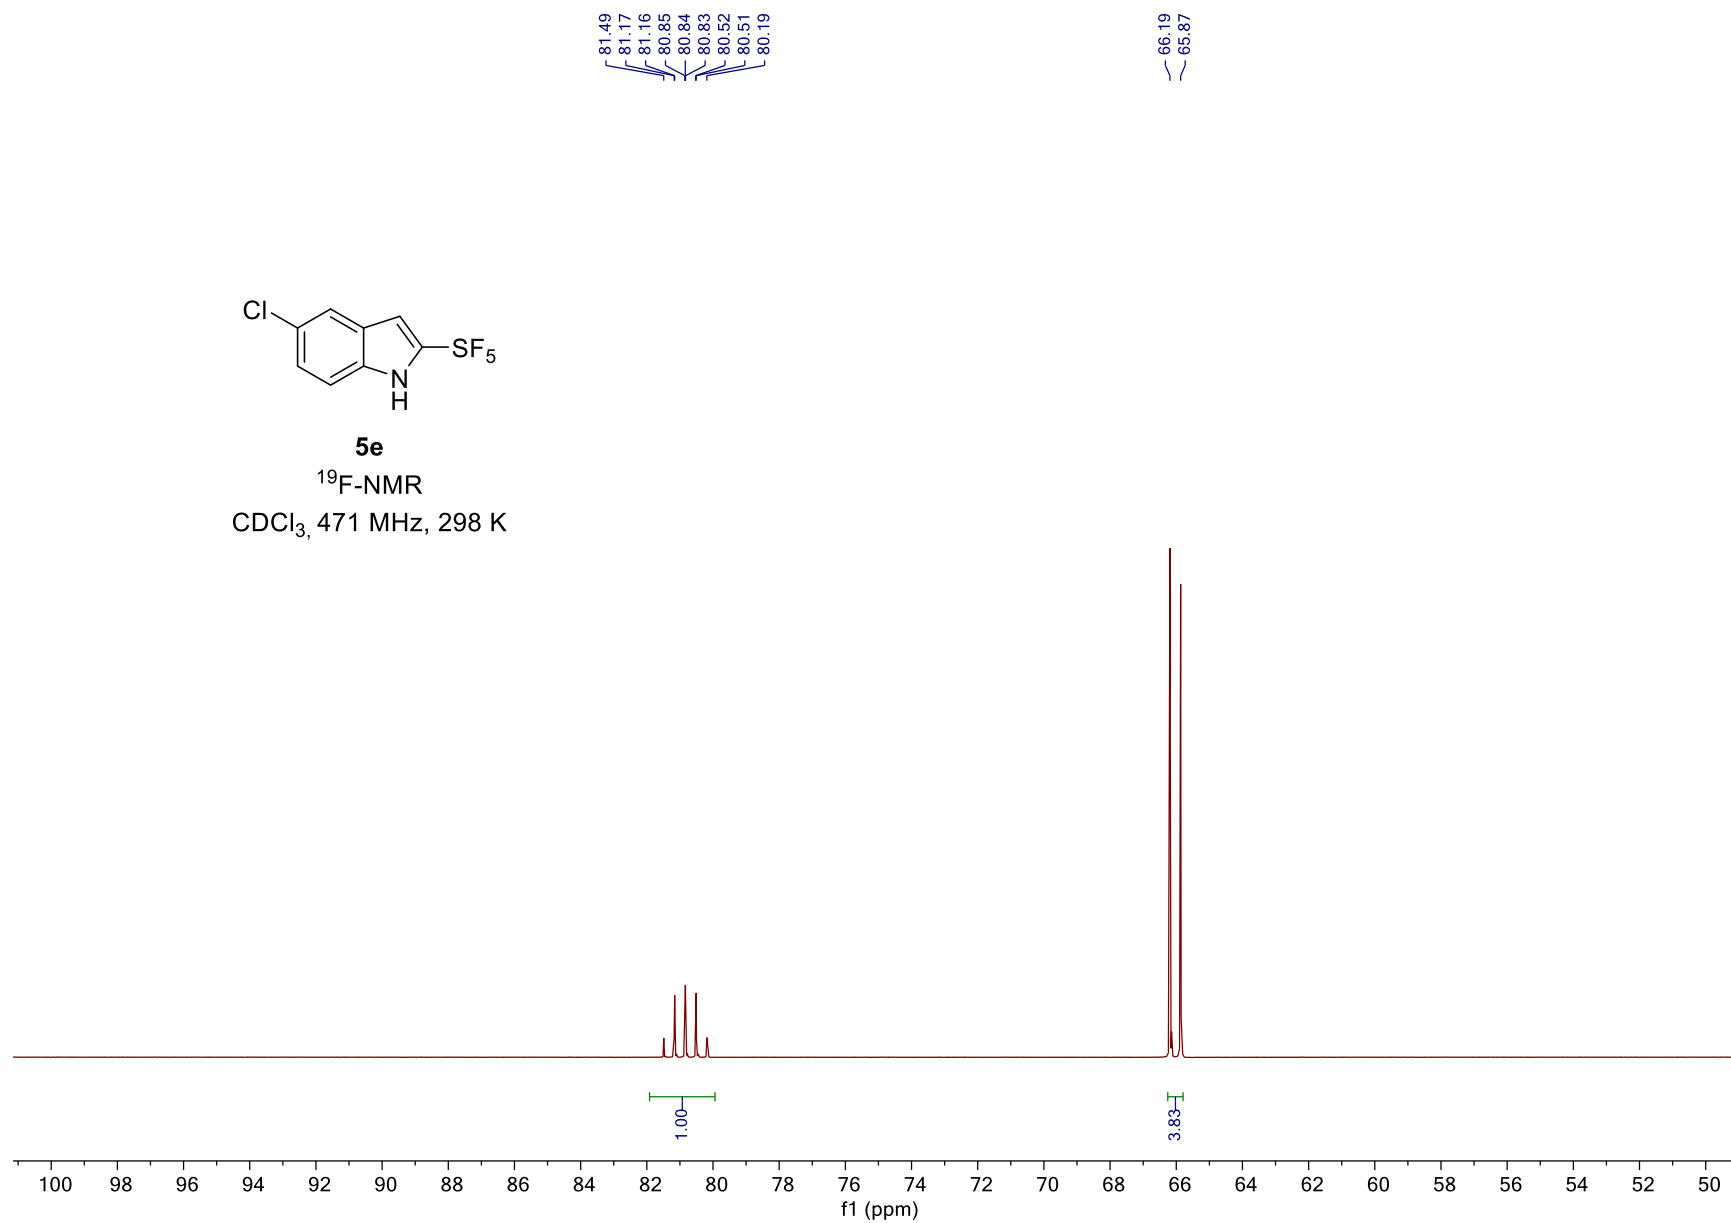



— 8.98  
— 8.46  
8.07  
8.05  
8.05  
7.47  
7.45  
7.26  
7.03  
— 3.95

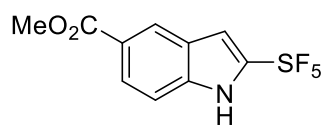

**5f**

<sup>1</sup>H-NMR

CDCl<sub>3</sub>, 500 MHz, 298 K

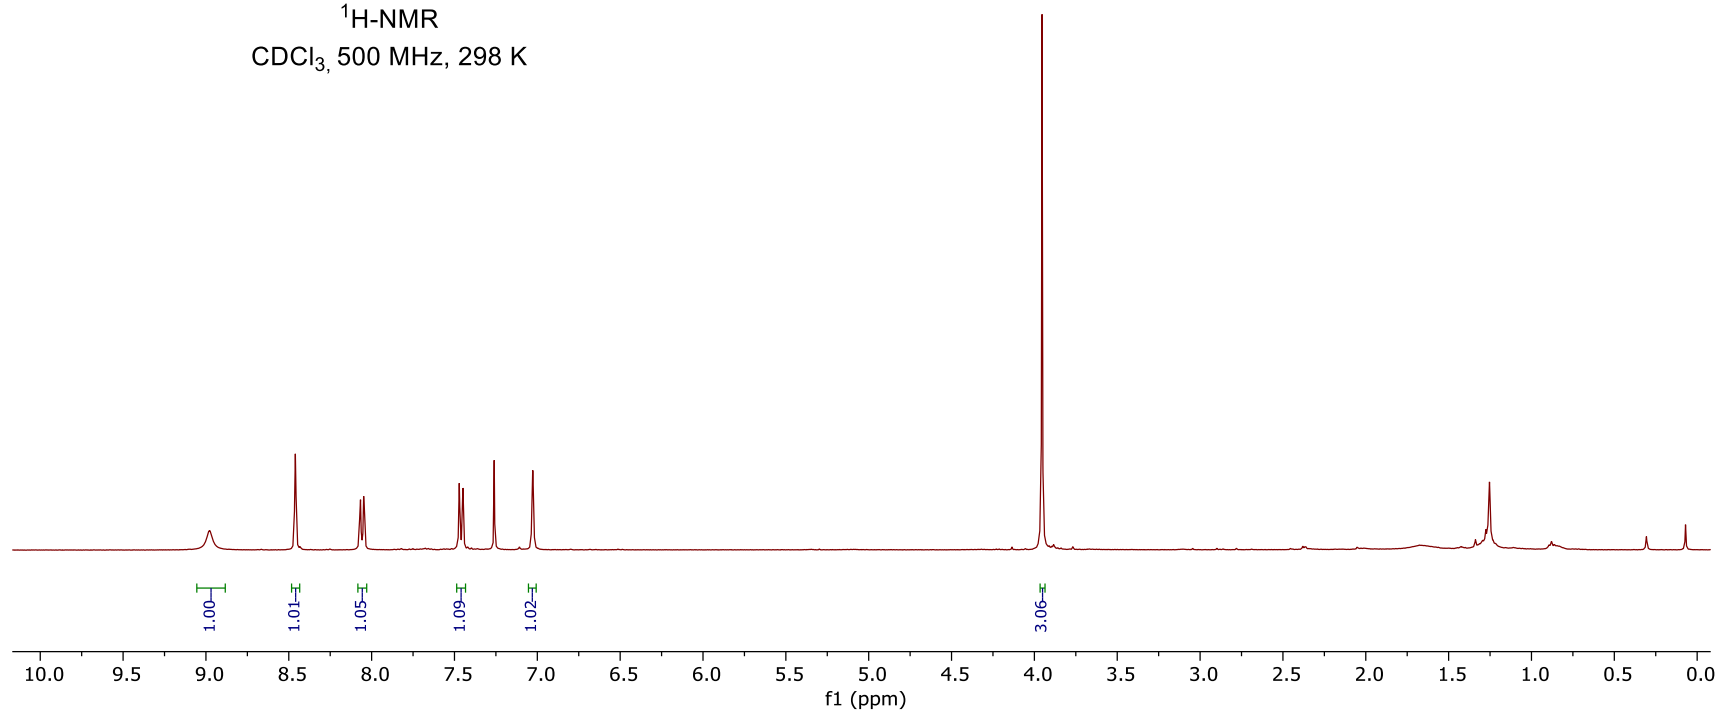

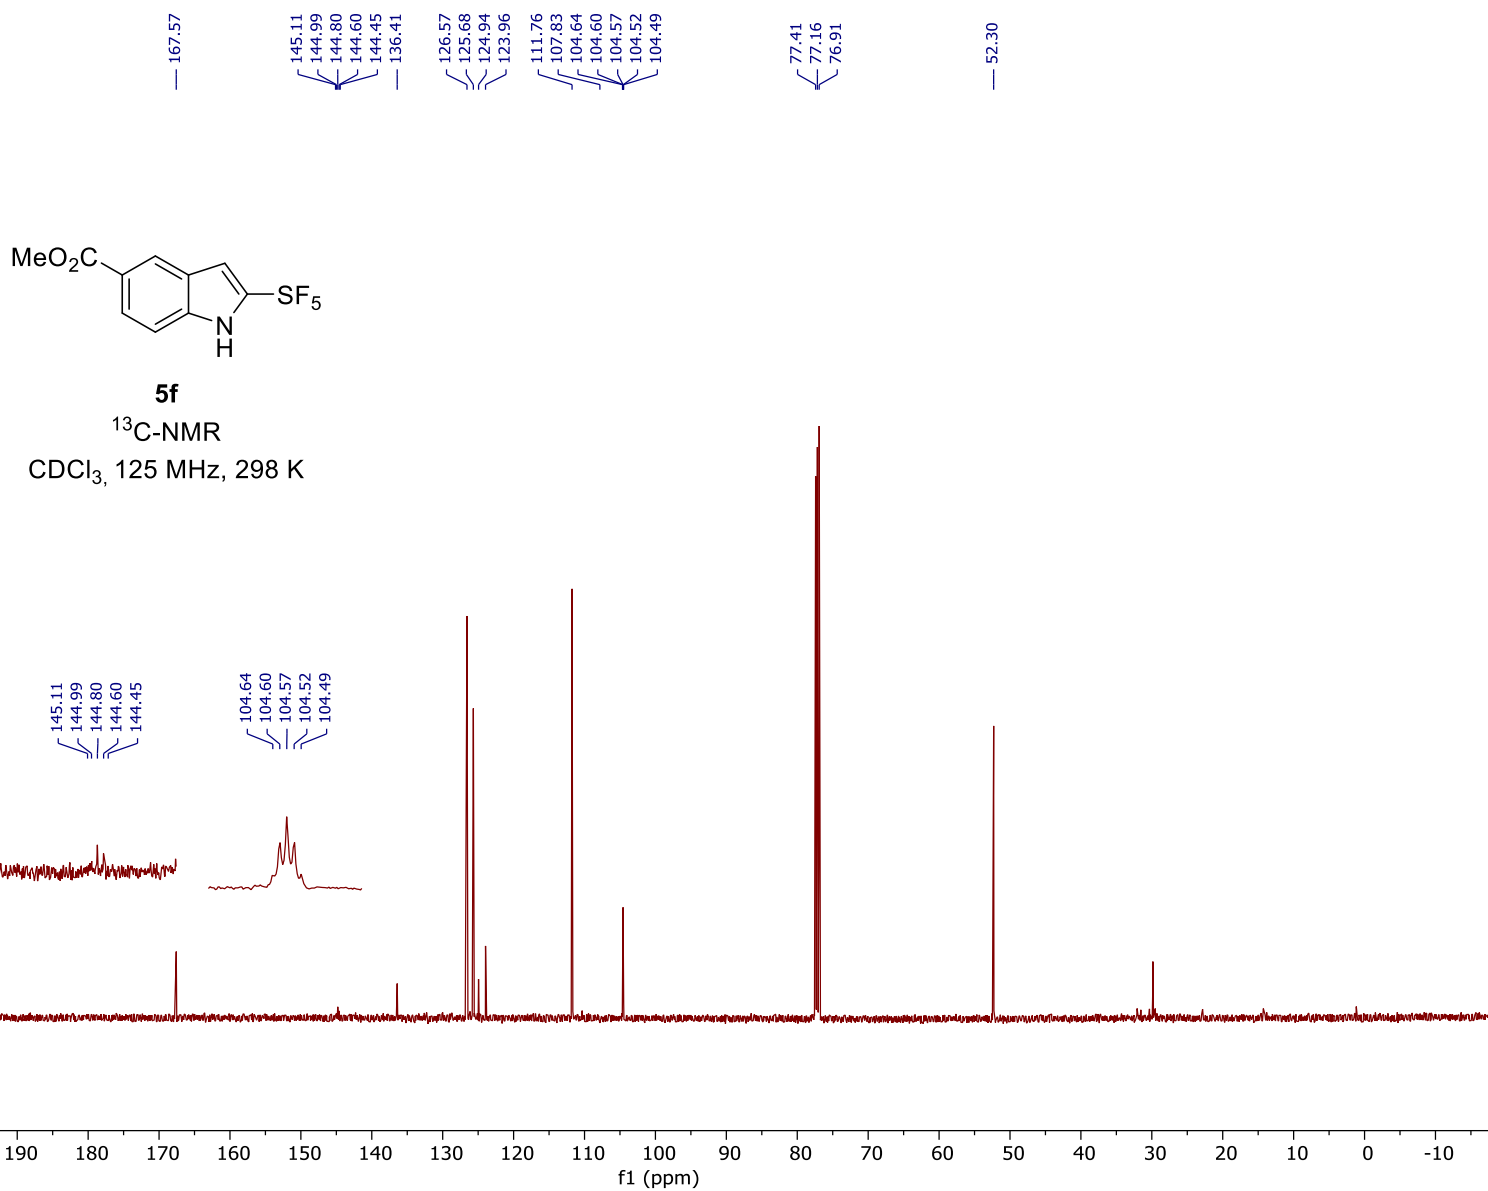

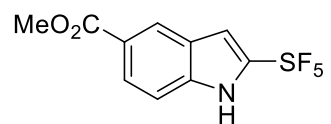**5f**<sup>19</sup>F-NMRCDCl<sub>3</sub>, 471 MHz, 298 K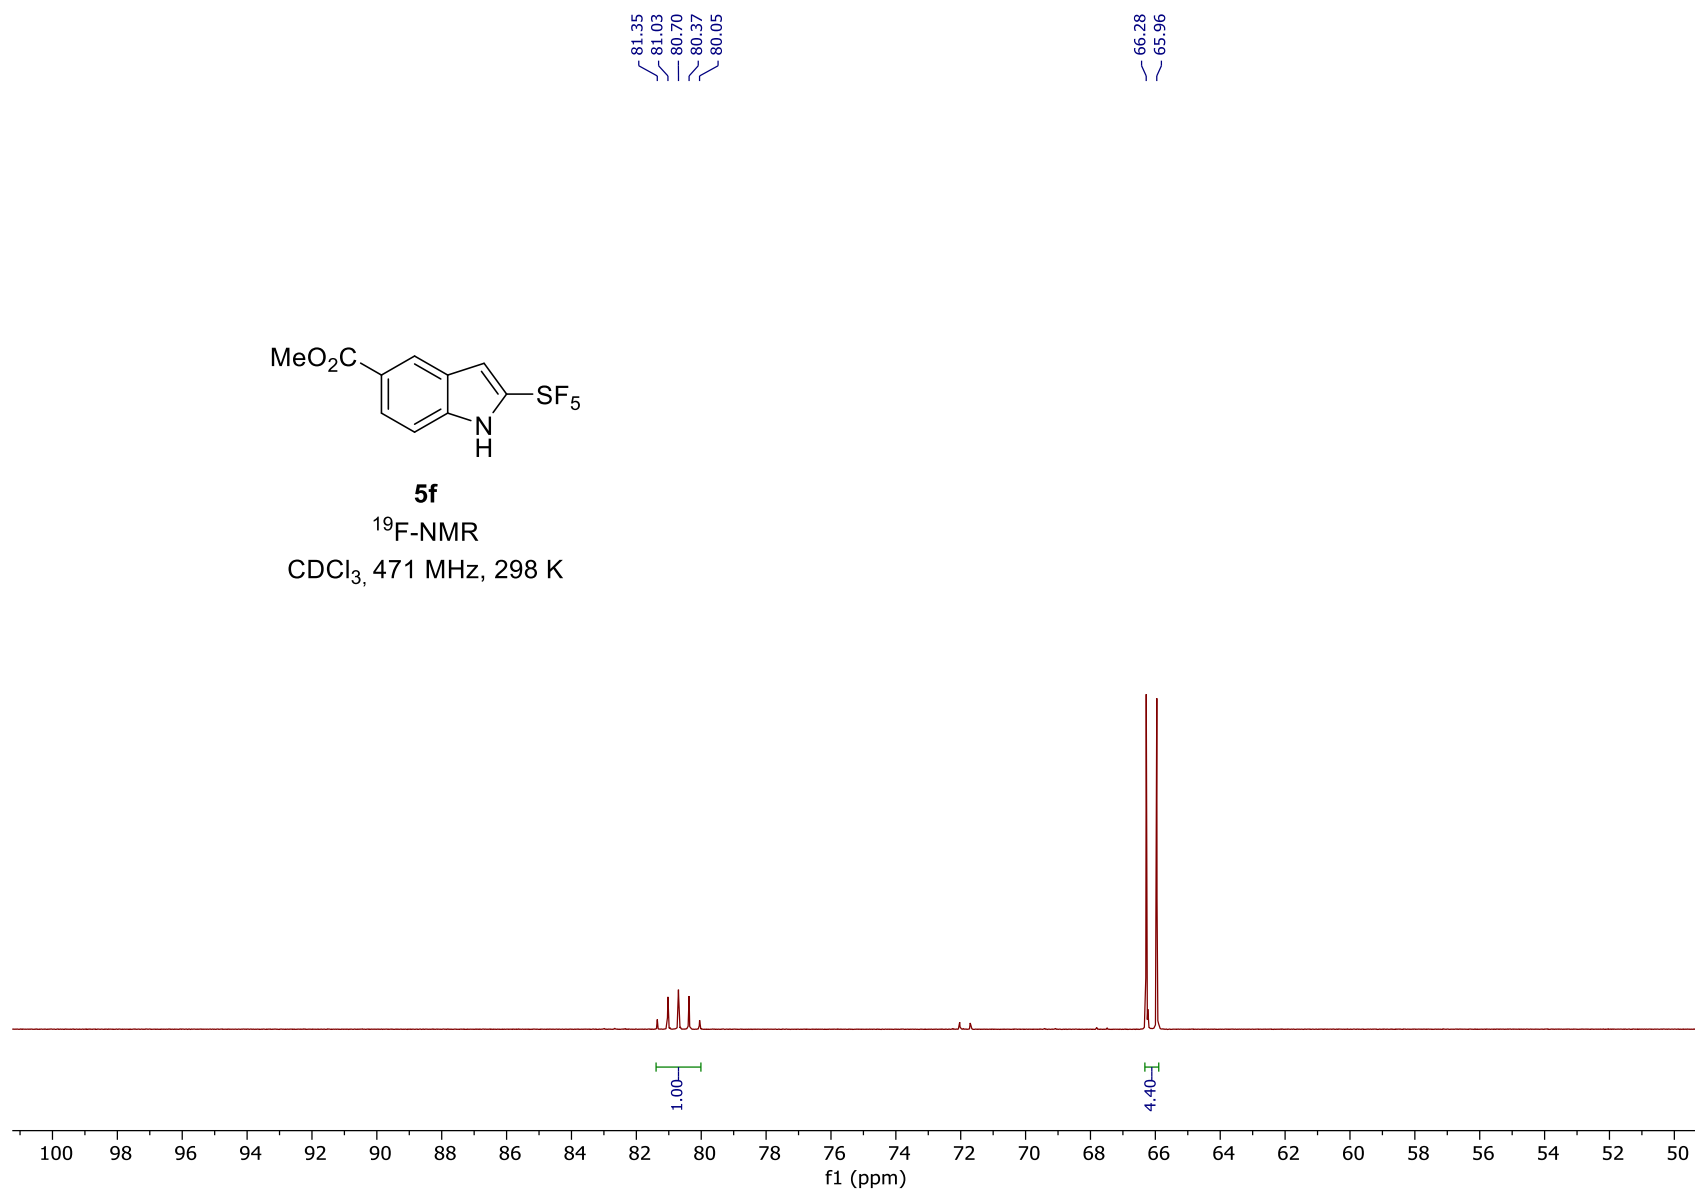

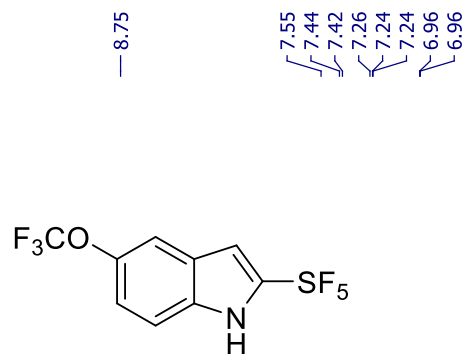**5g**<sup>1</sup>H-NMRCDCl<sub>3</sub>, 500 MHz, 298 K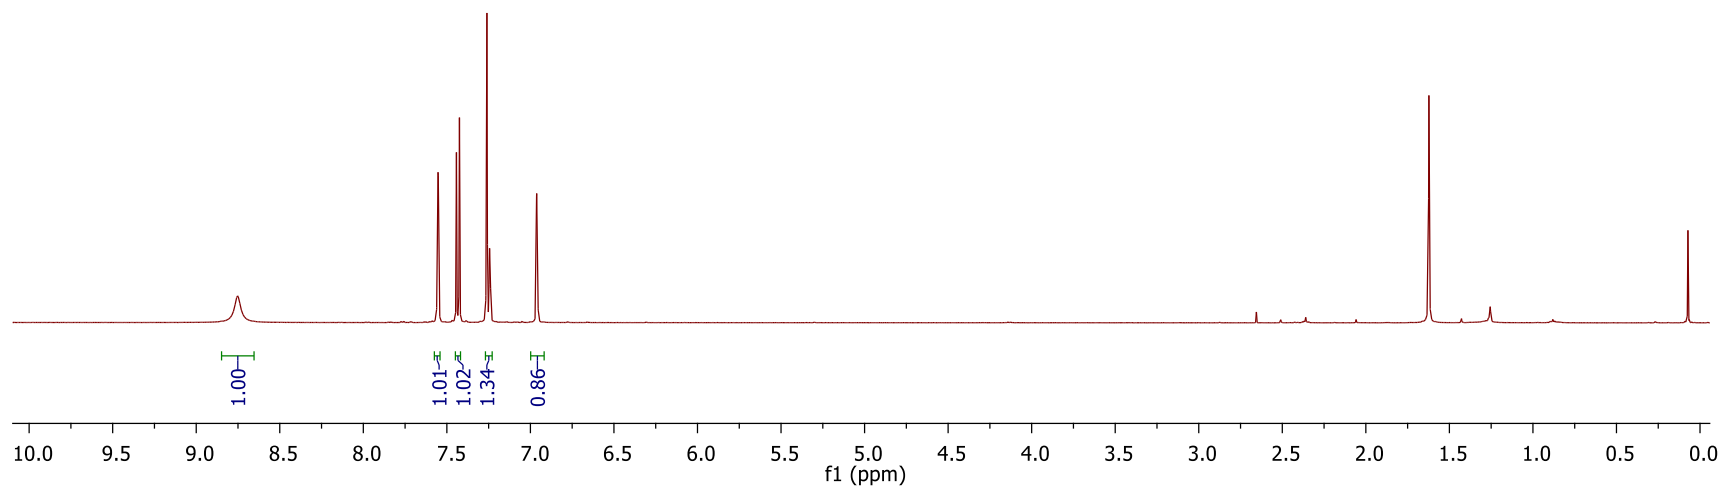

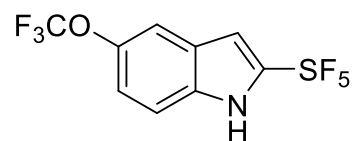**5g**<sup>13</sup>C-NMRCDCl<sub>3</sub>, 125 MHz, 298 K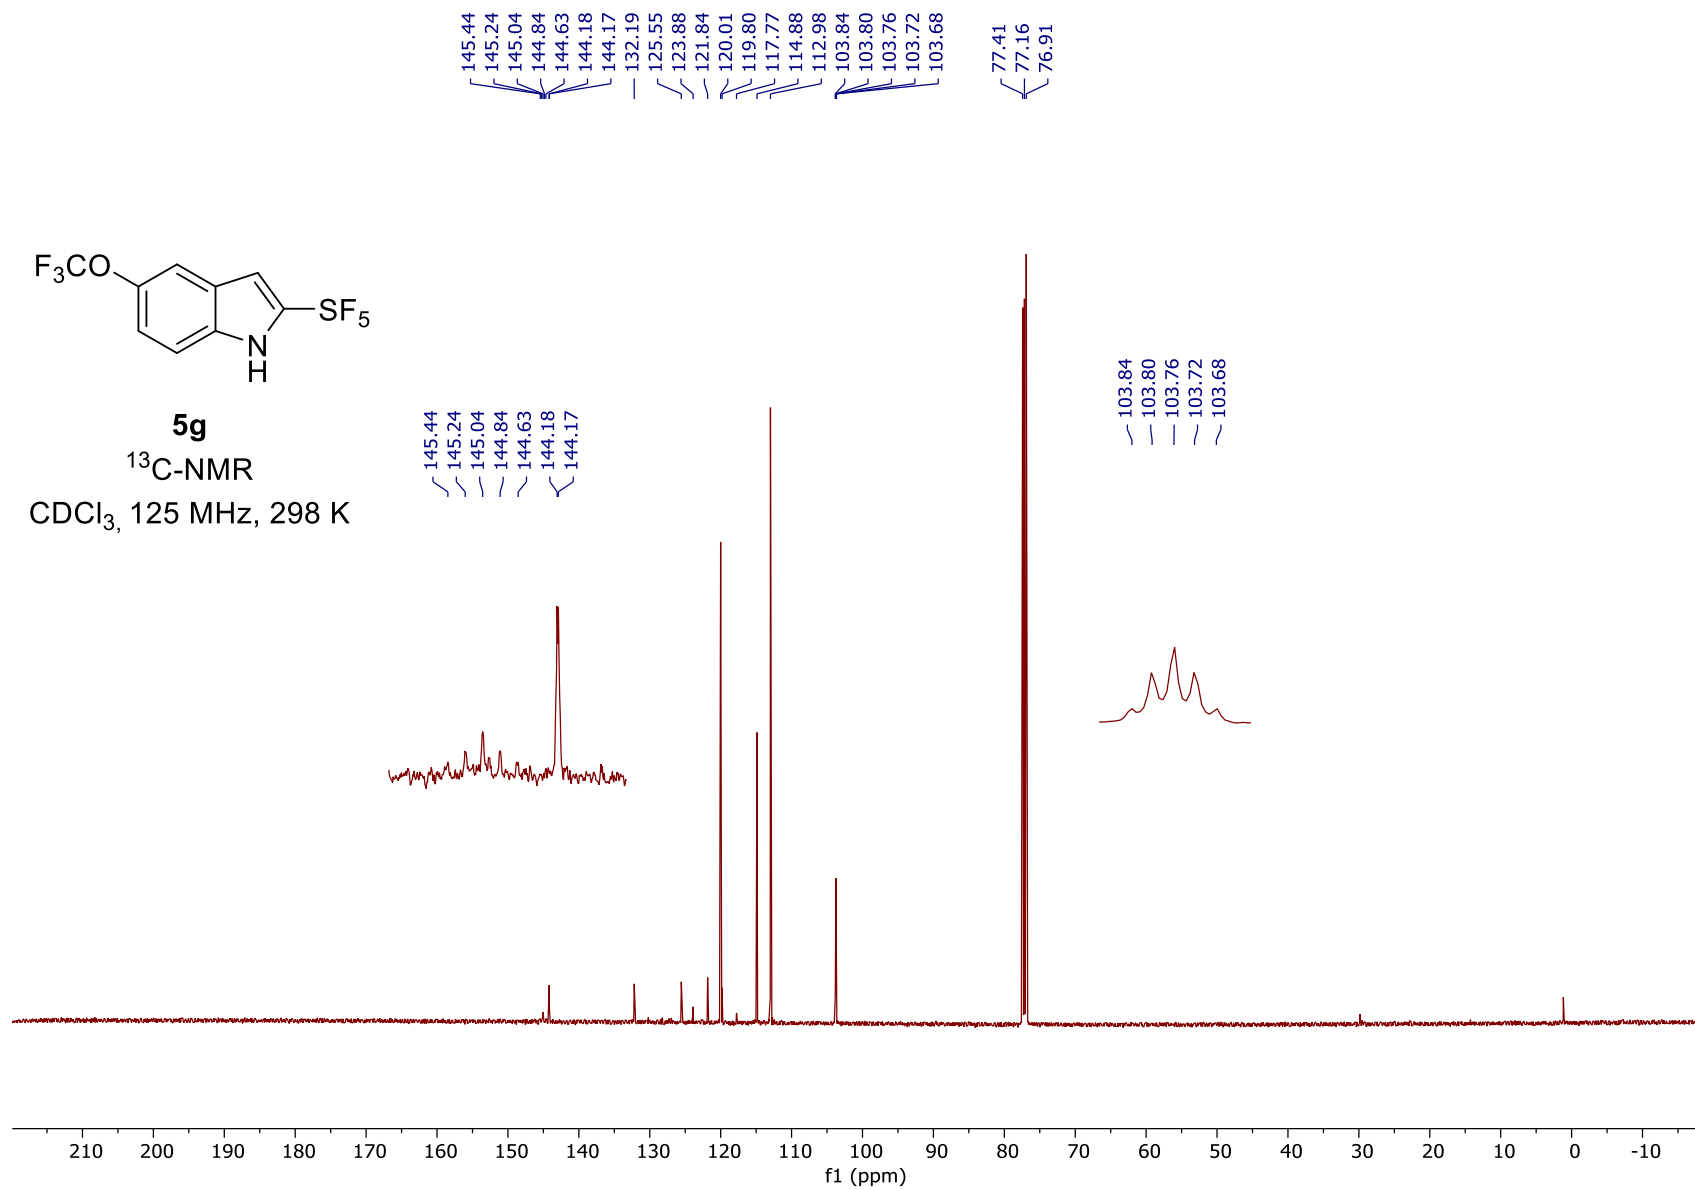

81.25  
80.92  
80.59  
80.26  
79.94

66.08  
65.76

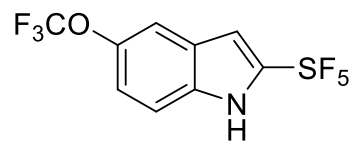

**5g**

<sup>19</sup>F-NMR

CDCl<sub>3</sub>, 471 MHz, 298 K

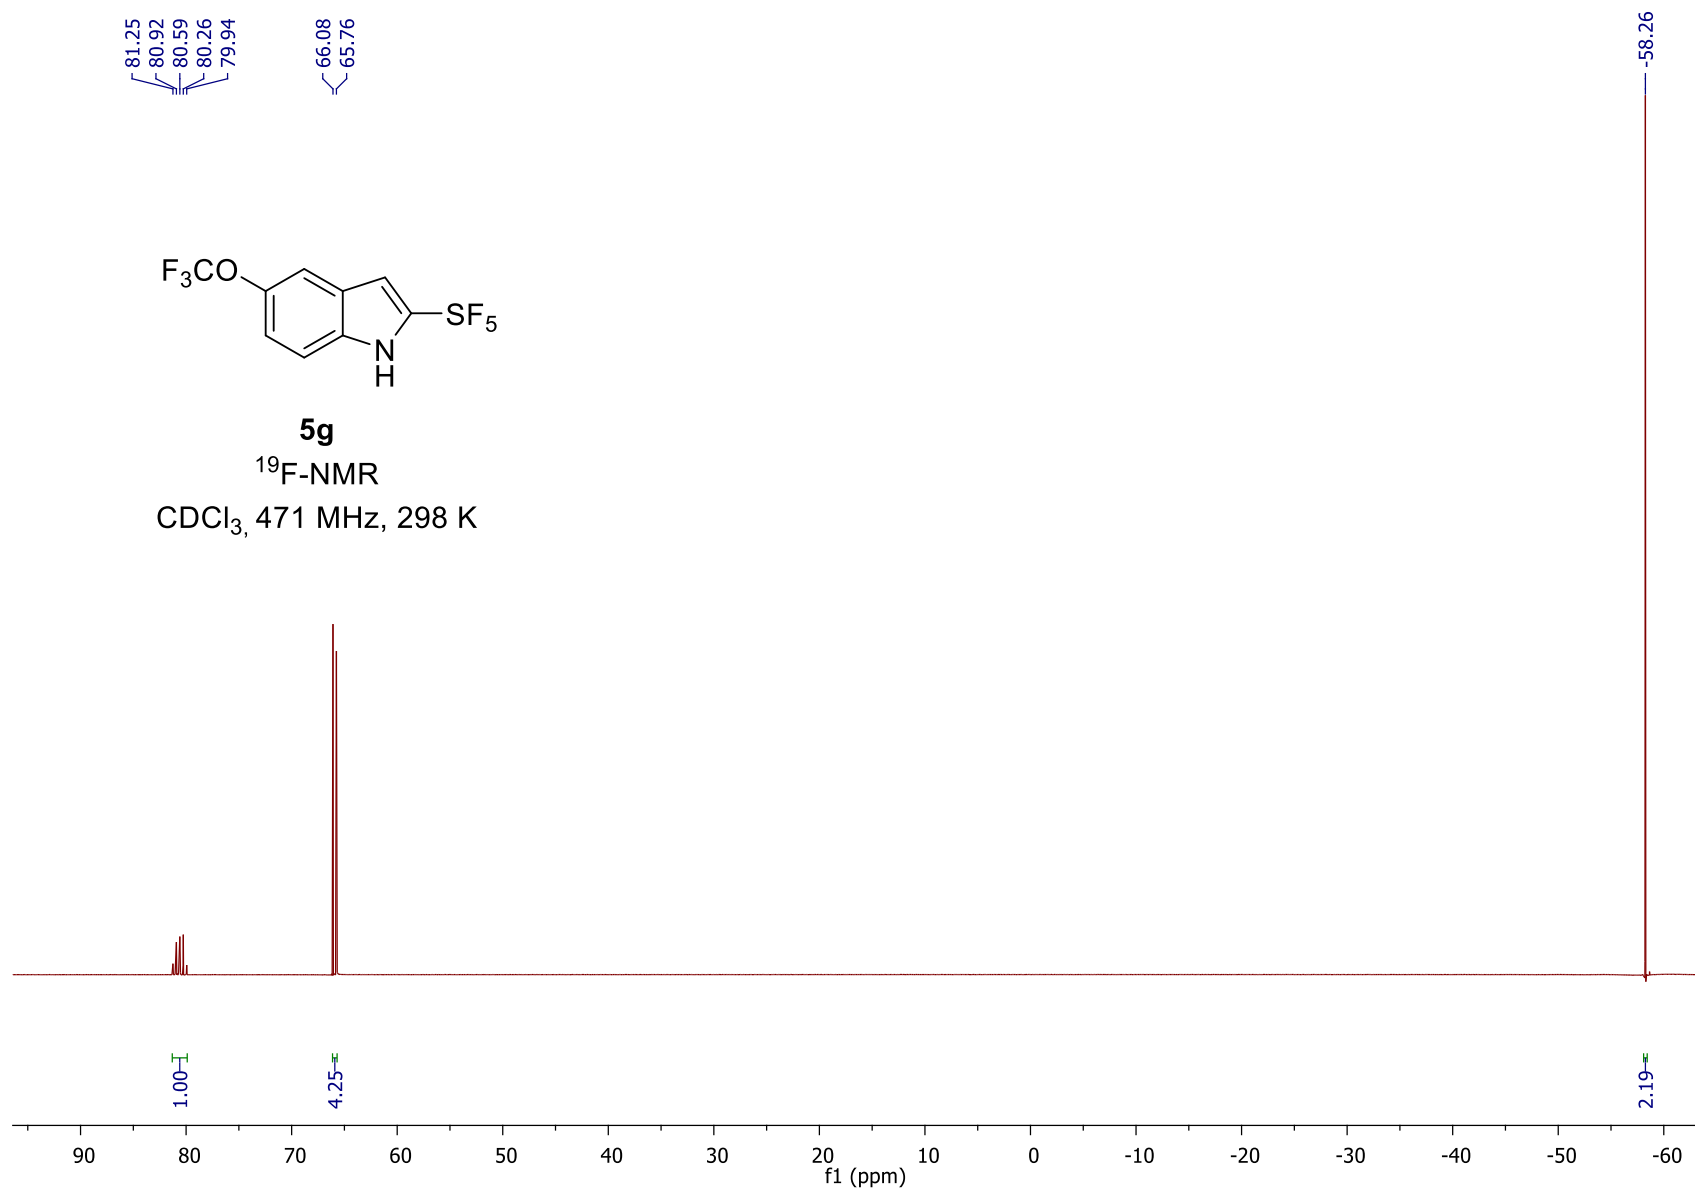

9.03  
8.07  
7.61  
7.61  
7.59  
7.59  
7.54  
7.52  
7.26  
7.03

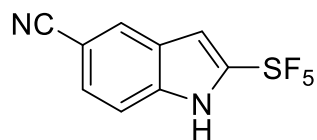

**5h**

<sup>1</sup>H-NMR

CDCl<sub>3</sub>, 400 MHz, 298 K

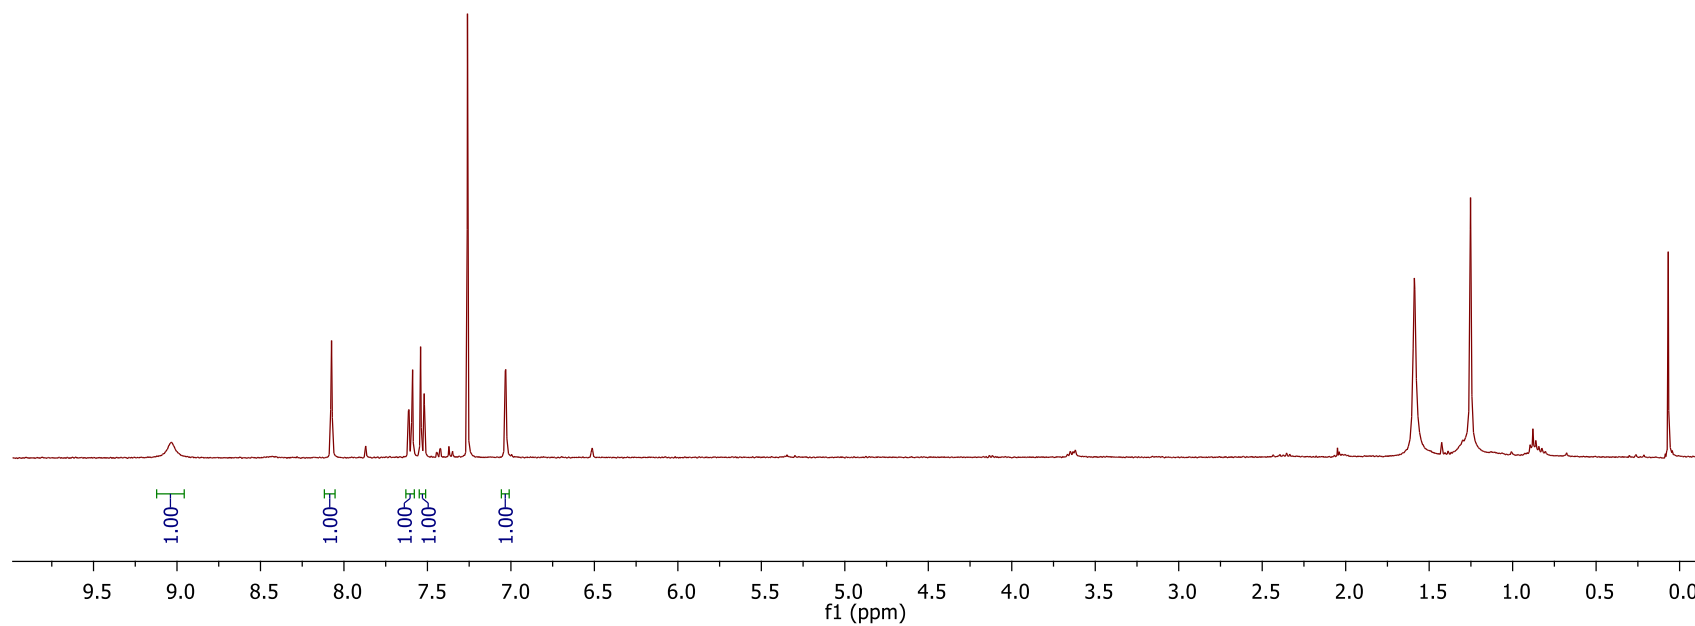

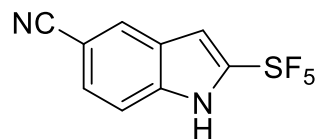**5h**

$^{13}\text{C}$ -NMR  
CDCl<sub>3</sub>, 125 MHz, 298 K

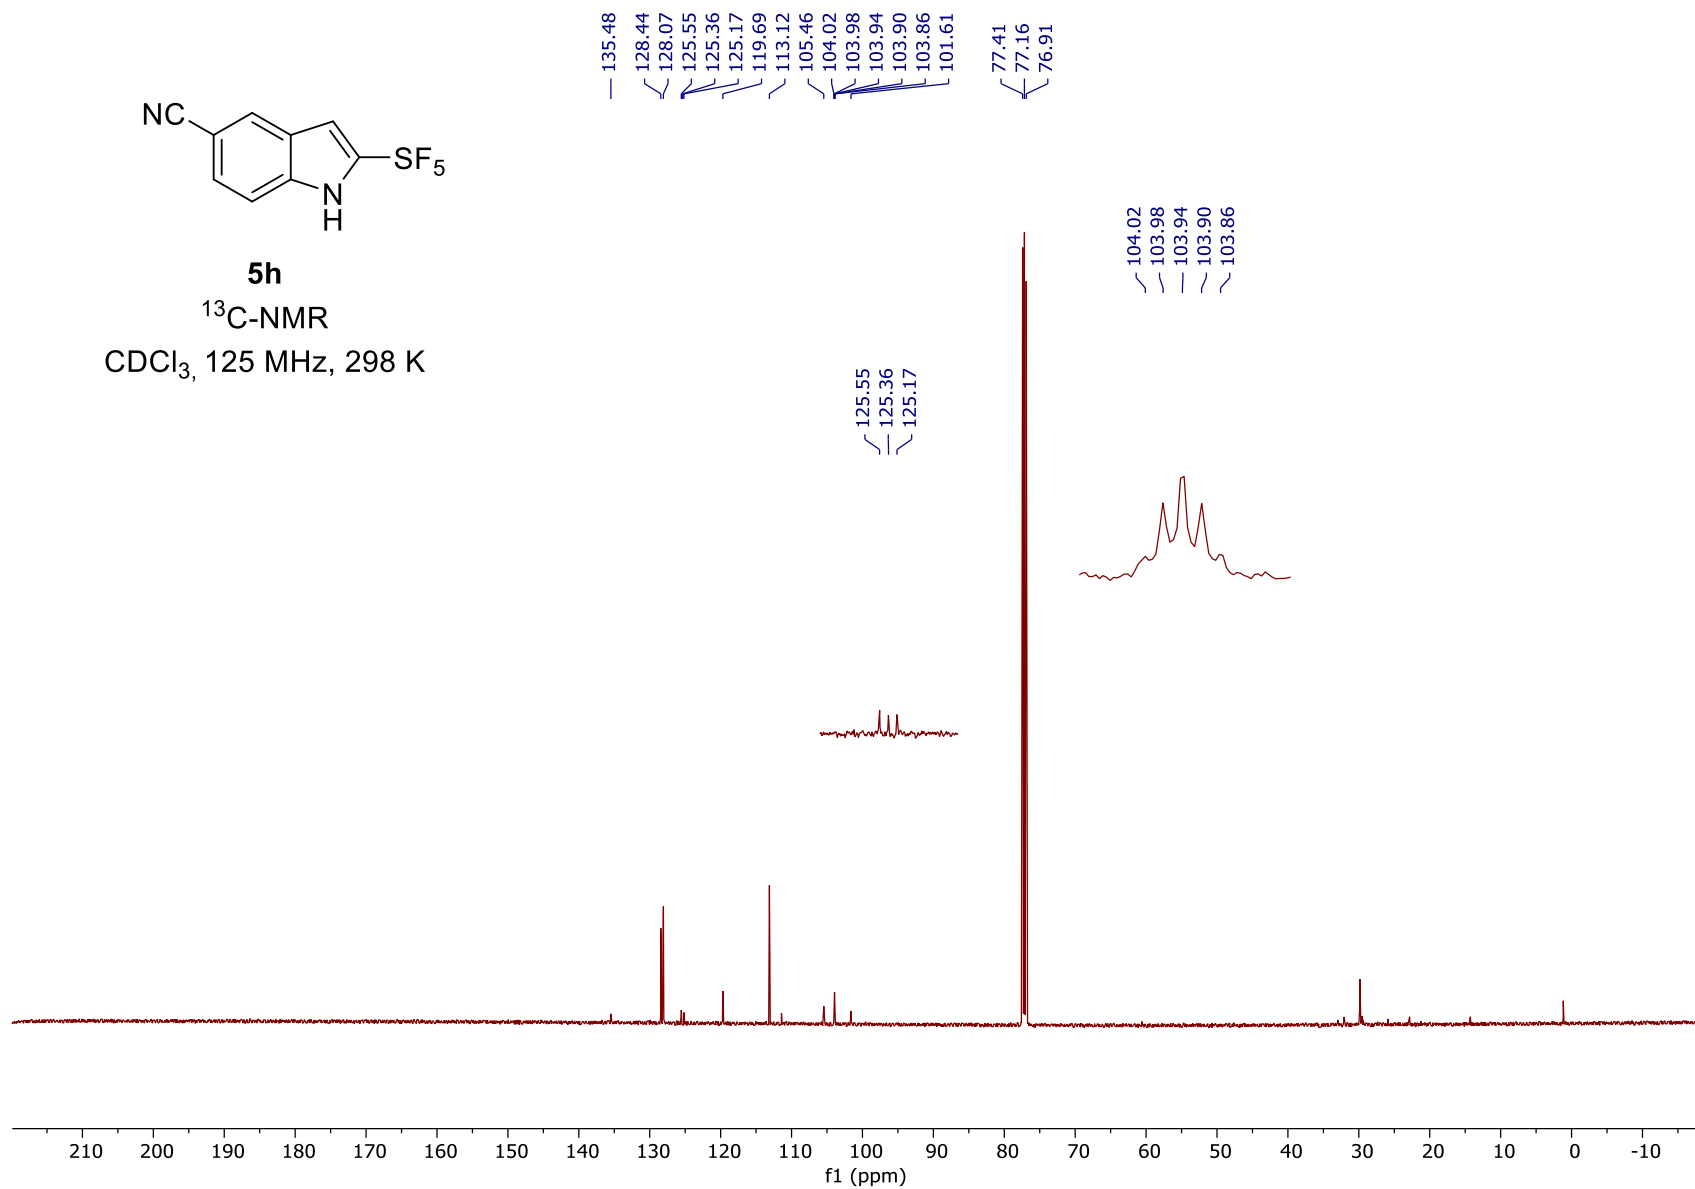



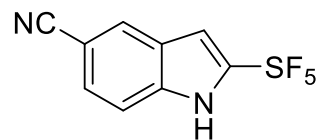**5h**<sup>19</sup>F-NMRCDCl<sub>3</sub>, 471 MHz, 298 K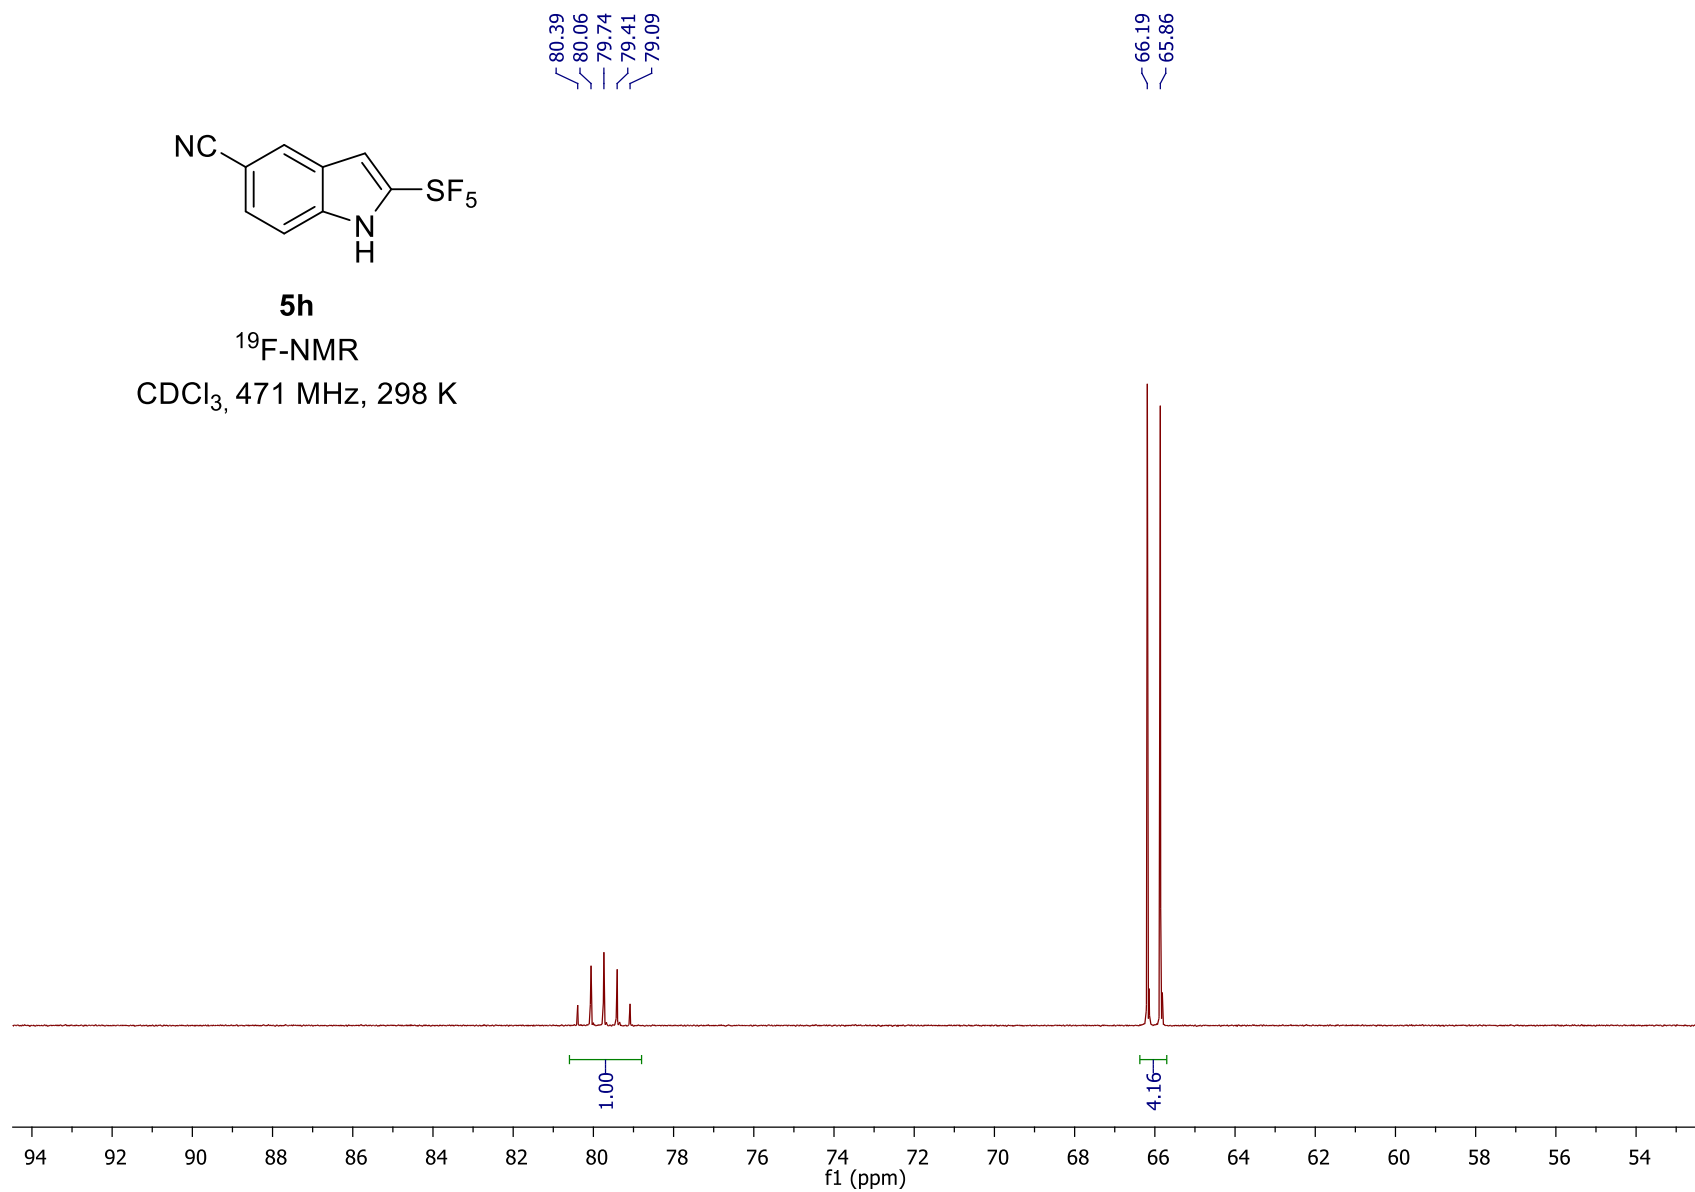

— 8.64  
— 7.82  
7.46  
7.45  
7.44  
7.32  
7.30  
7.26  
6.88

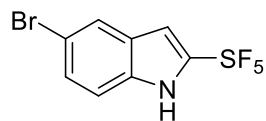

**5i**

<sup>1</sup>H-NMR

CDCl<sub>3</sub>, 500 MHz, 298 K

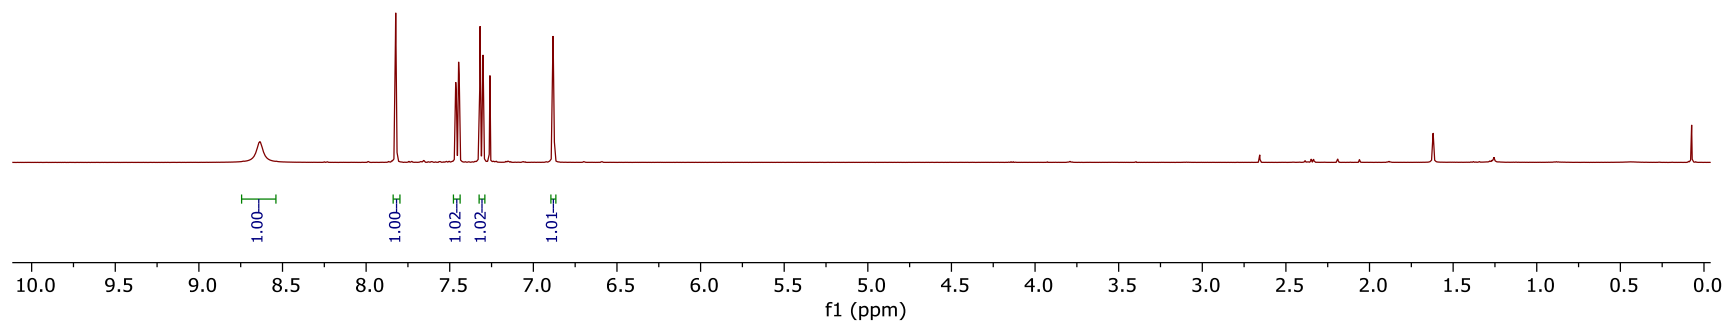

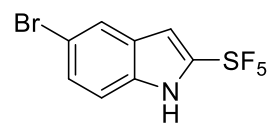**5i**<sup>13</sup>C-NMRCDCl<sub>3</sub>, 125 MHz, 298 K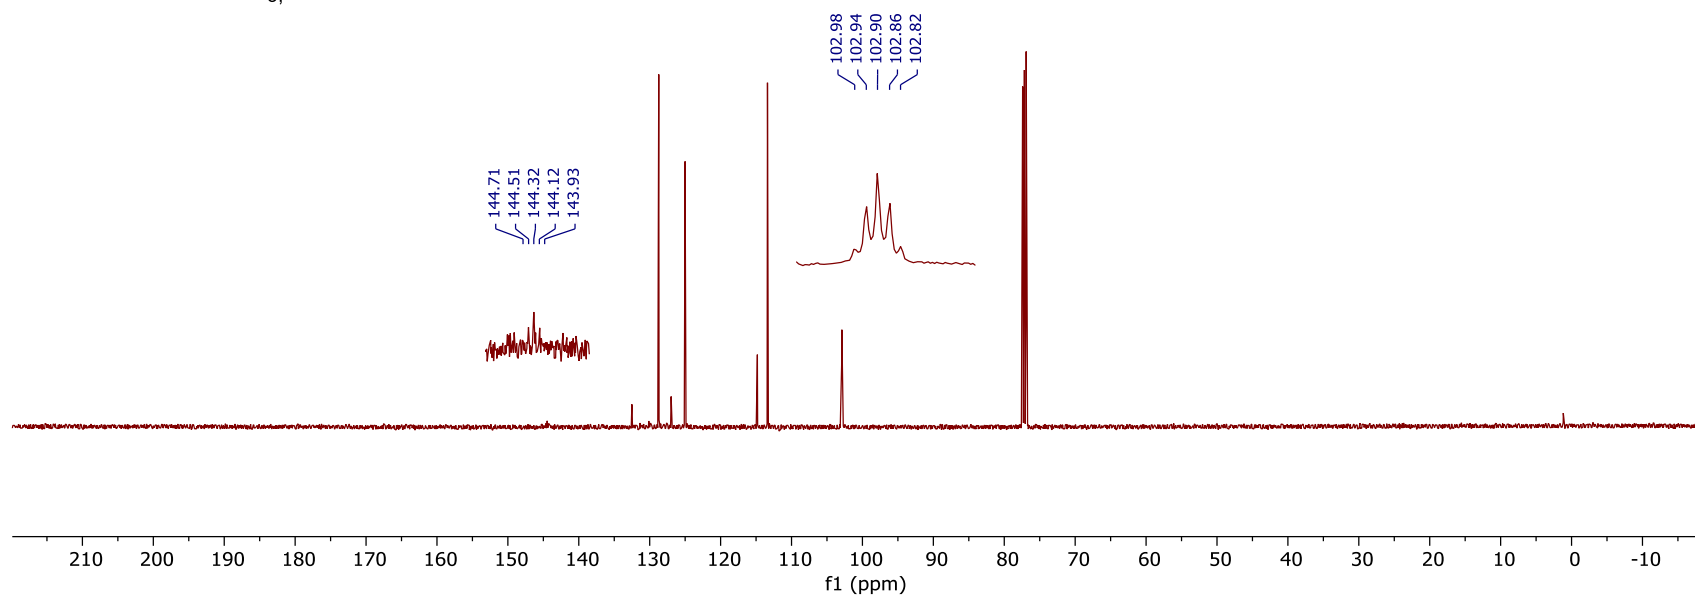

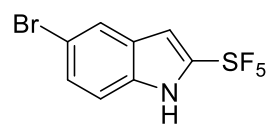**5i**<sup>19</sup>F-NMRCDCl<sub>3</sub>, 471 MHz, 298 K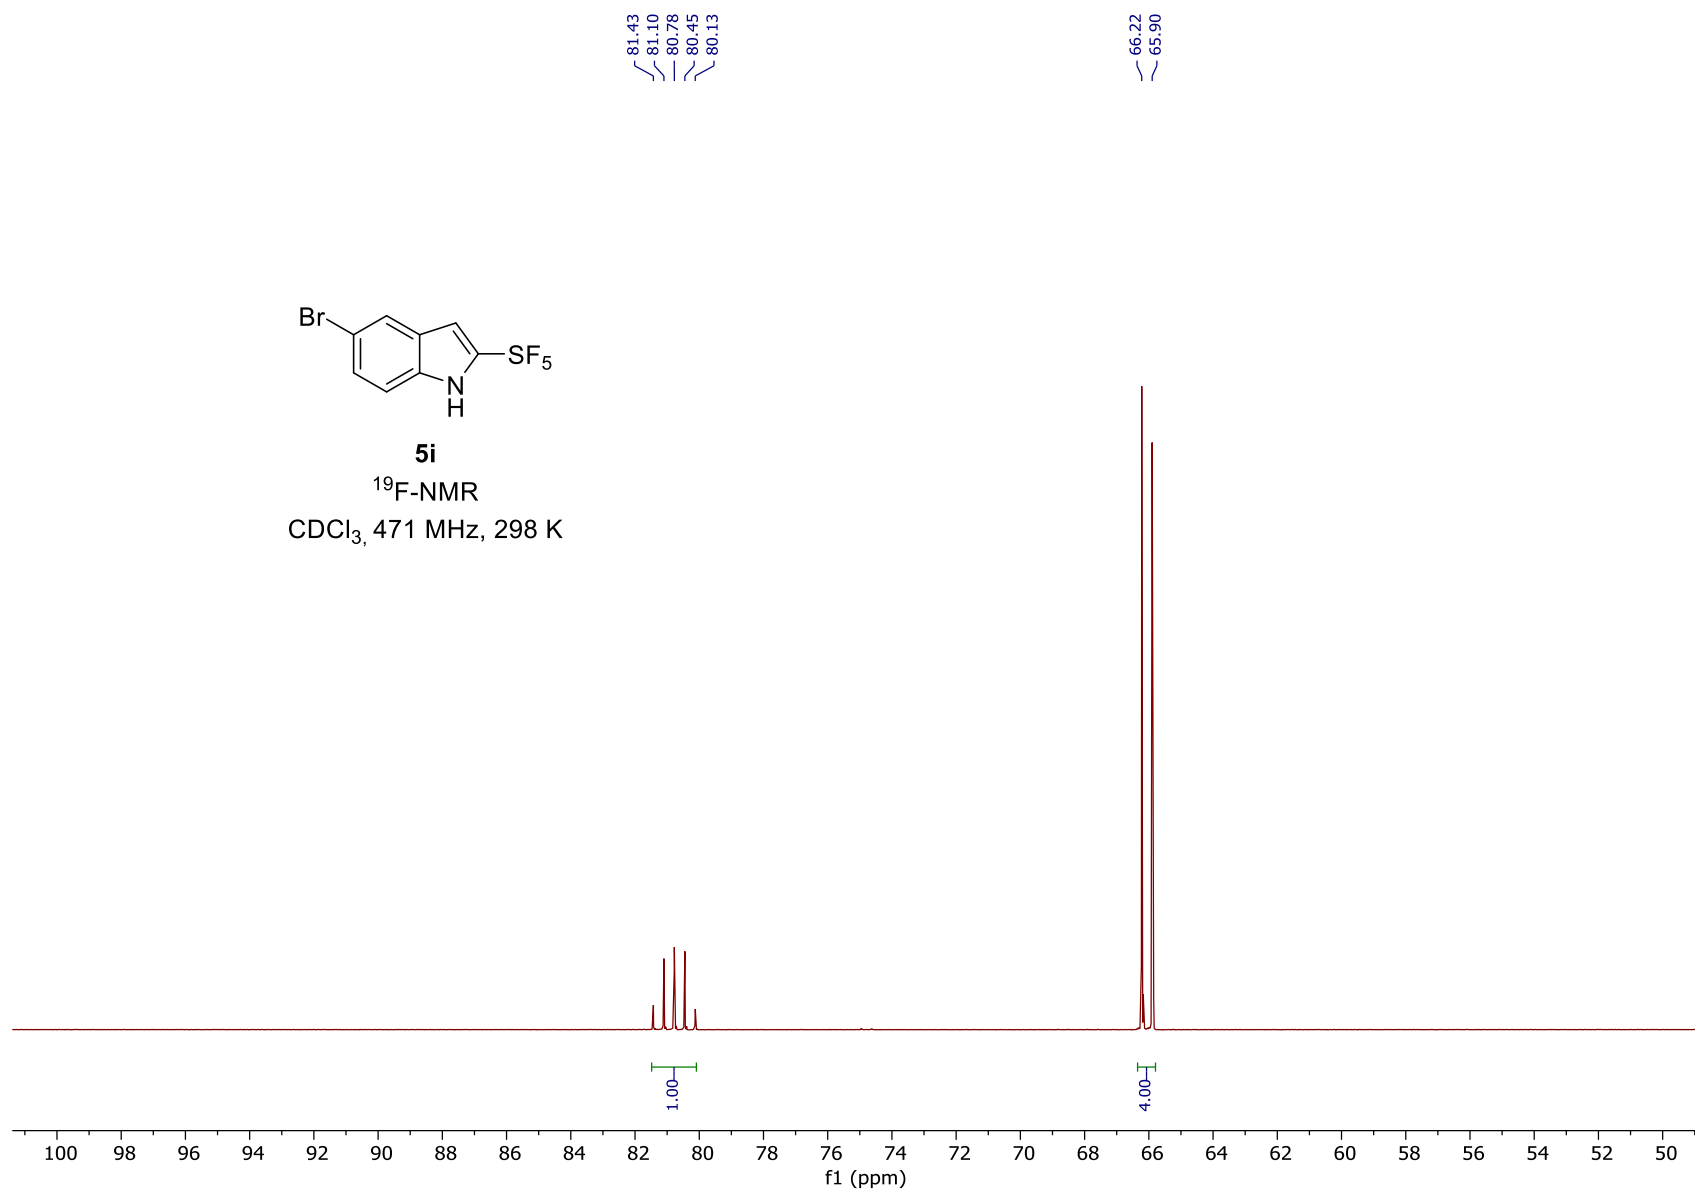

8.61  
7.60  
7.59  
7.42  
7.26  
7.26  
7.21  
7.20  
7.20  
7.19  
7.18  
6.92

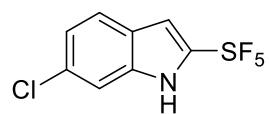

**5j**

<sup>1</sup>H-NMR

CDCl<sub>3</sub>, 500 MHz, 298 K

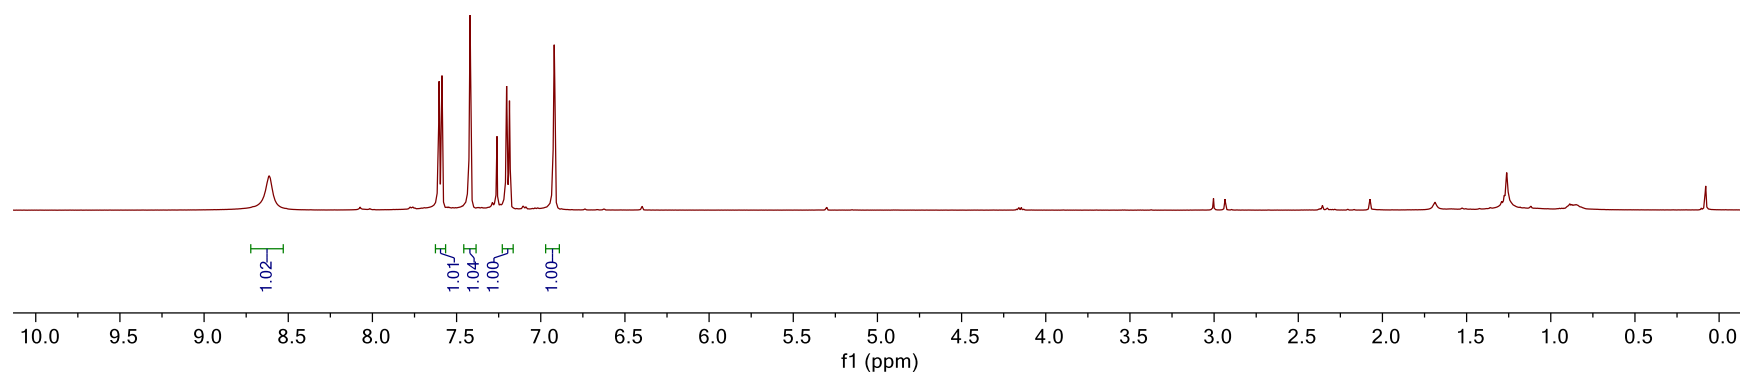

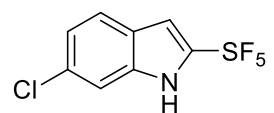**5j**<sup>13</sup>C-NMRCDCl<sub>3</sub>, 125 MHz, 298 K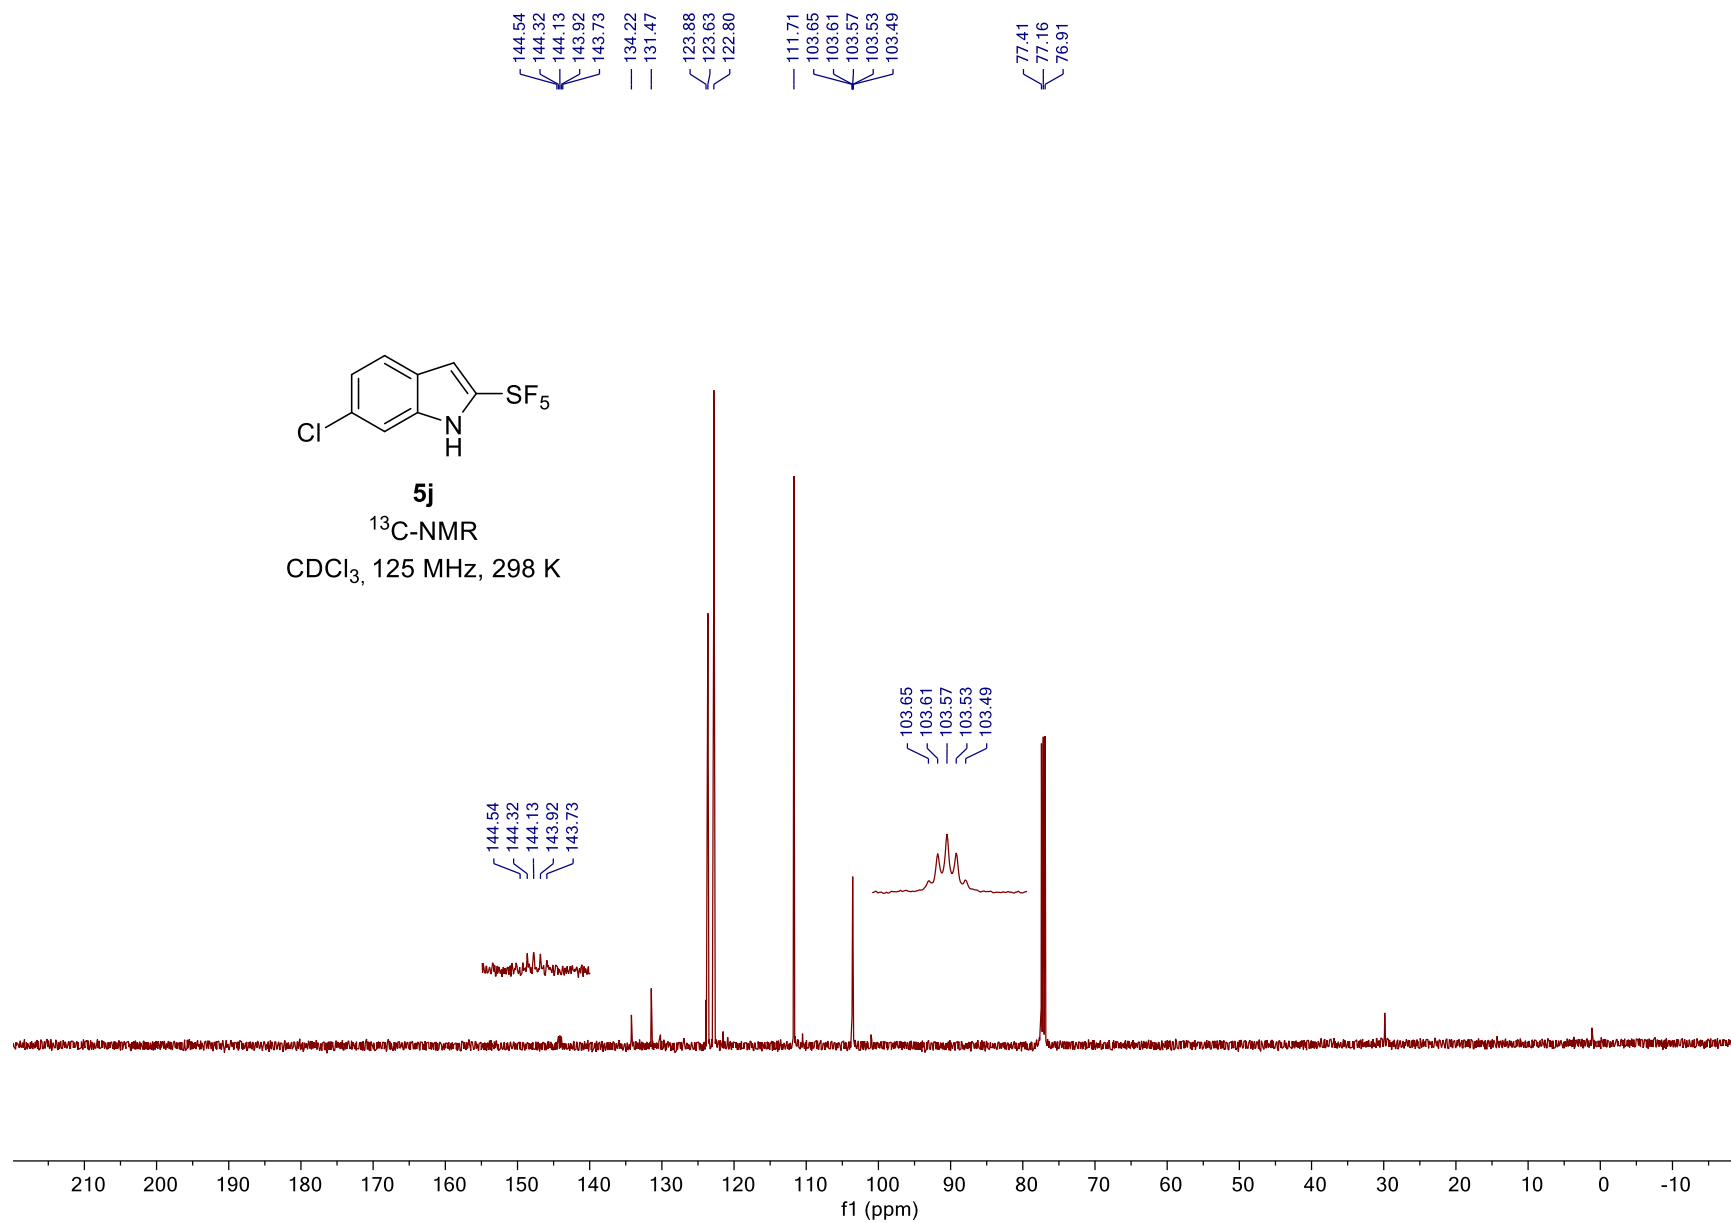

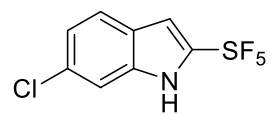**5j**<sup>19</sup>F-NMRCDCl<sub>3</sub>, 471 MHz, 298 K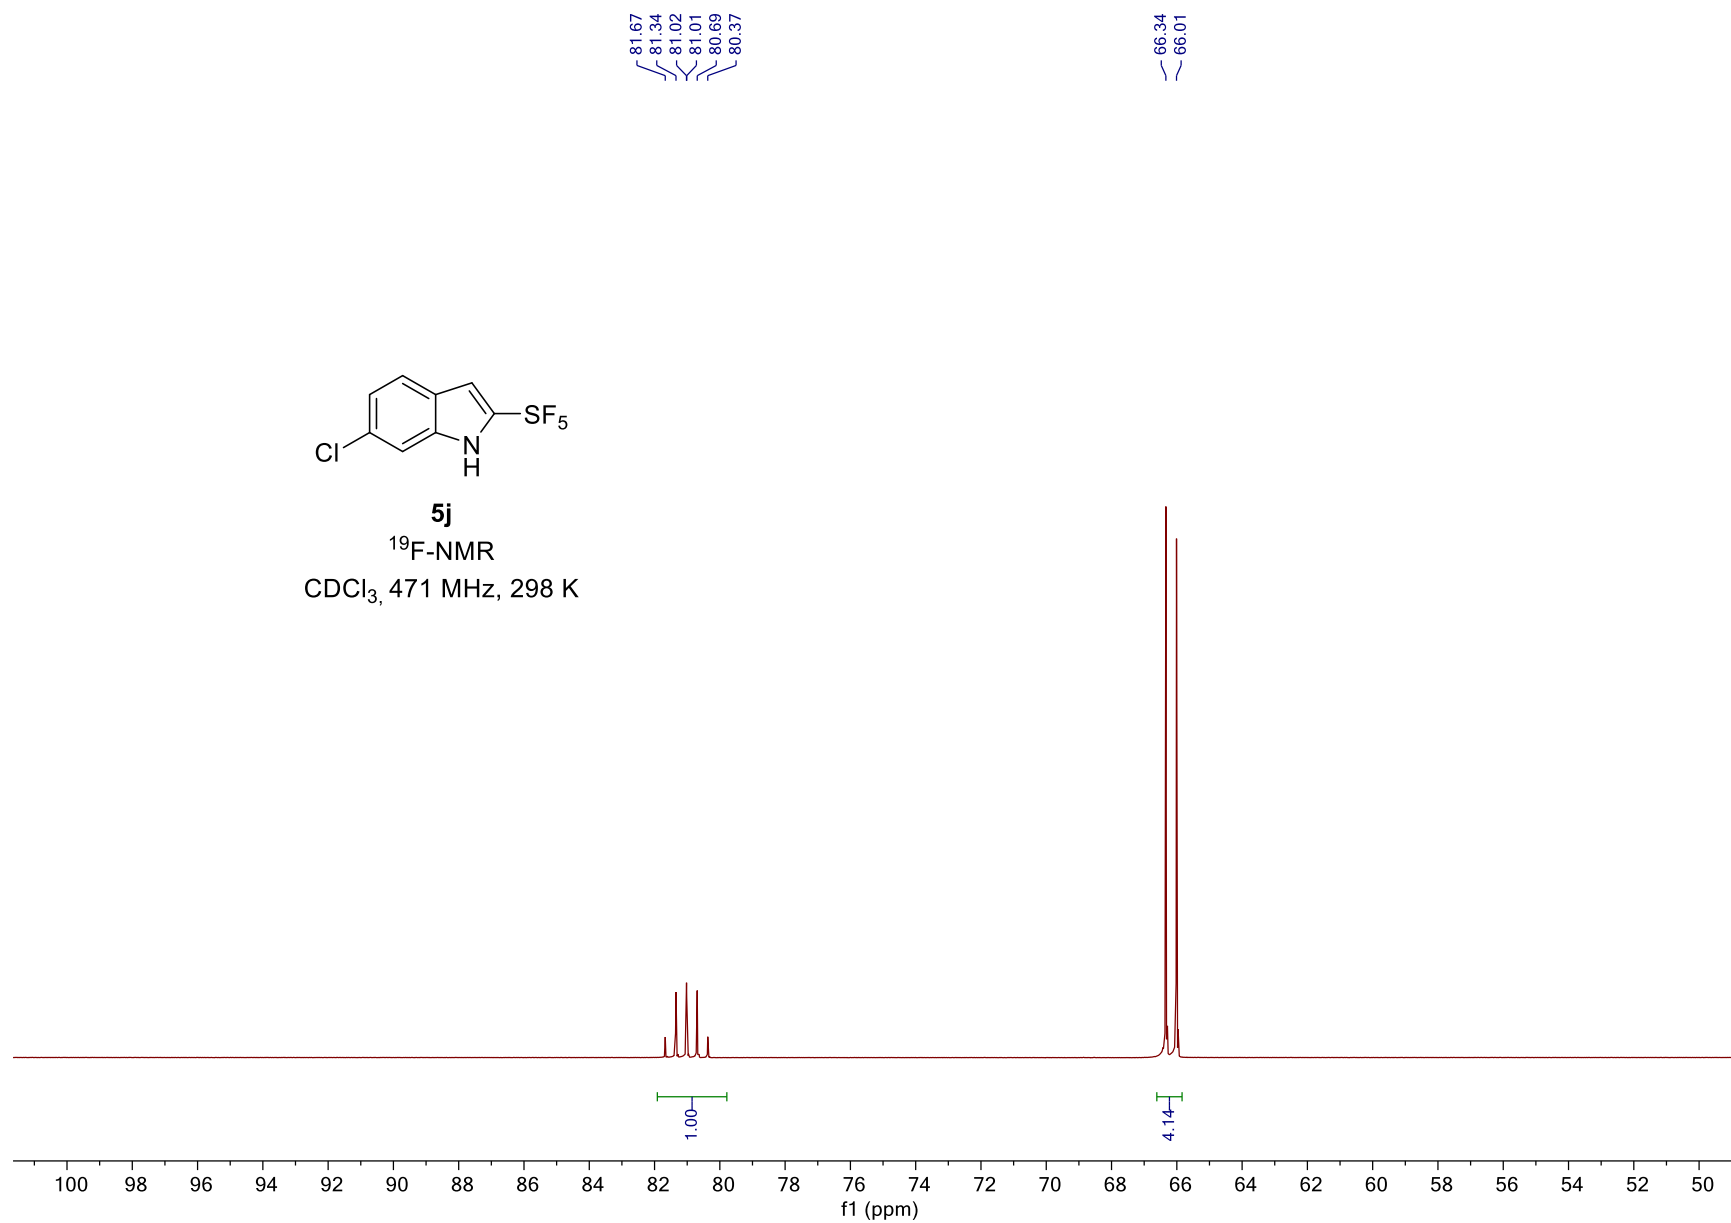

8.65  
7.63  
7.62  
7.61  
7.60  
7.26  
7.11  
7.11  
7.09  
7.09  
7.01  
7.01  
7.00  
6.99  
6.99  
6.98  
6.97  
6.93  
6.92

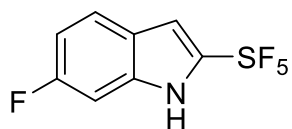

**5k**

<sup>1</sup>H-NMR

CDCl<sub>3</sub>, 500 MHz, 298 K

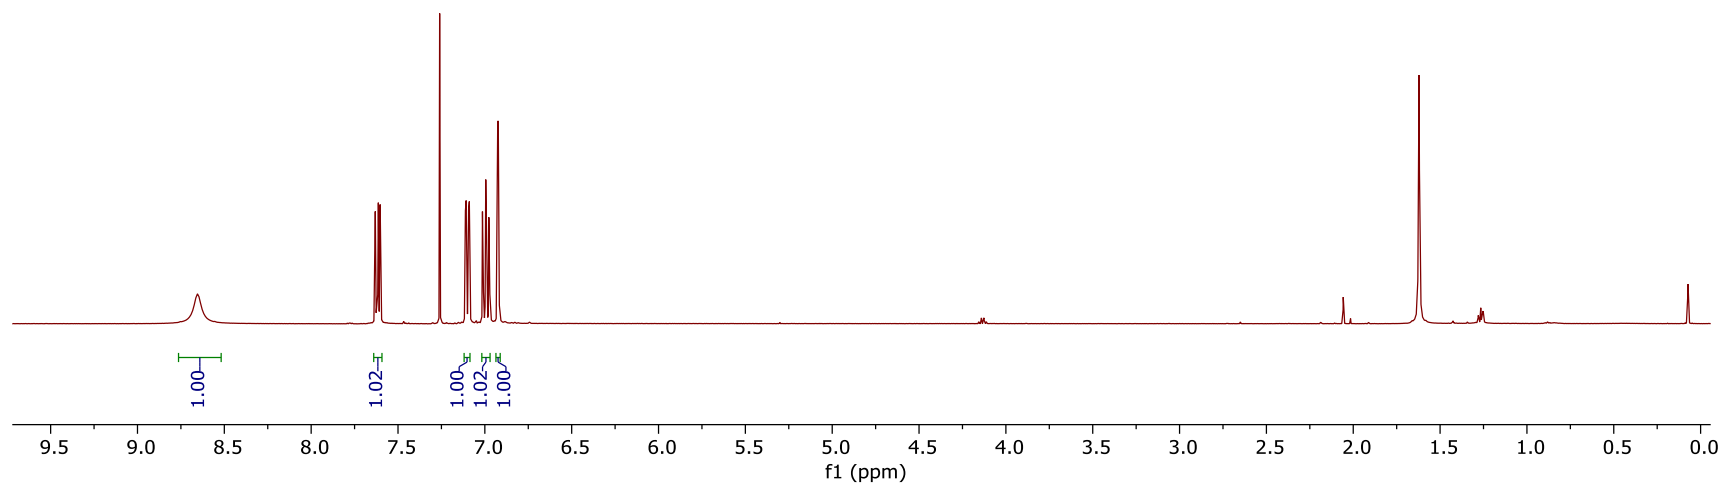



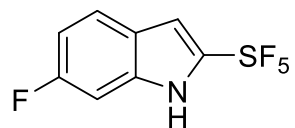**5k**<sup>13</sup>C-NMRCDCl<sub>3</sub>, 125 MHz, 298 K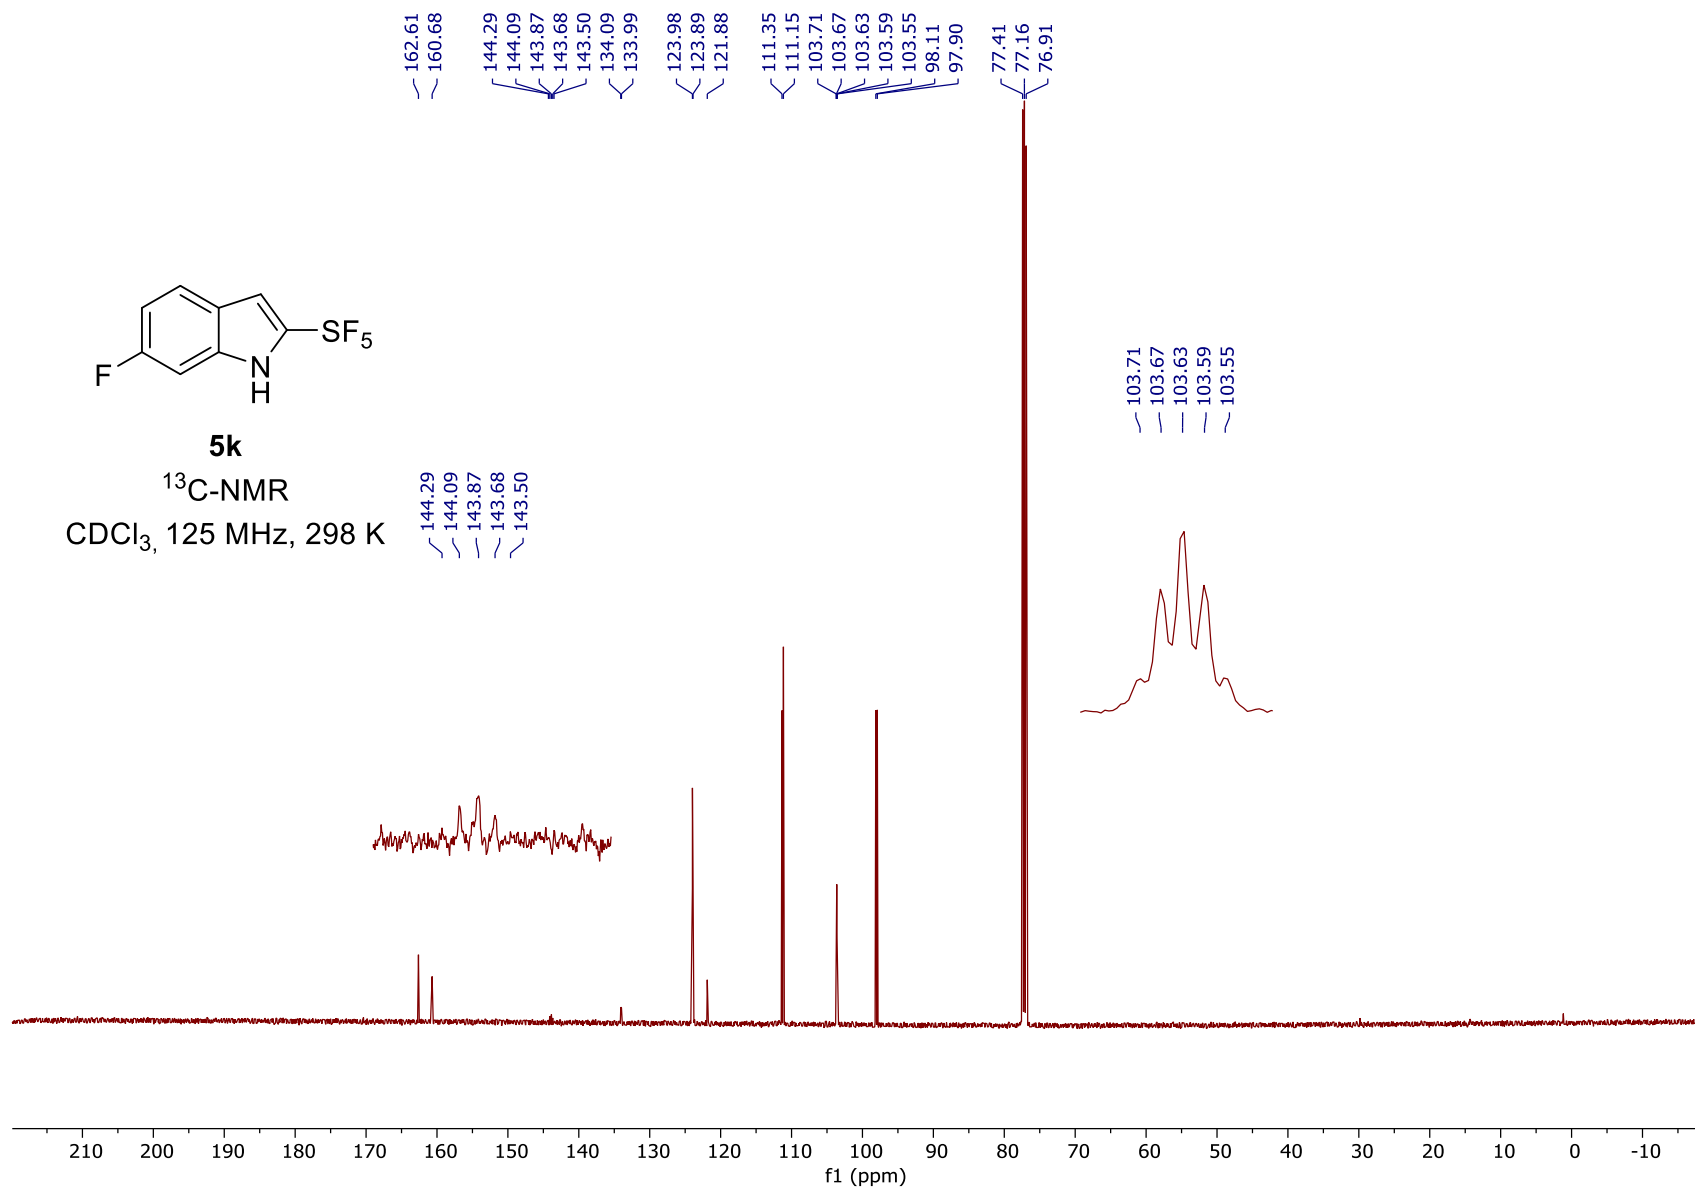

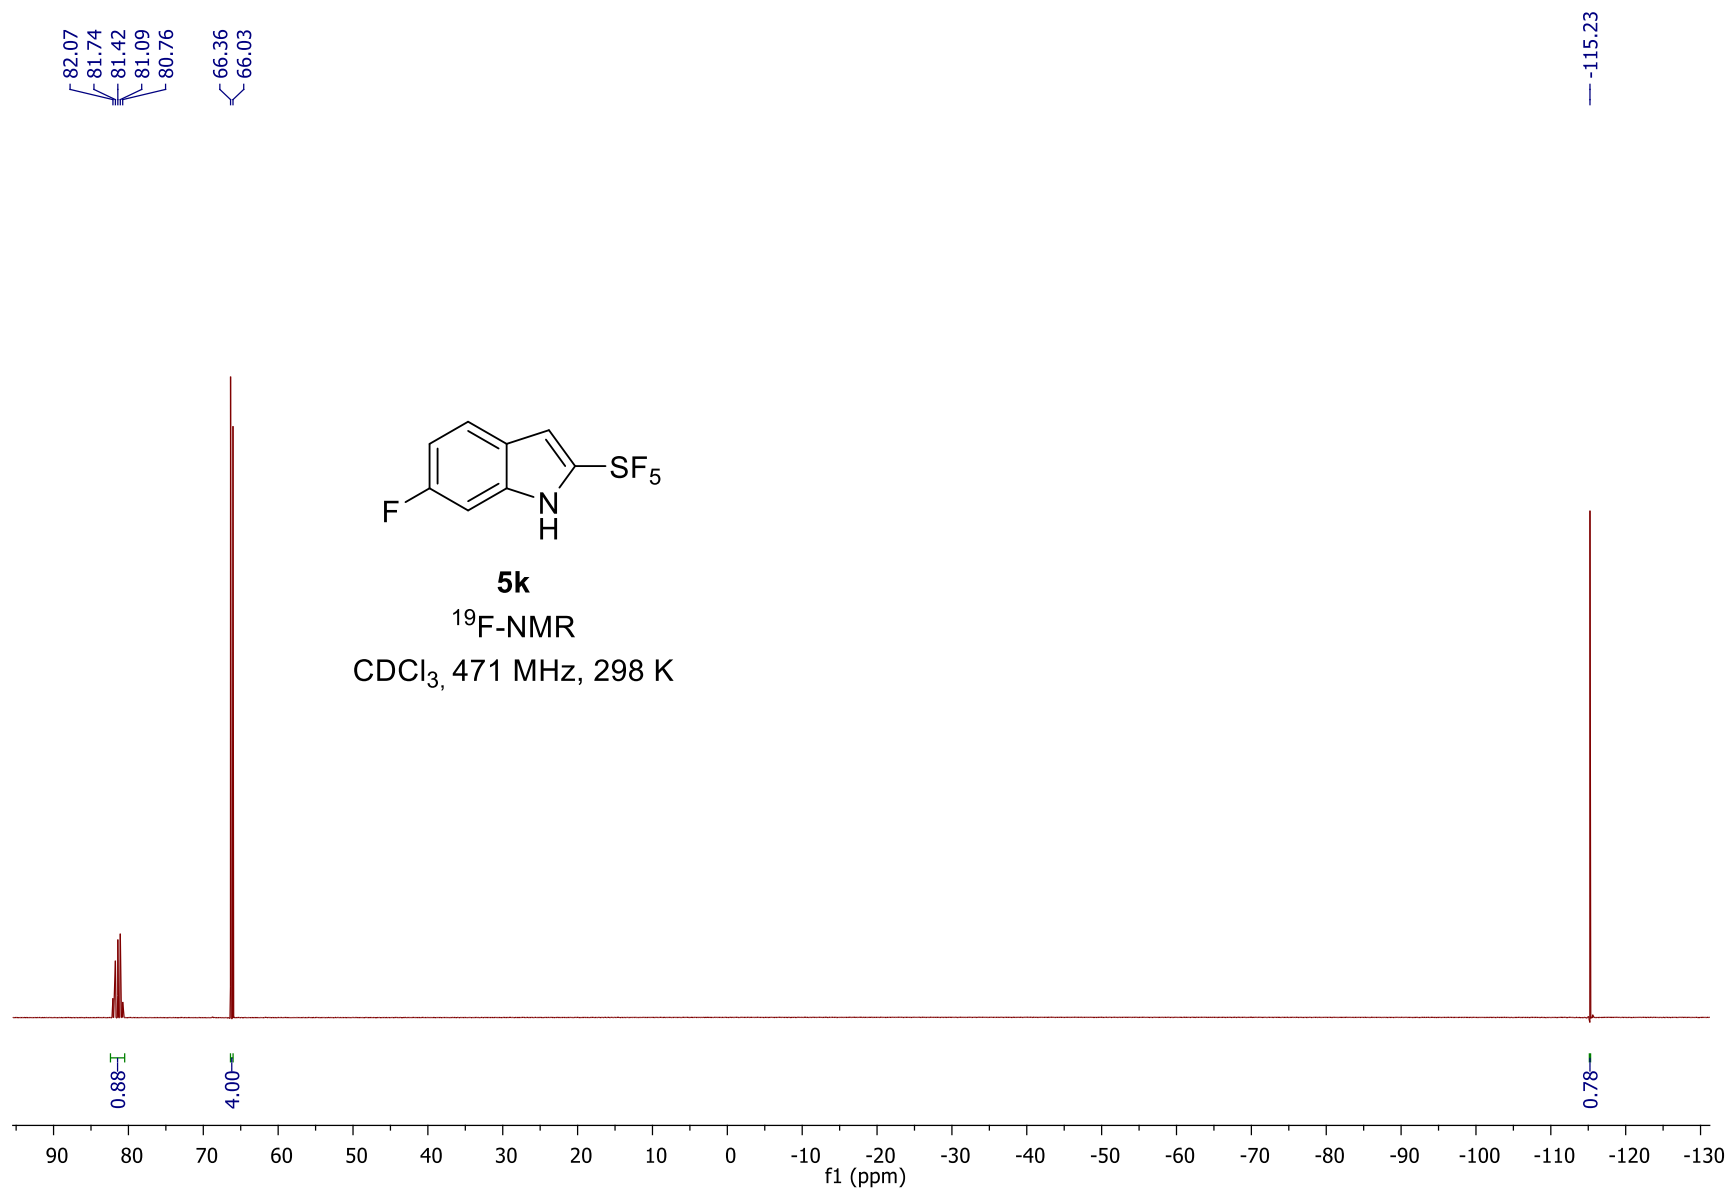

8.94  
7.46  
7.46  
7.26  
7.12  
7.12  
7.10  
7.10  
6.92  
6.92

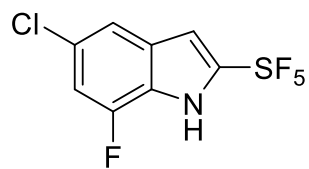

**5I**

$^1\text{H-NMR}$

$\text{CDCl}_3$ , 500 MHz, 298 K

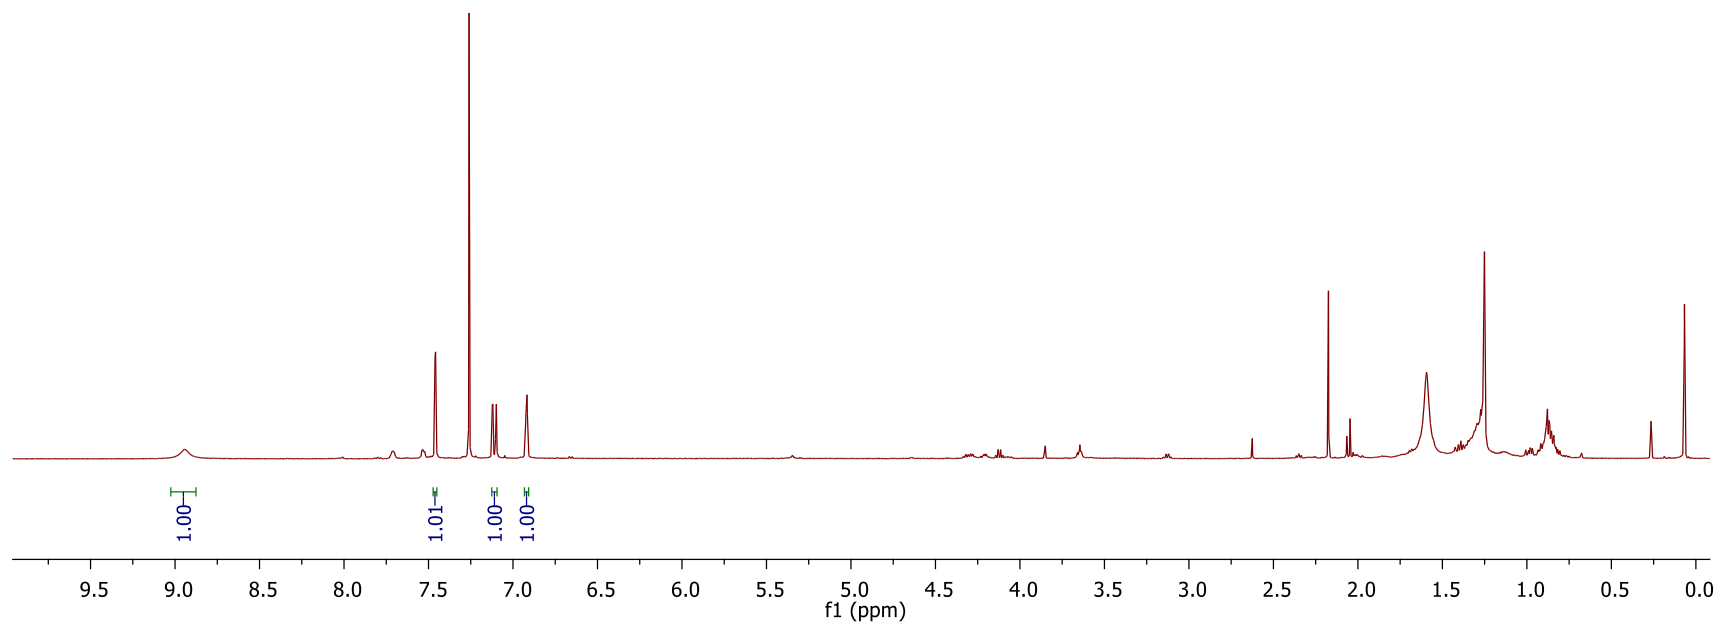

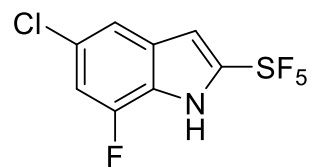**51**<sup>13</sup>C-NMRCDCl<sub>3</sub>, 125 MHz, 298 K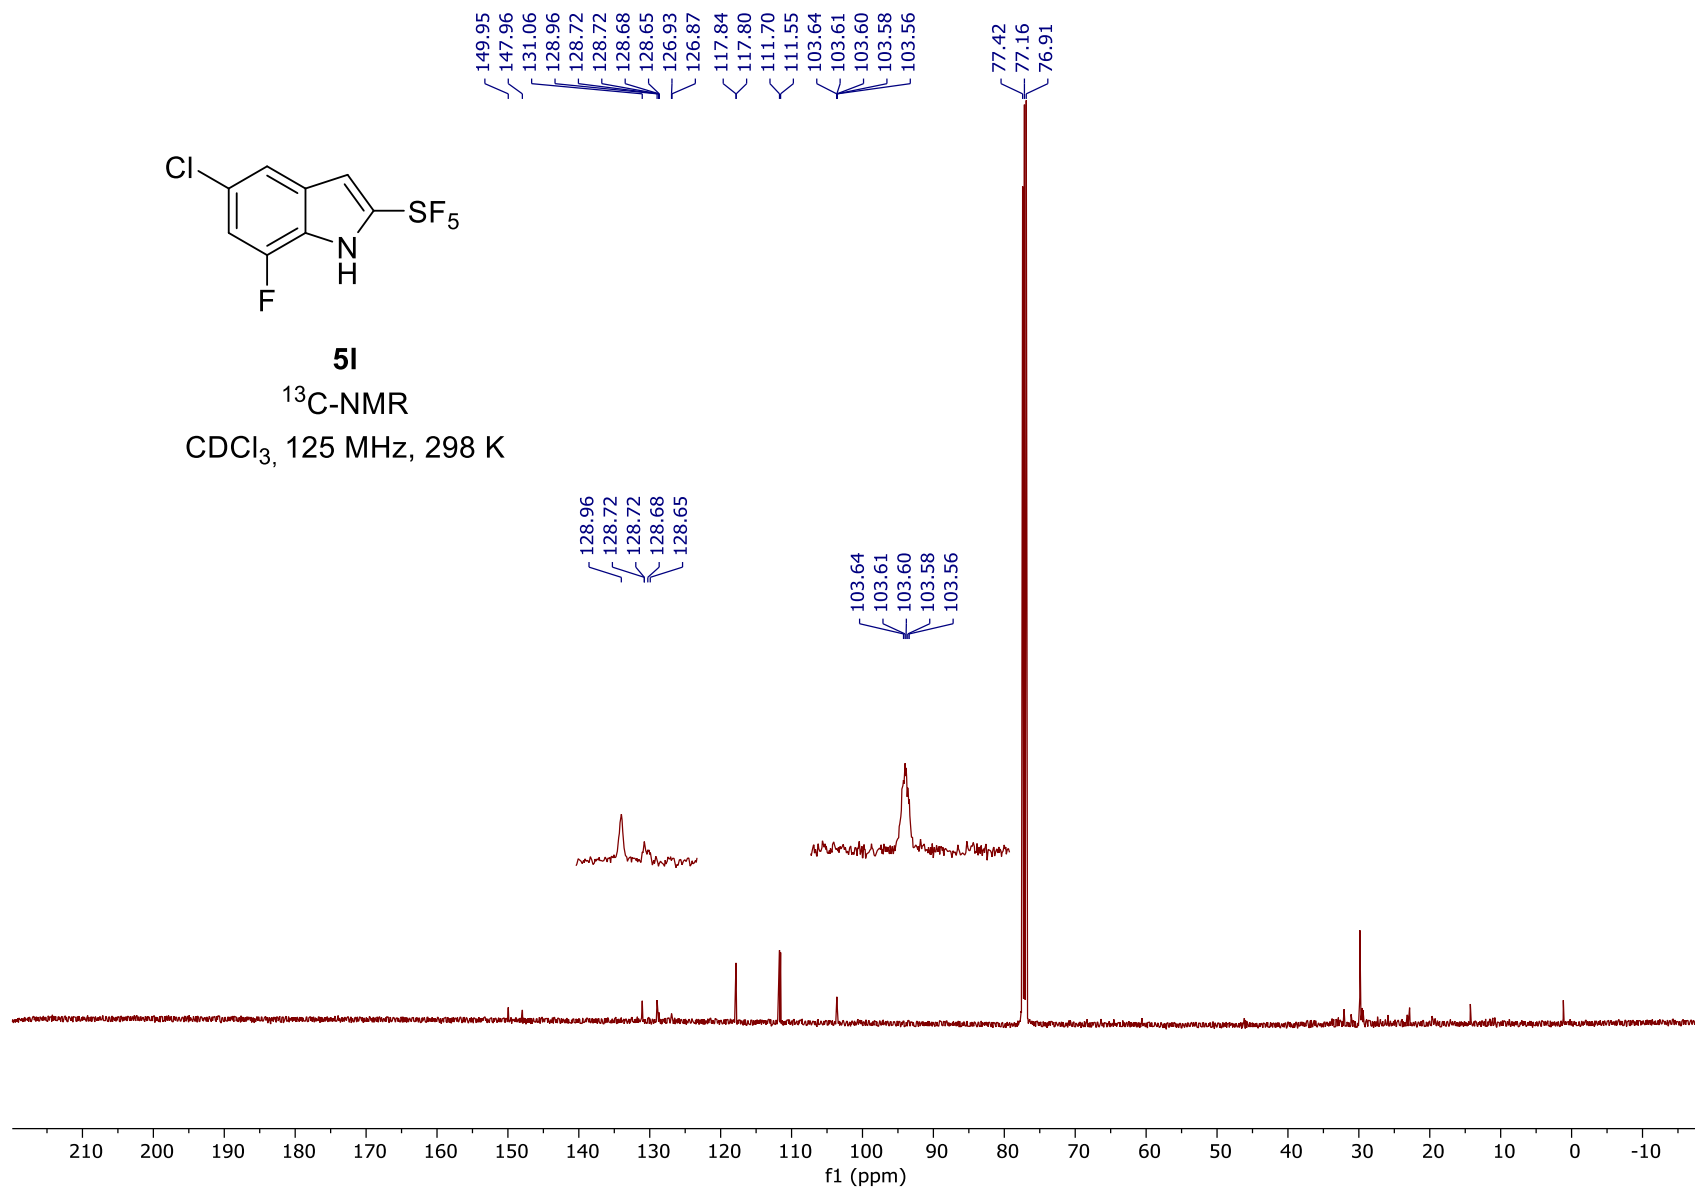

80.50  
80.17  
79.85  
79.52  
79.19

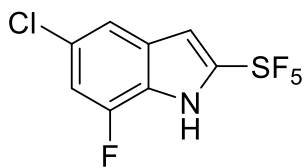

**51**

<sup>19</sup>F-NMR

CDCl<sub>3</sub>, 471 MHz, 298 K

-131.04

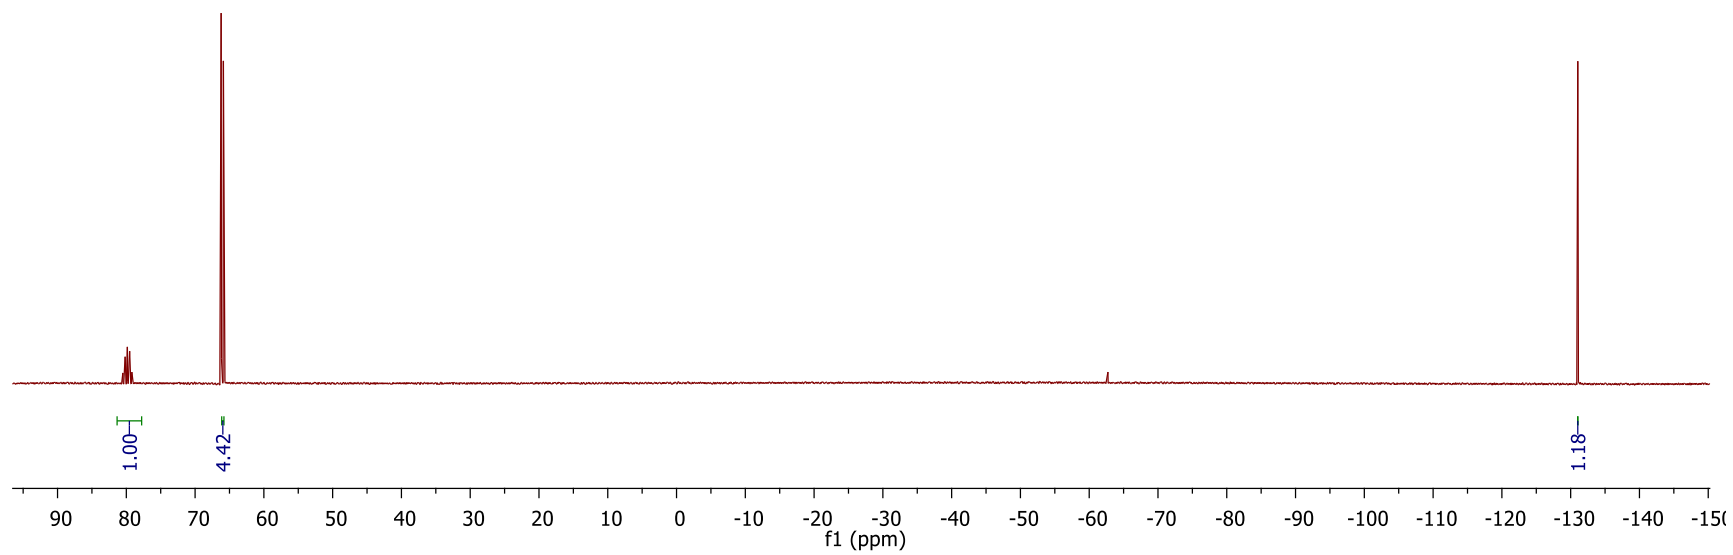

8.56  
8.56  
8.13  
8.13  
8.12  
8.12  
7.28  
7.27  
7.27  
7.26  
6.93

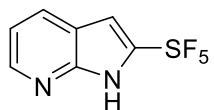

**5o**

<sup>1</sup>H-NMR  
CDCl<sub>3</sub>, 500 MHz, 298 K

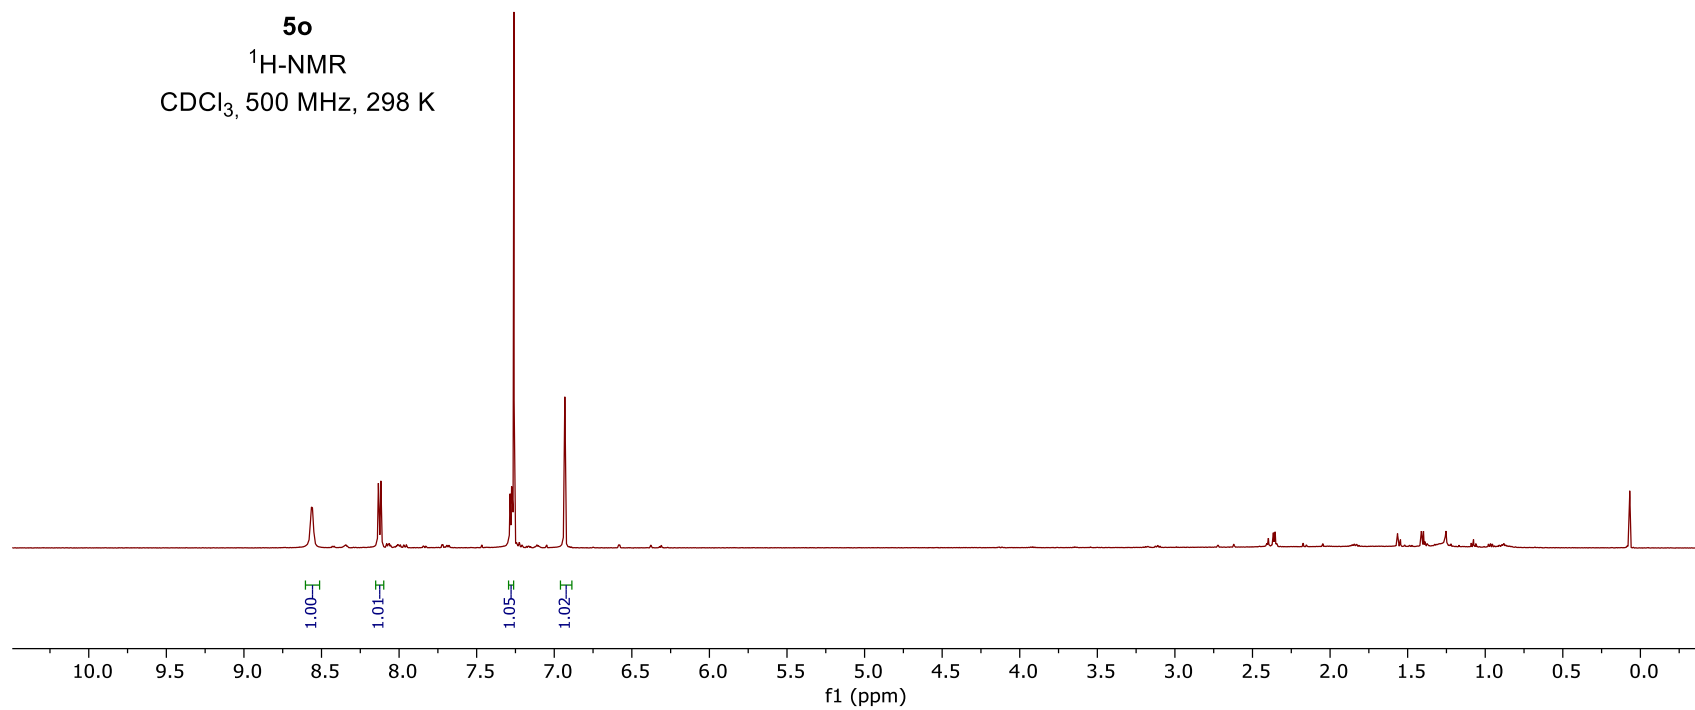

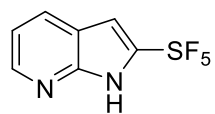**5o**<sup>13</sup>C-NMRCDCl<sub>3</sub>, 125 MHz, 298 K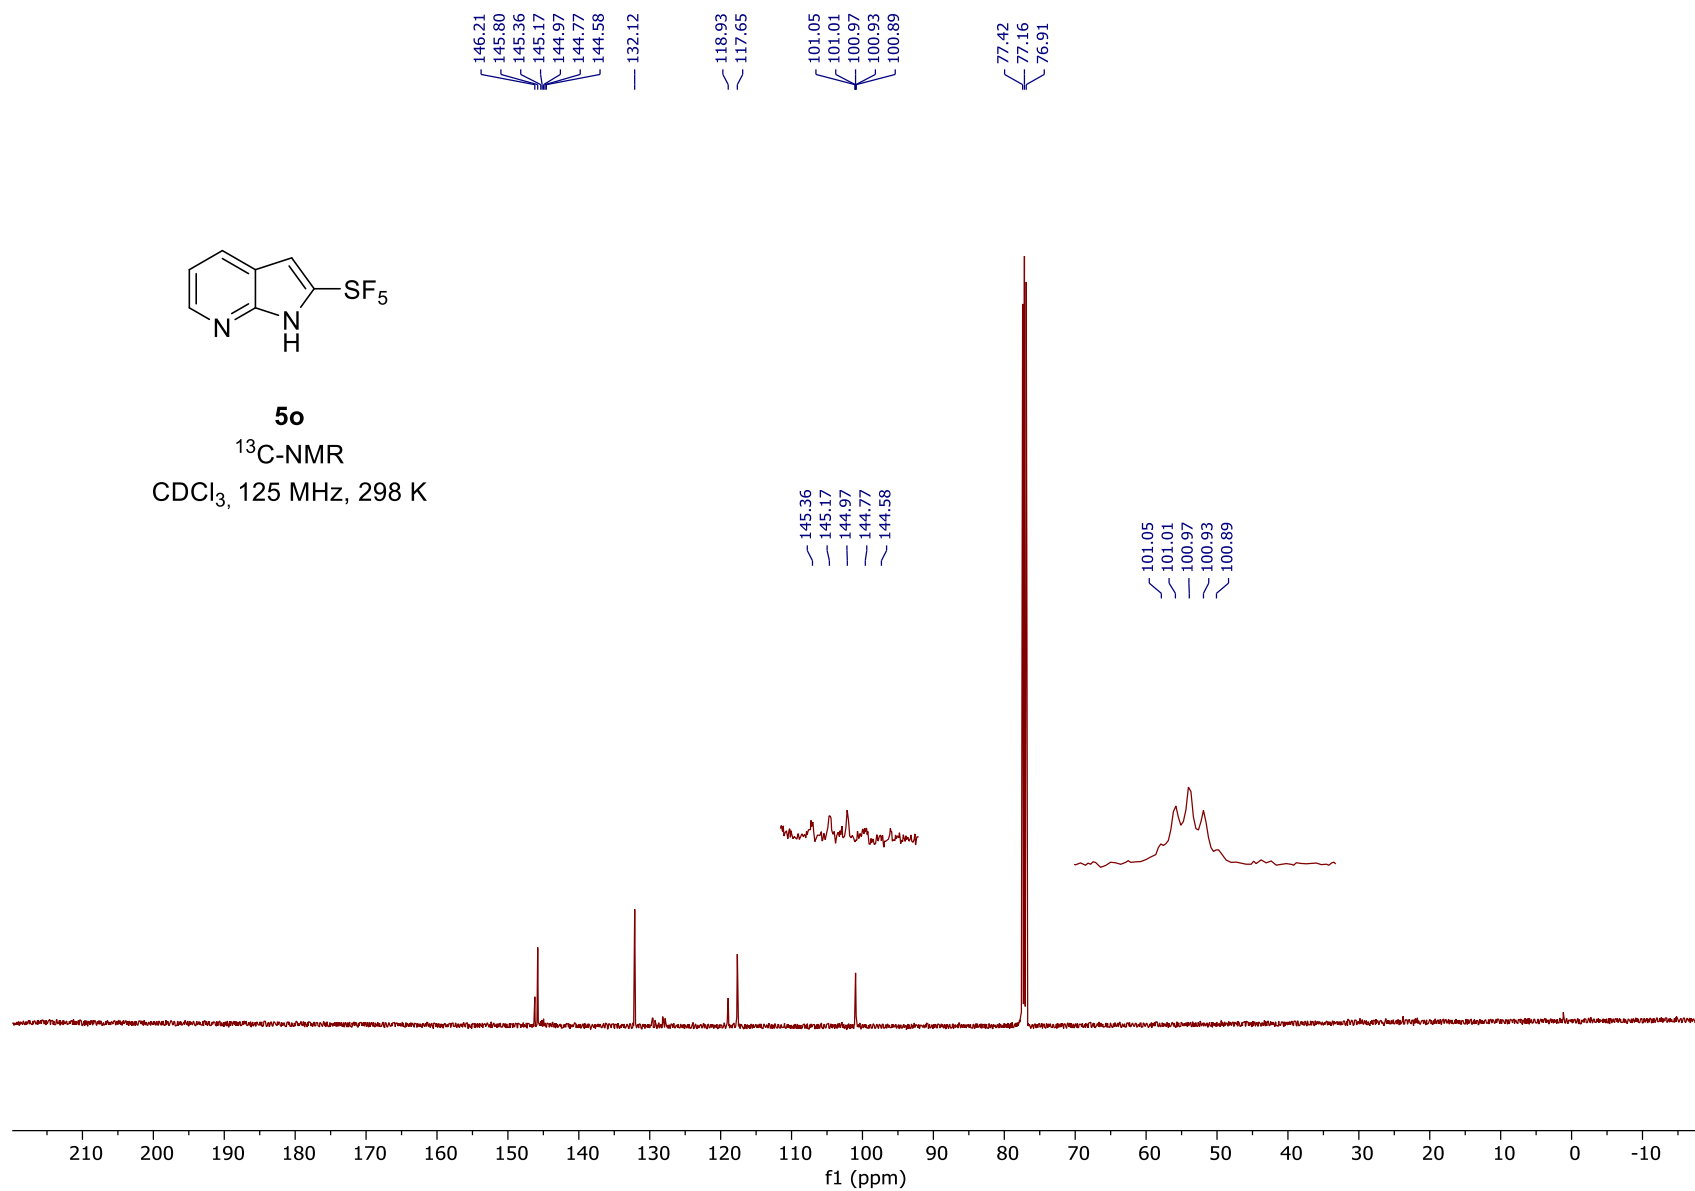

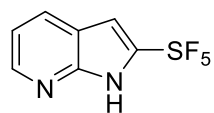**5o**<sup>19</sup>F-NMRCDCl<sub>3</sub>, 471 MHz, 298 K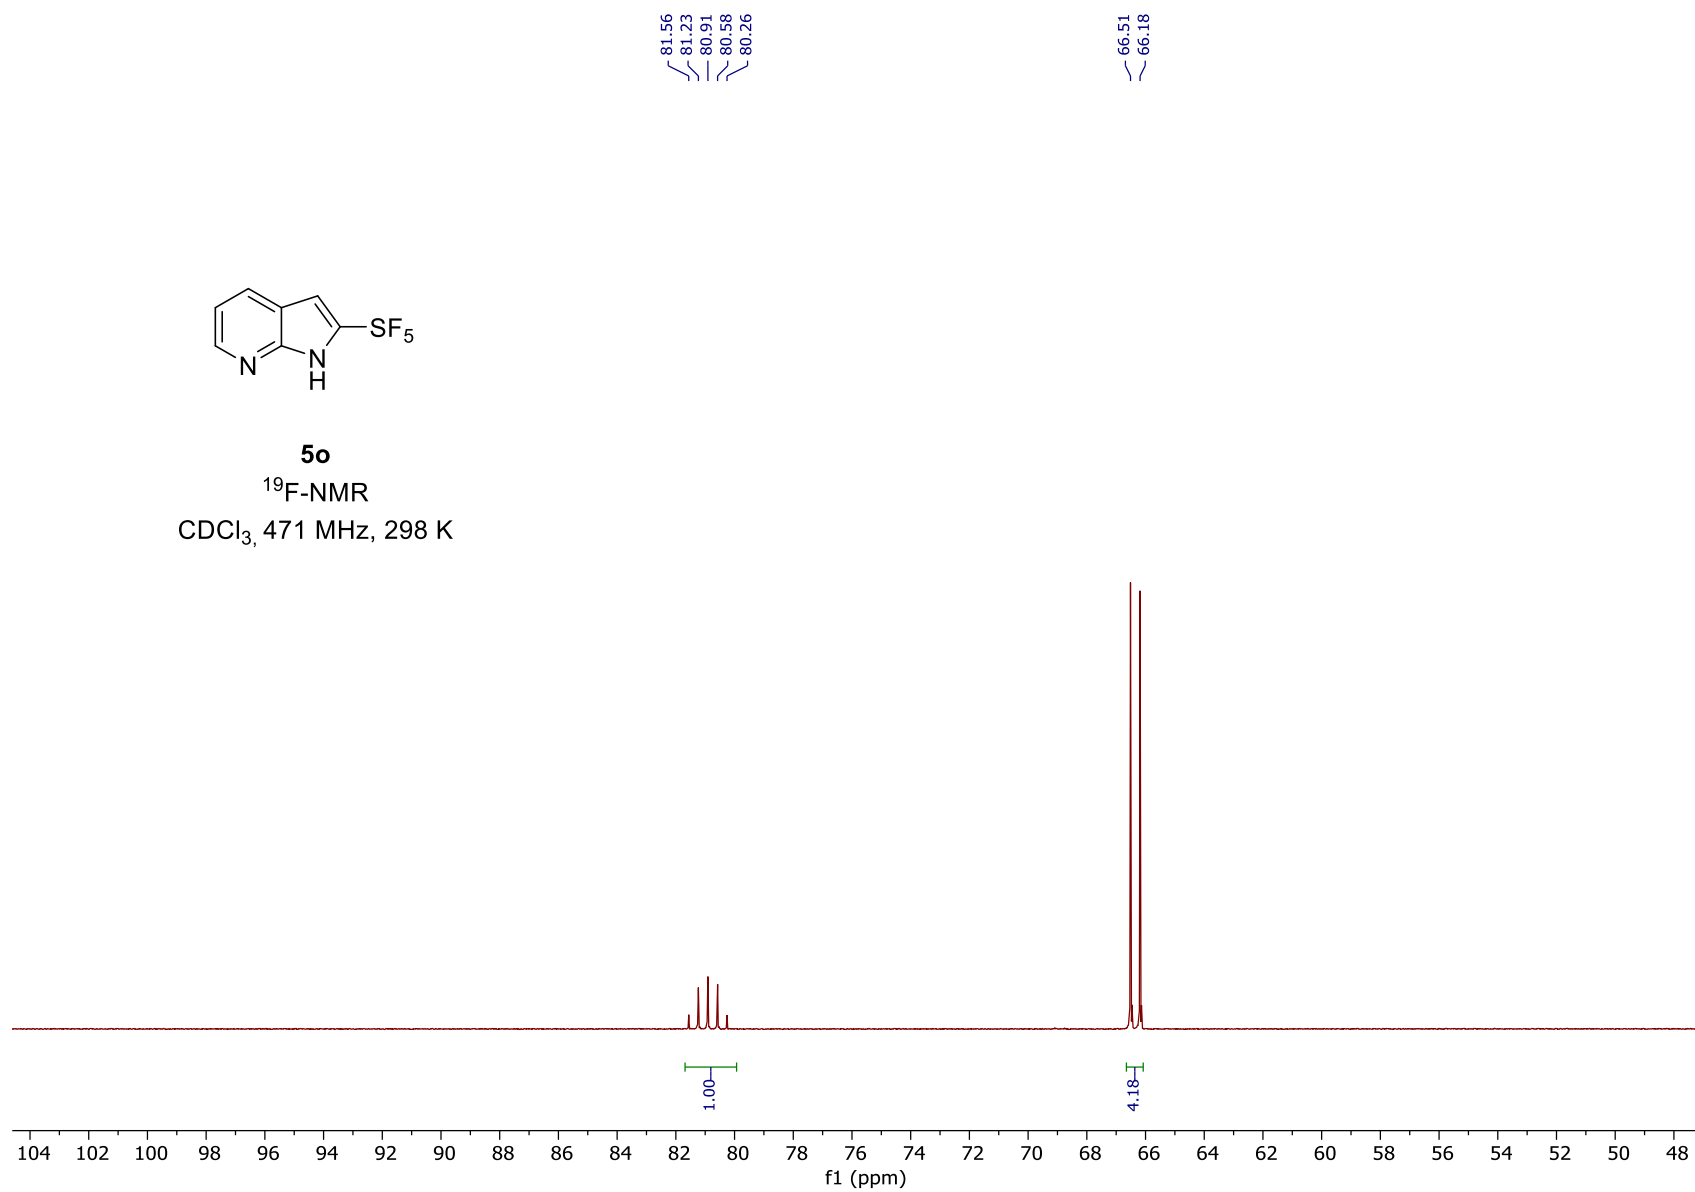



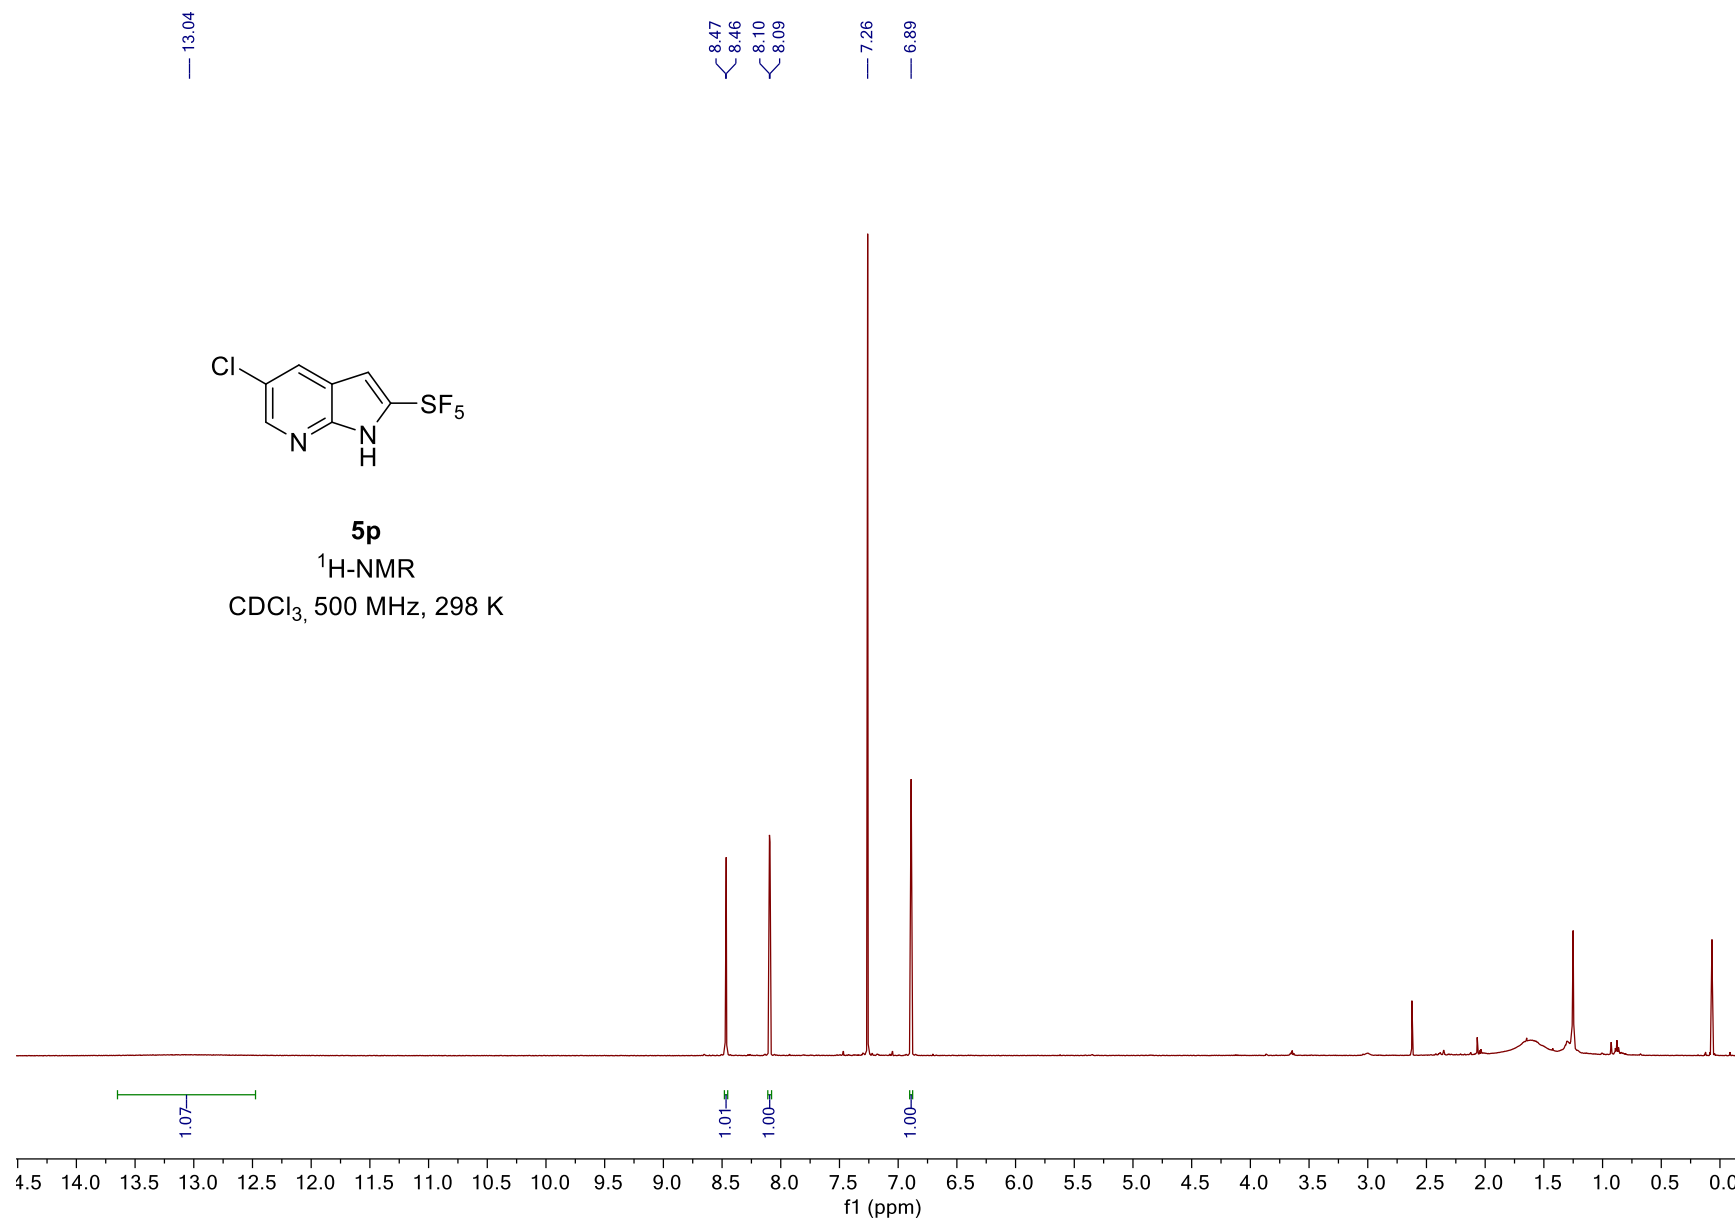

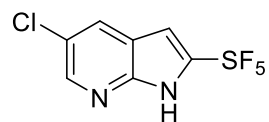**5p**<sup>13</sup>C-NMRCDCl<sub>3</sub>, 125 MHz, 298 K

146.52  
146.31  
146.10  
145.90  
145.70  
144.41  
— 131.07  
— 125.56  
— 119.43  
100.79  
100.75  
100.71  
100.67  
100.63  
77.41  
77.16  
76.91

— 146.52  
— 146.31  
— 146.10  
— 145.90  
— 145.70

100.79  
100.75  
100.71  
100.67  
100.63

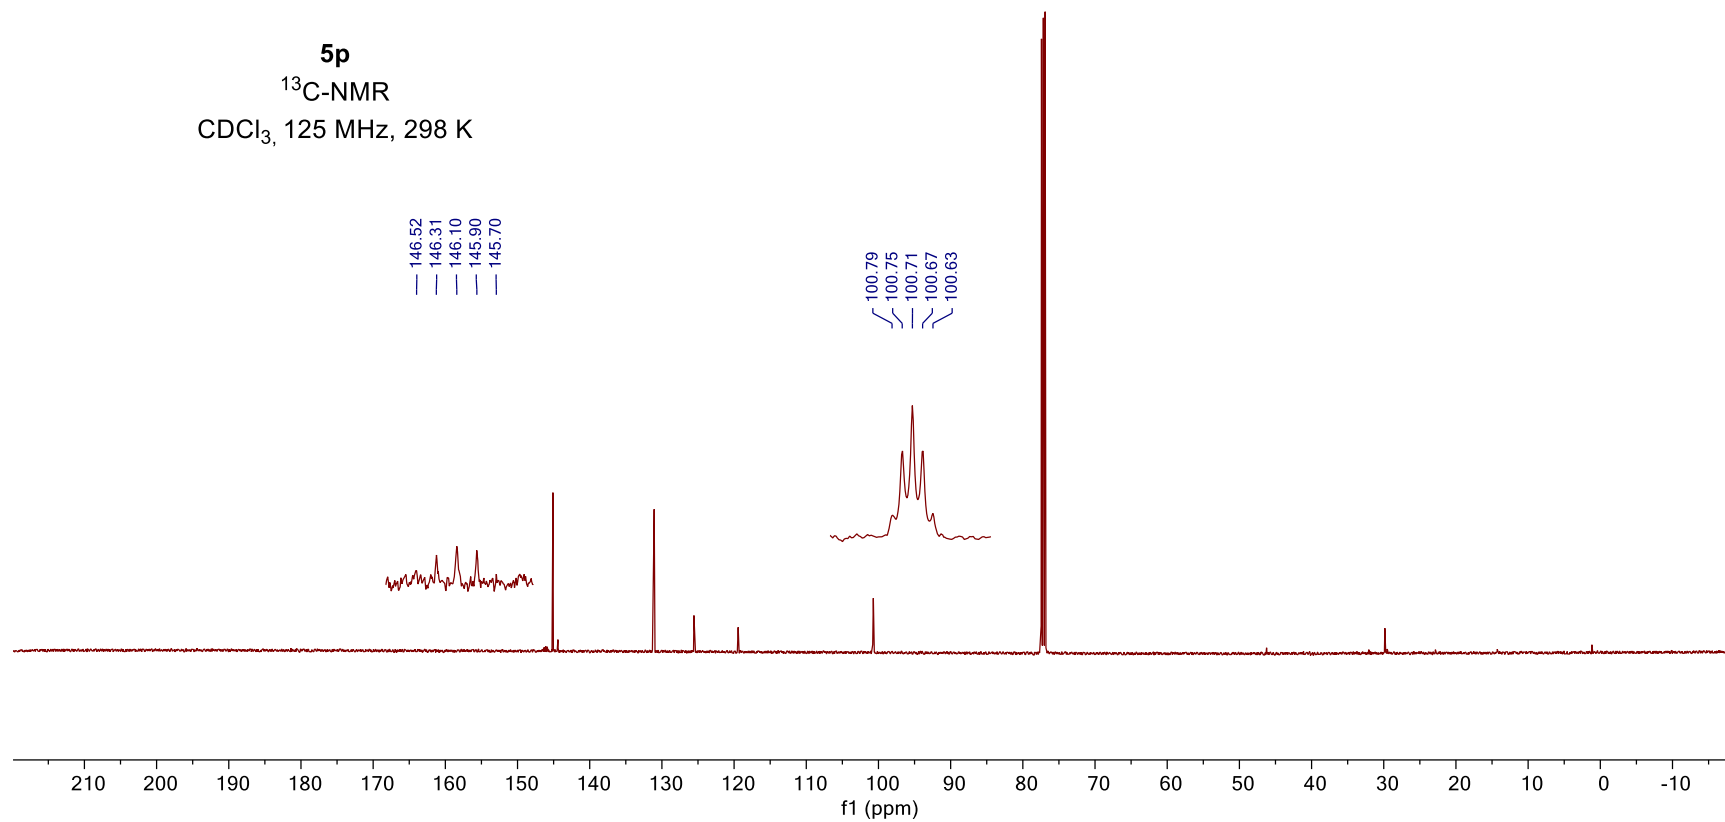

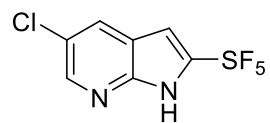**5p**<sup>19</sup>F-NMRCDCl<sub>3</sub>, 471 MHz, 298 K

80.70  
80.38  
80.37  
80.06  
80.05  
80.04  
79.73  
79.72  
79.39

66.08  
65.75

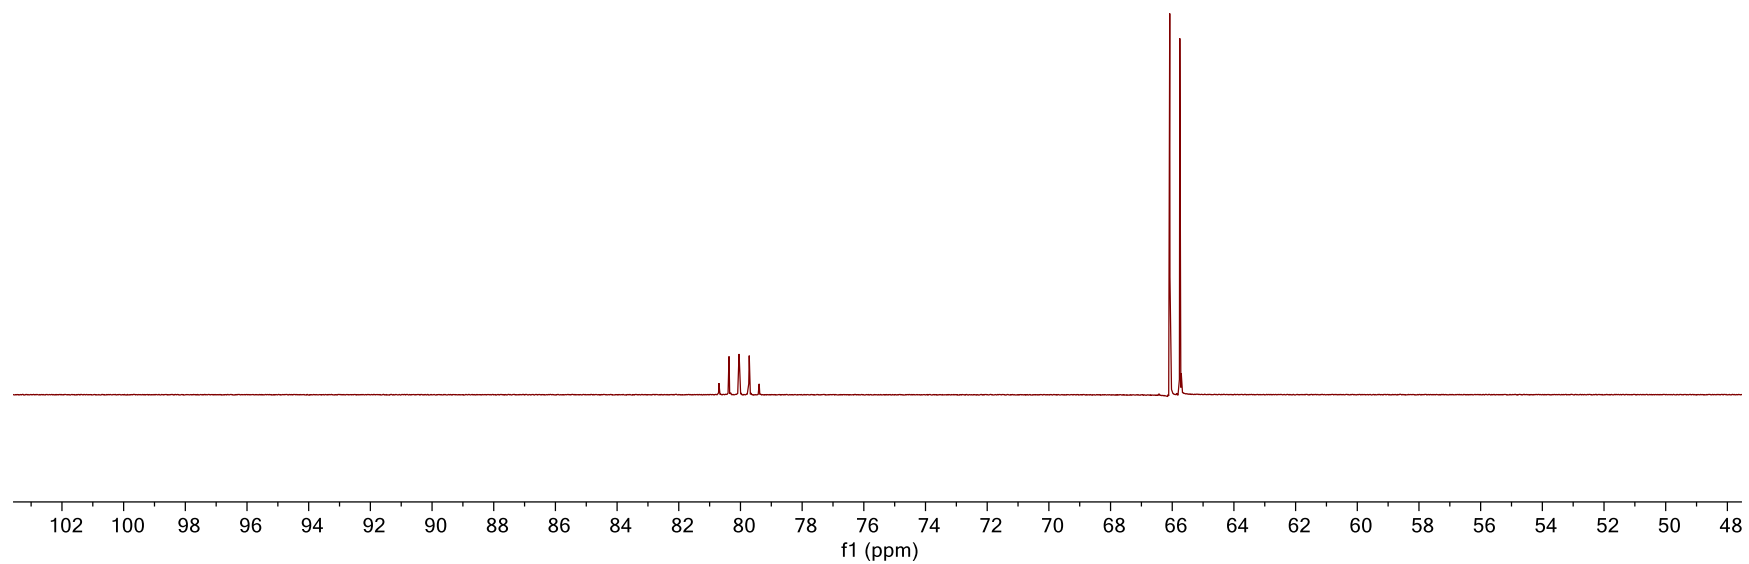

7.72  
7.72  
7.70  
7.70  
7.70  
7.32  
7.31  
7.30  
7.30  
7.29  
7.29  
7.28  
7.28  
7.22  
7.21  
7.21  
7.20  
7.20  
7.19  
7.18  
7.18  
7.13  
6.94  
6.94  
6.93  
6.92  
6.92  
6.92  
5.65

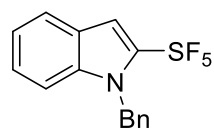

7

<sup>1</sup>H-NMR

CDCl<sub>3</sub>, 400 MHz, 298 K

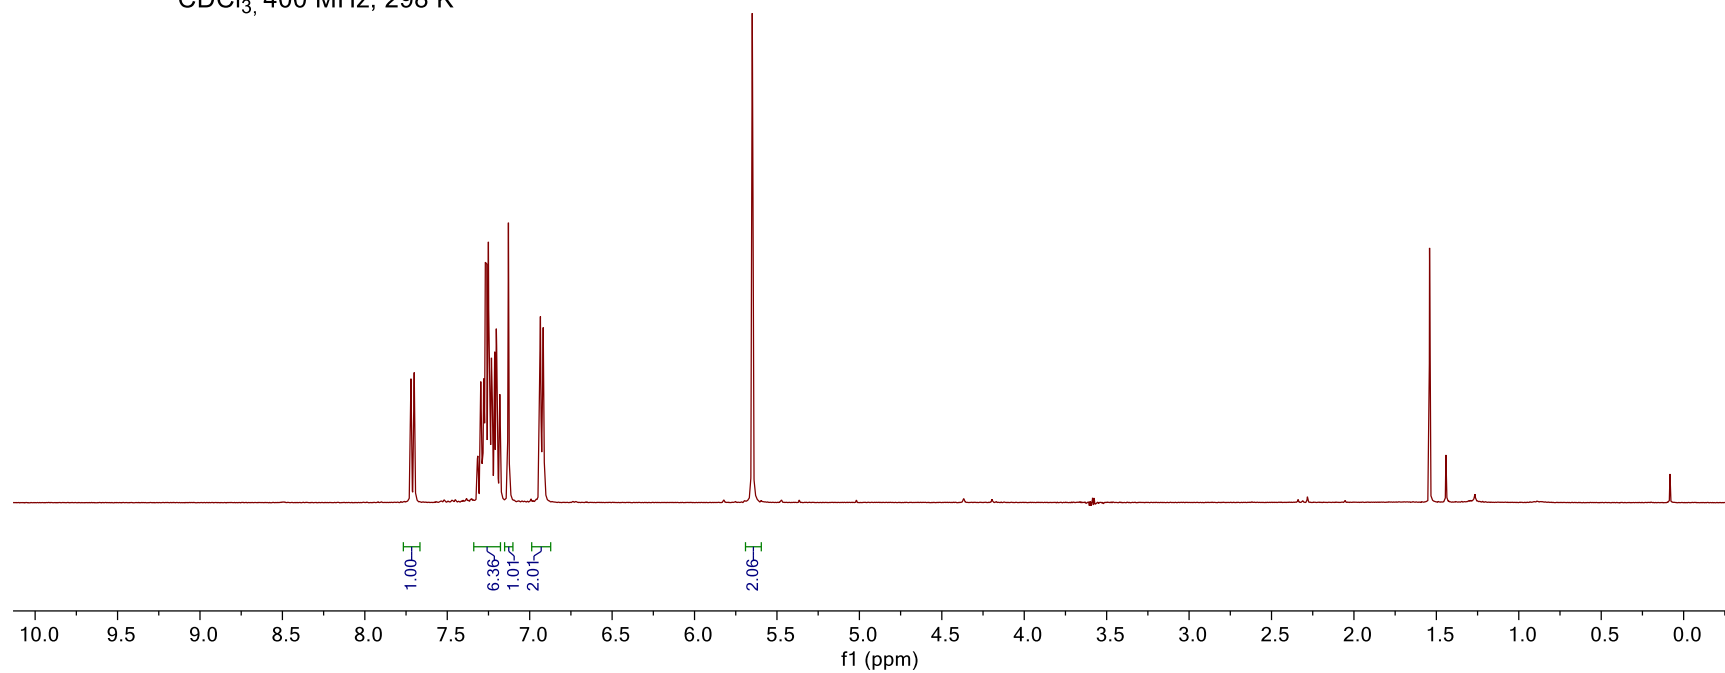

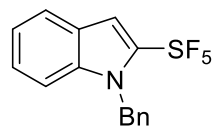

7

$^{13}\text{C-NMR}$   
 $\text{CDCl}_3$ , 125 MHz, 298 K

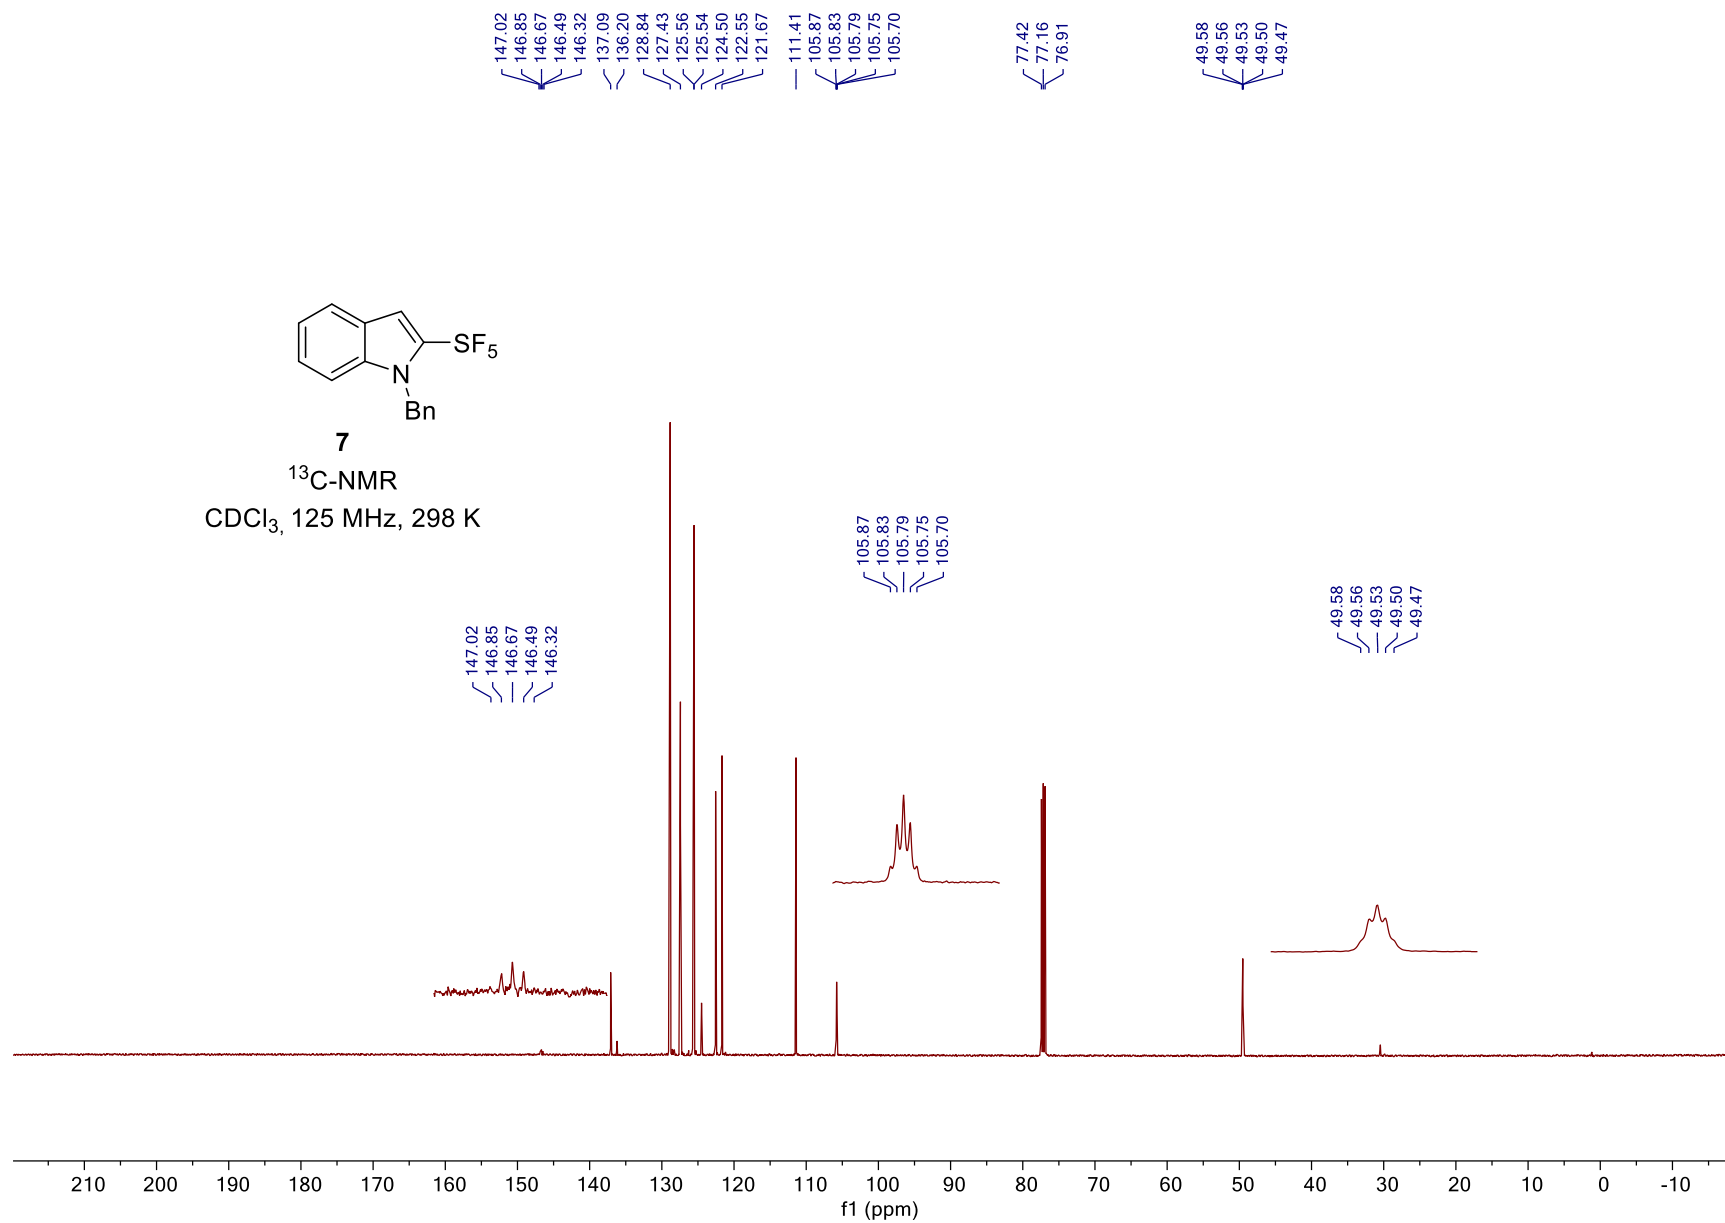

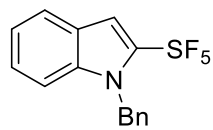**7**<sup>19</sup>F-NMRCDCl<sub>3</sub>, 471 MHz, 298 K

84.23  
83.91  
83.89  
83.59  
83.57  
83.56  
83.26  
83.24  
82.92

72.98  
72.65

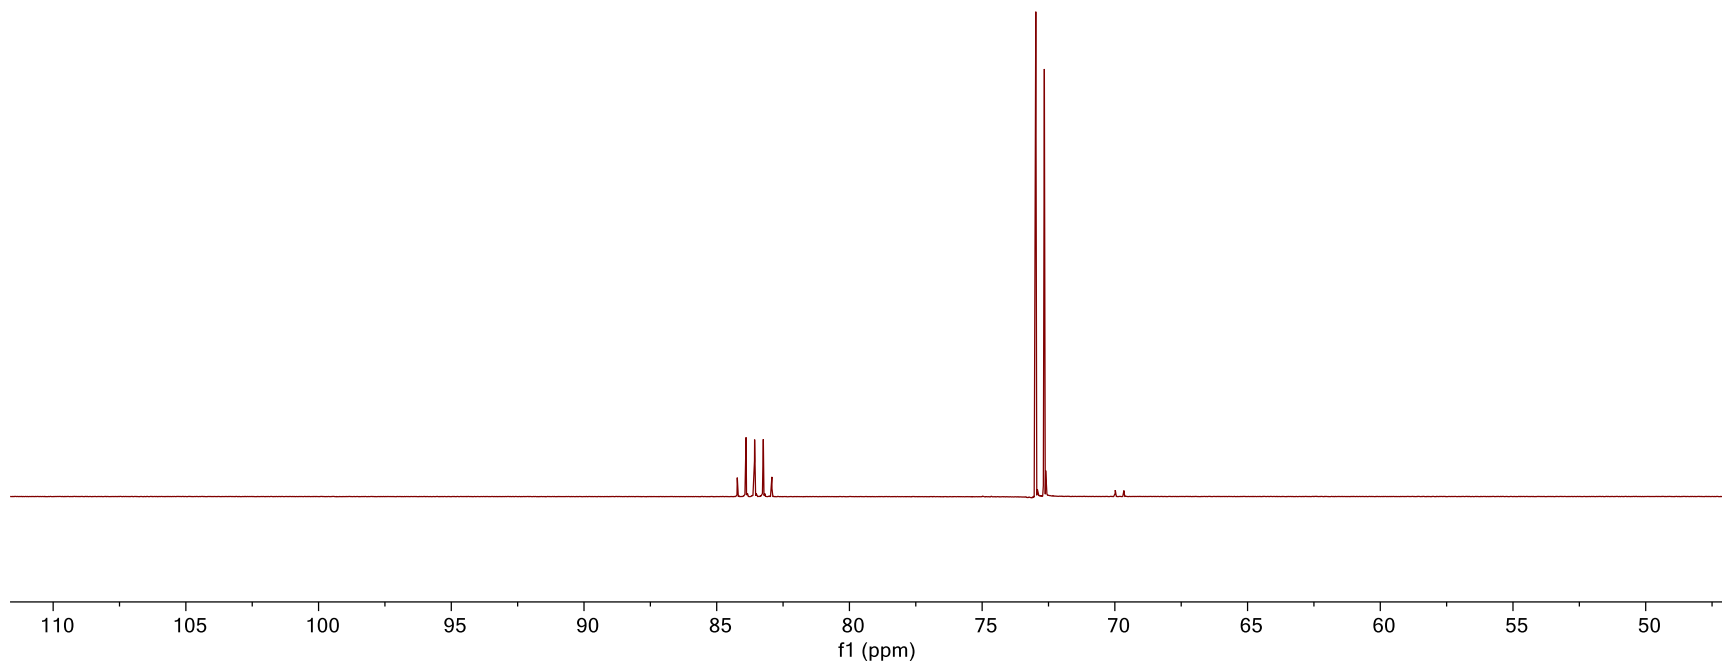

7.67  
7.66  
7.42  
7.40  
7.39  
7.38  
7.26  
7.23  
7.22  
7.21  
7.20  
7.20  
7.03

3.94

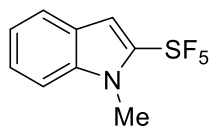

**8**

<sup>1</sup>H-NMR

CDCl<sub>3</sub>, 500 MHz, 298 K

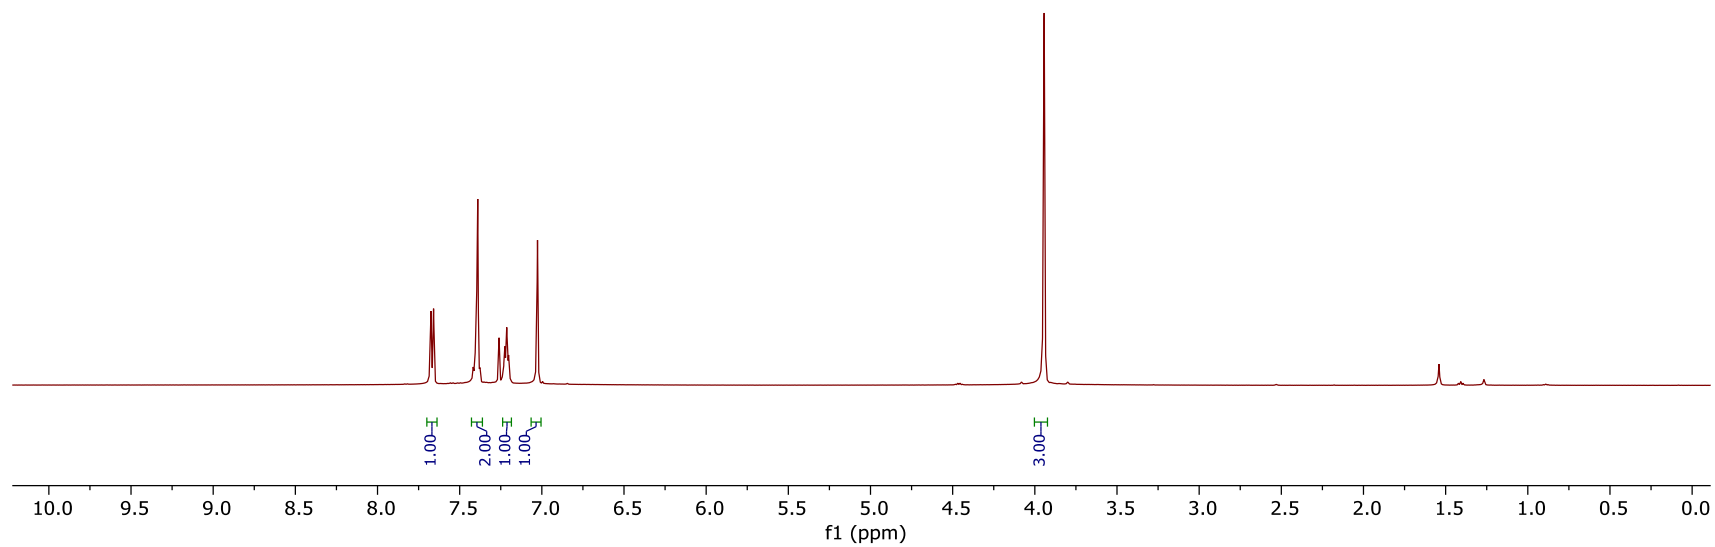

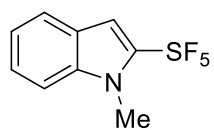**8**

$^{13}\text{C}$ -NMR  
CDCl<sub>3</sub>, 125 MHz, 298 K

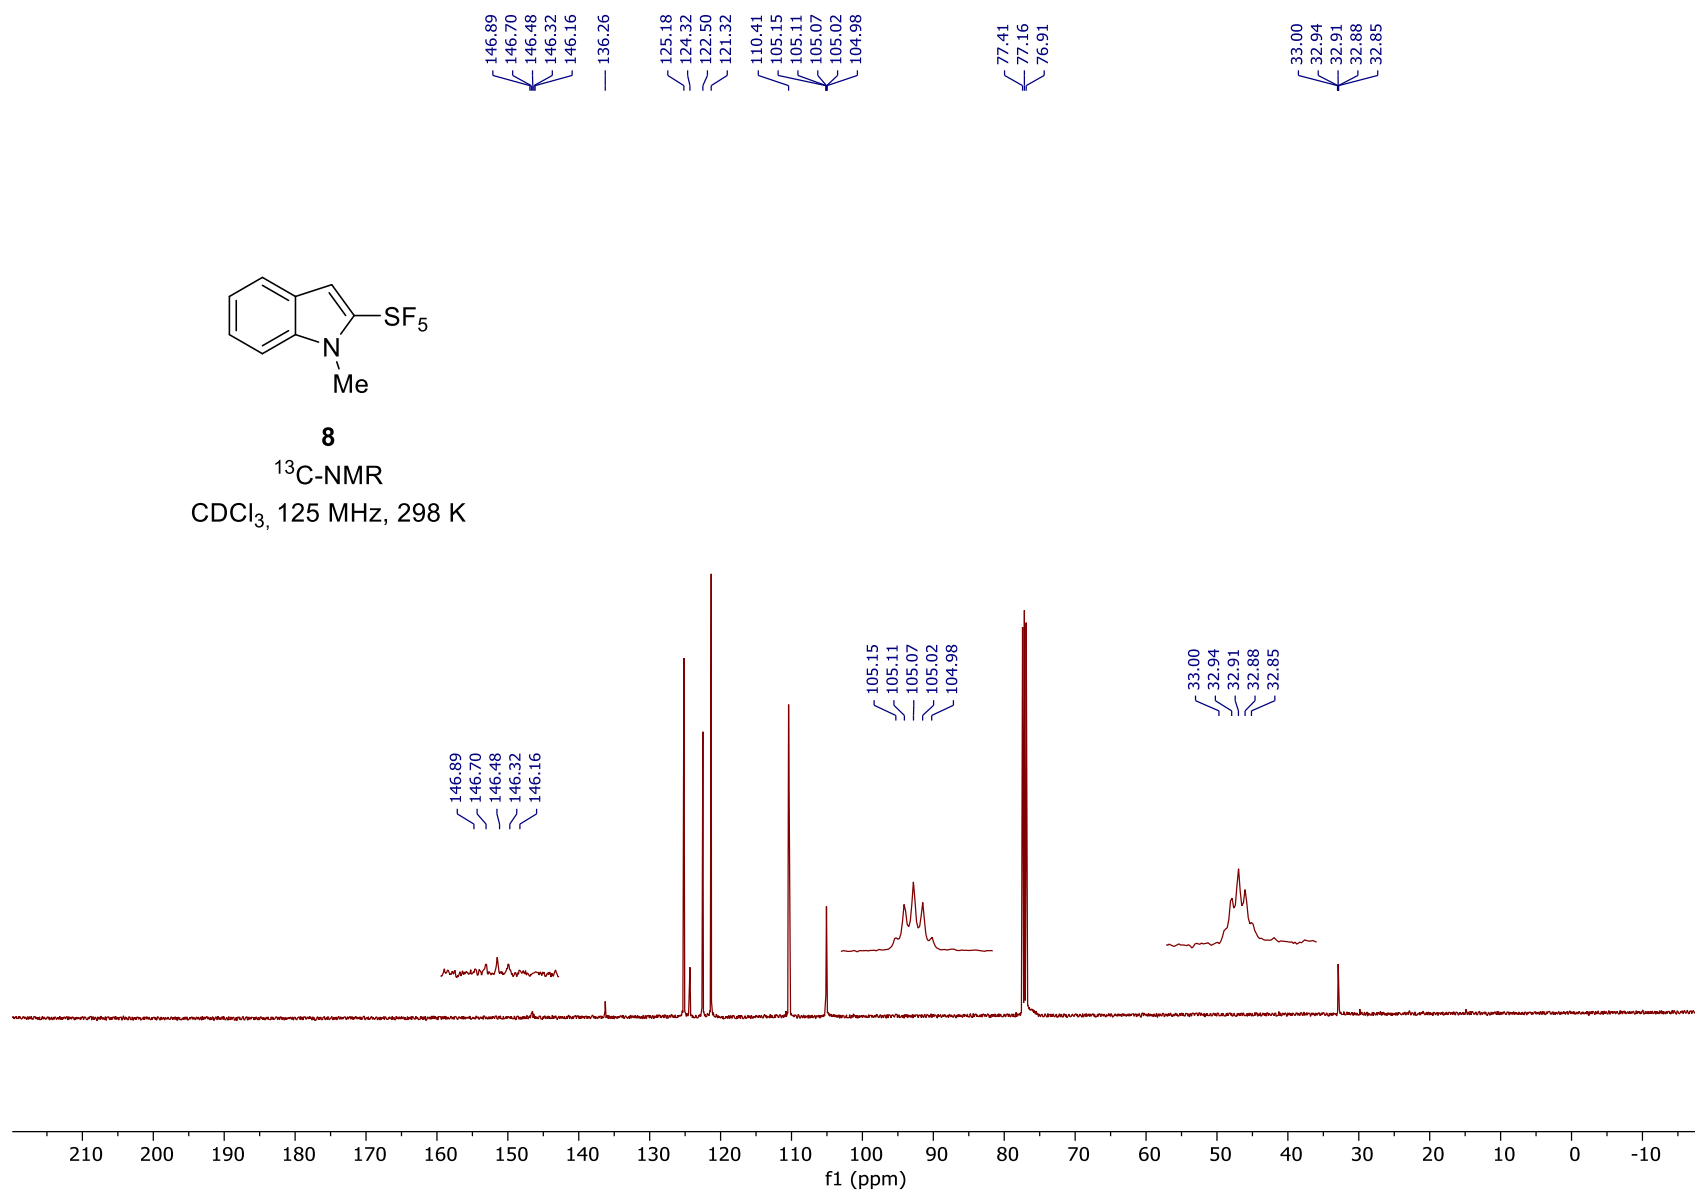



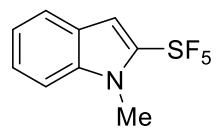**8**<sup>19</sup>F-NMR  
CDCl<sub>3</sub>, 471 MHz, 298 K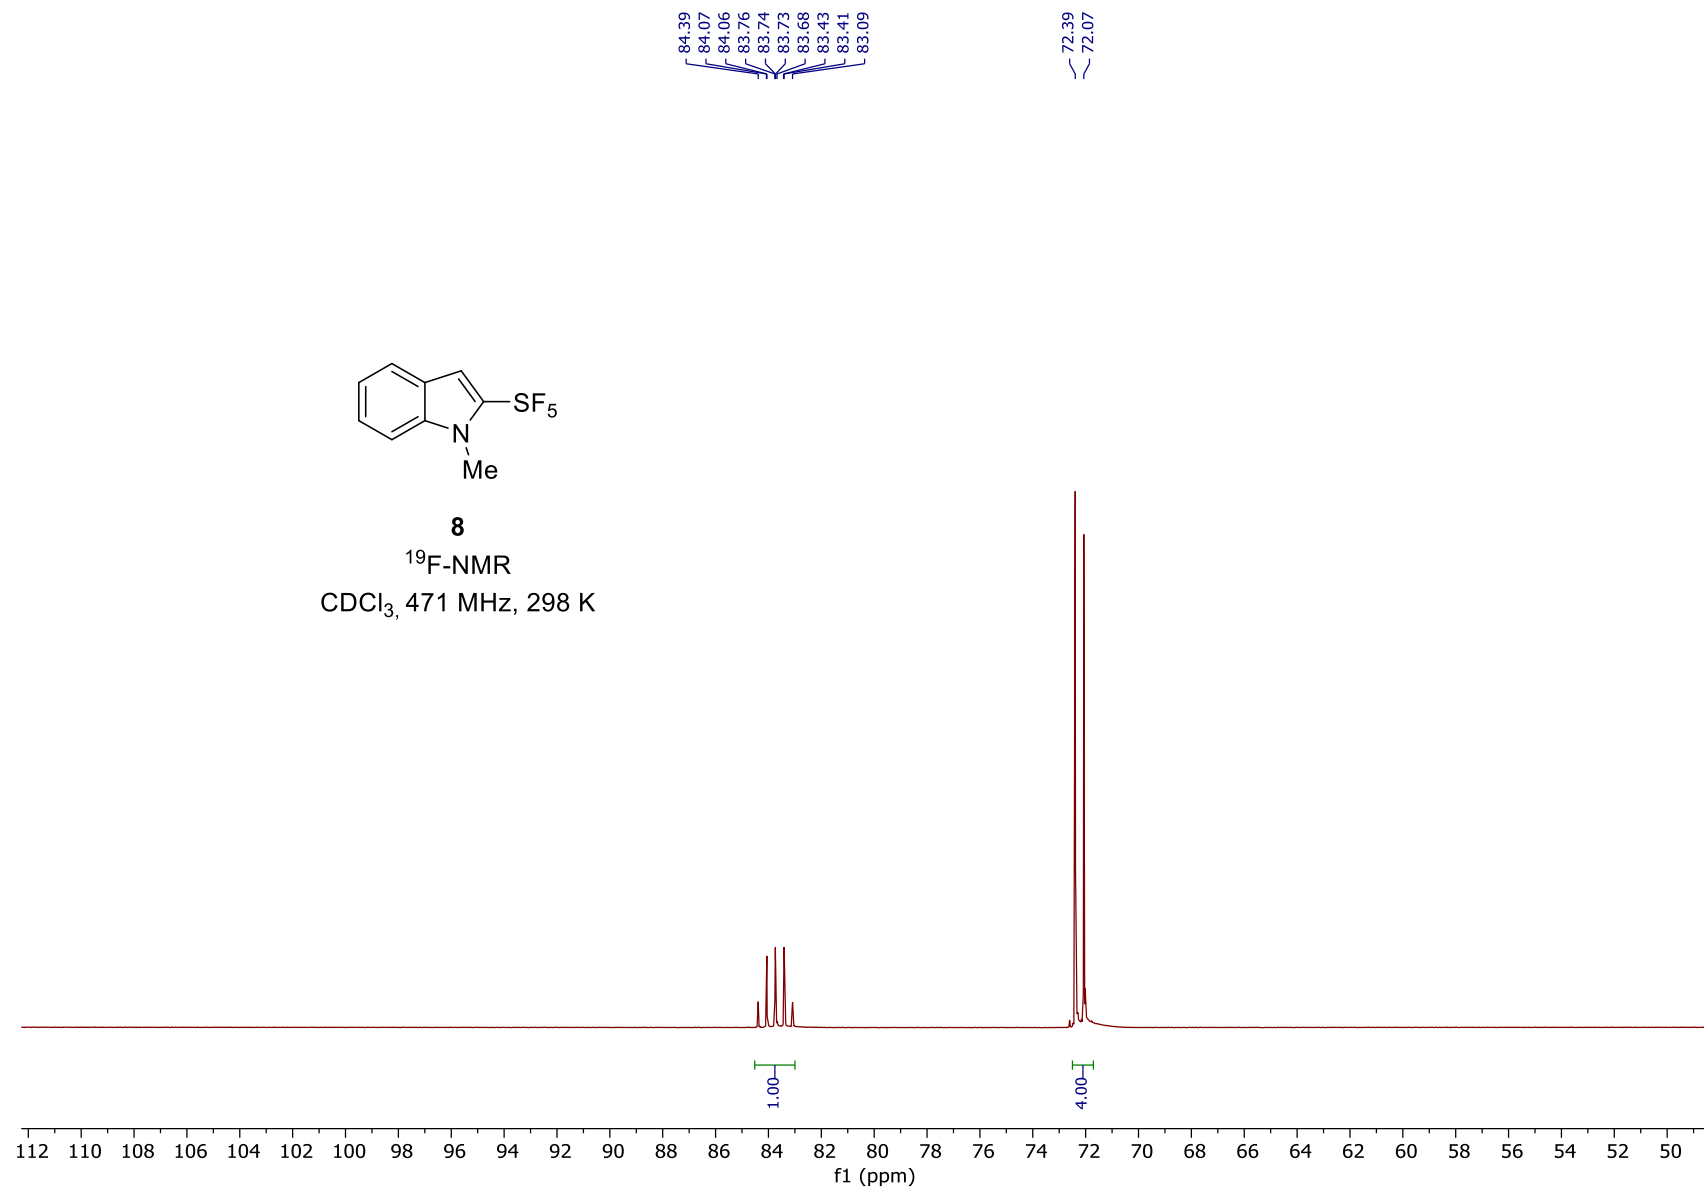

7.74  
7.74  
7.74  
7.72  
7.72  
7.72  
7.67  
7.67  
7.65  
7.65  
7.57  
7.57  
7.55  
7.55  
7.54  
7.54  
7.49  
7.49  
7.48  
7.48  
7.46  
7.46  
7.26

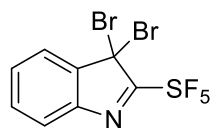

**9**

<sup>1</sup>H-NMR

CDCl<sub>3</sub>, 500 MHz, 298 K

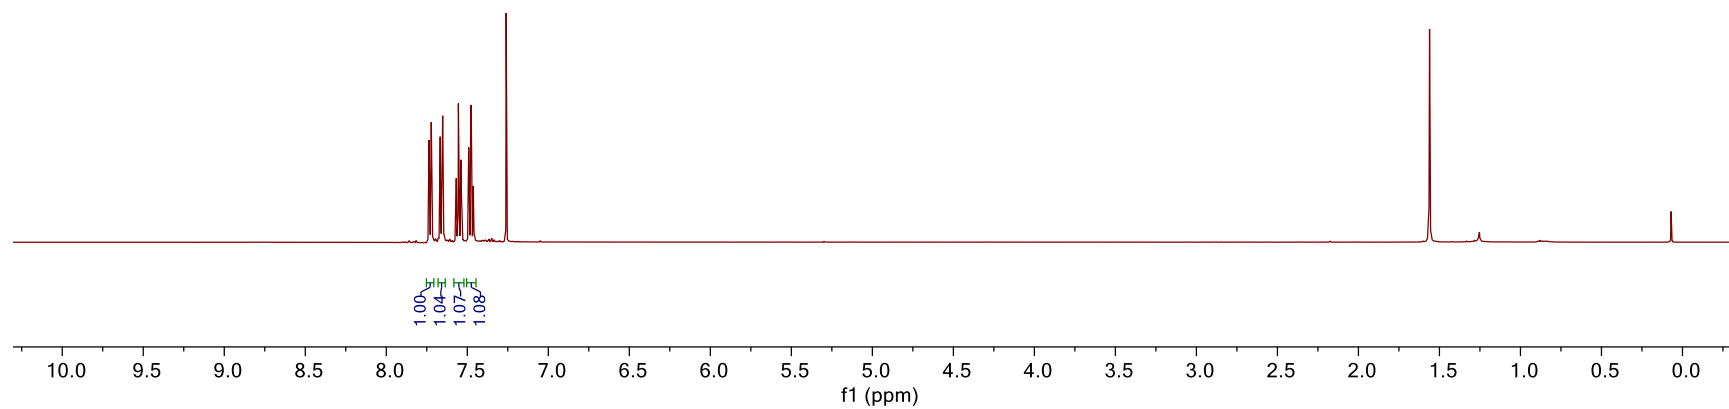

178.48  
178.30  
178.12

142.48  
141.18

131.58  
131.41

124.04  
123.99

77.41  
77.16  
76.91

43.31

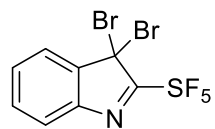**9**<sup>13</sup>C-NMRCDCl<sub>3</sub>, 125 MHz, 298 K

178.48  
178.30  
178.12

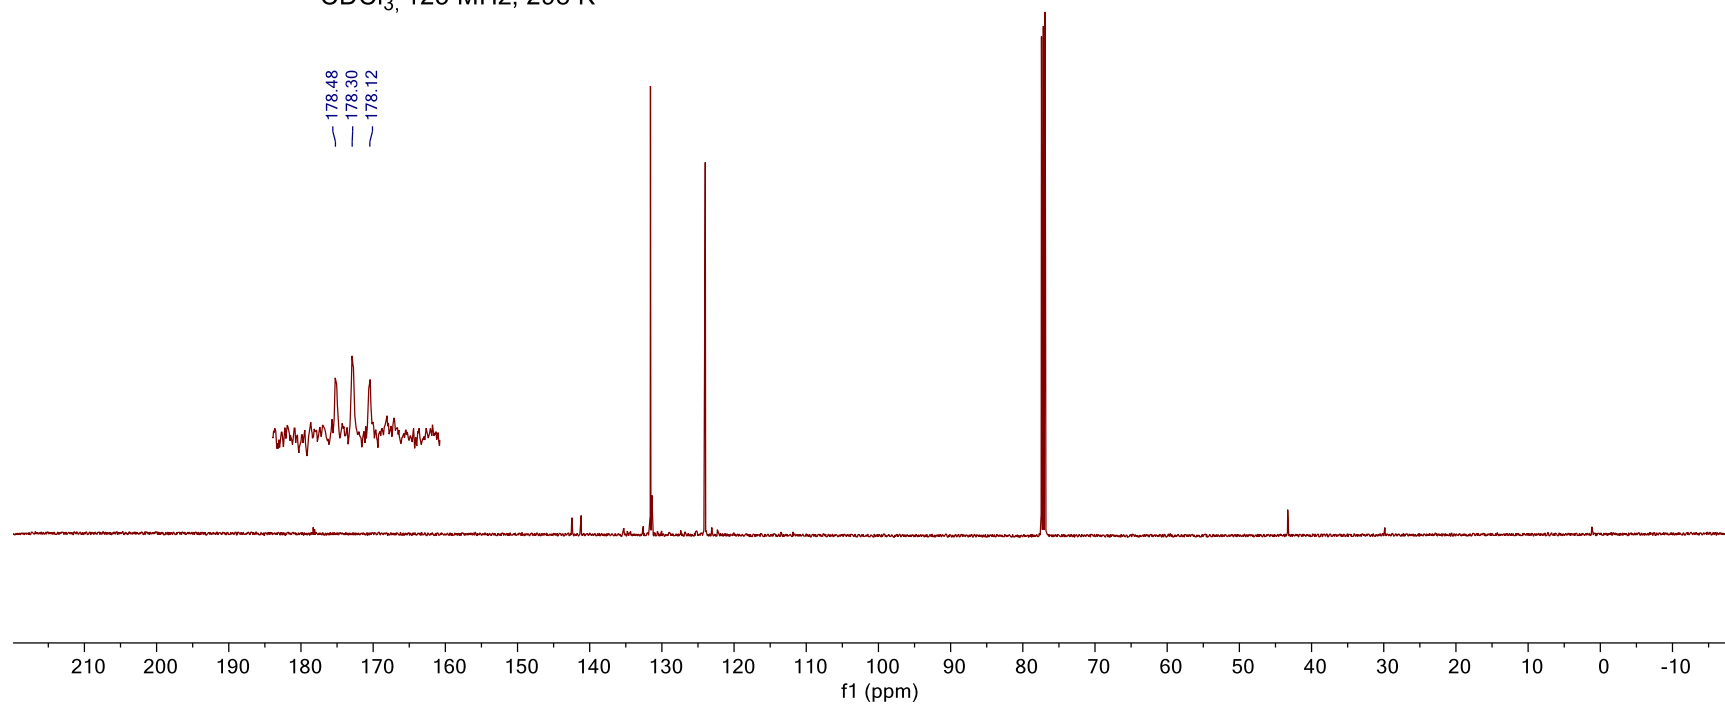

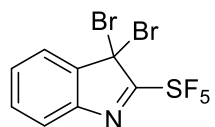**9**

$^{19}\text{F}$ -NMR  
 $\text{CDCl}_3$ , 471 MHz, 298 K

74.65  
74.34  
74.32  
74.01  
73.99  
73.98  
73.68  
73.66  
73.34

63.78  
63.45

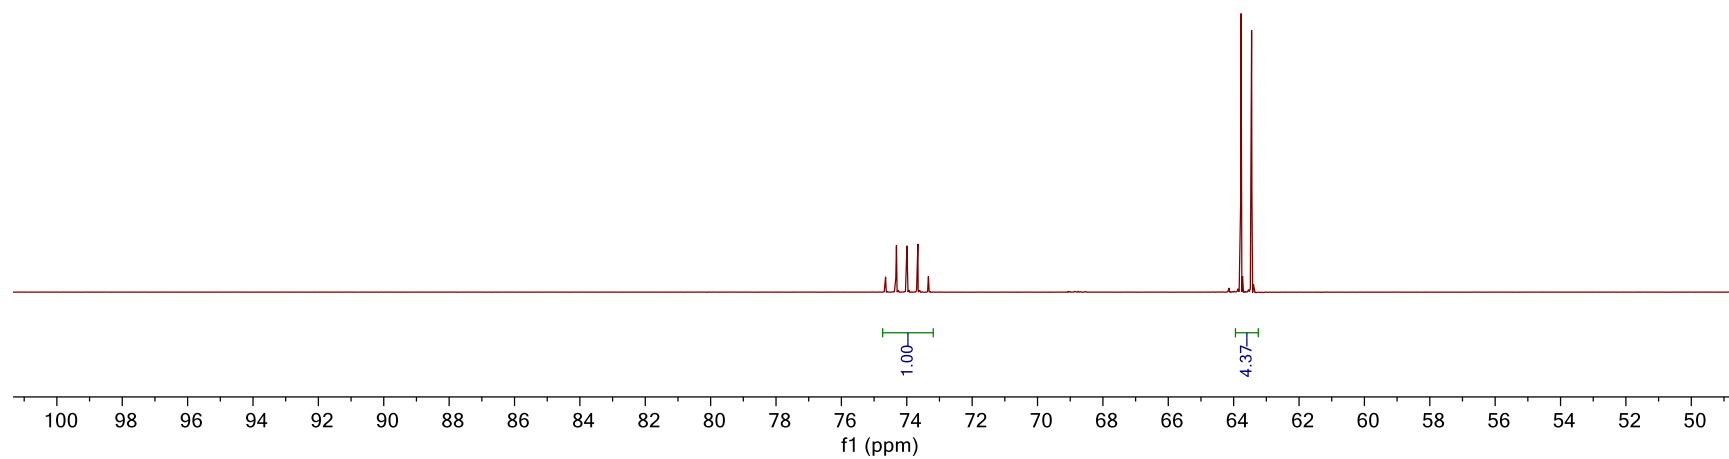

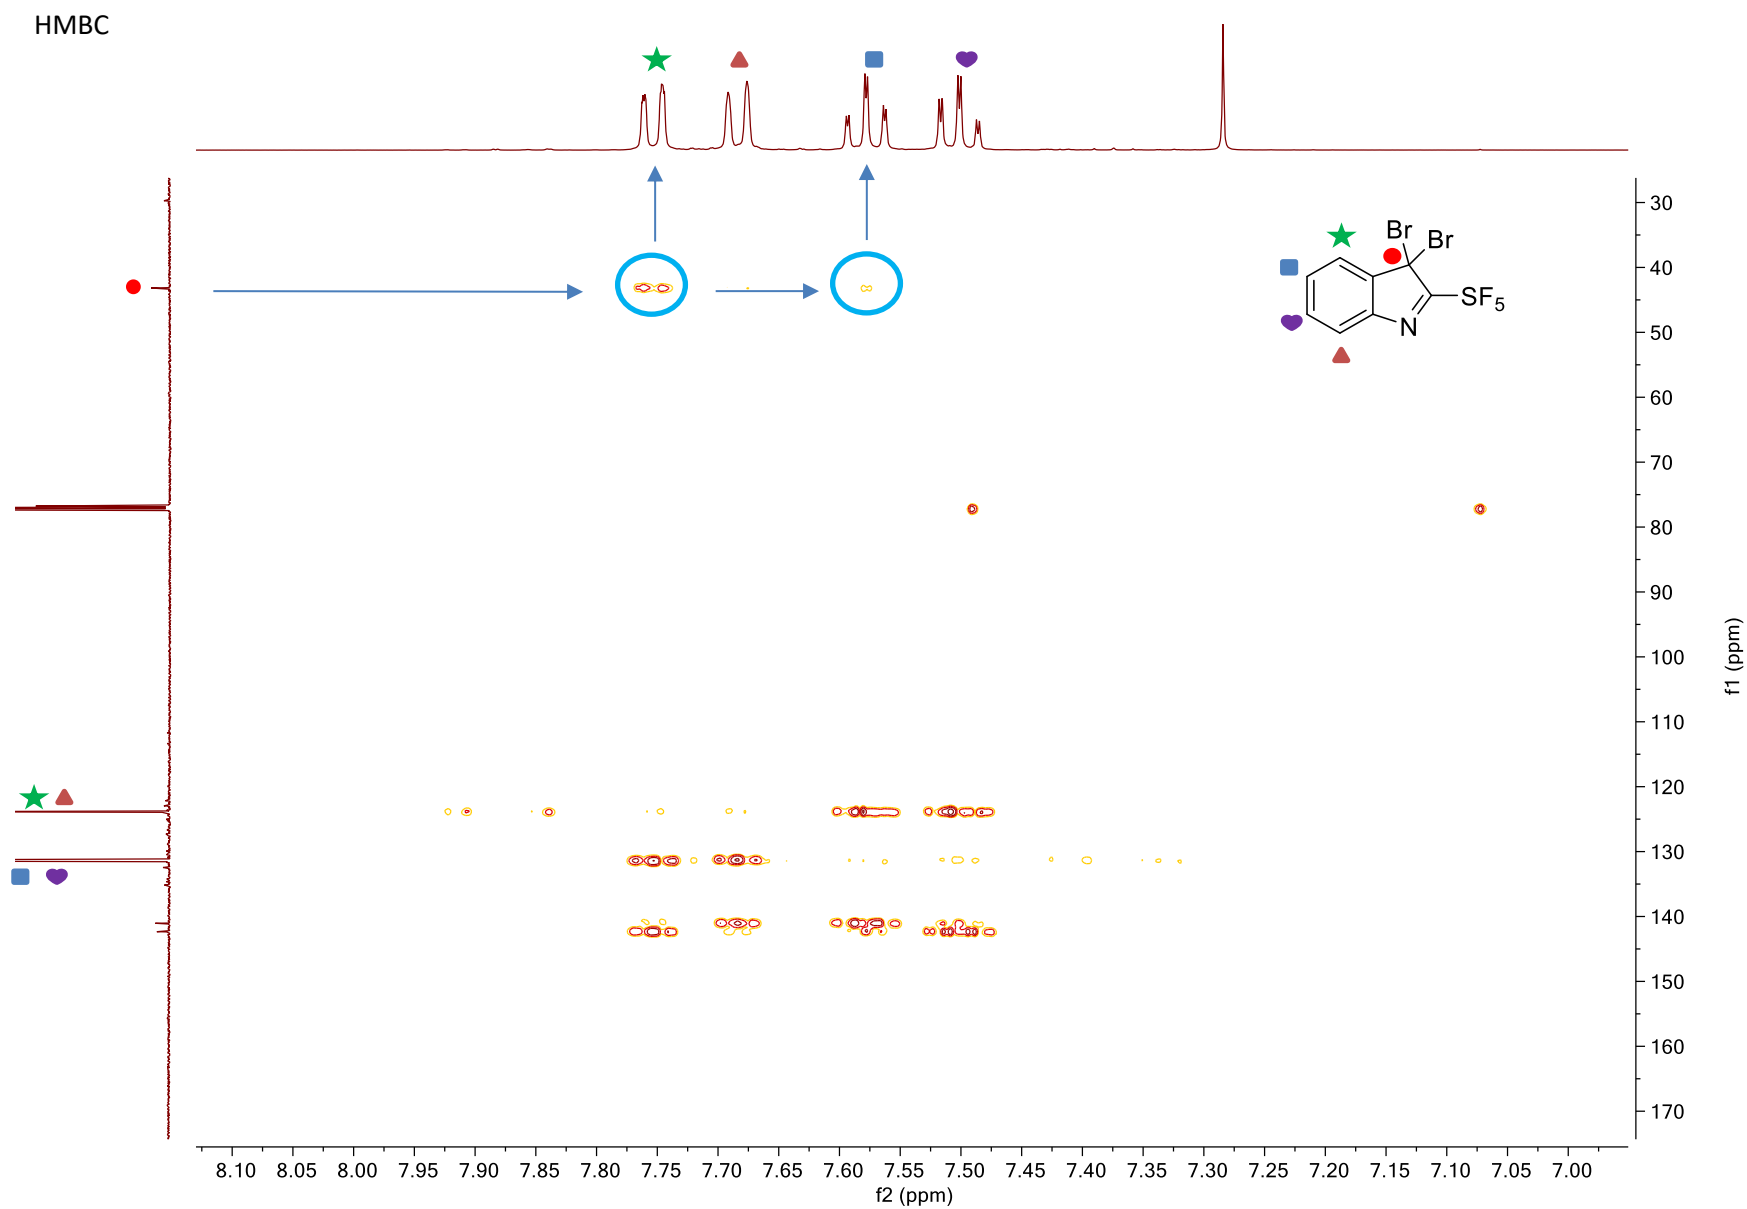

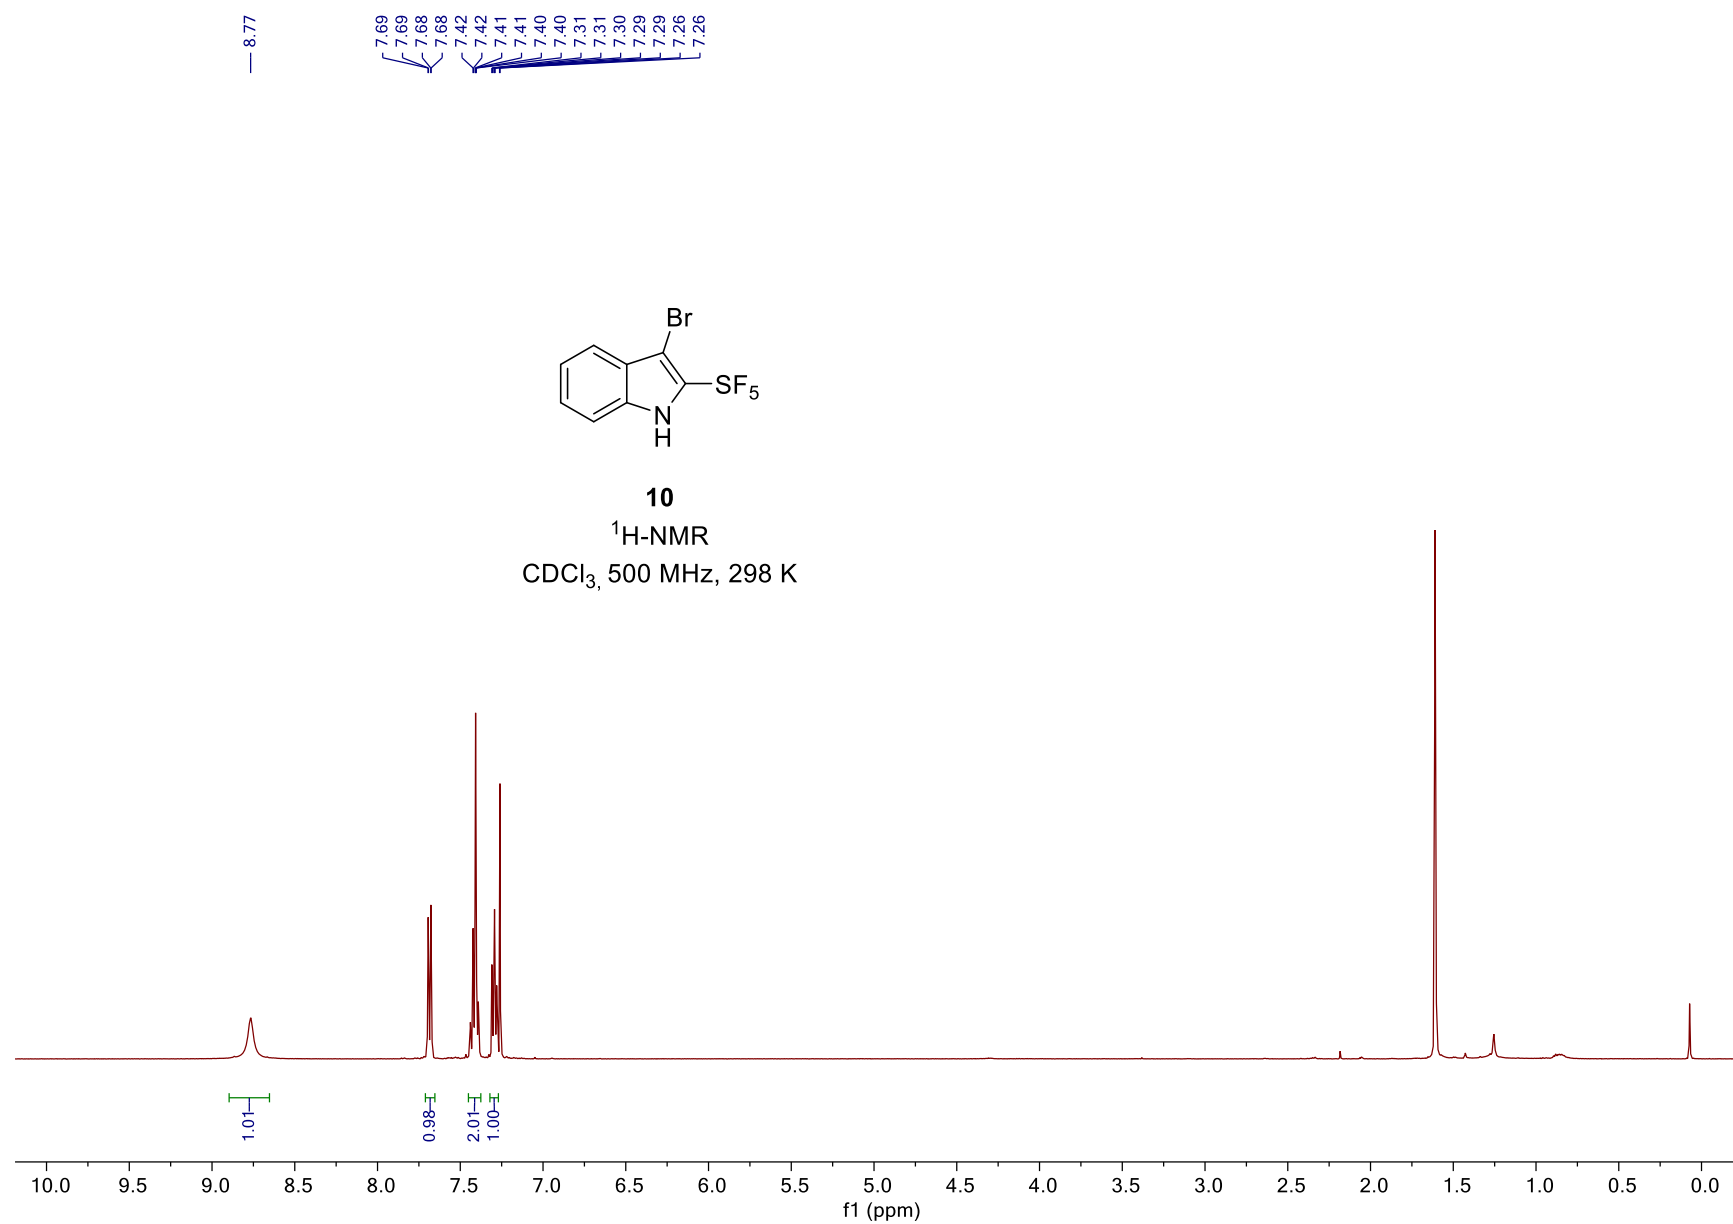

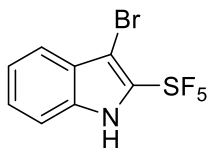**10**<sup>13</sup>C-NMRCDCl<sub>3</sub>, 125 MHz, 298 K

142.39  
142.21  
142.02  
— 132.91  
126.80  
125.84  
122.30  
121.58  
— 111.82  
91.84  
91.82  
91.79  
91.76  
91.73  
77.41  
77.16  
76.91

142.39  
142.21  
142.02

91.84  
91.82  
91.79  
91.76  
91.73

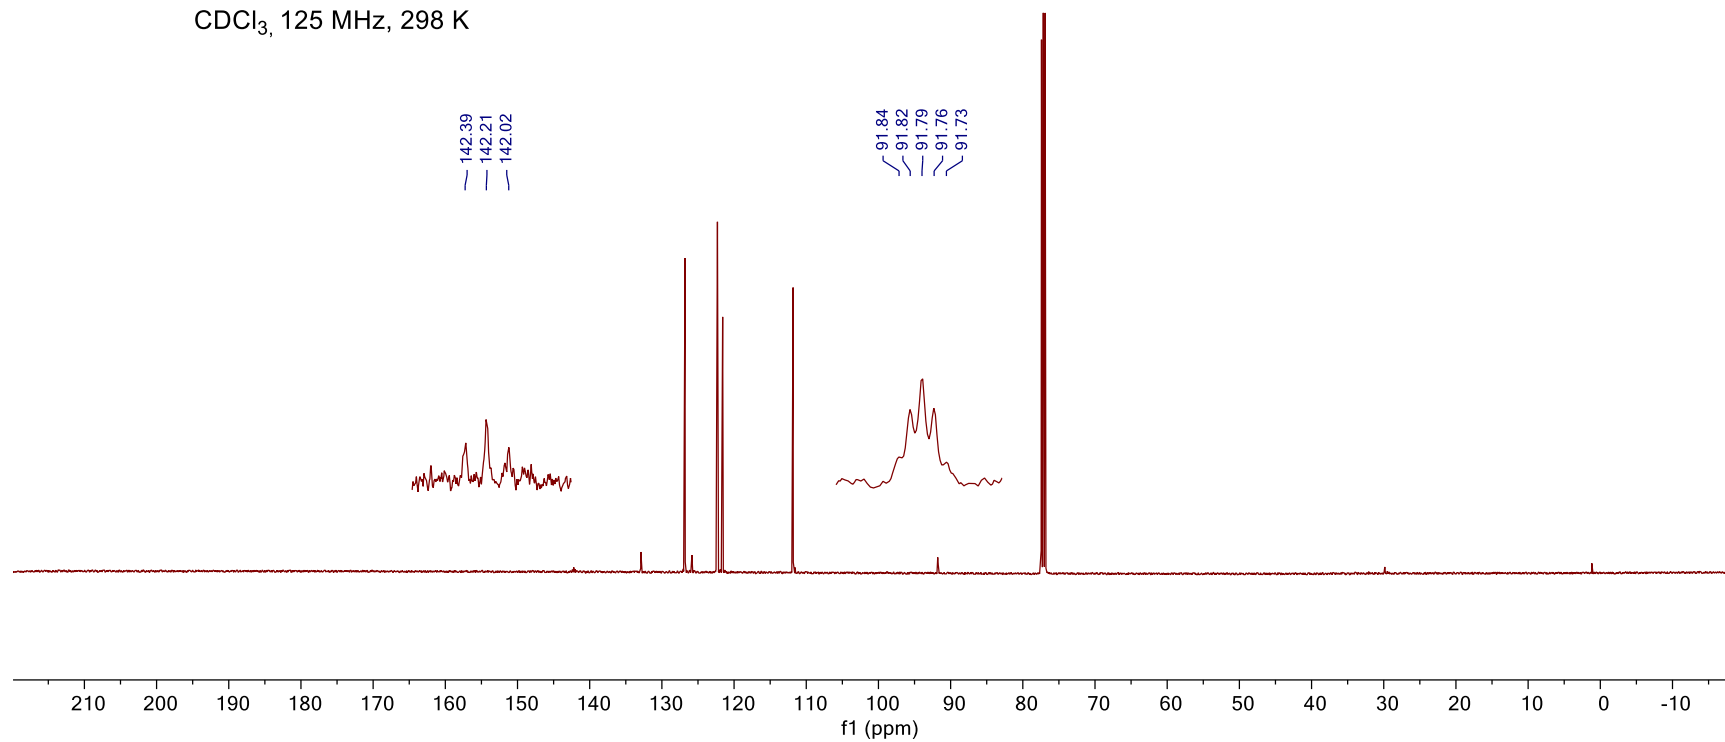

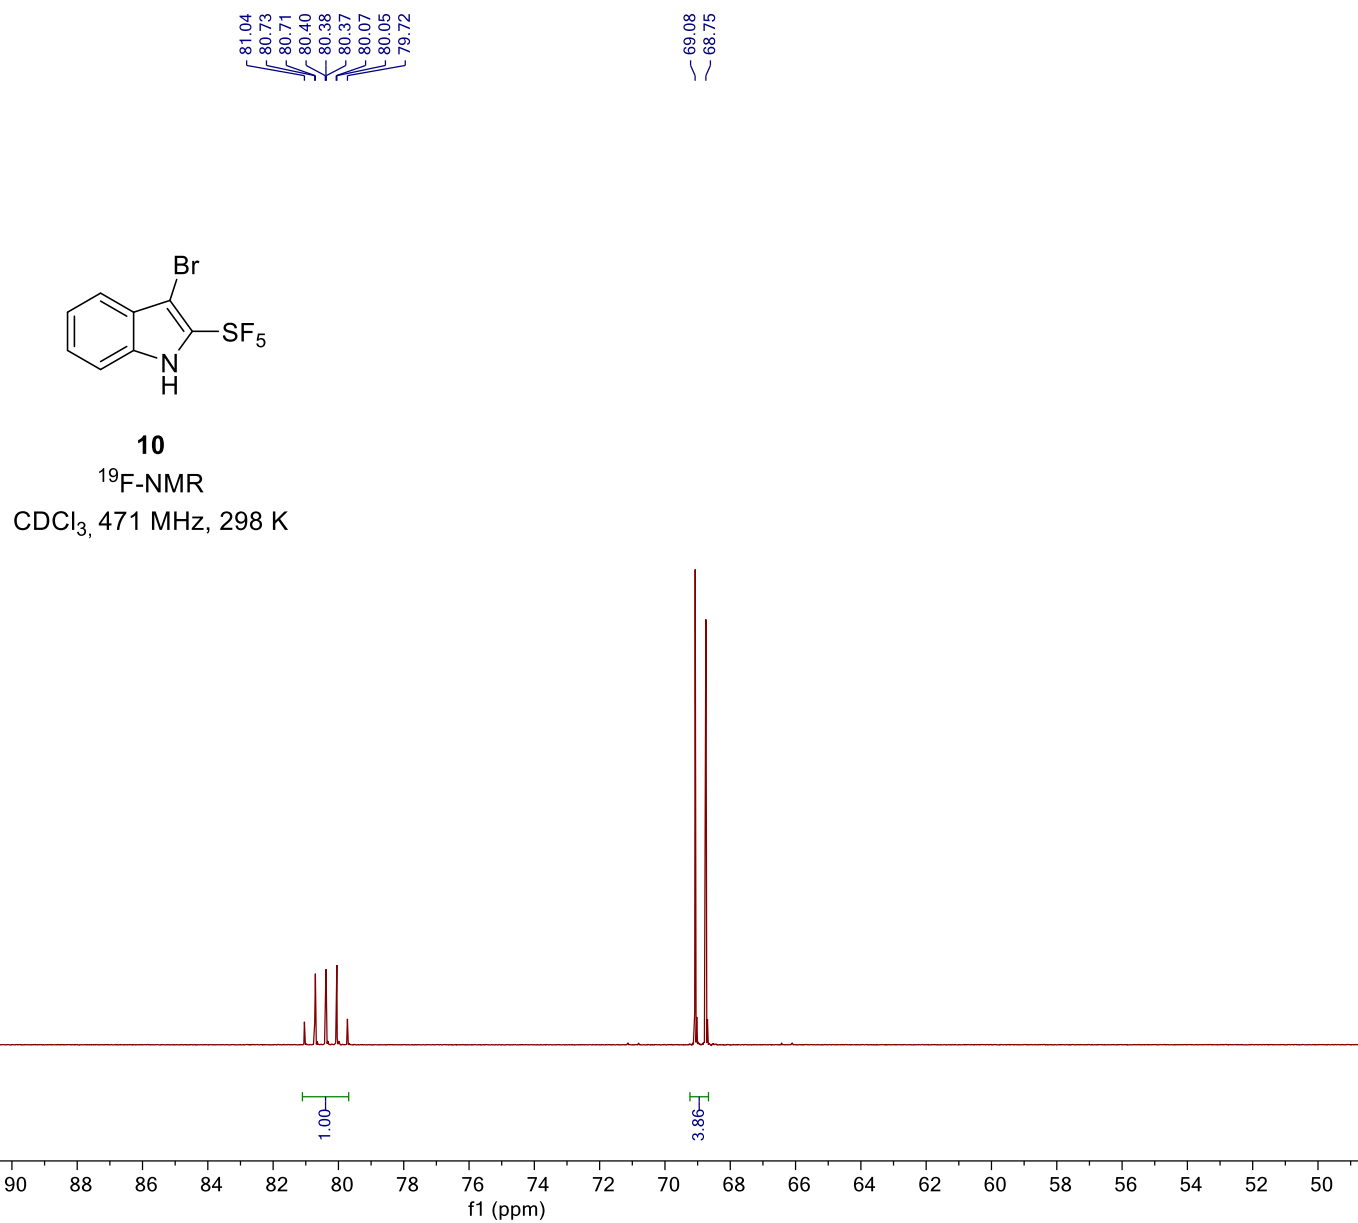







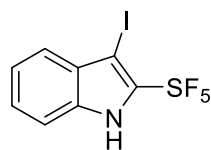**11**<sup>19</sup>F-NMRCDCl<sub>3</sub>, 471 MHz, 298 K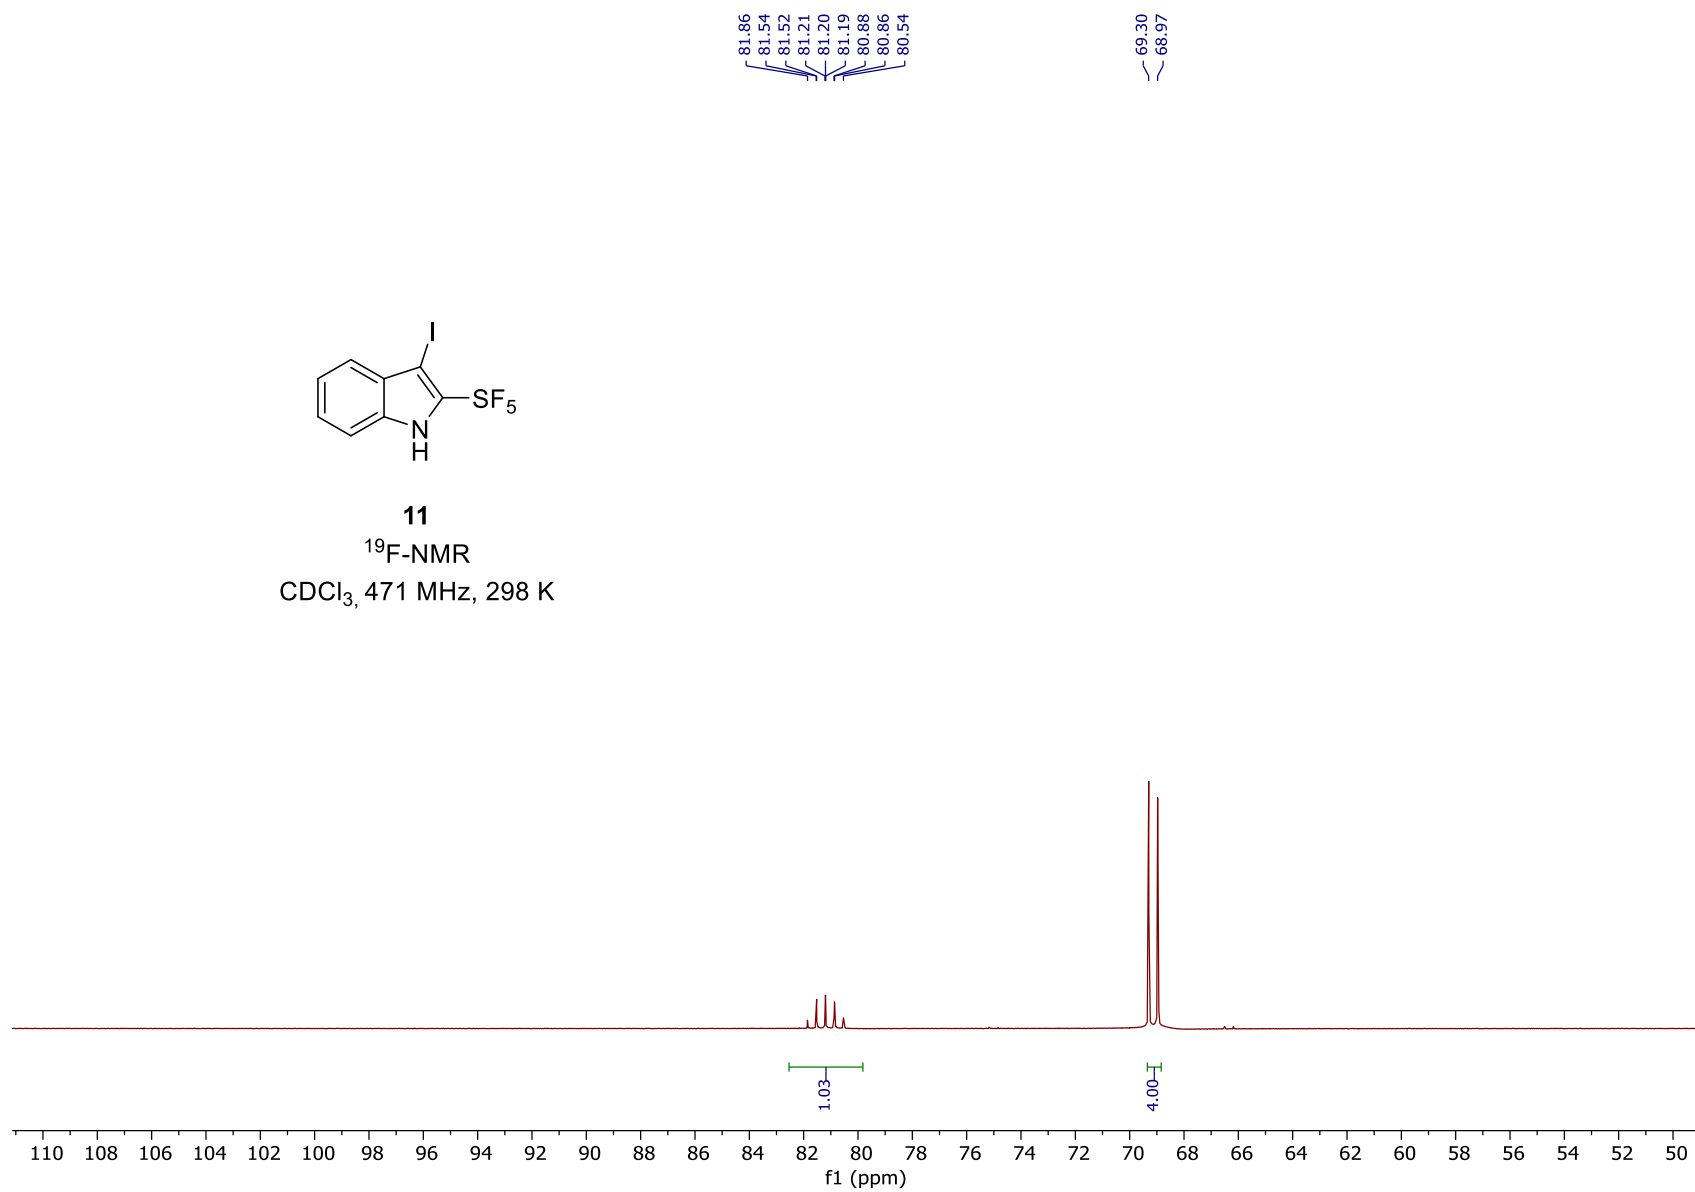

7.77  
7.76  
7.75  
7.75  
7.38  
7.37  
7.36  
7.36  
7.34  
7.34  
7.28  
7.28  
7.27  
7.25  
7.20  
7.20  
7.18  
7.18  
6.91  
6.91  
6.90  
6.89  
6.89

— 5.74

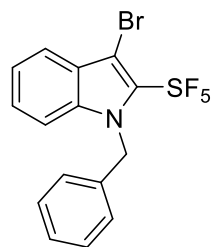

**12**

<sup>1</sup>H-NMR

CDCl<sub>3</sub>, 500 MHz, 298 K

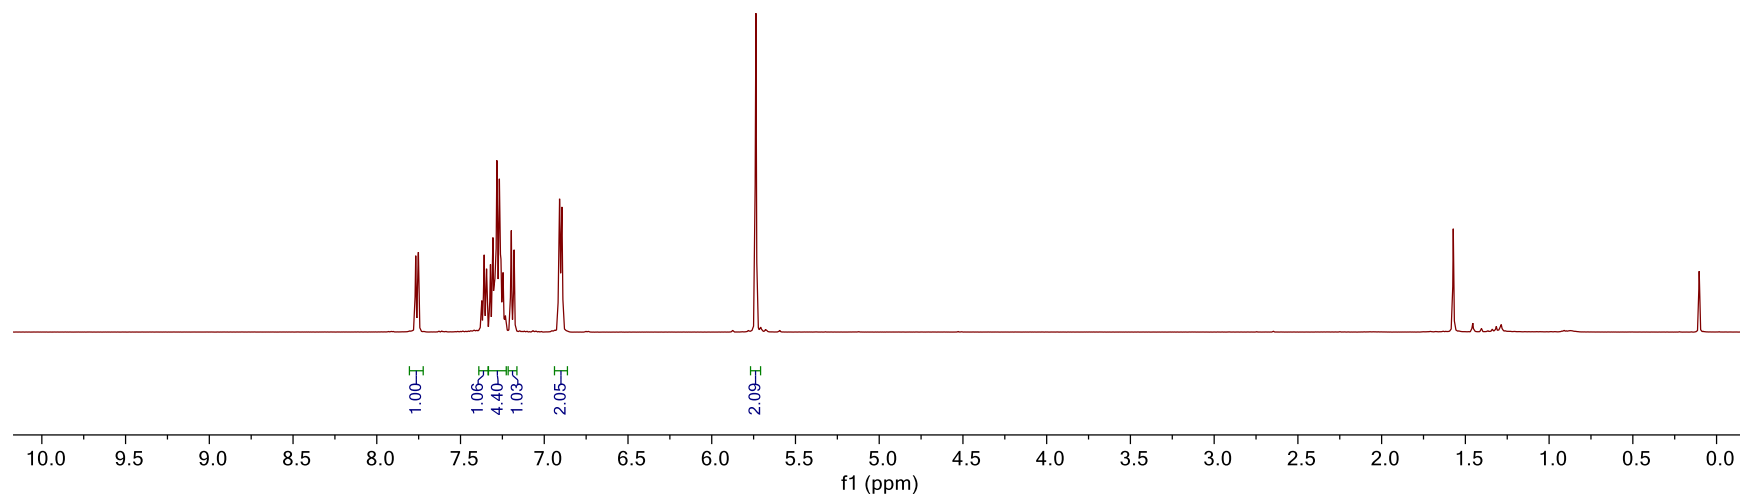

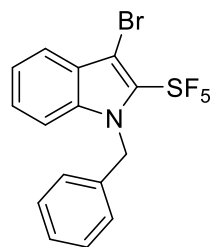**12**<sup>13</sup>C-NMRCDCl<sub>3</sub>, 125 MHz, 298 K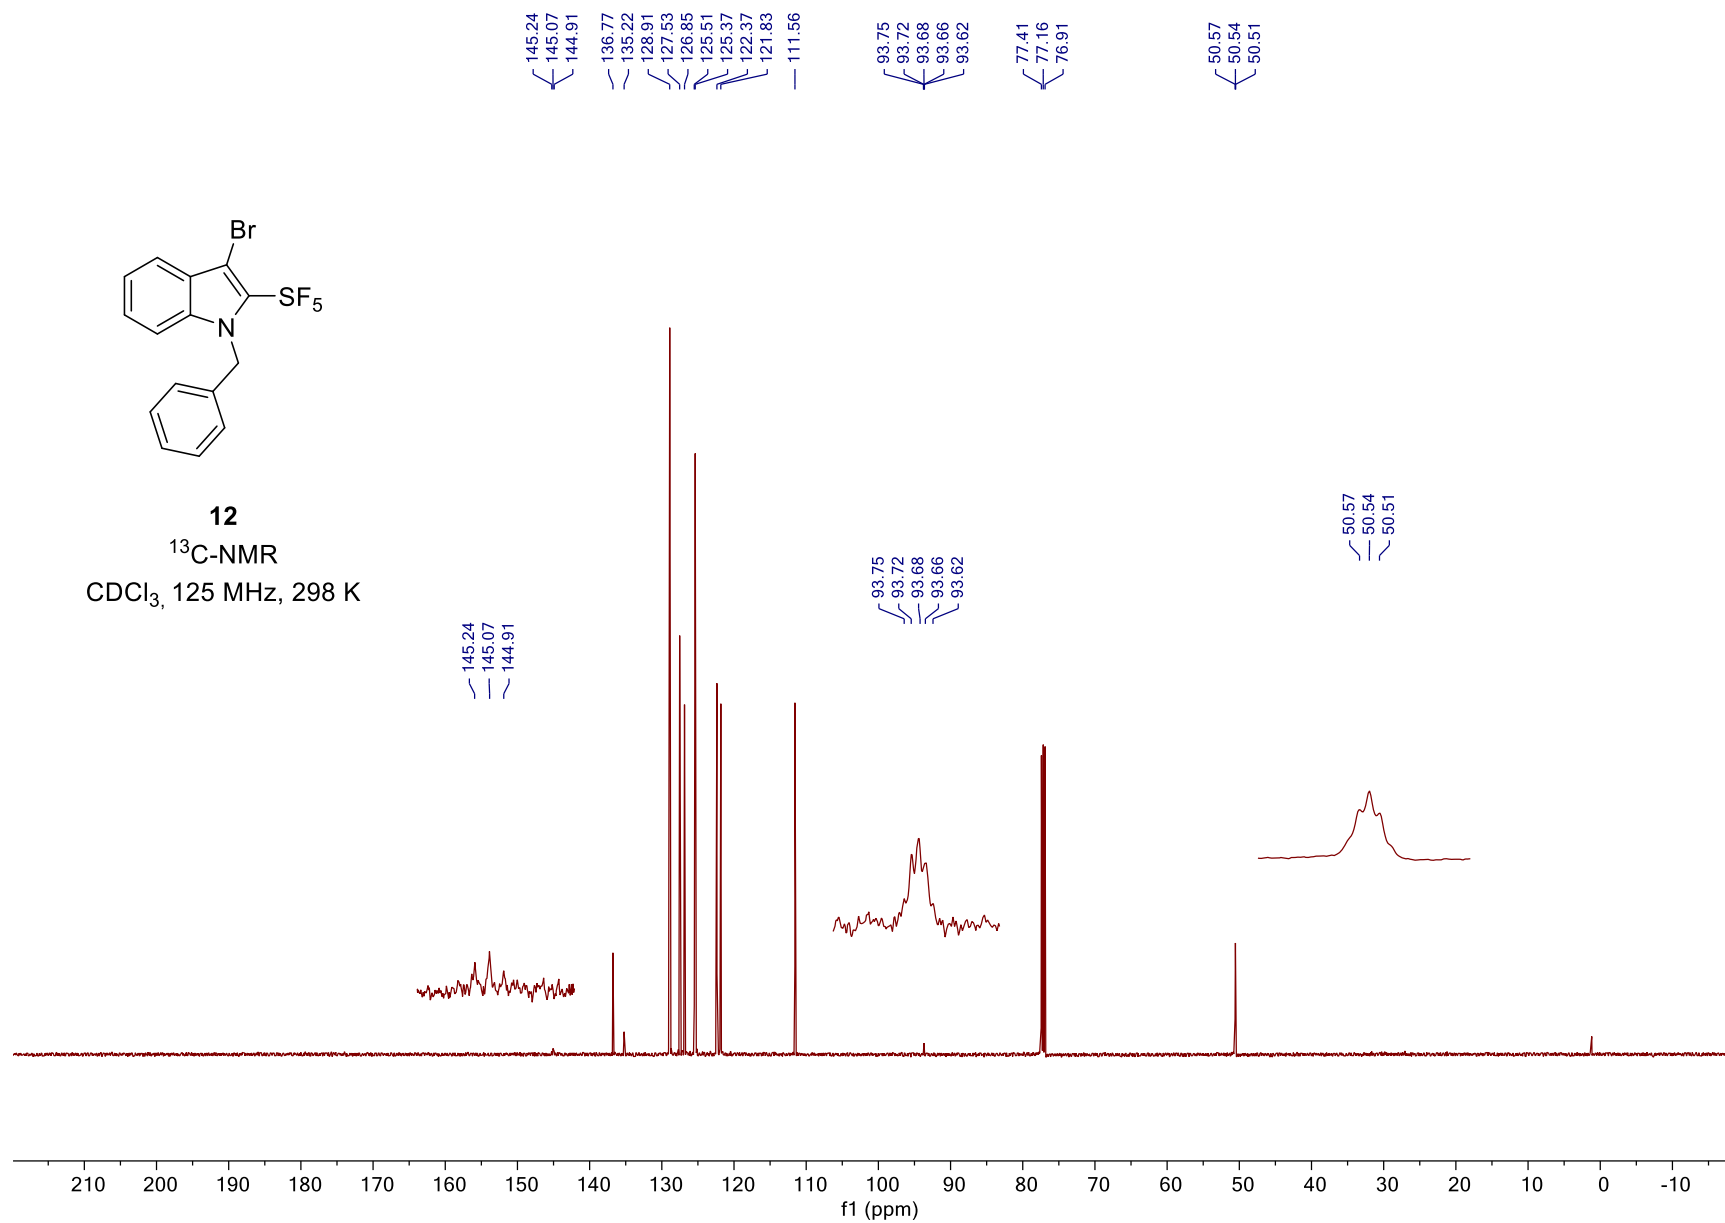

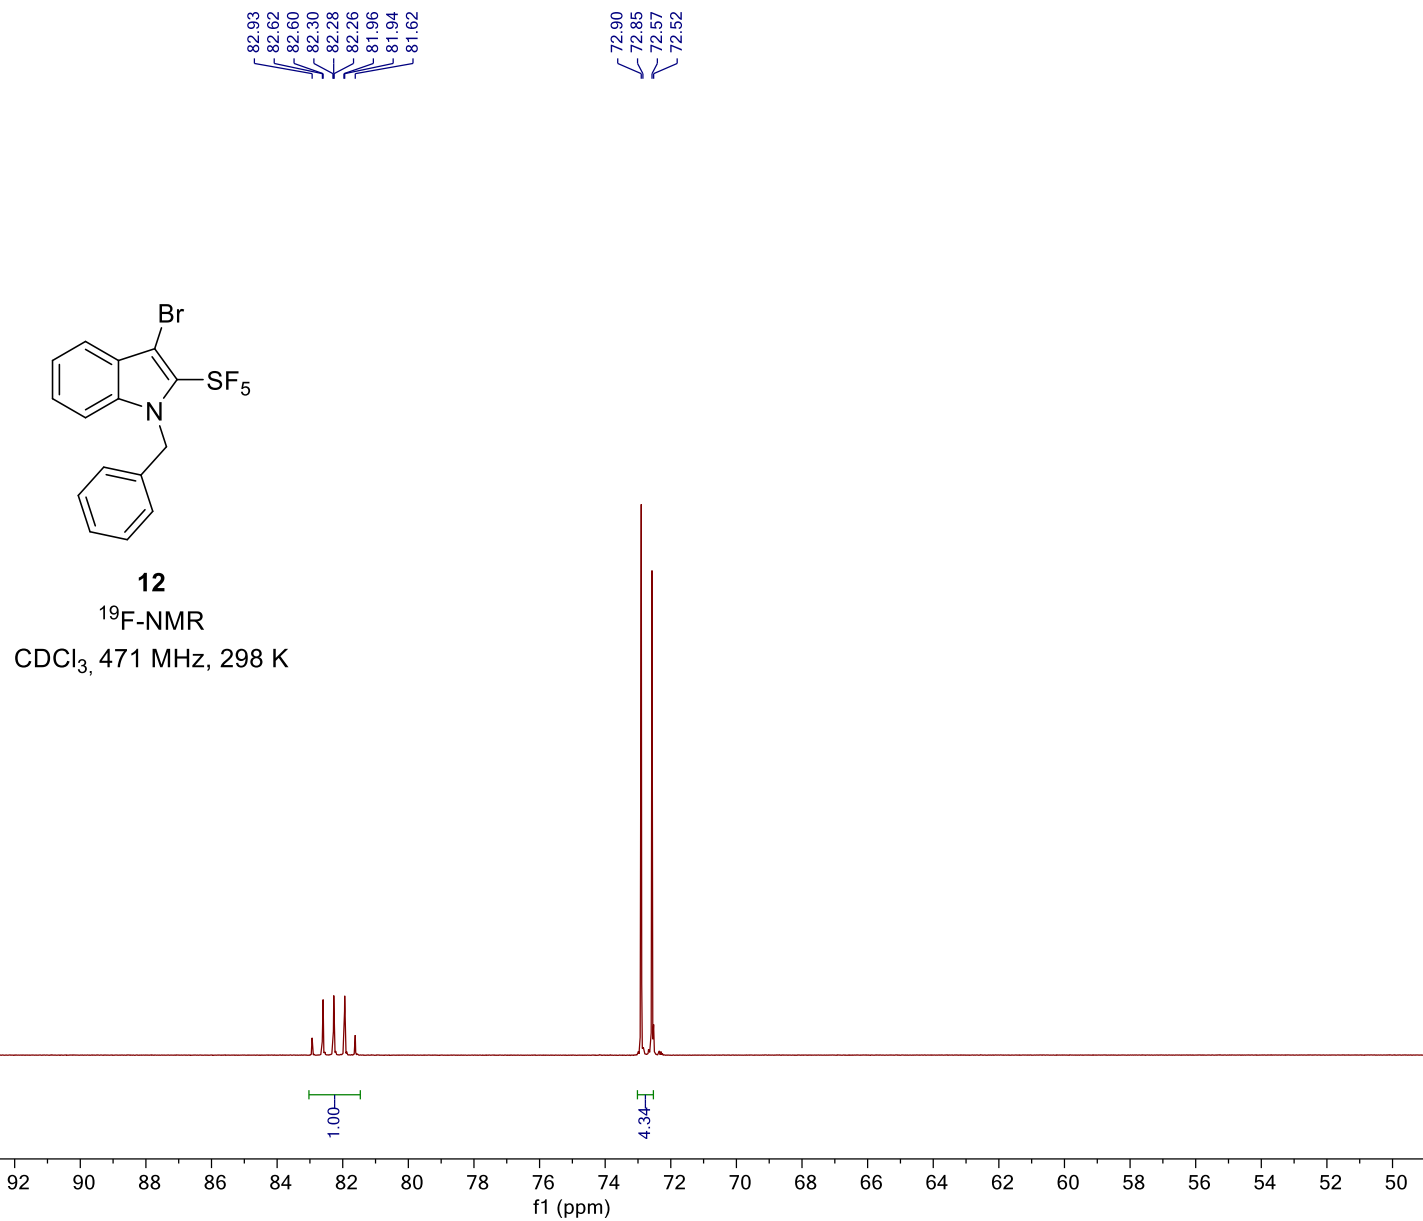

7.69  
7.68  
7.68  
7.67  
7.67  
7.37  
7.37  
7.36  
7.36  
7.35  
7.29  
7.28  
7.28  
7.27  
7.27  
7.26  
7.26  
7.25  
7.17  
7.17  
7.15  
6.91  
6.91  
6.90  
6.90

5.78

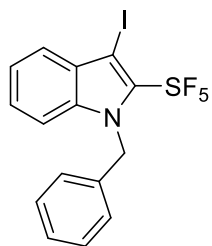

**13**

<sup>1</sup>H-NMR

CDCl<sub>3</sub>, 500 MHz, 298 K

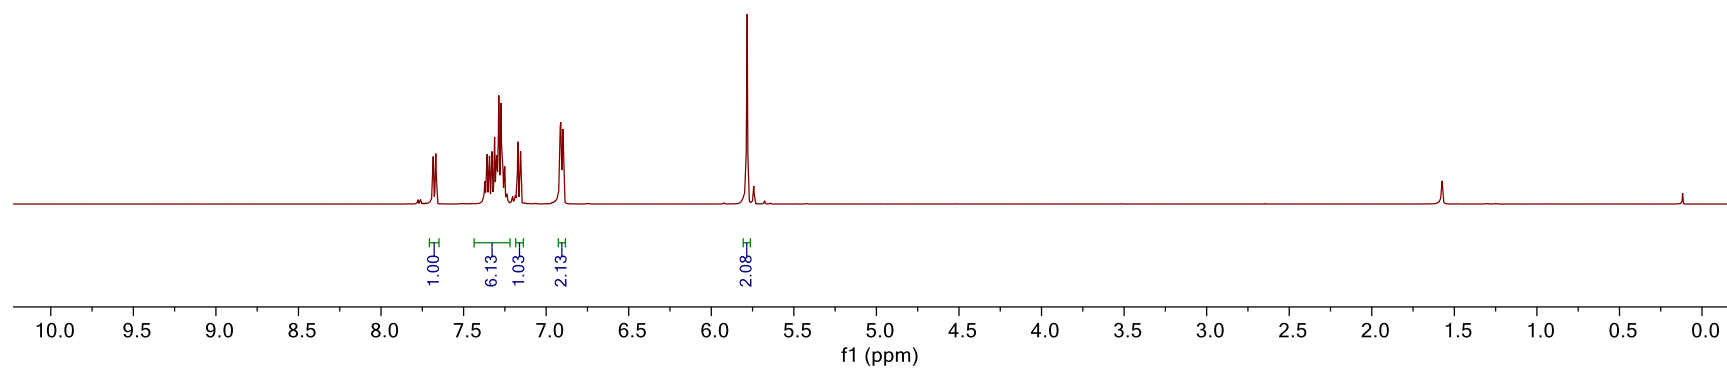

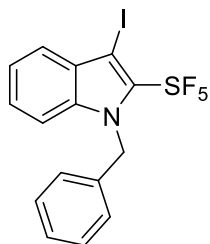

**13**  
 $^{13}\text{C-NMR}$   
 $\text{CDCl}_3$ , 125 MHz, 298 K

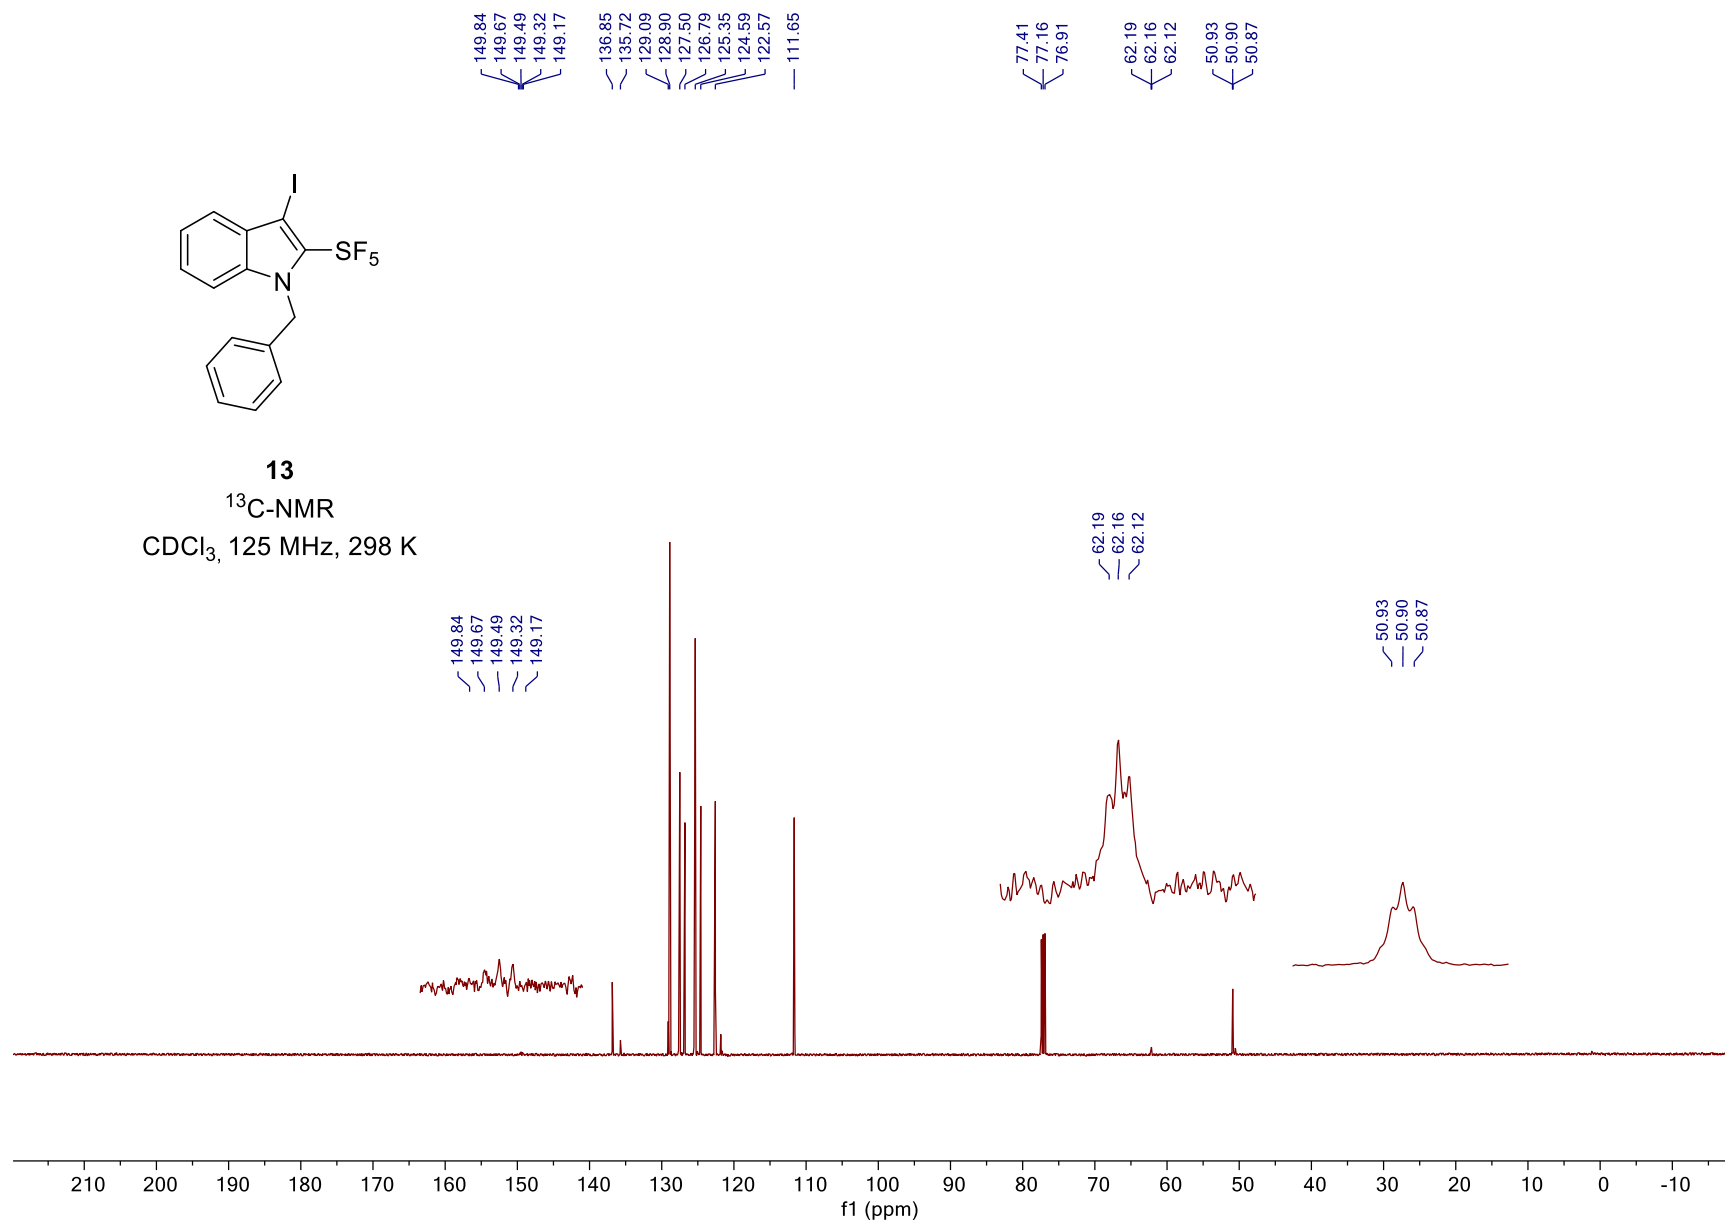



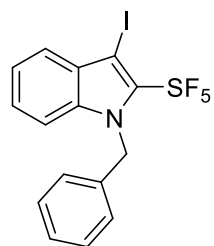**13**<sup>19</sup>F-NMRCDCl<sub>3</sub>, 471 MHz, 298 K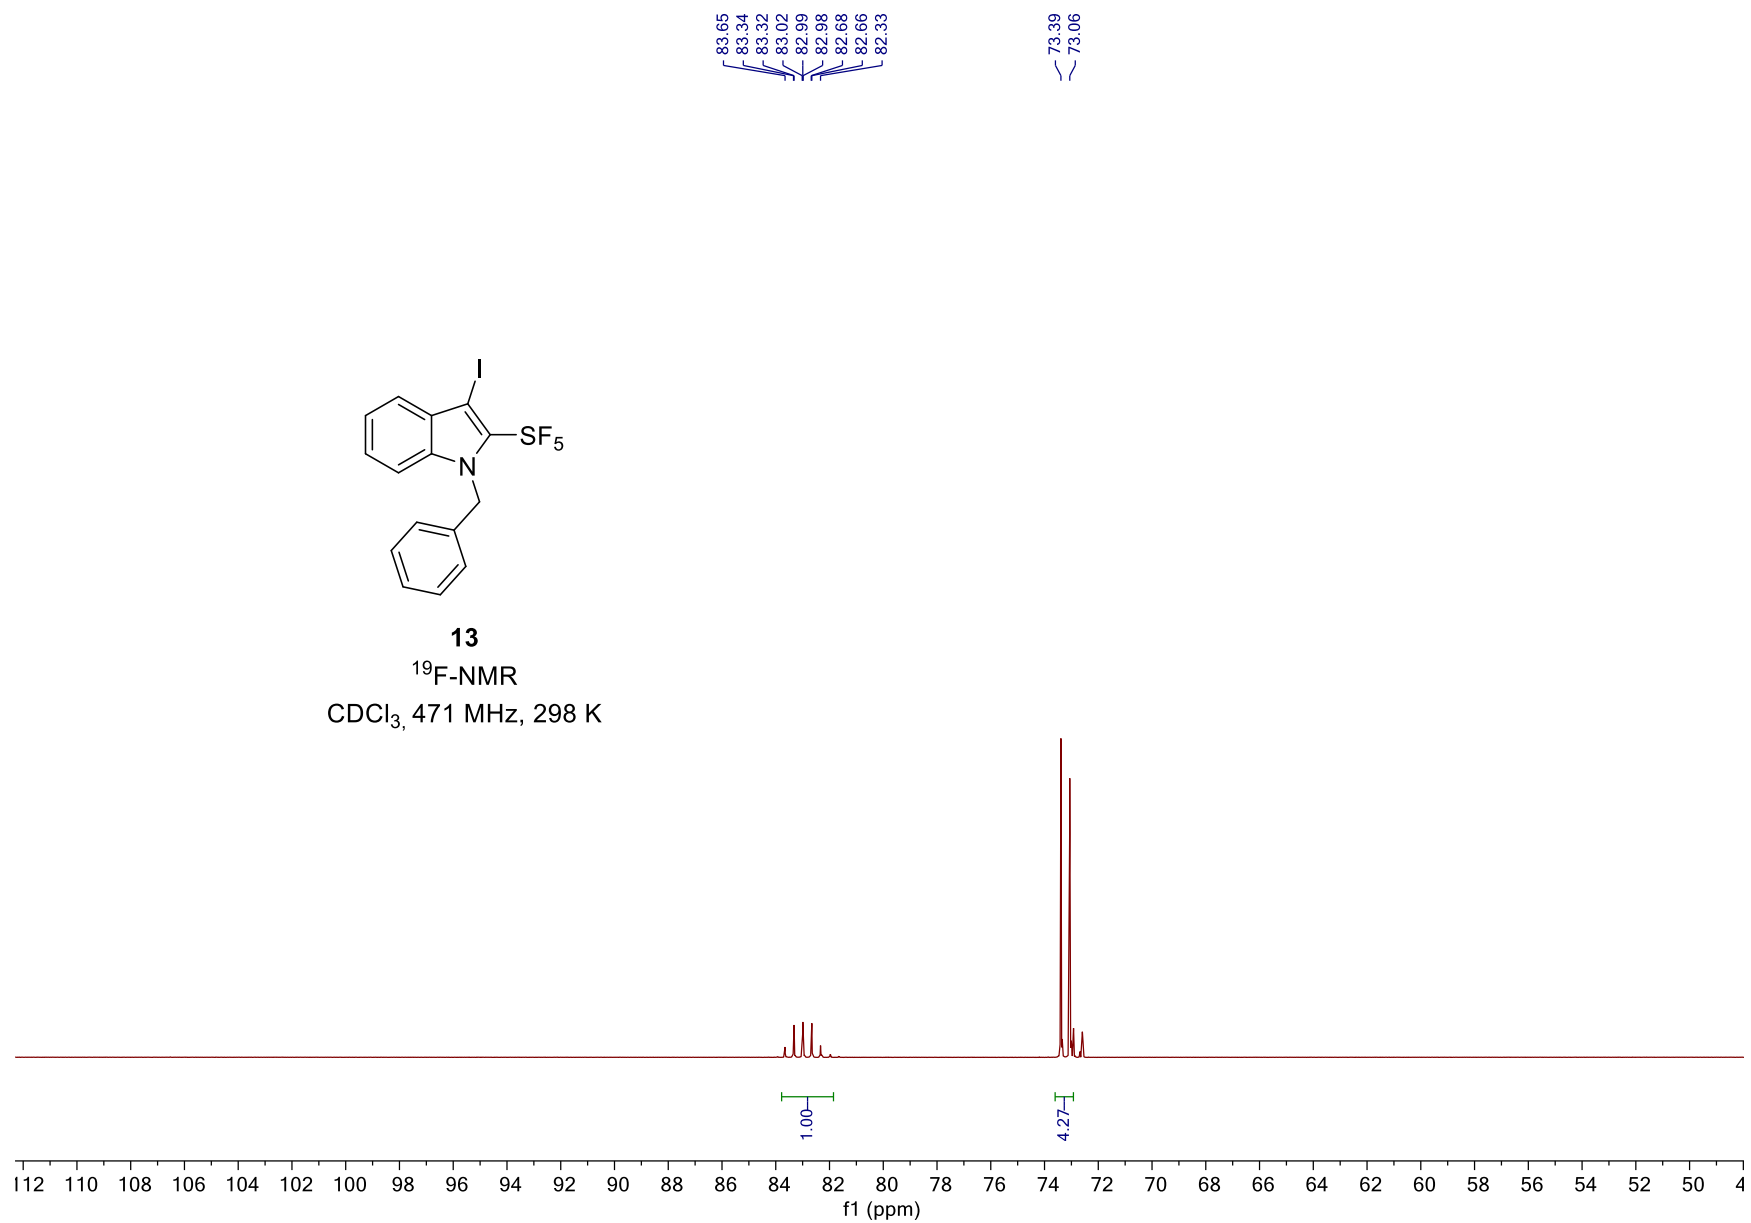

7.61  
7.60  
7.60  
7.59  
7.59  
7.46  
7.46  
7.45  
7.45  
7.44  
7.44  
7.43  
7.43  
7.36  
7.36  
7.36  
7.35  
7.35  
7.34  
7.34  
7.30  
7.30  
7.29  
7.29  
7.29  
7.27  
7.27  
7.26

4.03  
4.03  
4.02

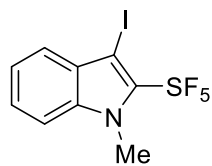

**14**

<sup>1</sup>H-NMR

CDCl<sub>3</sub>, 500 MHz, 298 K

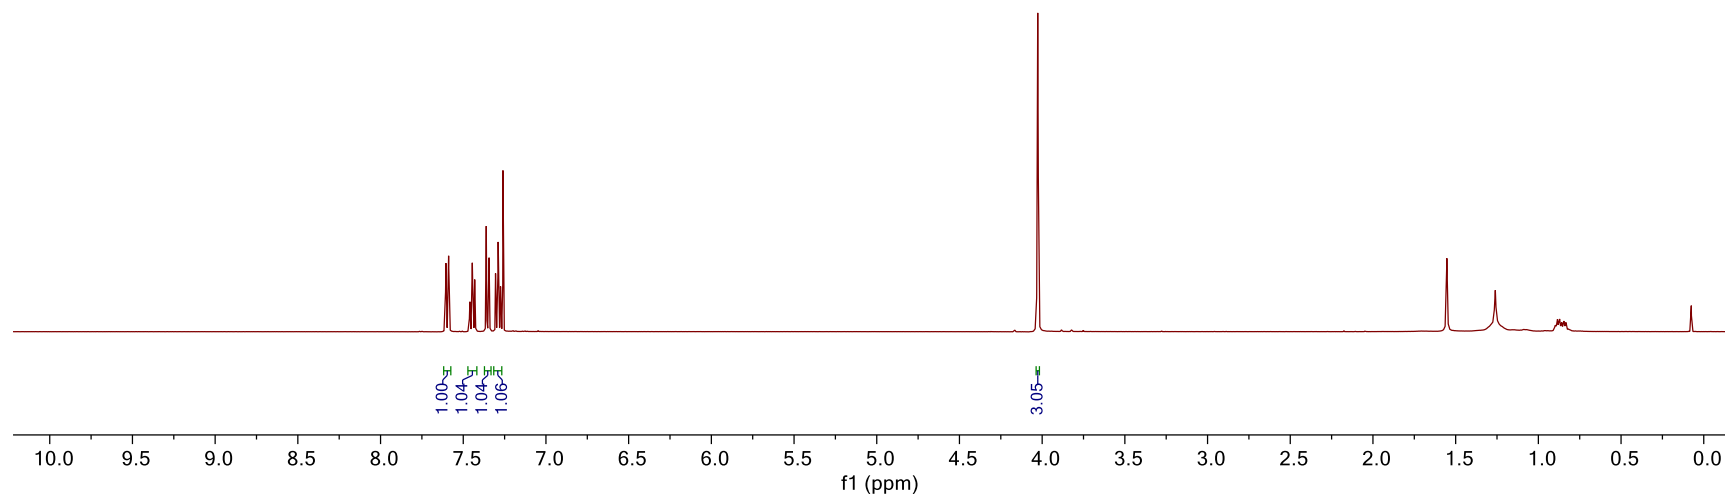

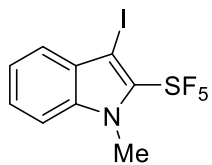**14**<sup>13</sup>C-NMRCDCl<sub>3</sub>, 125 MHz, 298 K149.54  
149.38  
149.22  
149.06

— 135.92

128.93

126.44

124.52

122.28

— 110.59

77.41  
77.16  
76.9161.16  
61.13  
61.09  
61.05  
61.0234.54  
34.50  
34.46  
34.42  
34.39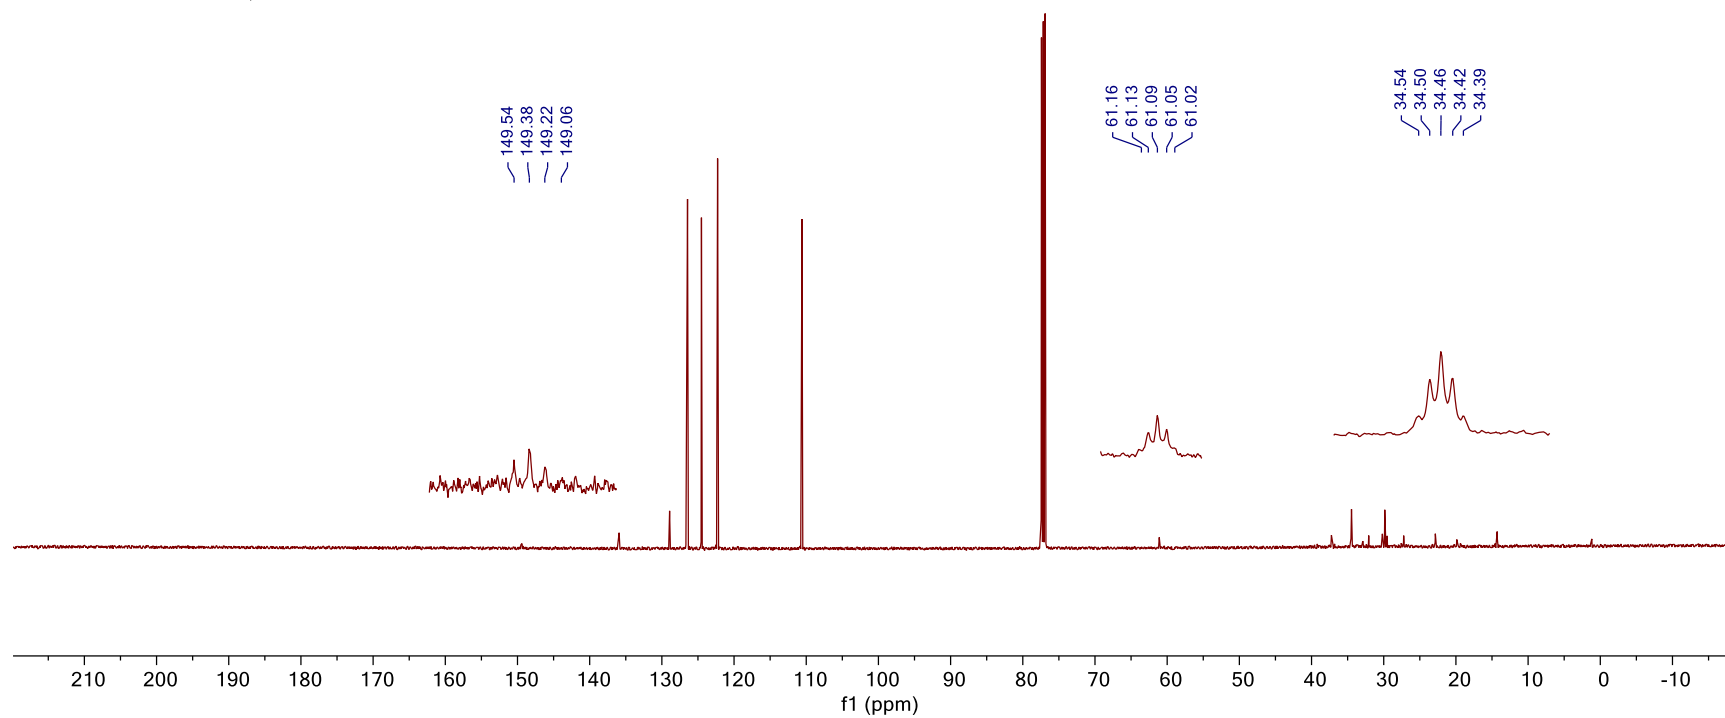

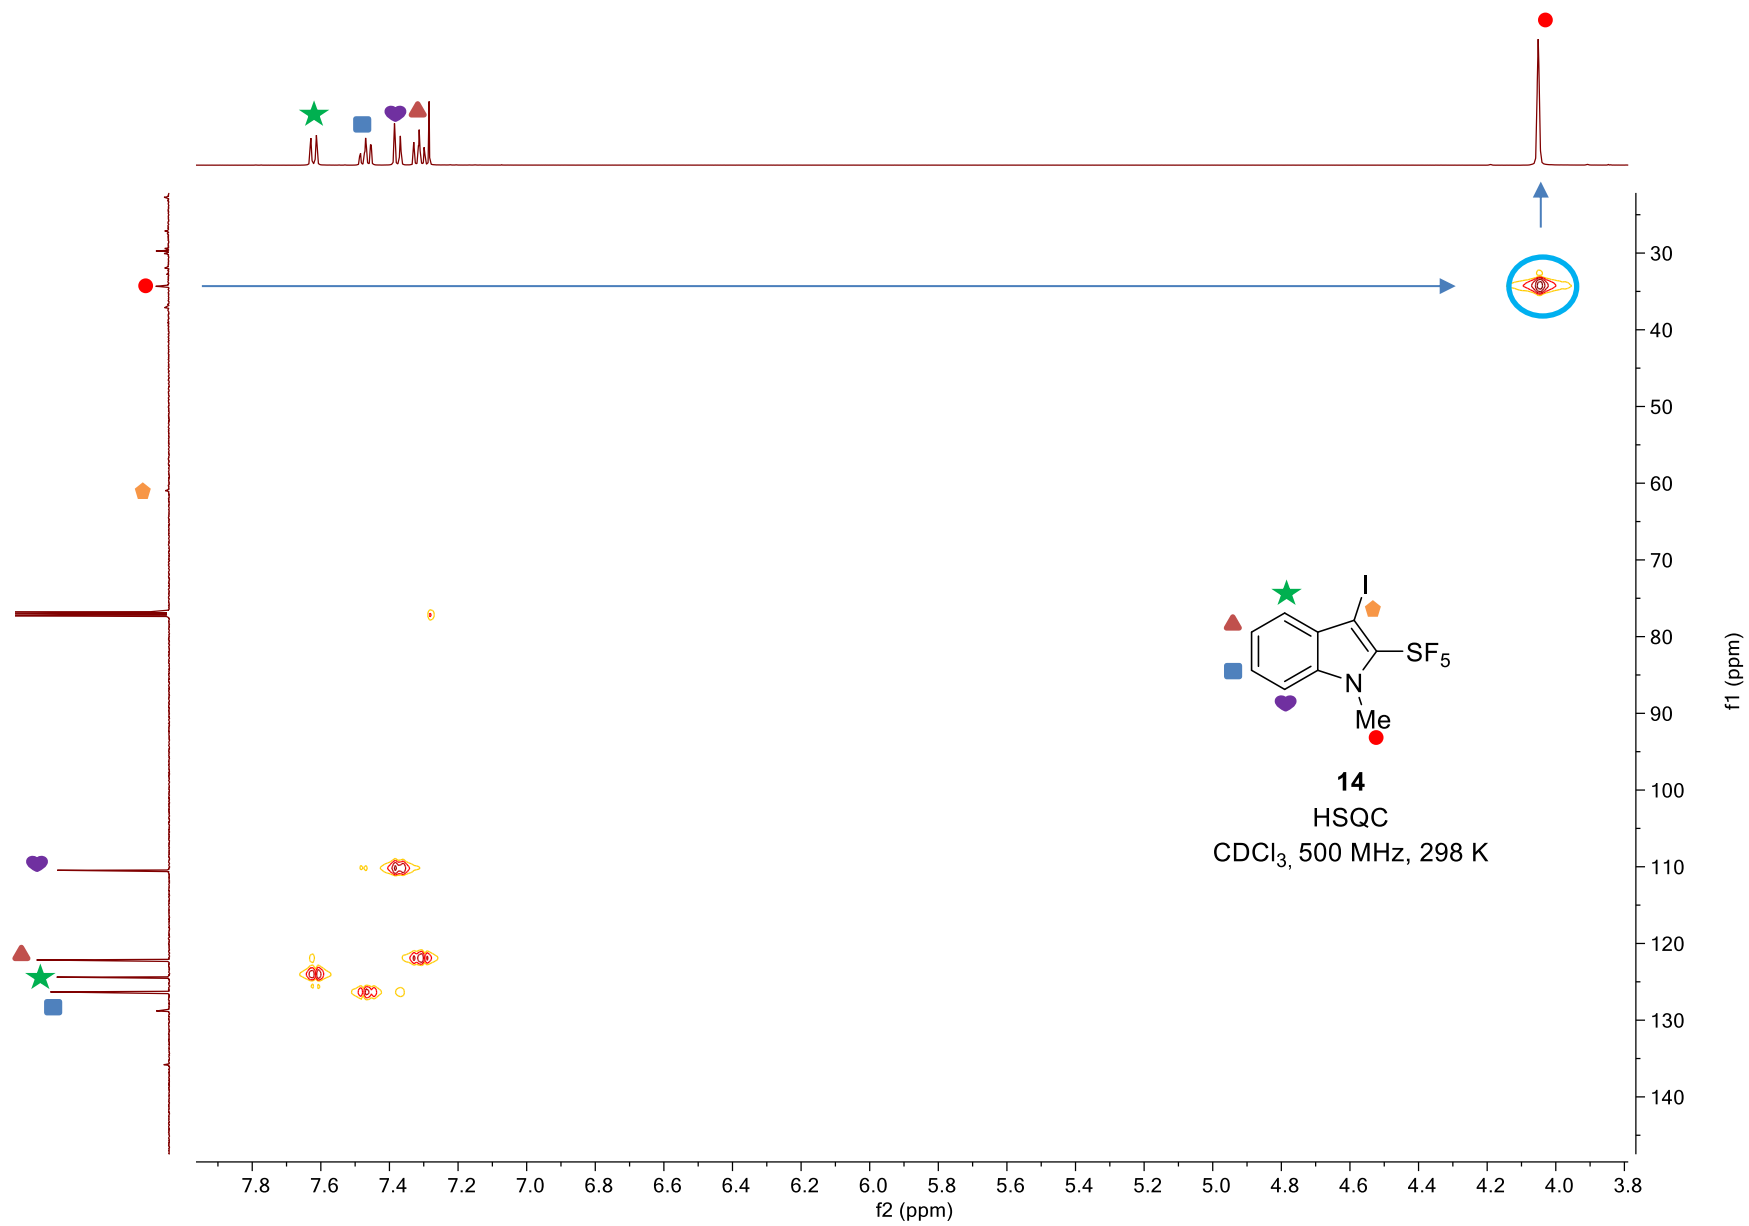

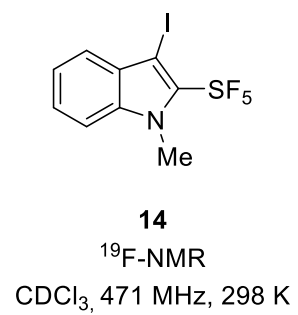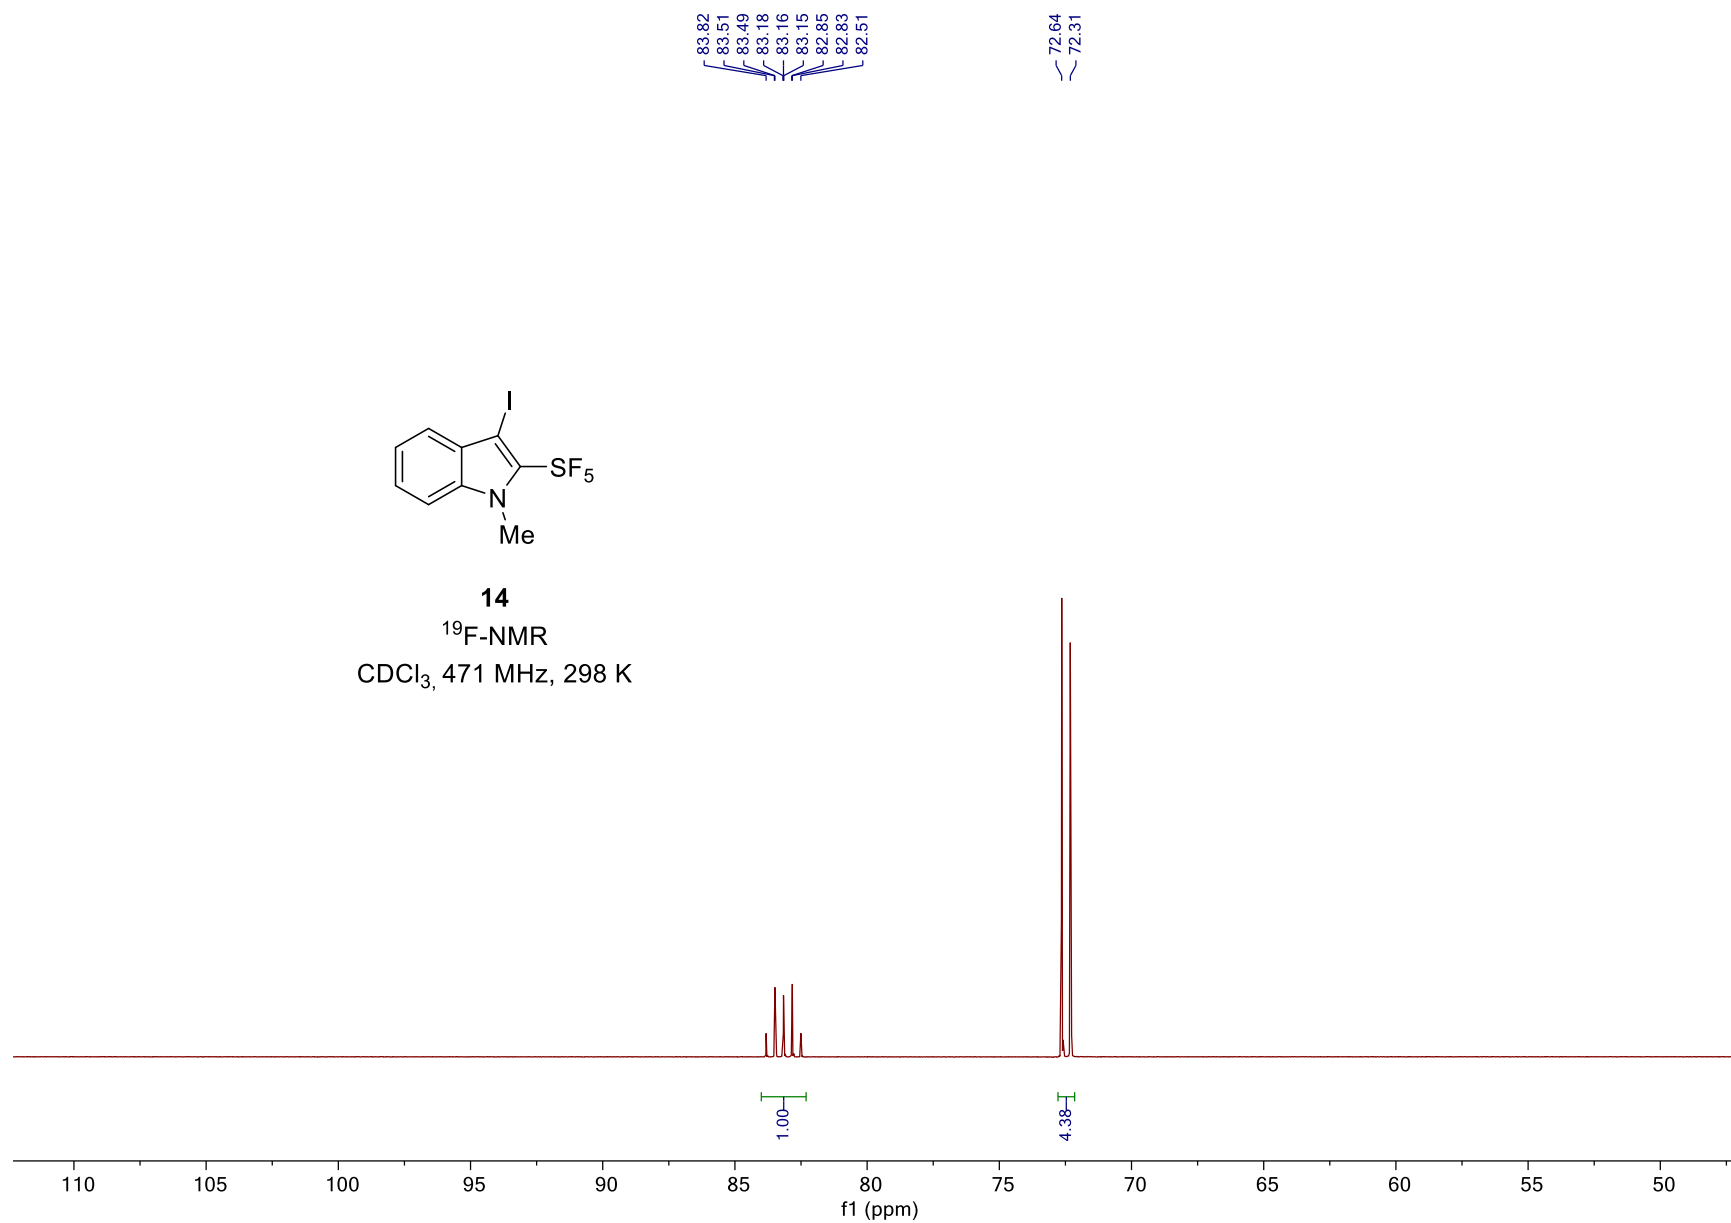

7.67  
7.66  
7.41  
7.40  
7.38  
7.36  
7.35  
7.26  
7.21  
7.19  
7.18  
5.98  
5.96  
5.96  
5.95  
5.94  
5.93  
5.92  
5.92  
5.91  
5.90  
5.11  
5.10  
5.07  
5.07  
5.04  
5.04  
5.02  
5.02

3.93  
3.78  
3.77

1.56

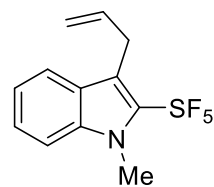

**15**

<sup>1</sup>H-NMR

CDCl<sub>3</sub>, 500 MHz, 298 K

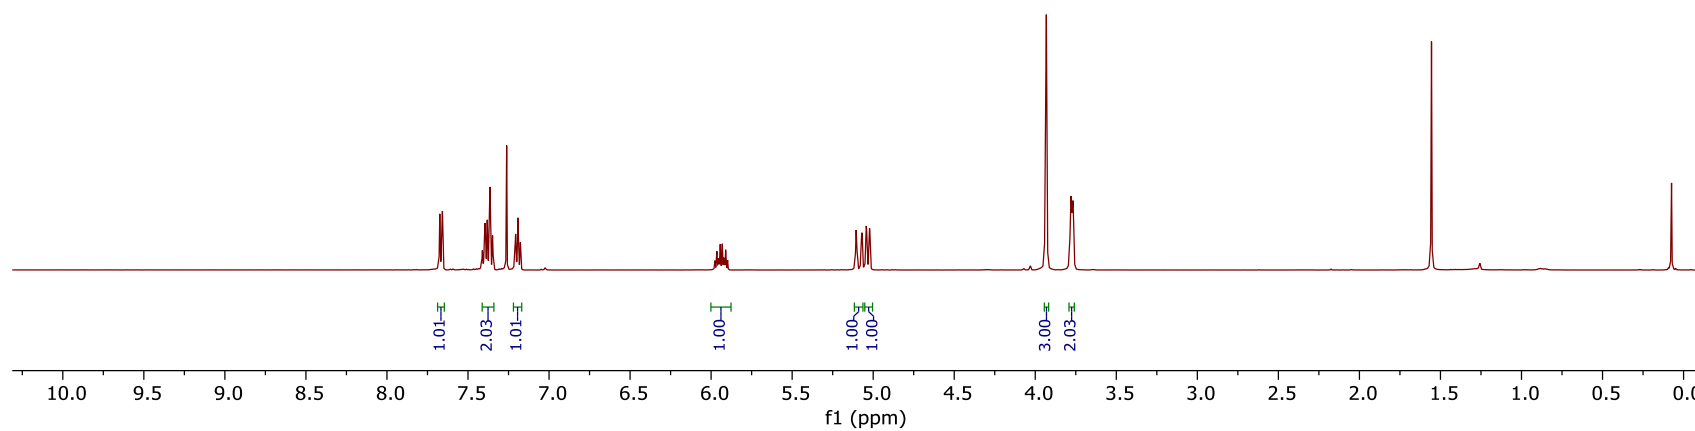

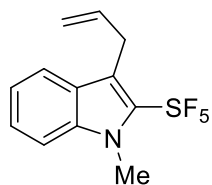**15**

$^{13}\text{C-NMR}$   
 $\text{CDCl}_3$ , 125 MHz, 298 K

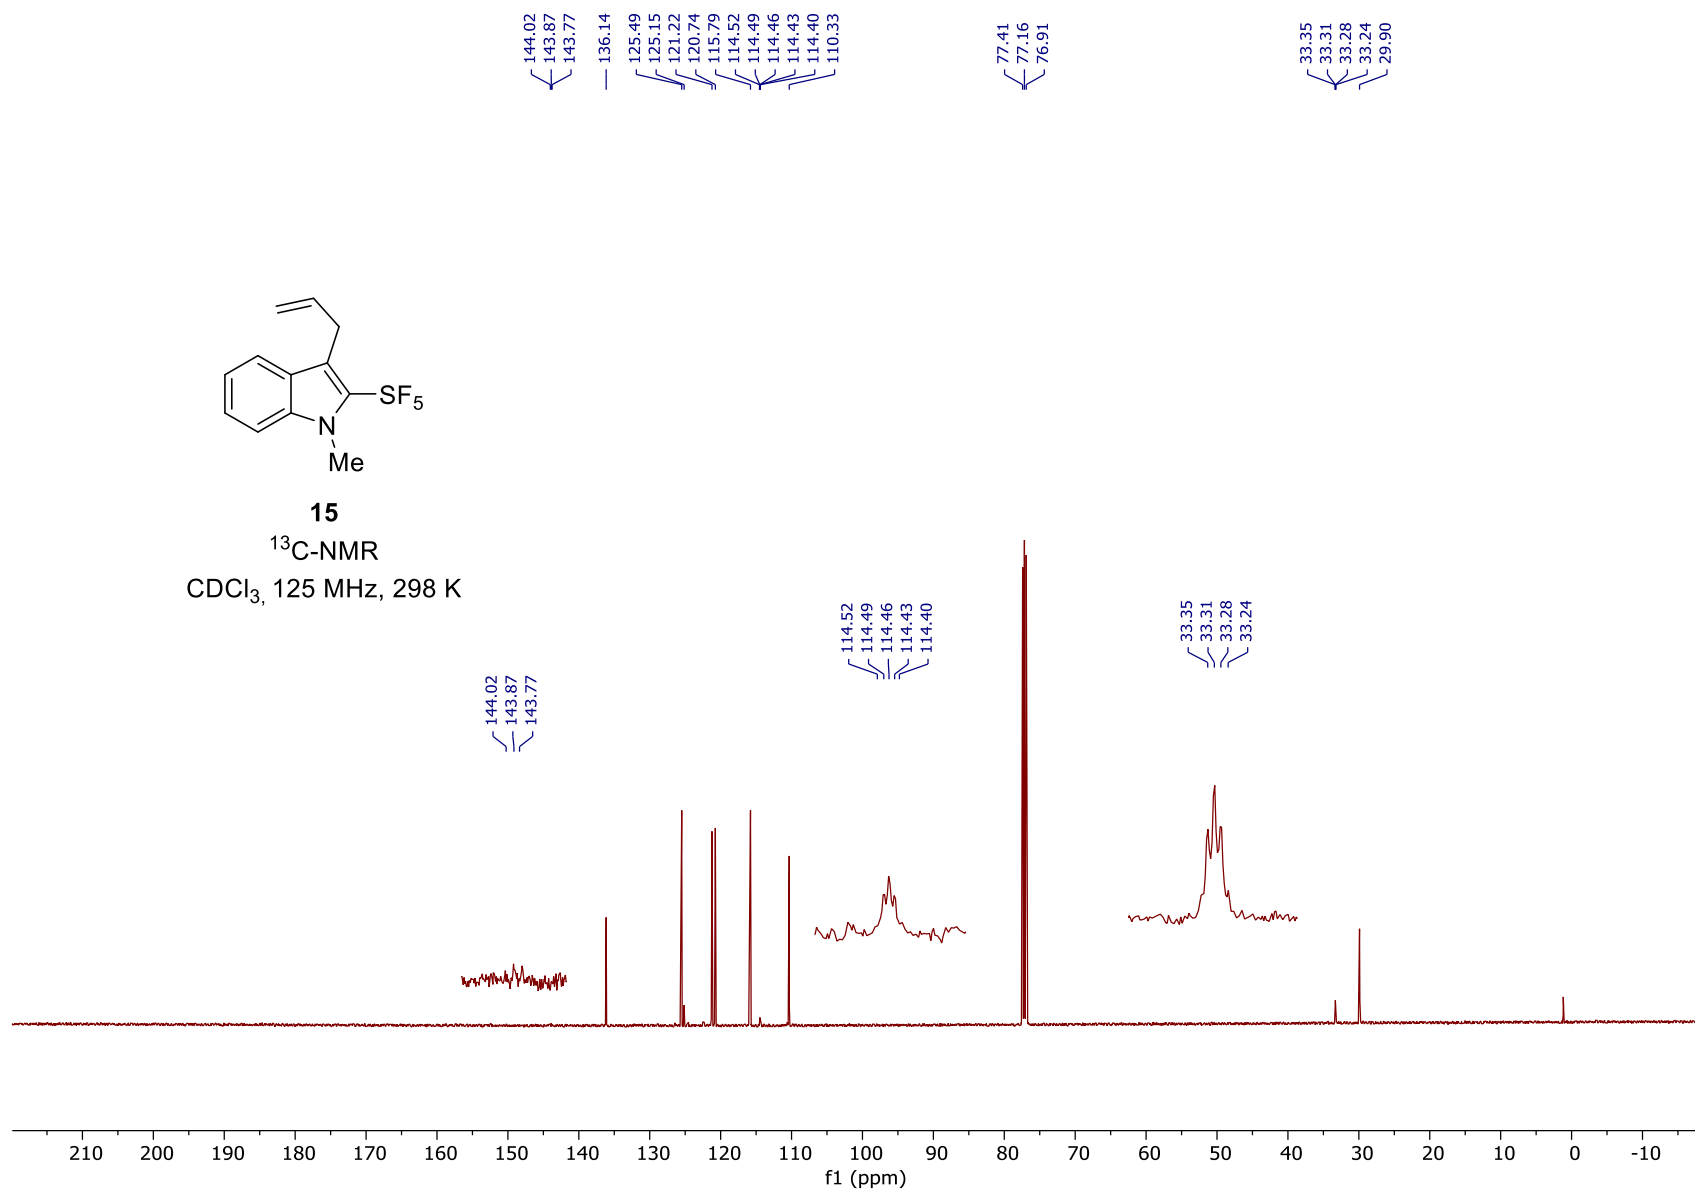

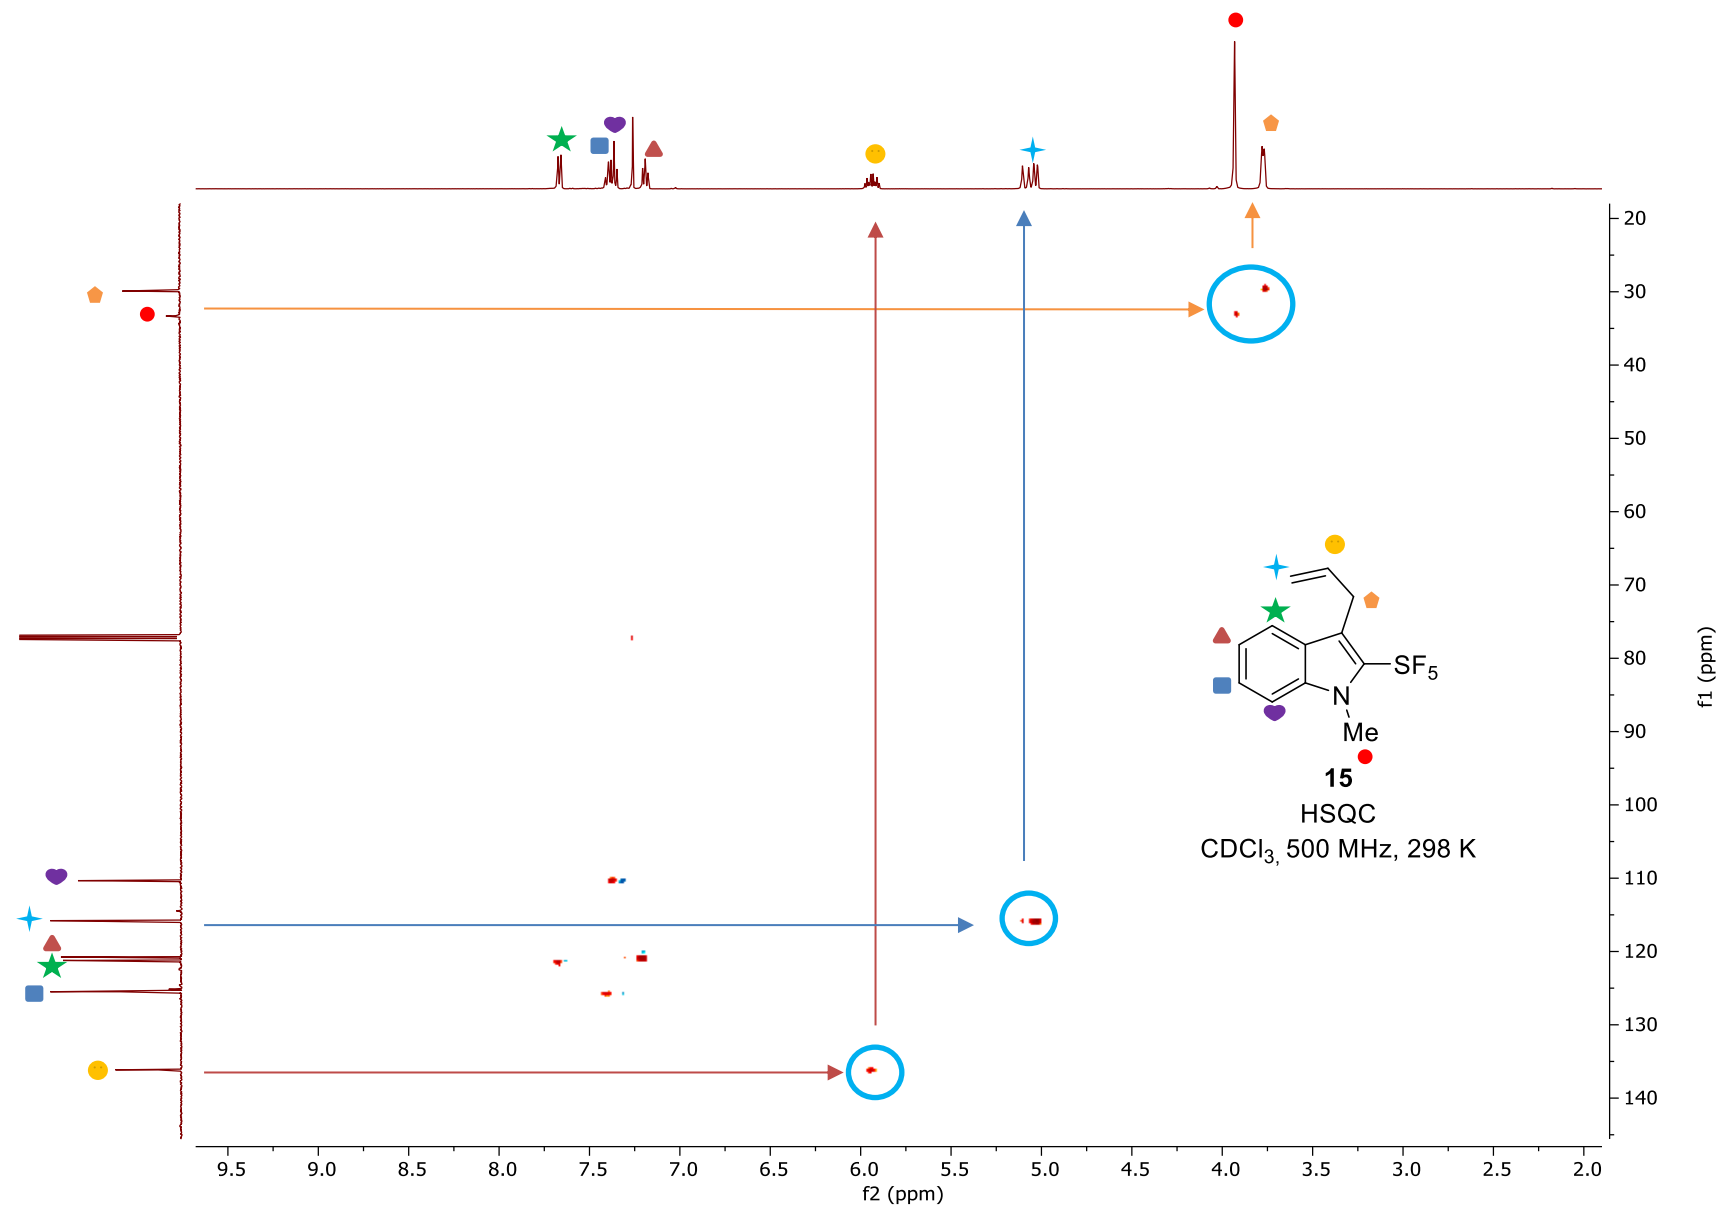



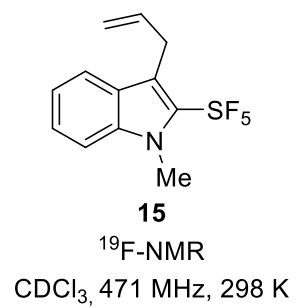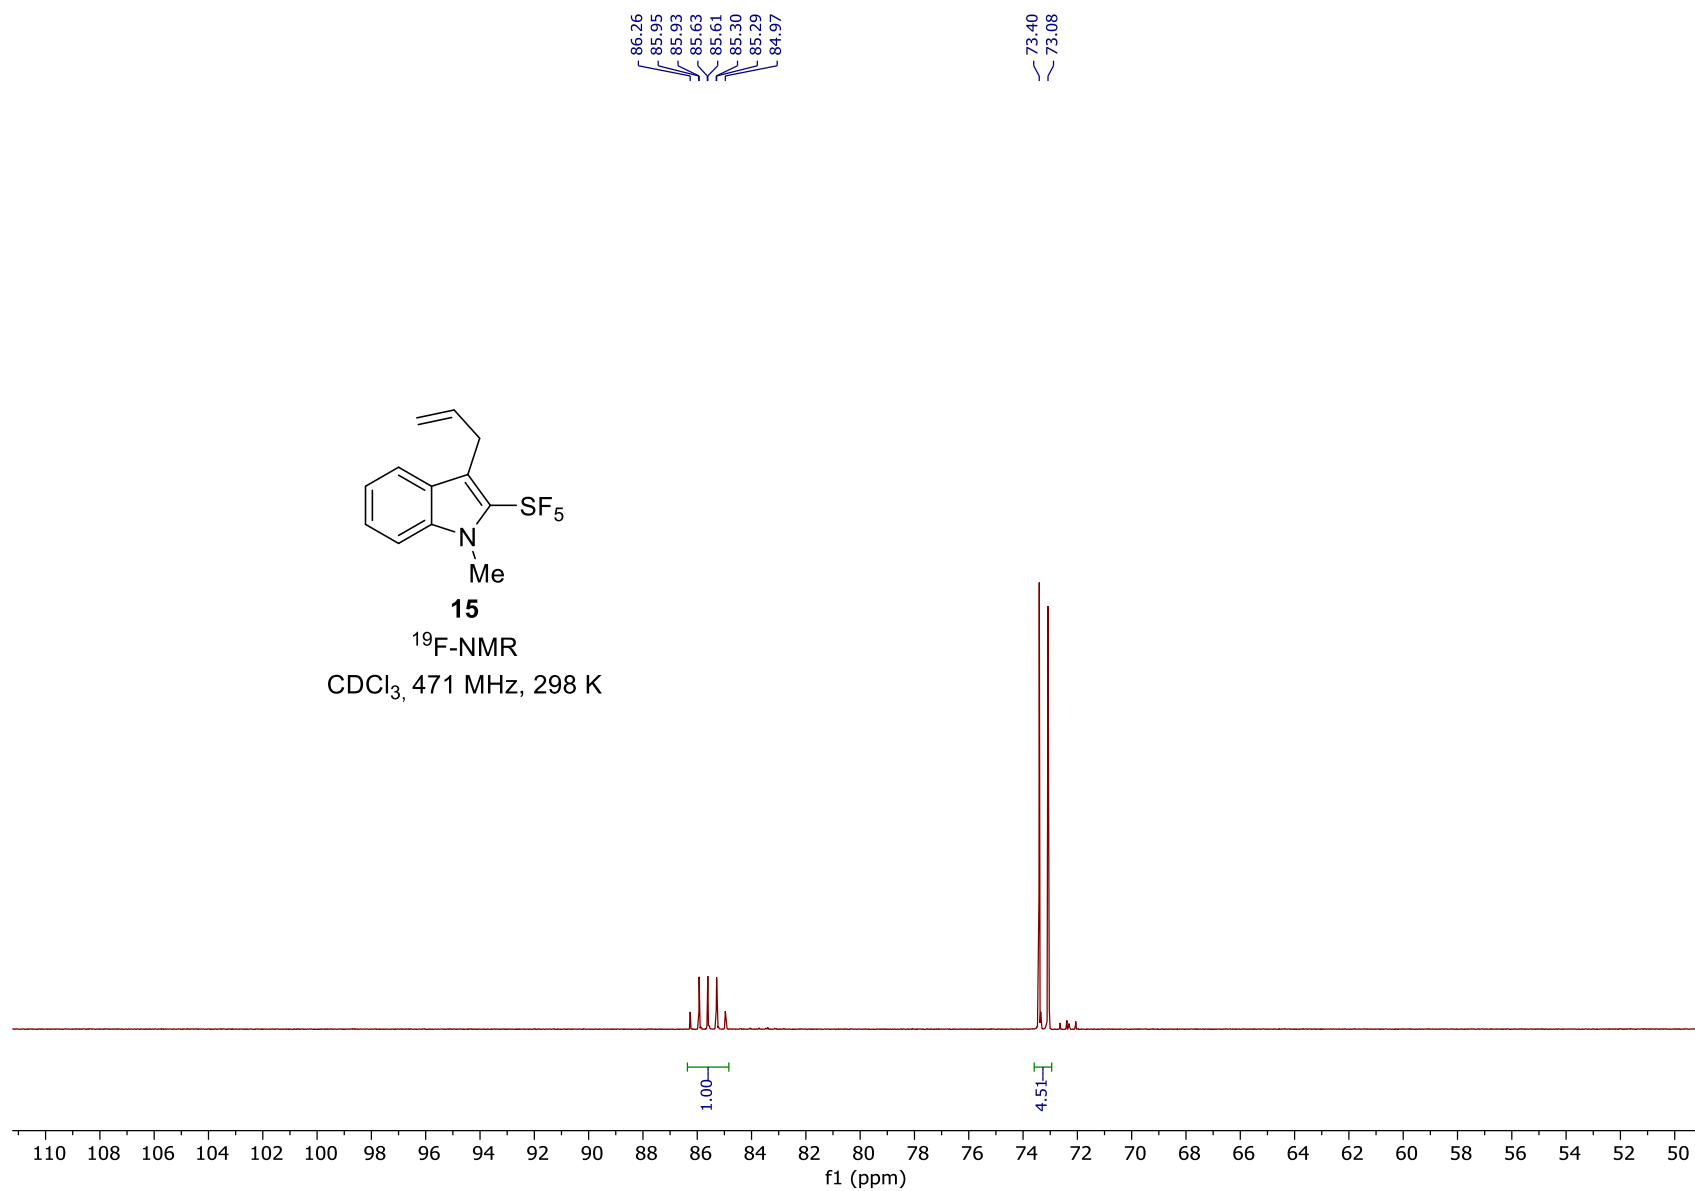

7.84  
7.83  
7.55  
7.53  
7.52  
7.49  
7.48  
7.43  
7.42  
7.40  
7.26

4.05

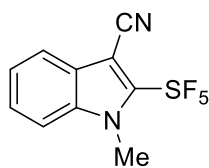

**16**

<sup>1</sup>H-NMR

CDCl<sub>3</sub>, 500 MHz, 298 K

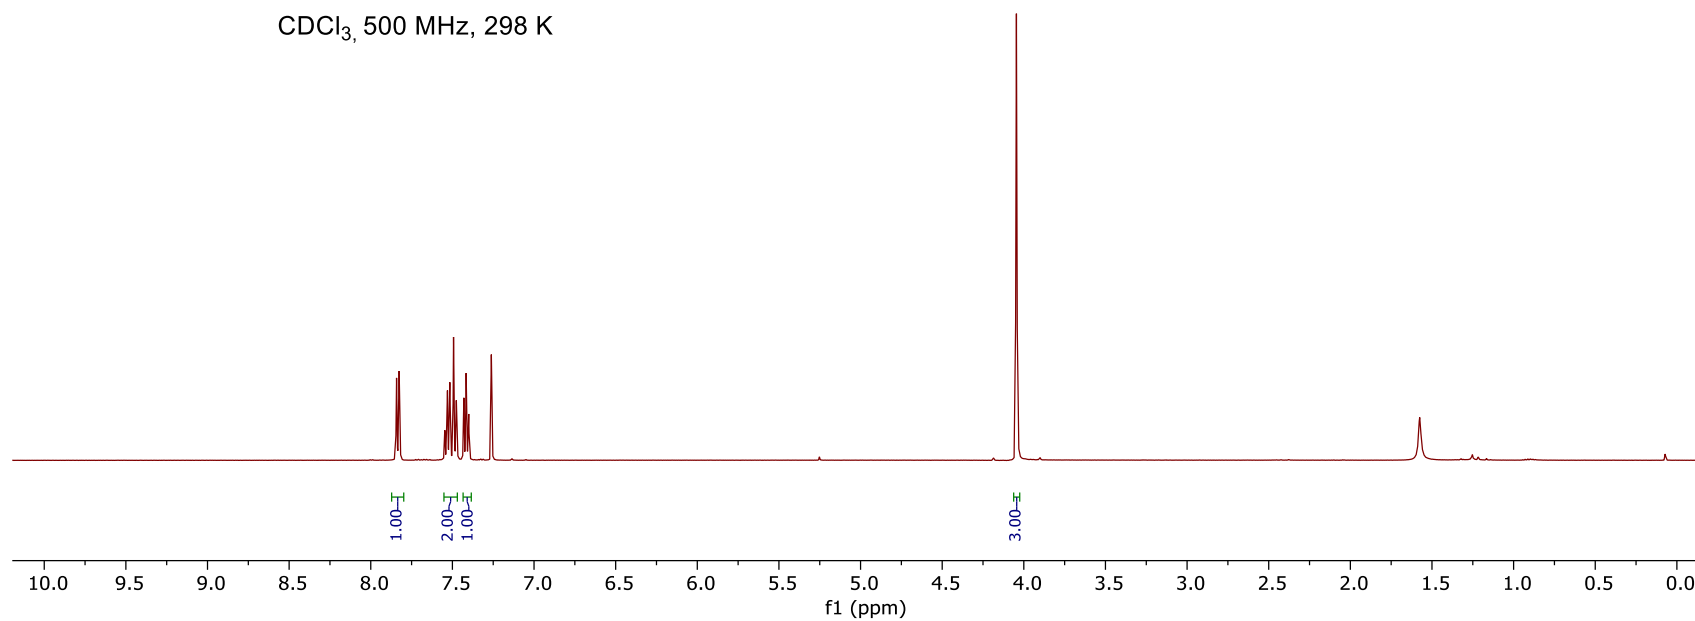

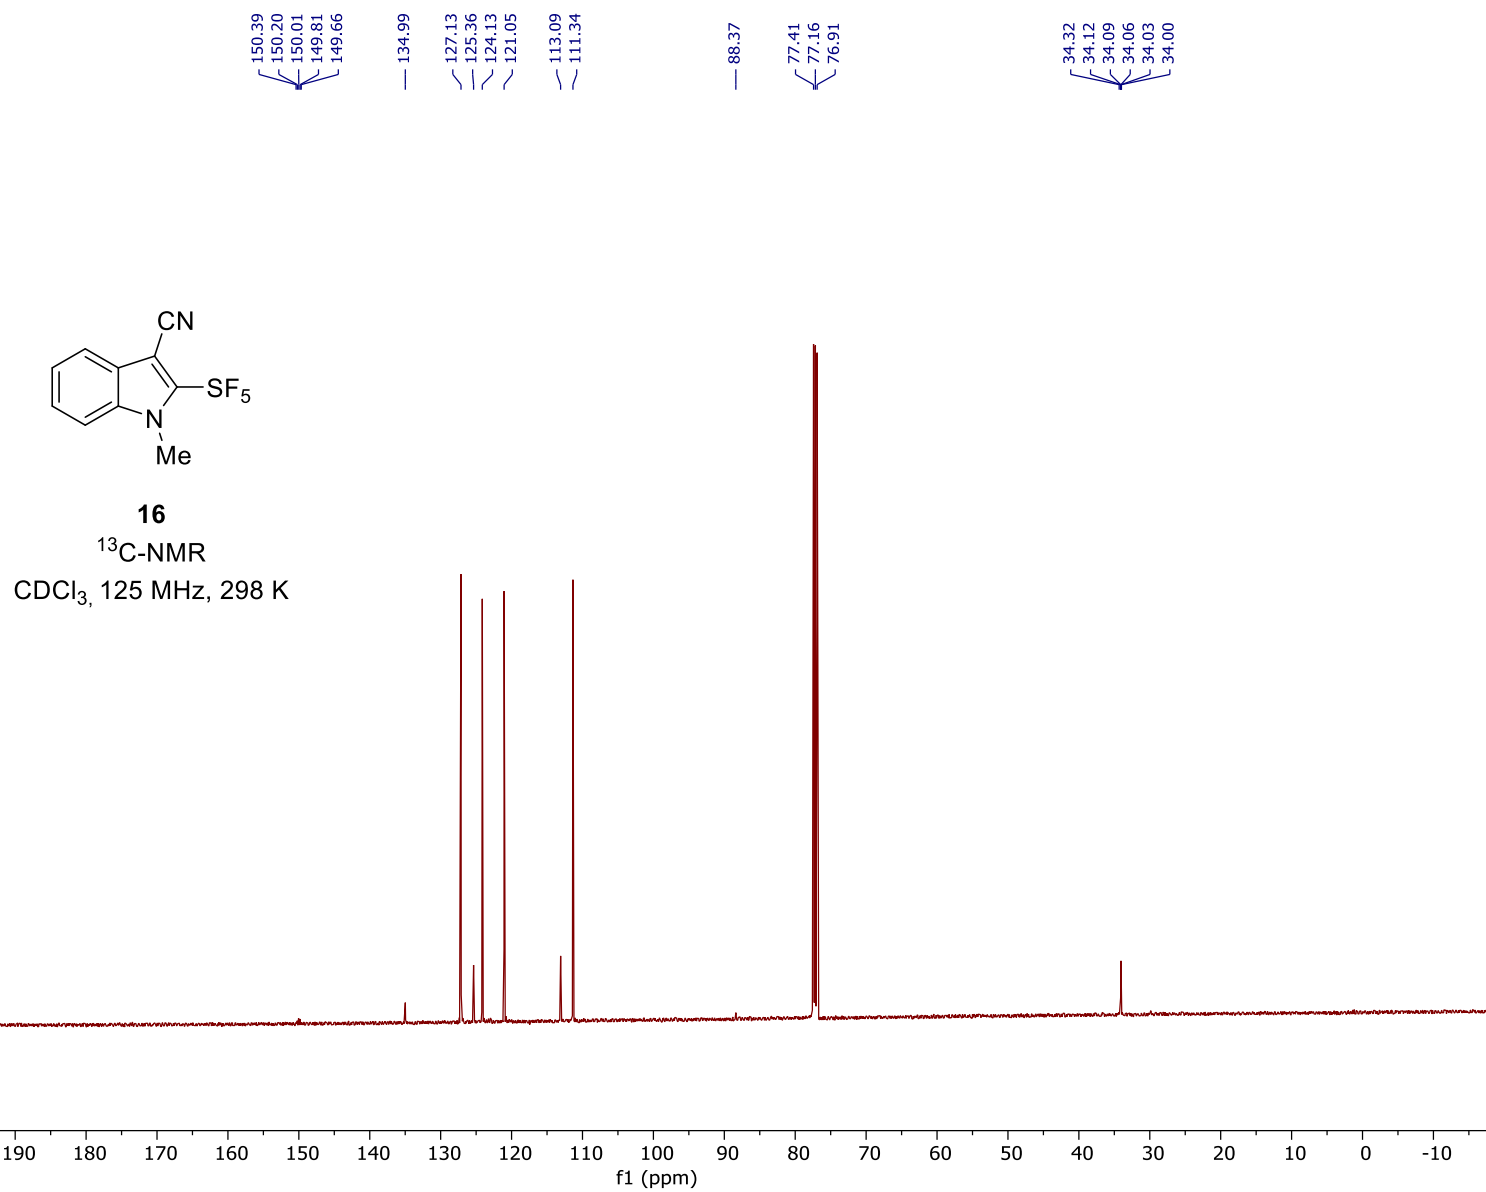

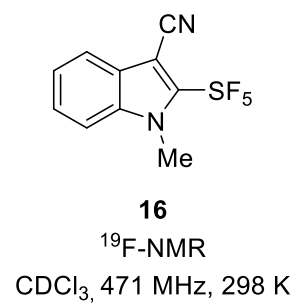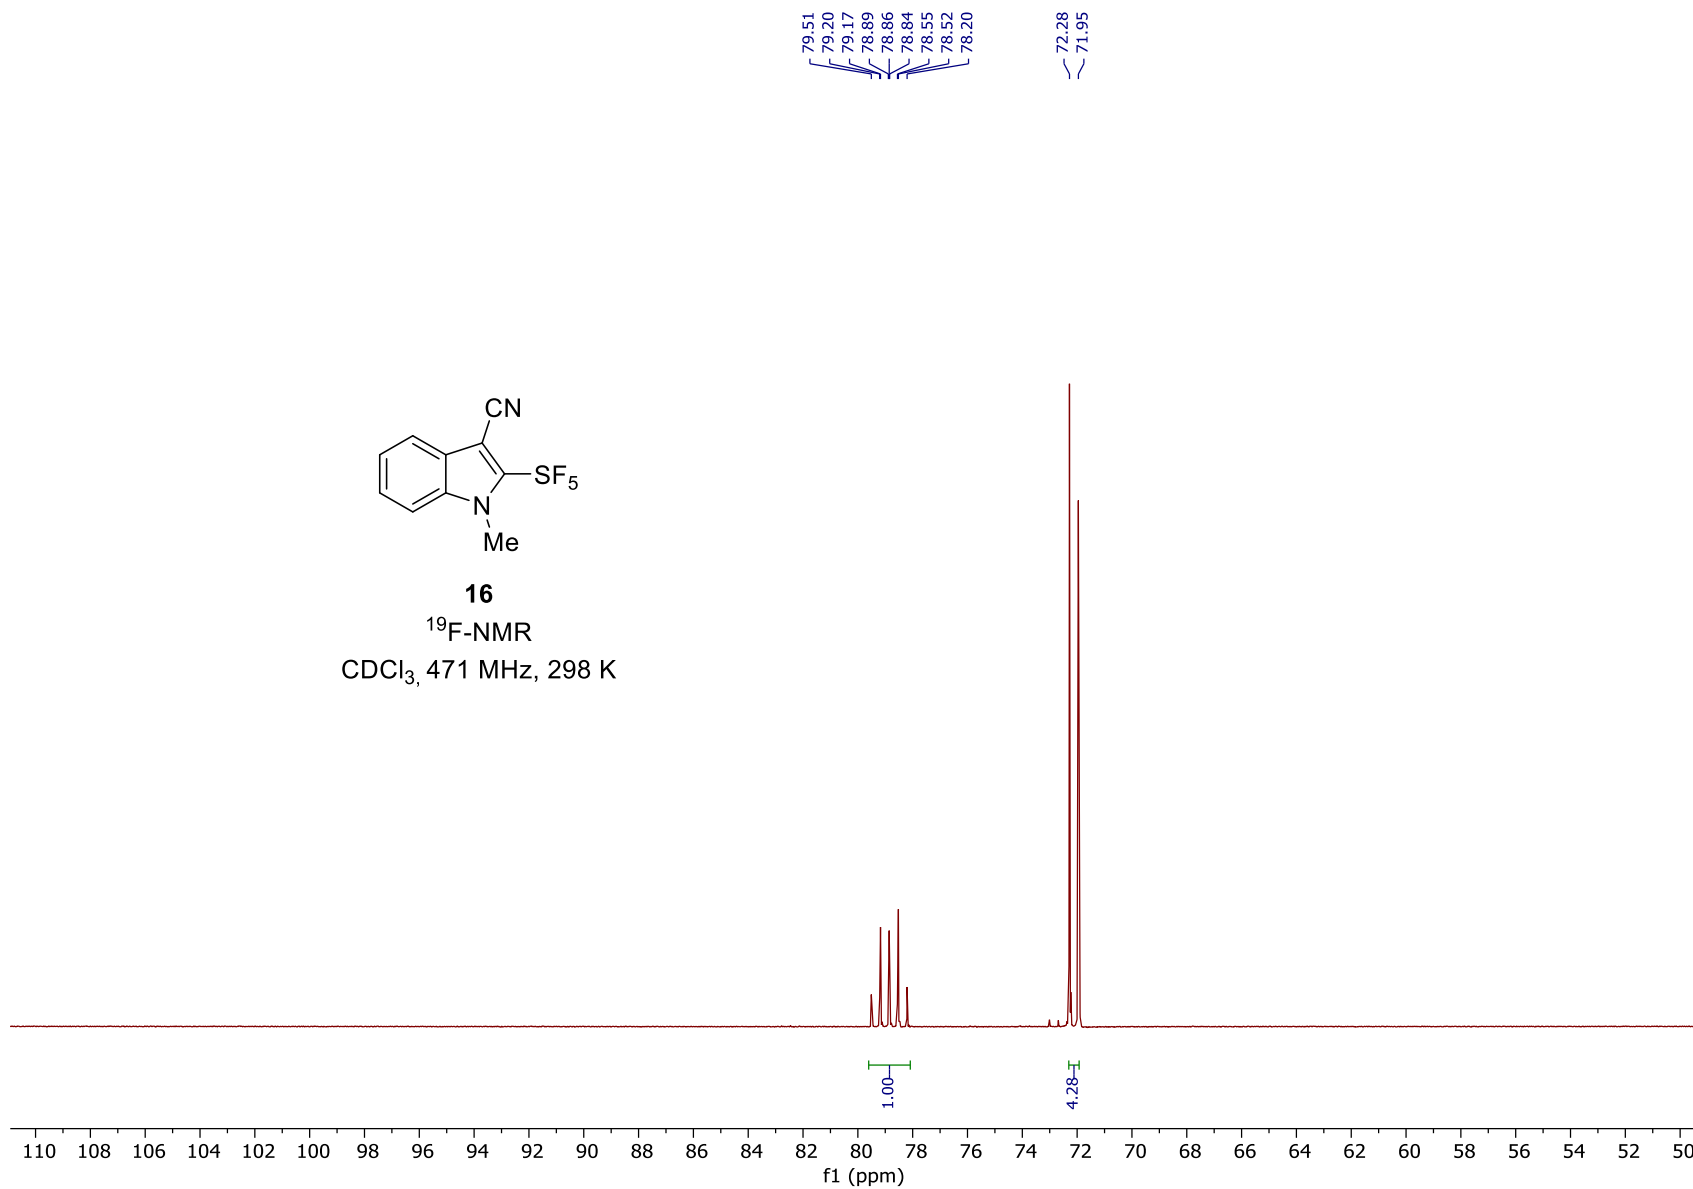

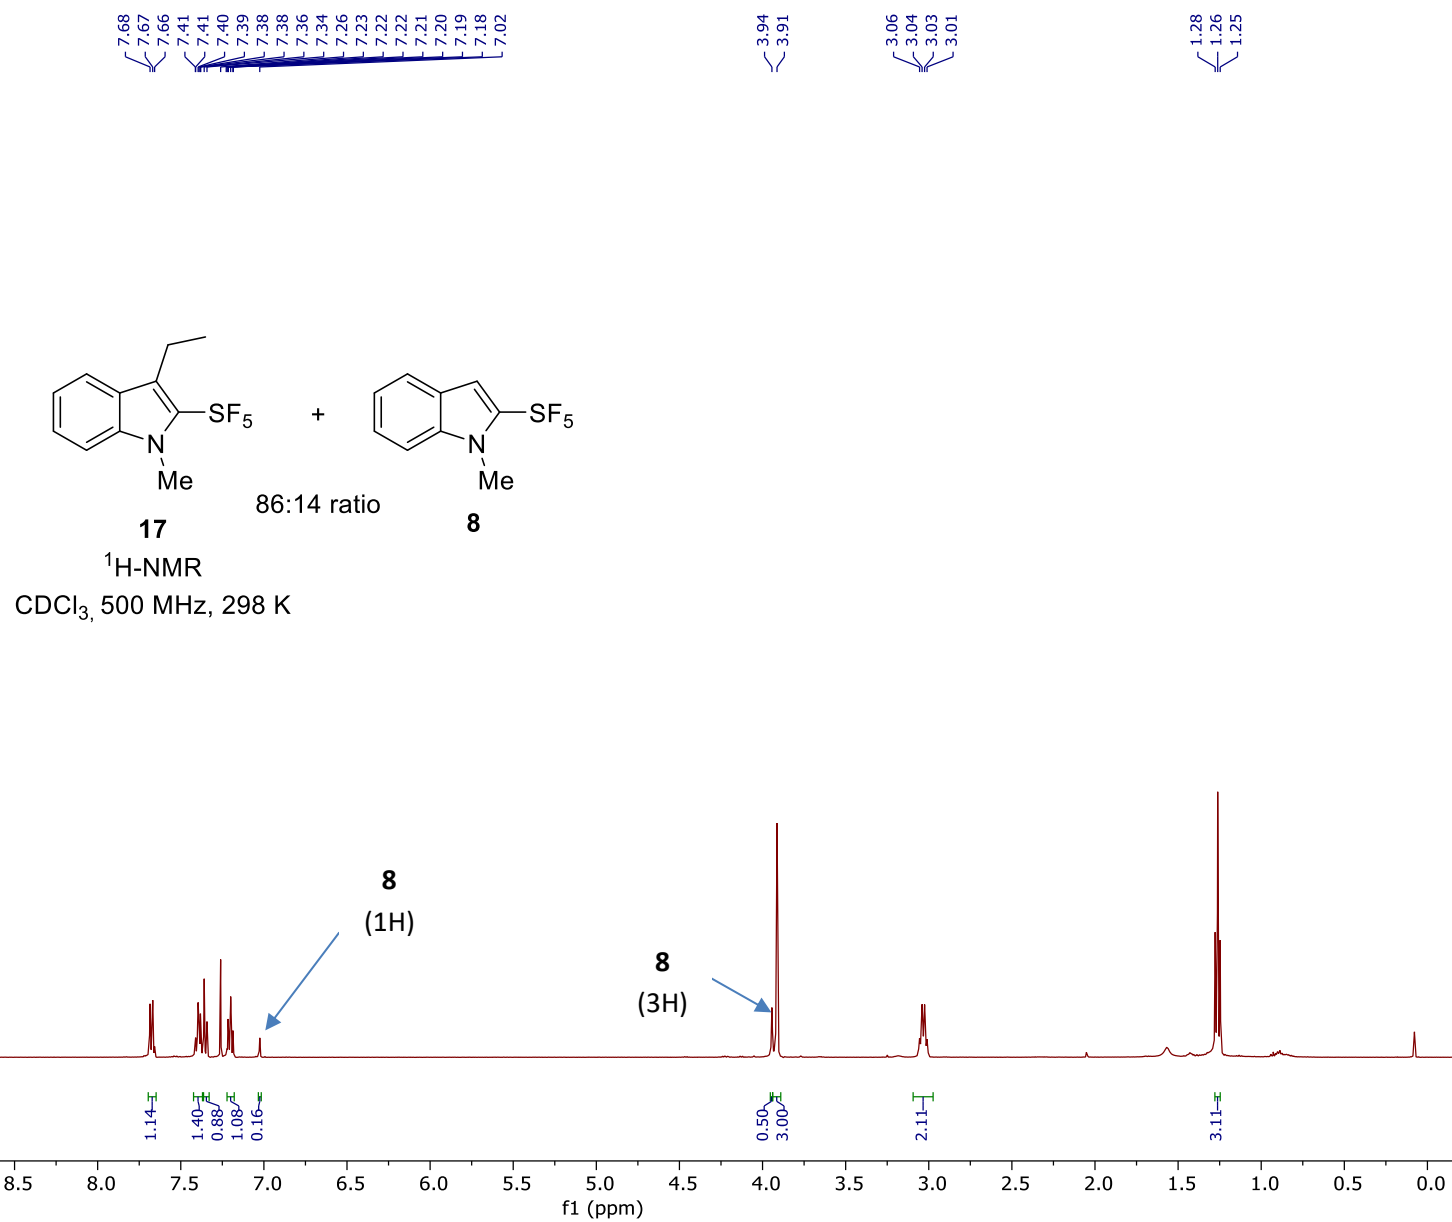

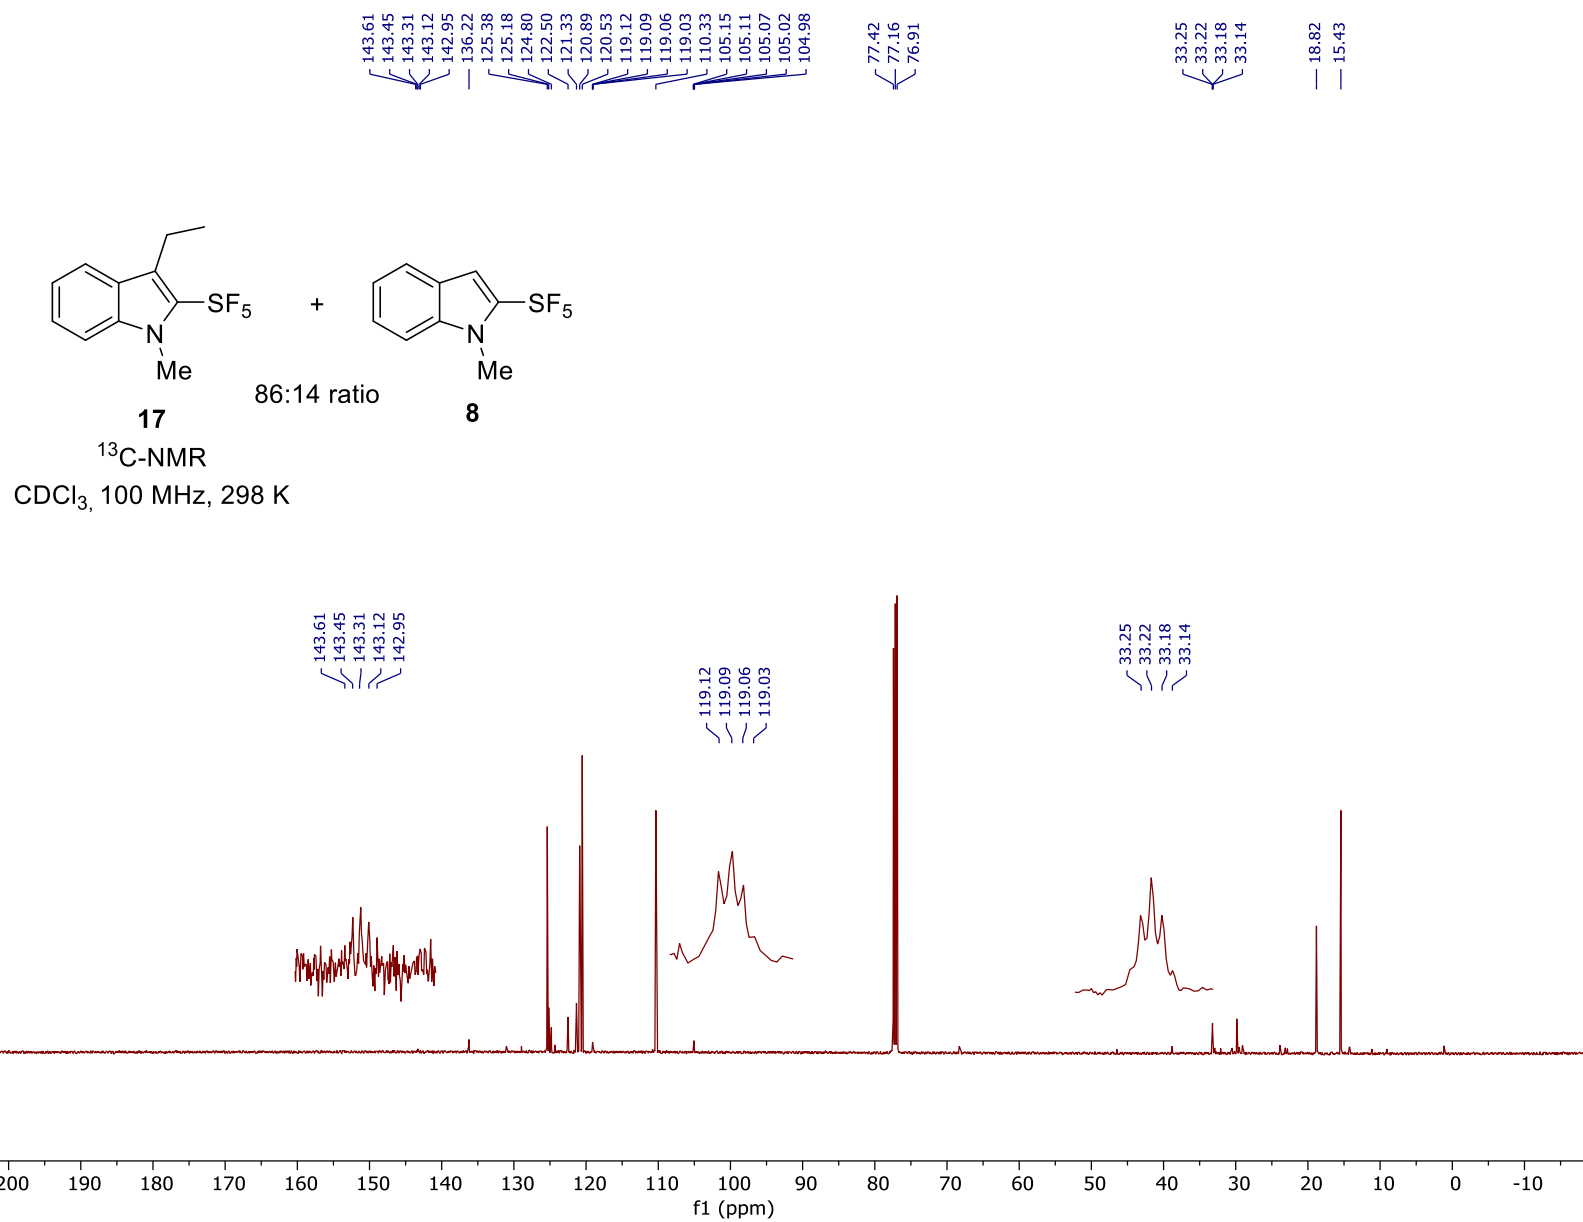

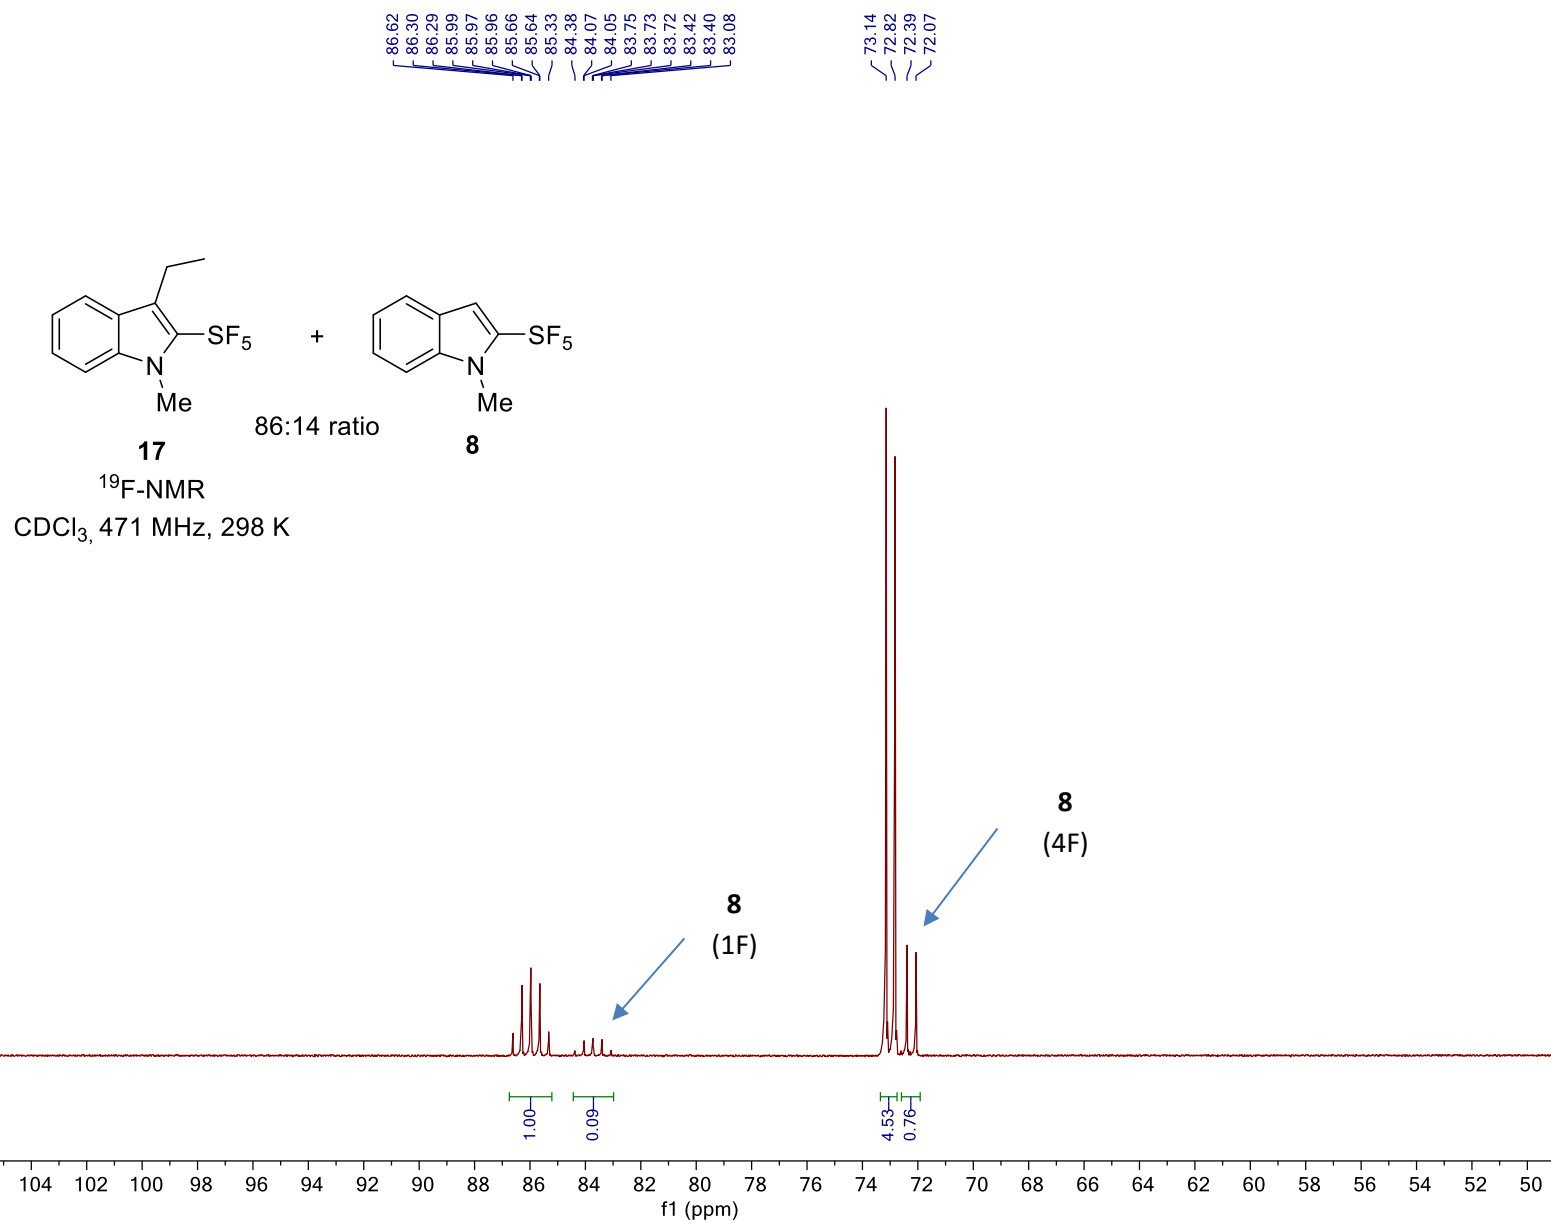

8.16  
8.13  
7.96  
7.94  
7.48  
7.46  
7.46  
7.45  
7.44  
7.44  
7.42  
7.33  
7.33  
7.32  
7.31  
7.31  
7.30  
7.30  
7.26  
6.58  
6.54

4.00  
3.85

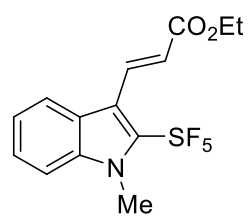

**18**

<sup>1</sup>H-NMR

CDCl<sub>3</sub>, 500 MHz, 298 K

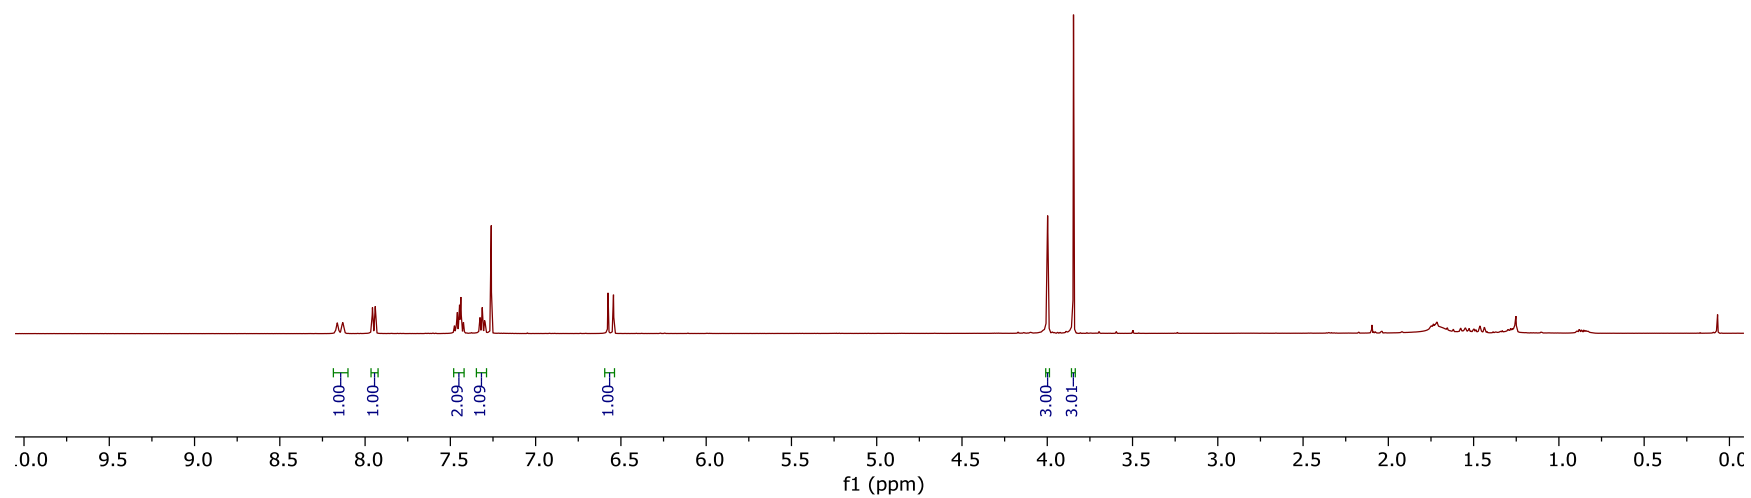



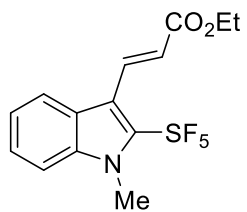**18** $^{13}\text{C}$ -NMR $\text{CDCl}_3$ , 400 MHz, 298 K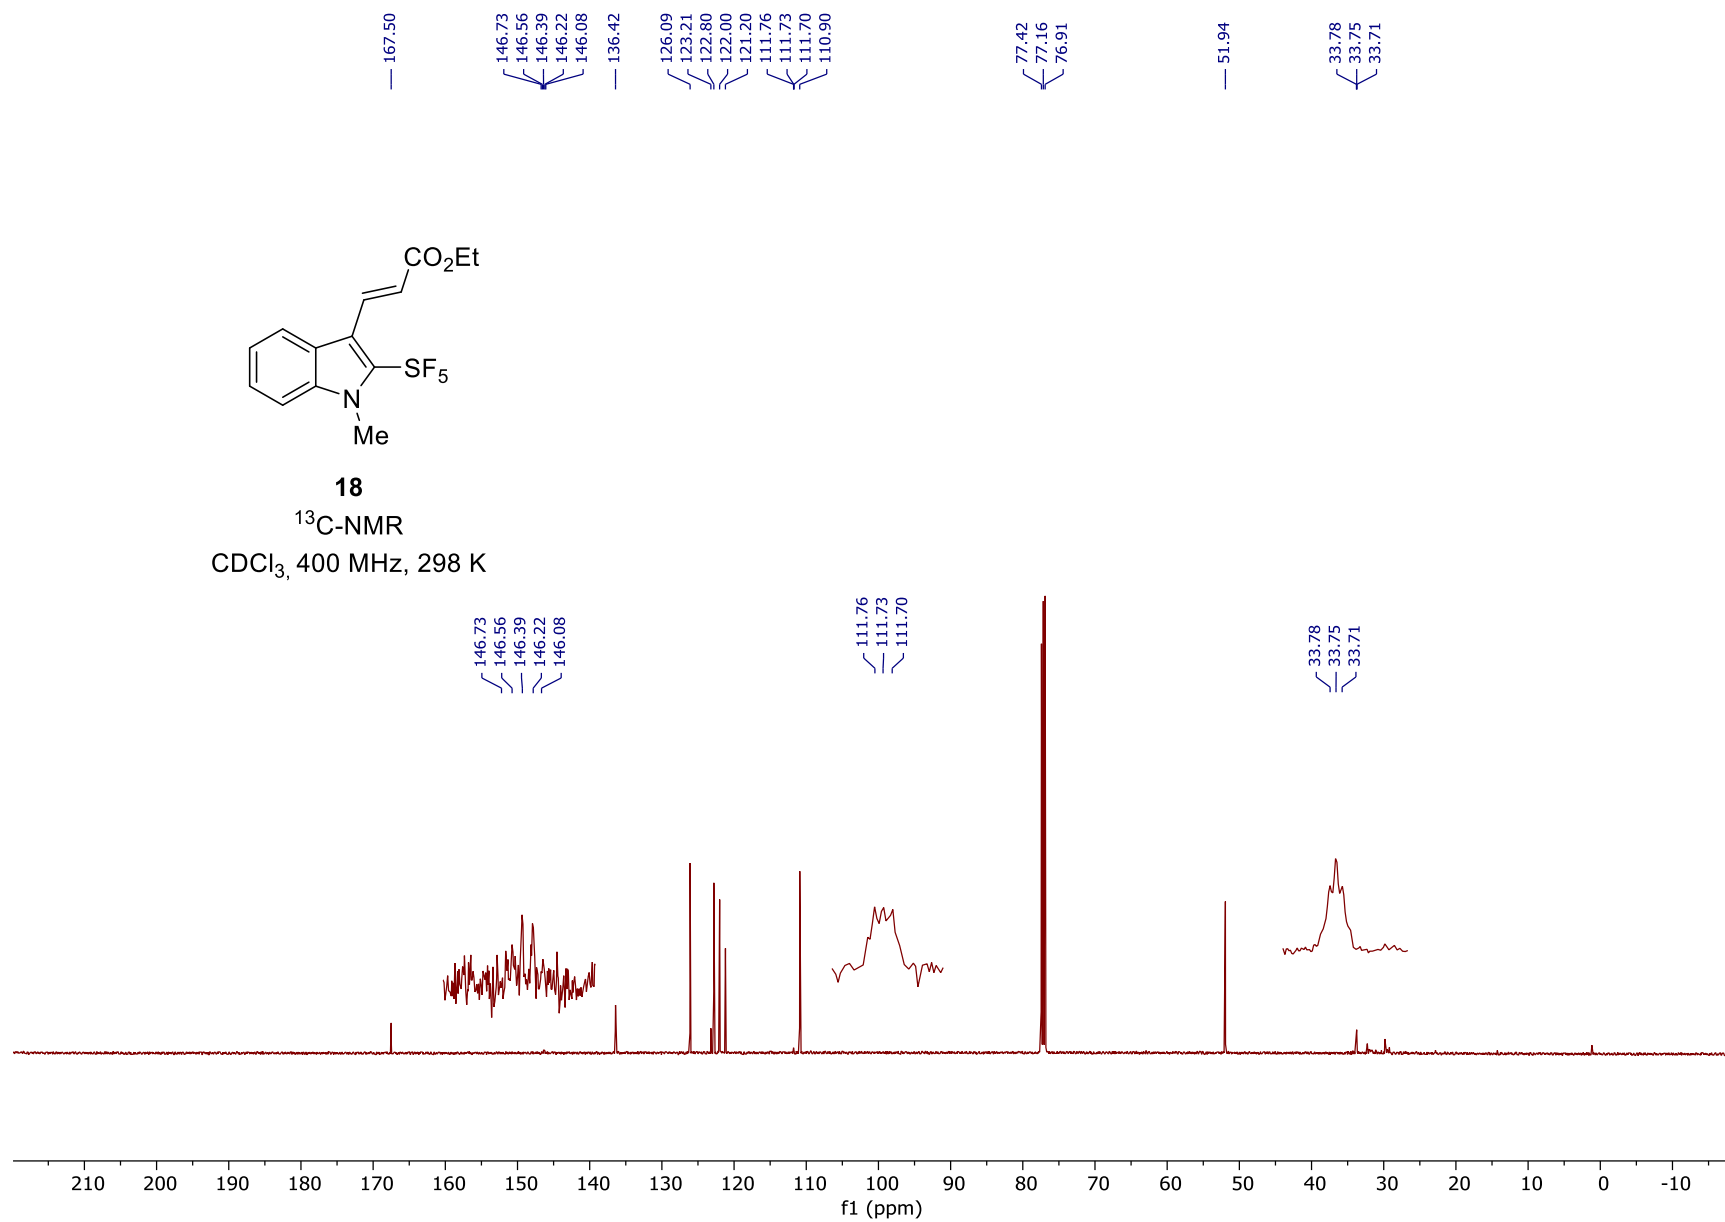

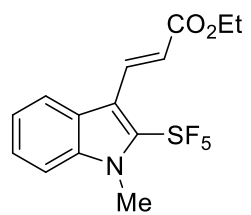**18**<sup>19</sup>F-NMRCDCl<sub>3</sub>, 471 MHz, 298 K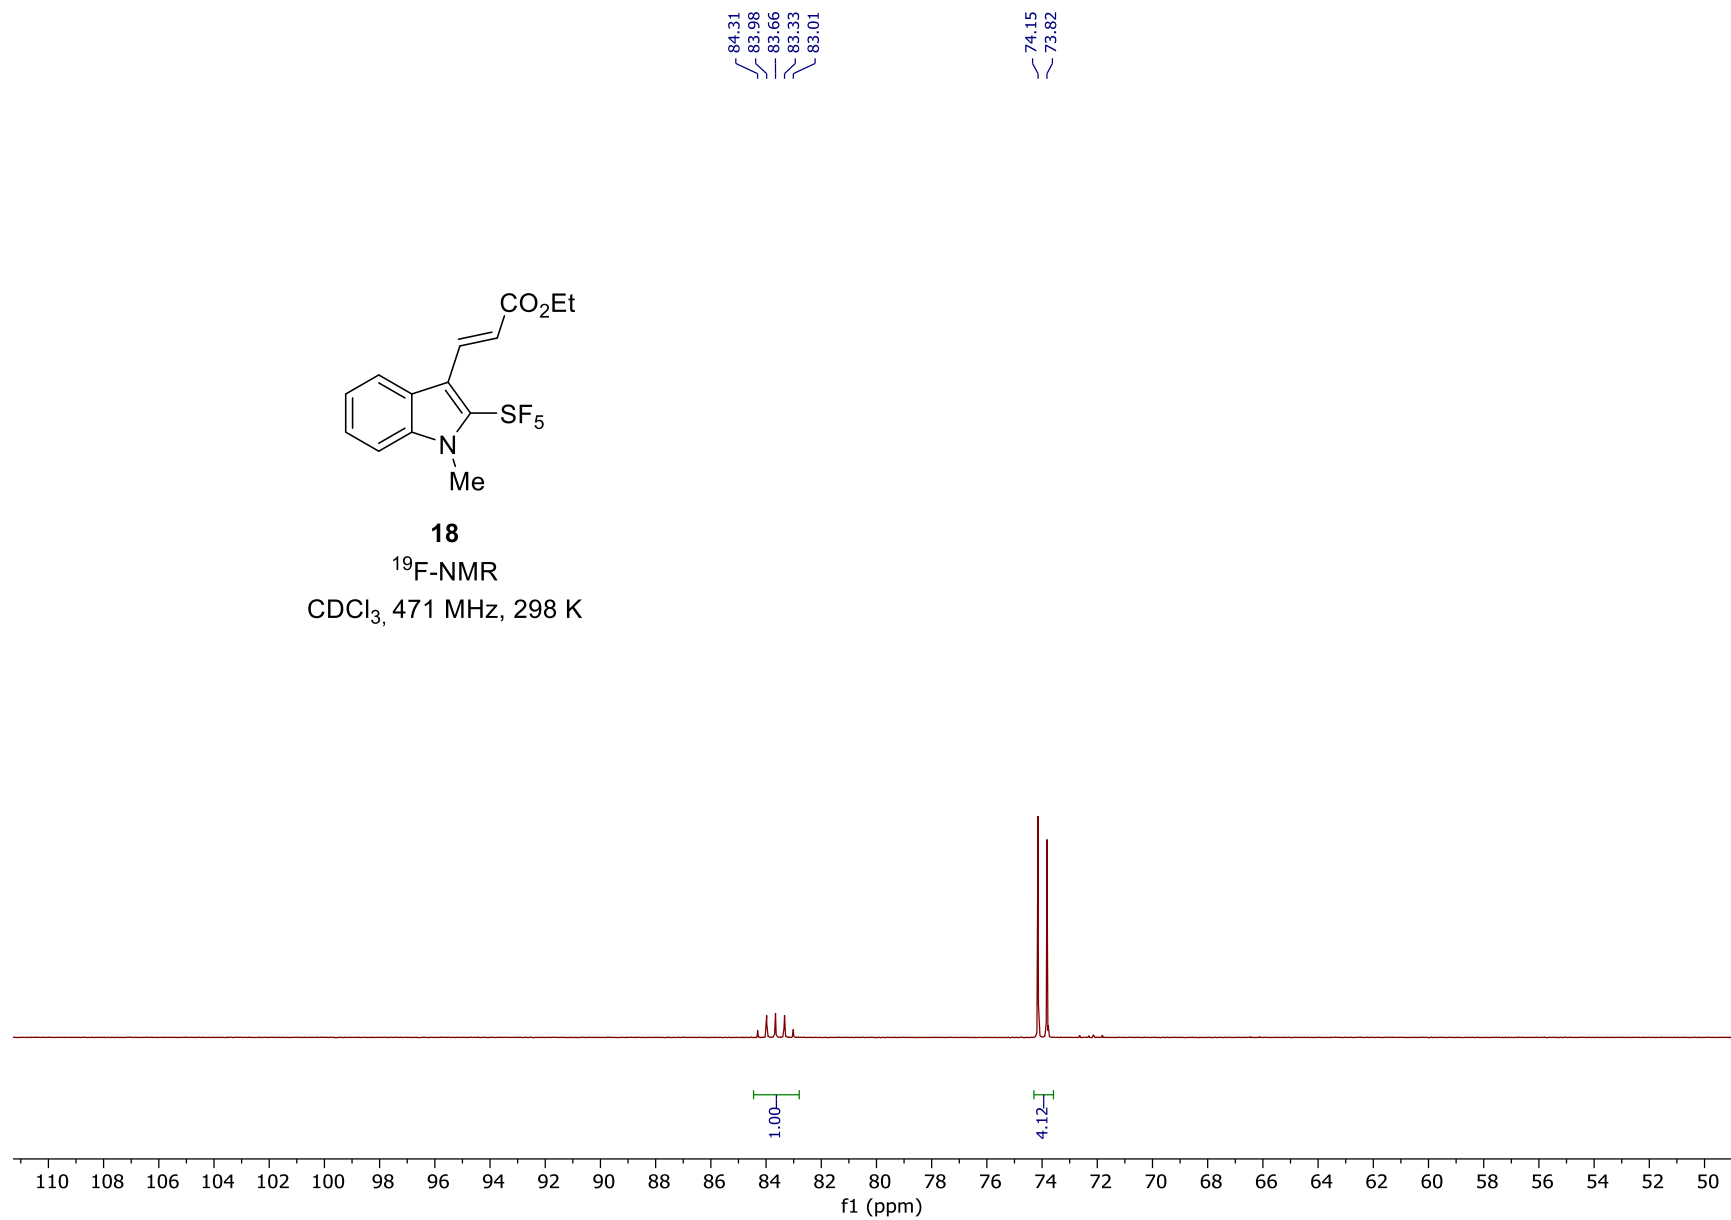

— 13.19

— 9.79

8.11  
8.09  
7.57  
7.55  
7.45  
7.43  
7.42  
7.30  
7.28  
7.27

— 4.69

— 3.36

— 2.82

— 2.50

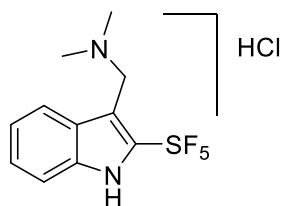**19**<sup>1</sup>H-NMRDMSO-d<sub>6</sub>, 500 MHz, 298 K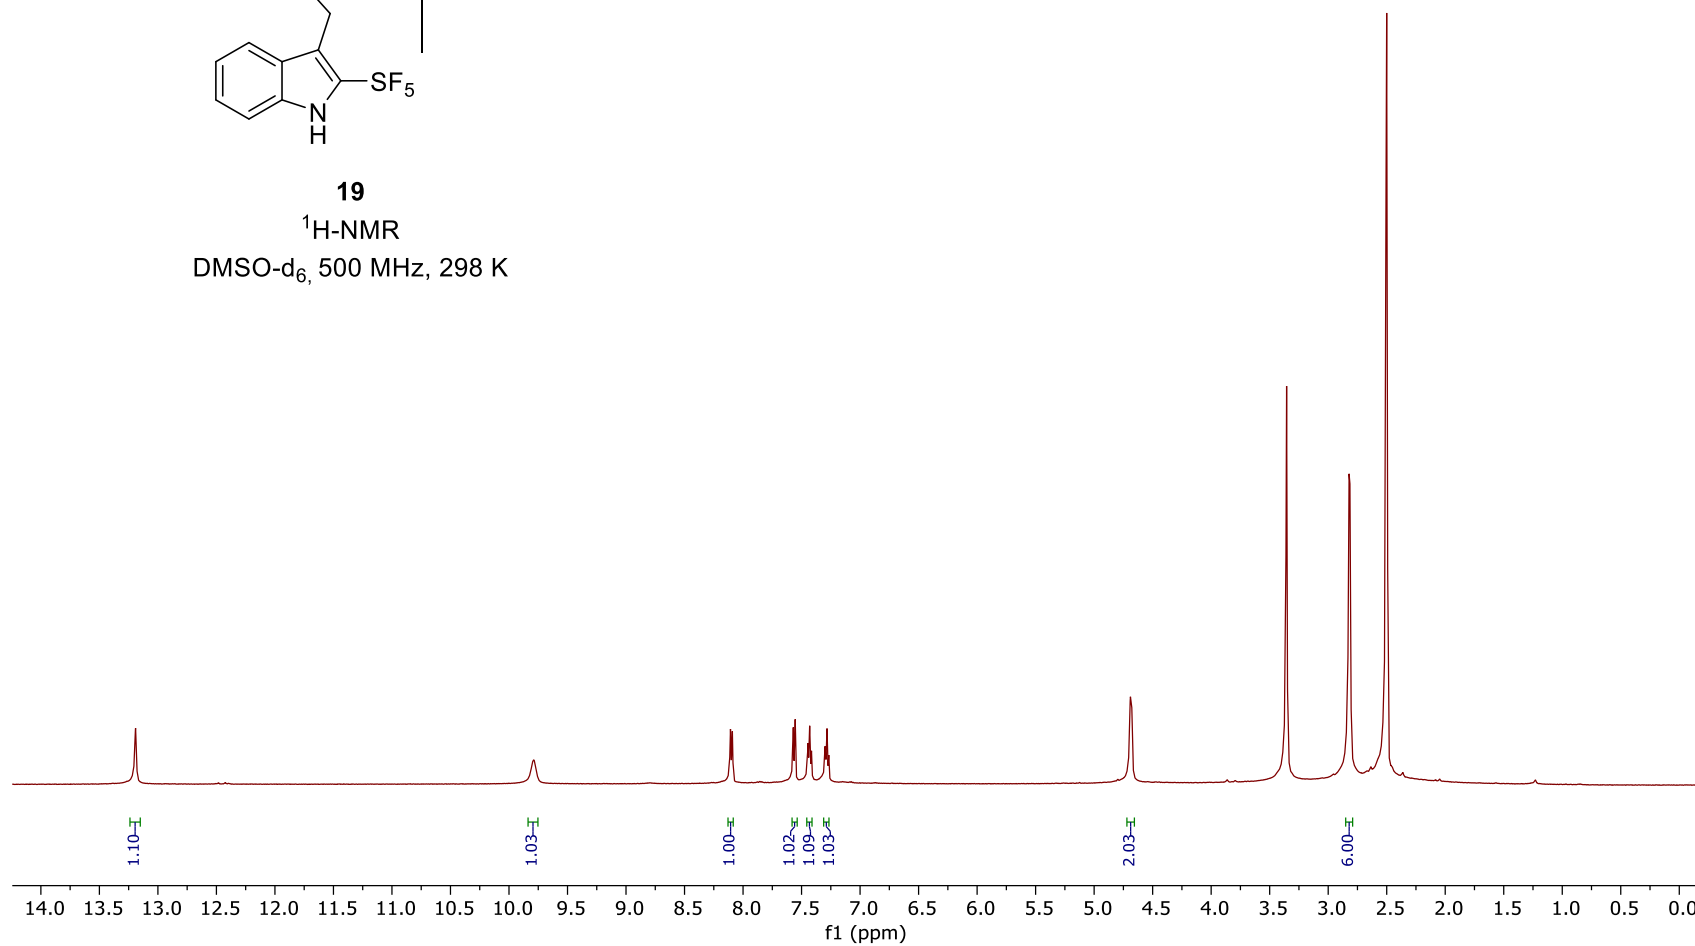

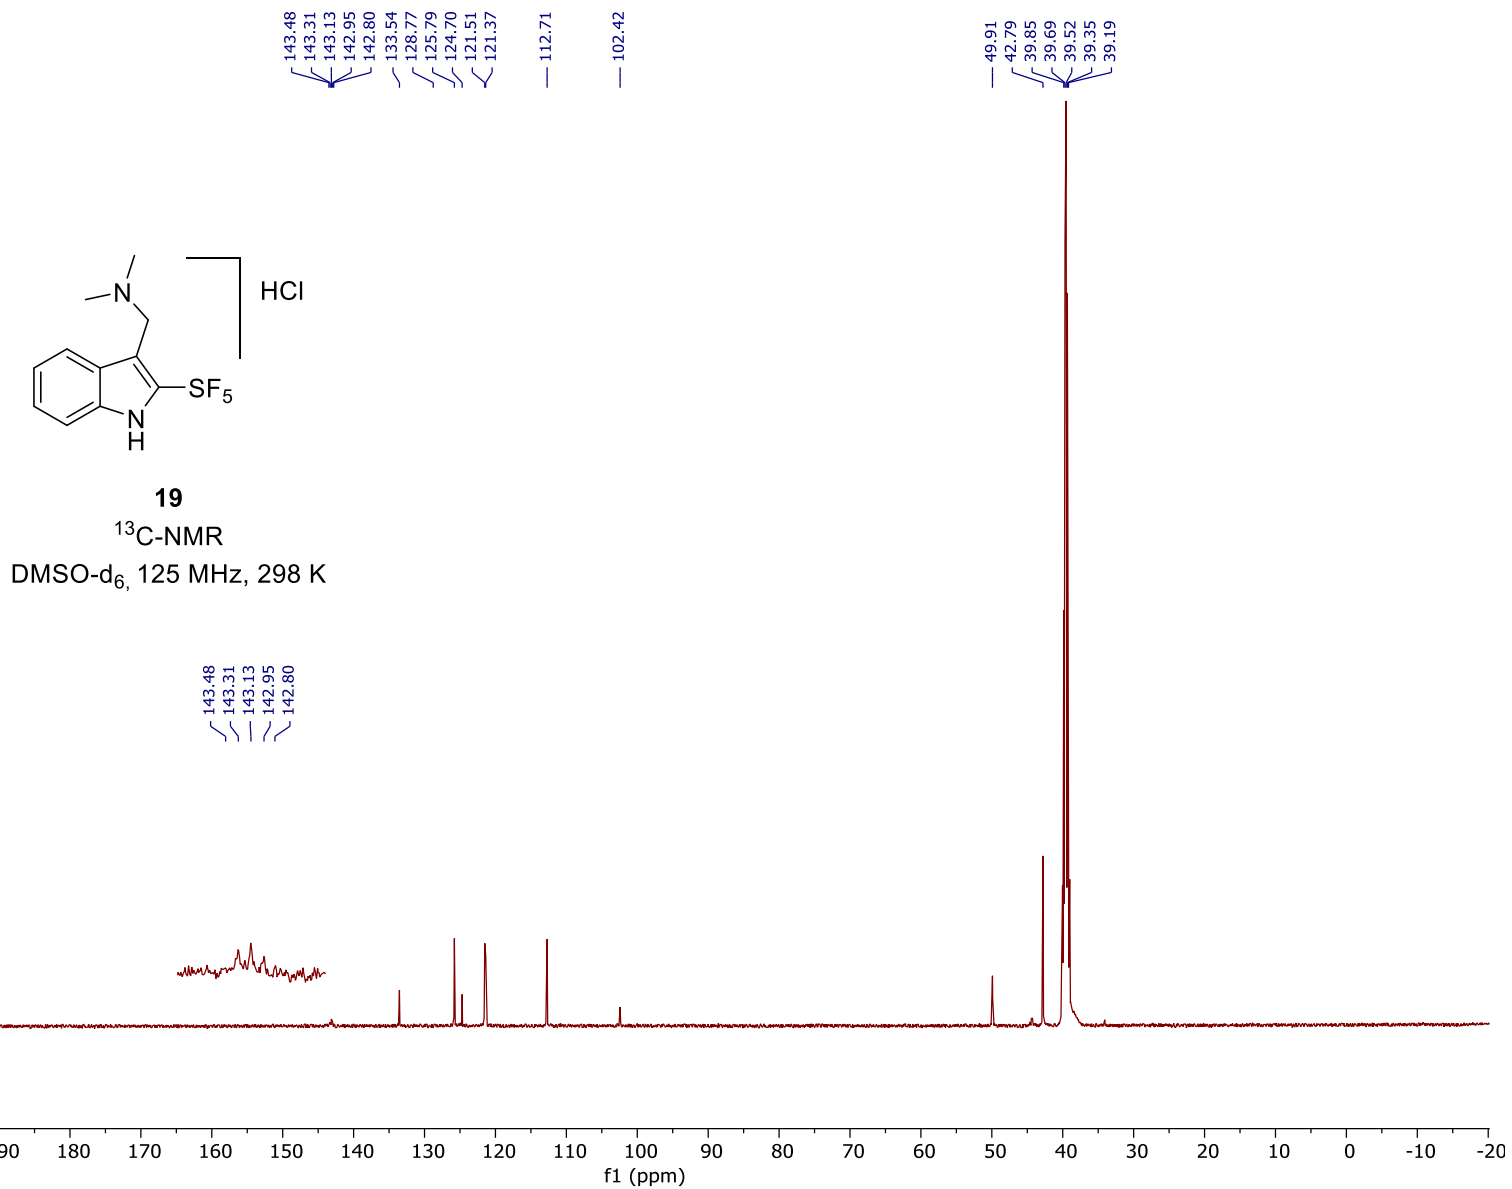

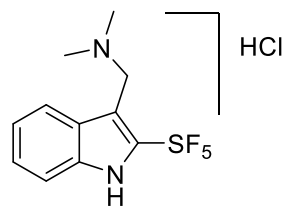**19**<sup>19</sup>F-NMRDMSO-d<sub>6</sub>, 471 MHz, 298 K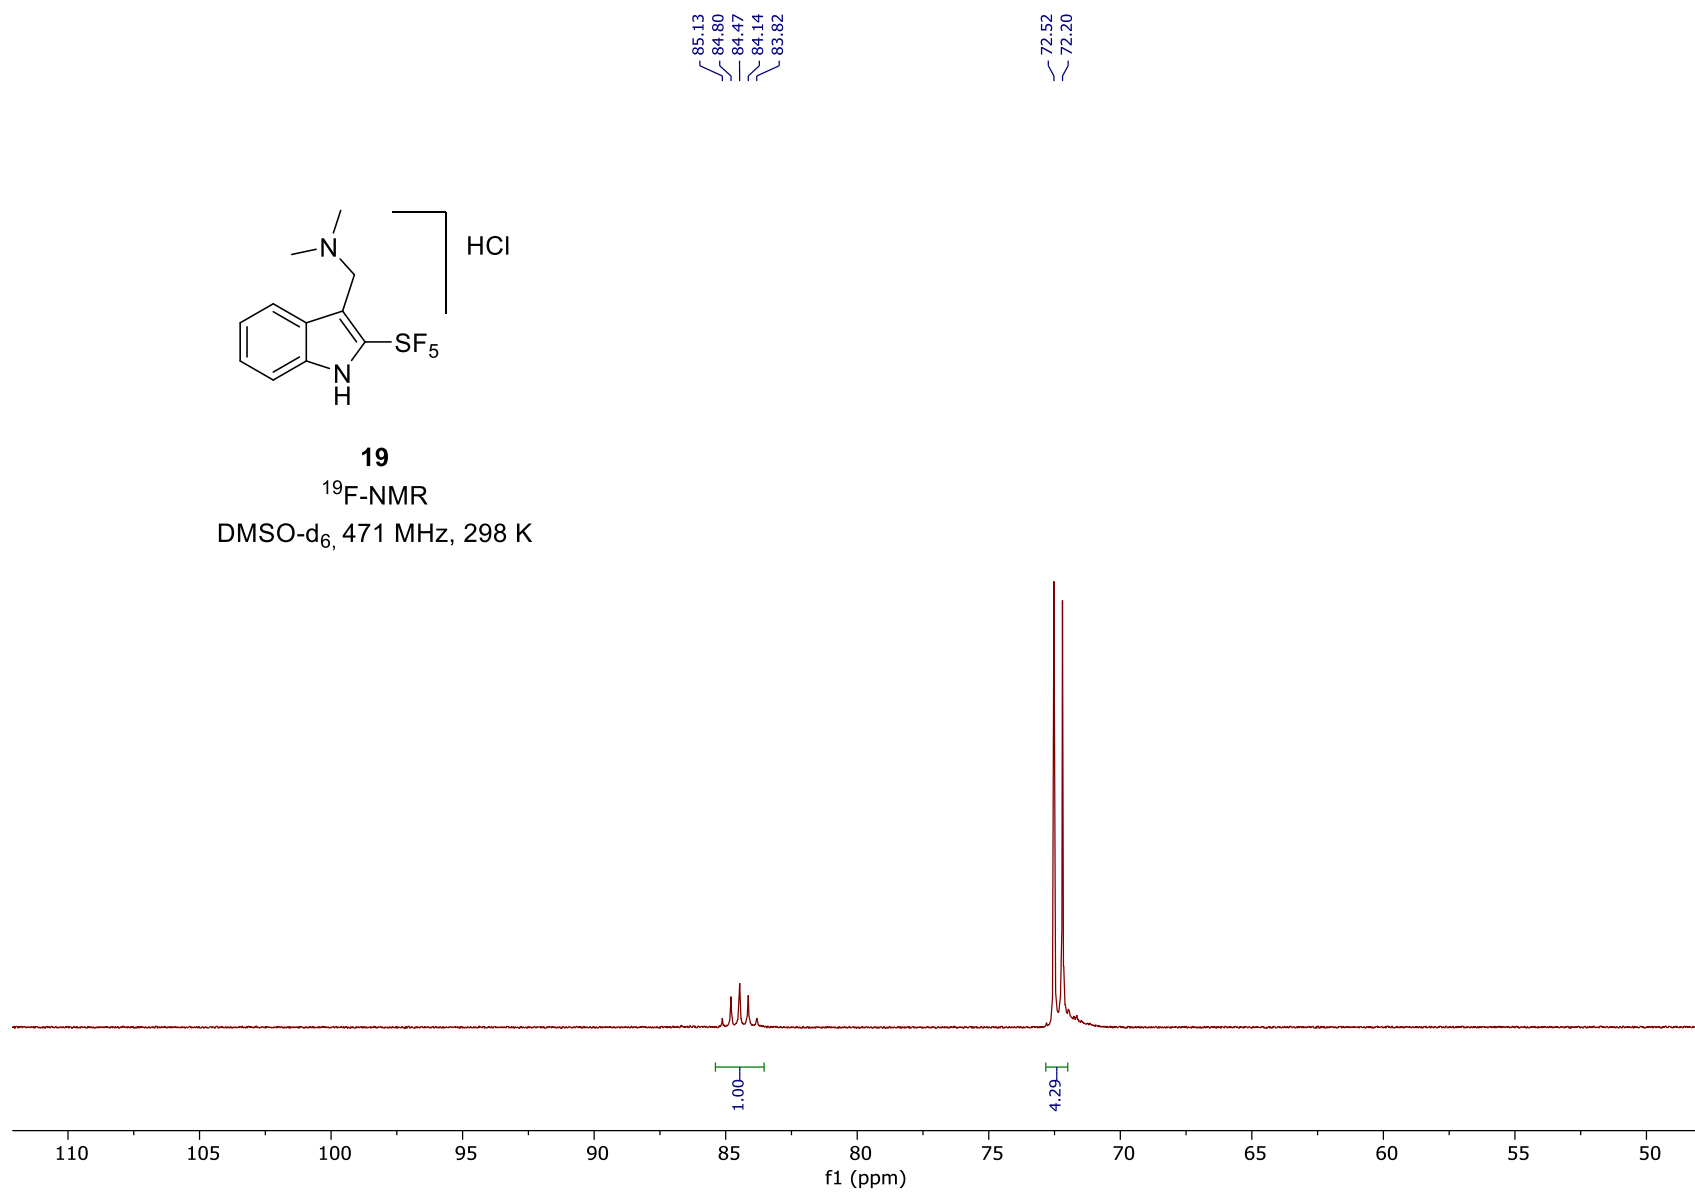

Supplement: gg1c00010_si_001.pdf [file gg1c00010_si_001.pdf]
